# Supplementary material
Source: Research Square preprint supplement (doi:10.21203/rs.3.rs-9238373/v1)
Supplement: Supplementary file 1 [file 9fa1a9452a5f3e0e8622e191.xlsx]

## Sheet: ST1
Supplementary Table 1. Summary of DXA-derived lean mass associations for 63 independent loci, including muscle-related and anthropometric traits, and their effects on gene expression and protein levels. Lean mass phenotypes were derived from whole-body and regional (arms, legs, trunk) fat and lean mass measurements based on Hologic DXA reports in Iceland and imputed DXA data from the UK Biobank (…
Characteristics of sentinel variants from the DXA-derived lean mass GWASs														Coding variants in LD (r2 > 0.8)				pQTLs in LD (r2 > 0.8) from deCODE data; Iceland (Somascan) and UK Biobank (Olink)							sQTLs in LD (r2 > 0.8) from gtex catalog									eQTLs in LD (r2 > 0.8) from various sources										Arm lean mass meta-analysis
Chrom	Pos	rsName	Effect Allele	Other Allele	Gene	close genes	ICE freq	UK Biobank freq	max impact	Weighted bonferroni threshold	coding effect	coding change		coding genes	coding r2	coding rsNames		cis-pQTL Genes	N trans-pQTLs	trans-pQTLs Genes	pQTL Genes	pQTL rsNames	pQTL r2		n sQTL	cis sQTL genes	cis sQTL rsNames	cis sQTL r2	cis sQTL effects	cis sQTL pvals	cis sQTL tissues	top sQTL gene		n eQTLs	cis eQTL genes	cis eQTL rsNames	cis eQTL r2	cis eQTL effects	cis eQTL pvals	cis eQTL tissues	cis eQTL source	top eQTL gene		Arm lean Effect	Arm lean Pval	Arm lean StdErr	Arm lean Iceland Pval	Arm lean Iceland Effect	Arm lean Iceland se
chr3	129565975	rs2625973†	C	A	PLXND1	PLXND1,H1-8,RHO,IFT122,TMCC1,MBD4	31.75	28.82	MODERATE	2.62e-08	missense_variant	NP_055918.3:p.Leu1412Val		PLXND1	1	rs2625973		.	.	.	.	.	.		1	PLXND1	rs2245278	0.962287	-0.0398015	3.37063e-15	Colon_Sigmoid	PLXND1		.	.	.	.	.	.	.	.	.		-0.0347	7.21e-10	0.0056	0.00105	-0.03671	0.01121
chr2	216800645	rs1548946†	!T	T	.	TNP1,LOC105373876,LINC01921,IGFBP5,IGFBP2,LINC01280	43.04	43.01	LOWEST	1.19e-09	regulatory_region_variant	.		.	.	.		.	.	.	.	.	.		.	.	.	.	.	.	.	.		.	.	.	.	.	.	.	.	.		-0.0289	2.95e-08	0.0052	0.0918	-0.01807	0.01072
chr2	210675783	rs1047891	A	C	CPS1	CPS1,CPS1-IT1,LANCL1,LANCL1-AS1,MYL1,ACADL	26.36	31.62	MODERATE	2.62e-08	missense_variant	NP_001116105.2:p.Thr1406Asn,NP_001356185.1:p.Thr1417Asn,NP_001356186.1:p.Thr1406Asn,NP_001866.2:p.Thr1406Asn		CPS1	1	rs1047891			44	SomaScan: GUSB,CNN1,ASRGL1,MARCKSL1,HGFAC,CA3,CCL16,F13B,TFF1,ASL,HRSP12,CFHR1,STX1A,KNG1; OLINK: ACE2,SDC1,HMOX1,CA3,GUSB,CCL16,APOM,CHI3L1,GGH,CRTAM,WARS,HPGDS,ADGRG1,VAT1,EBI3,FGF21,RTN4R,DSG3,PODXL2,LYPD3,ASS1,DMP1,IGSF9,FCAMR,TNFSF8,LCAT,PEPD,FCN1,RNASE4,HGFAC,KLKB1,F13B,MEP1A,CA12,NCR3LG1	SomaScan: GUSB,CNN1,ASRGL1,MARCKSL1,HGFAC,CA3,CCL16,F13B,TFF1,ASL,HRSP12,CFHR1,STX1A,KNG1; OLINK: ACE2,SDC1,HMOX1,CA3,GUSB,CCL16,APOM,CHI3L1,GGH,CRTAM,WARS,HPGDS,ADGRG1,VAT1,EBI3,FGF21,RTN4R,DSG3,PODXL2,LYPD3,ASS1,DMP1,IGSF9,FCAMR,TNFSF8,LCAT,PEPD,FCN1,RNASE4,HGFAC,KLKB1,F13B,MEP1A,CA12,NCR3LG1	SomaScan: 1,1,1,1,1,1,1,1,1,0.892387,0.892387,0.892387,0.892387,0.892387; OLINK: 1,1,1,1,1,1,1,1,1,1,1,1,1,1,1,1,1,1,1,1,1,1,1,1,1,1,1,1,1,1,1,1,1,0.892387,0.892387	SomaScan: rs1047891,rs1047891,rs1047891,rs1047891,rs1047891,rs1047891,rs1047891,rs1047891,rs1047891,rs715,rs715,rs715,rs715,rs715; OLINK: rs1047891,rs1047891,rs1047891,rs1047891,rs1047891,rs1047891,rs1047891,rs1047891,rs1047891,rs1047891,rs1047891,rs1047891,rs1047891,rs1047891,rs1047891,rs1047891,rs1047891,rs1047891,rs1047891,rs1047891,rs1047891,rs1047891,rs1047891,rs1047891,rs1047891,rs1047891,r…		.	.	.	.	.	.	.	.		.	.	.	.	.	.	.	.	.		0.036	1.47e-10	0.0056	0.213	0.01487	0.01194
chr1	41025898	rs11354039†	CA	CAA	SLFNL1	SLFNL1-AS1,SCMH1,SLFNL1,CTPS1,CITED4,KCNQ4	34.09	32.37	LOW	2.38e-09	upstream_gene_variant	.		.	.	.		.	.	.	.	.	.		.	.	.	.	.	.	.	.		7	SCMH1,SCMH1,SCMH1,SCMH1,SCMH1,SLFNL1,SLFNL1	.,rs2885697,rs2885697,rs2885697,rs2885697,rs2885697,rs2885697	0.915981,0.916064,0.916064,0.916064,0.916064,0.916064,0.916064	-0.413,18.6492,0.237299,0.334882,0.314300232110085,0.309136,0.311812	2.427e-12,1.2866e-77,1.50531e-14,2.19423e-23,5.81006956597414e-179,8.85015933714744e-10,9.9651090834245e-10	white_blood_cells,blood,Artery_Aorta,Nerve_Tibial,blood,T_helper_cells,T_killer_cells	white_blood_cells_ceqtl,eqtlgen,gtceqtl,gtceqtl,dcceqtl_blood,dcceqtl_T_helper_cells,dcceqtl_T_killer_cells	SCMH1		0.0312	1.31e-08	0.0055	0.00947	0.02899	0.01117
chr3	12426911	chr3:12426911†	!G	G	PPARG	PPARG,TSEN2,MKRN2OS,MKRN2,RAF1,SYN2	10.24	12.01	VEP_failed	3.97e-10	VEP_failed	NM_001330615.4:c.730-6987G>A		.	.	.		.	.	.	.	.	.		.	.	.	.	.	.	.	.		.	.	.	.	.	.	.	.	.		0.0511	2.02e-10	0.008	0.00156	0.05441	0.0172
chr6	31871532	rs2242665†	!T	T	SLC44A4	SLC44A4,EHMT2-AS1,EHMT2,NEU1,C2,ZBTB12	46.38	47.63	MODERATE	2.62e-08	missense_variant	NP_001171515.1:p.Val145Ile,NP_001171516.1:p.Val111Ile,NP_079533.2:p.Val187Ile		SLC44A4,SLC44A4	0.999966,1	rs644827,rs2242665		.	.	.	.	.	.		.	.	.	.	.	.	.	.		2	HSPA1B,HSPA1B	.,rs660550	0.9999,0.9999	-0.163543,-0.163543	6.883e-14,6.883e-14	Fat,Fat	grundb_adi_lcl_skin_ceqtl,grundb_adi_lcl_skin_ceqtl	HSPA1B		0.0142	0.00572	0.0051	0.285	0.0113	0.01057
chr2	164683151	rs6717858†	C	T	COBLL1	COBLL1,SNORA70F,GRB14,LOC101929633,SLC38A11,SCN3A	46.65	40.25	LOW	2.38e-09	3_prime_UTR_variant	NM_001278458.2:c.*2795A>G,NM_001278460.2:c.*2795A>G,NM_001278461.2:c.*2795A>G,NM_001365670.2:c.*2795A>G,NM_001365672.2:c.*2795A>G,NM_001365673.2:c.*2795A>G,NM_001365674.2:c.*2795A>G,NM_001365675.2:c.*2795A>G,NM_014900.5:c.*2795A>G		.	.	.			2	SomaScan: LEP; OLINK: ITIH3	SomaScan: LEP; OLINK: ITIH3	SomaScan: 0.898202; OLINK: 0.882659	SomaScan: rs10184004; OLINK: rs397791024,rs5835988		.	.	.	.	.	.	.	.		.	.	.	.	.	.	.	.	.		-0.0492	3.67e-21	0.0052	5.71e-08	-0.05724	0.01055
chr6	127118902	rs577721086†	C	T	RSPO3	RSPO3,RNF146,ECHDC1,KIAA0408,SOGA3-KIAA0408,SOGA3	7.29	5.11	LOW	2.38e-09	5_prime_UTR_variant	NM_032784.5:c.-291T>C		.	.	.			5	SomaScan: FABP4,FABP3; OLINK: LPL,FABP4,ITIH3,ANGPTL3	SomaScan: FABP4,FABP3; OLINK: LPL,FABP4,ITIH3,ANGPTL3	SomaScan: 1,1; OLINK: 1,0.994967,0.994967,0.807396	SomaScan: rs577721086,rs577721086; OLINK: rs577721086,rs72959041,rs72959041,chr6:127203253		.	.	.	.	.	.	.	.		1	RSPO3	rs577721086	1	0.982849	1.21132300232753e-24	adipose	dcceqtl_adipose	RSPO3		0.0675	1.39e-09	0.0111	4.68e-10	0.12483	0.02004
chr14	92651884	rs117068593	T	C	RIN3	RIN3,LGMN,GOLGA5,SLC24A4,LINC02287,CHGA	15.96	18.94	MODERATE	2.62e-08	missense_variant	NP_001306916.1:p.Arg204Cys,NP_079108.3:p.Arg279Cys		RIN3	1	rs117068593			3	OLINK: SPP1,ESM1,WIF1	OLINK: SPP1,ESM1,WIF1	OLINK: 1,1,1	OLINK: rs117068593,rs117068593,rs117068593		.	.	.	.	.	.	.	.		.	.	.	.	.	.	.	.	.		0.0212	0.00145	0.0067	0.027	0.03201	0.01448
chr2	219489386	rs55760516†	G	A	SPEG	SPEG,SPEGNB,GMPPA,ASIC4,CHPF,TMEM198	34.38	32.33	MODERATE	2.62e-08	missense_variant	NP_005867.3:p.Arg2790Gly		SPEG,SPEG,SPEGNB,SPEGNB	1,0.999237,0.849024,0.848989	rs55760516,rs12464085,chr2:219497835,rs12474050		.	.	.	.	.	.		8	SPEG,SPEG,SPEG,SPEG,SPEG,SPEG,SPEG,SPEG	rs1810144,rs881589,rs875097,rs875097,rs1078212,rs2010592,.,rs12474050	0.987309,0.829272,0.828657,0.828657,0.961253,0.846276,0.849024,0.848989	-0.0309856,-0.0258811,-0.0284821,-0.0413727,0.0276434,-0.0321591,0.0456004,0.0456004	1.04668e-11,4.53201e-10,3.0394e-42,6.85646e-27,1.15274e-11,1.31871e-41,4.27361e-11,4.27361e-11	Esophagus_Gastroesophageal_Junction,Colon_Transverse,Muscle_Skeletal,Artery_Aorta,Heart_Atrial_Appendage,Artery_Tibial,Artery_Coronary,Artery_Coronary	SPEG		5	SPEG,ASIC4,SPEG,SPEG,SPEG	rs3731906,rs1050816,rs2010592,.,rs12474050	0.94138,0.961292,0.846276,0.849024,0.848989	0.337826,0.0560885223868231,0.413152,0.40234759958431,0.40234759958431	2.09699891586844e-11,4.29421077217952e-07,1.41851113660354e-18,2.10155210727053e-292,2.10155210727053e-292	T_killer_cells,blood,Monocytes,blood,blood	dcceqtl_T_killer_cells,dcceqtl_blood,dcceqtl_Monocytes,dcceqtl_blood,dcceqtl_blood	SPEG		-0.0208	0.000147	0.0055	0.182	-0.01487	0.01115
chr20	34545380	rs6088521†	C	A	MAP1LC3A	MAP1LC3A,DYNLRB1,PIGU,ITCH,MIR644A,TP53INP2	47.5	47.86	LOW	2.38e-09	upstream_gene_variant	.		.	.	.		.	.	.	.	.	.		.	.	.	.	.	.	.	.		.	.	.	.	.	.	.	.	.		0.021	4.26e-05	0.0051	0.11	0.01676	0.01048
chr1	219580167	rs2820443†	C	T	.	LYPLAL1-AS1,ZC3H11B,LYPLAL1,SLC30A10,EPRS1,LYPLAL1-DT	33.57	29.93	LOWEST	1.19e-09	regulatory_region_variant	.		.	.	.			2	SomaScan: ADIPOQ; OLINK: DMP1	SomaScan: ADIPOQ; OLINK: DMP1	SomaScan: 0.943206; OLINK: 0.918358	SomaScan: rs750994023; OLINK: rs7538503		.	.	.	.	.	.	.	.		.	.	.	.	.	.	.	.	.		-0.0474	1.64e-17	0.0056	1.92e-09	-0.06703	0.01116
chr2	178848941	rs13004438†	C	T	CCDC141	CCDC141,TTN,LOC101927055,TTN-AS1,SESTD1,PLEKHA3	36.11	41.02	LOWEST	3.97e-10	intron_variant	NM_173648.4:c.3357+1108A>G		.	.	.		.	.	.	.	.	.		.	.	.	.	.	.	.	.		.	.	.	.	.	.	.	.	.		0.0199	0.000147	0.0053	0.0567	0.0209	0.01097
chr7	85058747	rs67267318†	CAAAAA	CAAAAAA	SEMA3D	SEMA3D,LINC00972,LINC03017,SEMA3A	25.5	28.55	LOWEST	3.97e-10	intron_variant	NM_001384900.1:c.719-2889del,NM_001384901.1:c.719-2889del,NM_001384902.1:c.719-2889del,NM_001384903.1:c.719-2889del,NM_152754.3:c.719-2889del		.	.	.		.	.	.	.	.	.		.	.	.	.	.	.	.	.		.	.	.	.	.	.	.	.	.		0.0301	2e-07	0.0058	1.08e-05	0.05441	0.01236
chr9	95481586	rs80155616†	T	C	PTCH1	PTCH1,LOC100507346,FANCC,ERCC6L2-AS1,AOPEP,ERCC6L2	12.54	9.06	LOW	2.38e-09	downstream_gene_variant	.		.	.	.		.	.	.	.	.	.		.	.	.	.	.	.	.	.		9	PTCH1,PTCH1,PTCH1,PTCH1,PTCH1,PTCH1,PTCH1,PTCH1,PTCH1	rs59925771,rs59015093,rs16909898,rs28372566,rs2282041,rs10512249,.,rs772121315,rs145965565	0.906922,0.874726,0.947967,0.875531,0.875101,0.942681,0.893882,0.893661,0.893682	35.3051,0.166011,-1.146,0.389374,-0.493365,-0.122274,0.854115,0.854115,0.393326	4.9214e-273,1.50937e-10,8.229e-22,3.76768717211169e-08,9.19e-08,3.446e-12,4.99357e-19,4.99357e-19,6.43141e-15	blood,Whole_Blood,white_blood_cells,T_killer_cells,STARNET_Artery_ITA_(no_AS),LCL,Spleen,Spleen,Cells_Cultured_fibroblasts	eqtlgen,gtceqtl,white_blood_cells_ceqtl,dcceqtl_T_killer_cells,star_ceqtl,grundb_adi_lcl_skin_ceqtl,gtceqtl,gtceqtl,gtceqtl	PTCH1		0.0144	0.0931	0.0086	0.651	0.00715	0.01581
chr6	126530014	rs1490384†	T	C	.	MIR588,CENPW,TRMT11,HINT3,RSPO3,NCOA7	49.54	49.83	LOWEST	1.19e-09	regulatory_region_variant	.		.	.	.		.	.	.	.	.	.		.	.	.	.	.	.	.	.		2	CENPW,CENPW	rs4549631,rs853981	0.898603,0.856378	0.393791,0.163	1.02e-11,2.71e-07	STARNET_Fat_subcutaneous,CD8_ET	star_ceqtl,ss_onek1k_ceqtl	CENPW		0.024	2.76e-06	0.0051	0.0511	0.02052	0.01052
chr3	38452737	rs1870915†	!C	C	ACVR2B	XYLB,ACVR2B-AS1,ACVR2B,EXOG,SCN5A,SLC22A14	40.91	44.68	LOW	2.38e-09	upstream_gene_variant	.		.	.	.		.	.	.	.	.	.		2	EXOG,EXOG	.,rs1984312	0.951481,0.951448	-0.019653,-0.019653	1.99147e-14,1.99147e-14	Thyroid,Thyroid	EXOG		30	ACVR2B,XYLB,EXOG,XYLB,ACVR2B,EXOG,EXOG,EXOG,ACVR2B,EXOG,EXOG,XYLB,XYLB,ACVR2B-AS1,EXOG,EXOG,XYLB,EXOG,EXOG,EXOG,EXOG,EXOG,EXOG,EXOG,EXOG,EXOG,EXOG,EXOG,EXOG,EXOG	rs1858740,rs79834959,rs13064938,rs35091896,rs1002675,rs6808093,rs762318,rs2070489,rs13097628,rs4679053,rs4679053,.,rs72284153,rs2300669,rs2300669,rs2300669,rs2300669,rs9838792,rs4371464,rs4371464,rs4371464,rs4371464,rs4371464,rs4371464,rs4371464,rs6599207,rs11273215,.,rs34367804,rs7647657	0.852598,0.845494,0.859947,0.995521,0.96965,0.880259,0.895503,0.864128,0.956259,0.950339,0.950339,0.951146,0.950048,0.863207,0.863207,0.863207,0.863207,0.826701,0.826736,0.826736,0.826736,0.826736,0.826736,0.826736,0.826736,0.82746,0.924931,0.826561,0.802447,0.825066	-0.357654,0.281234,-0.504,0.175927,0.187188,-0.515,-0.200696,-0.428403,0.225,0.393199,0.398437,0.32134,0.32134,0.349314,0.382061,0.40034,-0.40951768100033,0.344914,0.443701,0.371425,0.202371,0.417551,0.347725,0.464393,0.512355,0.40655,0.5602,0.159197,0.159197,0.82129	6.32816622135667e-13,1.83154e-10,0,4.87504e-13,2.05033e-12,1.521e-18,2.55548e-10,1.88893e-11,2.78e-07,1.36692817838996e-15,9.48979528391254e-18,2.34175598157149e-10,2.34175598157149e-10,4.65046e-11,4.46309e-17,8.70017e-10,3.35e-07,1.1968e-20,1.83196e-16,2.34089e-11,4.09182e-11,4.59746e-10,4.59903e-11,4.8204e-14,5.76751e-13,2.05965e-50,4.75923e-16,9.3522e-10,9.3522e-10,6.25e-35	B_cells,Liver,lung,Colon_Transverse,Thyroid,white_blood_cells,Nerve_Tibial,Brain_Putamen_basal_ganglia,lung,B_cells,T_helper_cells,T_killer_cells,T_killer_cells,Brain_Cerebellum,Pancreas,Adrenal_Gland,liver,Testis,Brain_Cerebellum,Brain_Cerebellar_Hemisphere,Adipose_Subcutaneous,Brain_Cortex,Brain_Hypothalamus,Brain_Caudate_basal_ganglia,Brain_Spinal_cord_cervical_c-1,Thyroid,Ovary,Skin_Not_Sun_E…	dcceqtl_B_cells,gtceqtl,lung_ceqtl,gtceqtl,gtceqtl,white_blood_cells_ceqtl,gtceqtl,gtceqtl,lung_ceqtl,dcceqtl_B_cells,dcceqtl_T_helper_cells,dcceqtl_T_killer_cells,dcceqtl_T_killer_cells,gtceqtl,gtceqtl,gtceqtl,liver_ceqtl,gtceqtl,gtceqtl,gtceqtl,gtceqtl,gtceqtl,gtceqtl,gtceqtl,gtceqtl,gtceqtl,gtceqtl,gtceqtl,gtceqtl,eyeceqtl	EXOG		-0.0316	1.05e-09	0.0052	0.00117	-0.03483	0.01073
chr17	7668434	rs78378222	G	T	TP53	TP53,ATP1B2,WRAP53,SHBG,EFNB3,SAT2	1.83	1.22	LOW	2.38e-09	3_prime_UTR_variant	NM_000546.6:c.*1175A>C,NM_001126112.3:c.*1175A>C,NM_001126113.3:c.*1376A>C,NM_001126114.3:c.*1464A>C,NM_001126115.2:c.*1175A>C,NM_001126116.2:c.*1464A>C,NM_001126117.2:c.*1376A>C,NM_001126118.2:c.*1175A>C,NM_001276695.3:c.*1376A>C,NM_001276696.3:c.*1464A>C,NM_001276697.3:c.*1175A>C,NM_001276698.3:c.*1464A>C,NM_001276699.3:c.*1376A>C,NM_001276760.3:c.*1175A>C,NM_001276761.3:c.*1175A>C		.	.	.			2	OLINK: FLT3LG,EDA2R	OLINK: FLT3LG,EDA2R	OLINK: 1,1	OLINK: rs78378222,rs78378222		1	TP53	rs78378222	1	-0.0664132	9.27184e-10	Artery_Tibial	TP53		7	TP53,TP53,TP53,TP53,TP53,TP53,TP53	rs78378222,rs78378222,rs78378222,rs78378222,rs78378222,rs78378222,rs78378222	1,1,1,1,1,1,1	-0.581091,0.547907587412701,-0.562542,1.531108,1.562112,1.489175,-0.765786	2.05198e-10,2.33839142403259e-41,3.00426e-11,4.99383726415065e-12,5.43039824683599e-13,7.47500072609085e-11,8.68606e-10	Skin_Not_Sun_Exposed_Suprapubic,blood,Skin_Sun_Exposed_Lower_leg,T_killer_cells,Monocytes,T_helper_cells,Adipose_Subcutaneous	gtceqtl,dcceqtl_blood,gtceqtl,dcceqtl_T_killer_cells,dcceqtl_Monocytes,dcceqtl_T_helper_cells,gtceqtl	TP53		0.0759	0.00069	0.0224	0.00309	0.11541	0.03901
chr1	201047168	rs3850625	A	G	CACNA1S	CACNA1S,KIF21B,ASCL5,MROH3P,TMEM9,INAVA	8.85	11.84	MODERATE	2.62e-08	missense_variant	NP_000060.2:p.Arg1539Cys		CACNA1S	1	rs3850625			4	OLINK: LRRN1,MYL3,MYBPC1,MYOM3	OLINK: LRRN1,MYL3,MYBPC1,MYOM3	OLINK: 1,1,1,1	OLINK: rs3850625,rs3850625,rs3850625,rs3850625		.	.	.	.	.	.	.	.		.	.	.	.	.	.	.	.	.		-0.0529	8.67e-11	0.0081	0.000724	-0.06194	0.01832
chr3	197289341	rs56319334†	TACACACACACACACAC	TACACACAC	DLG1	DLG1,MIR4797,DLG1-AS1,LINC02012,BDH1,MELTF	29.64	26.58	LOWEST	3.97e-10	intron_variant	NM_001098424.1:c.152-6504_152-6497dup		.	.	.		.	.	.	.	.	.		.	.	.	.	.	.	.	.		.	.	.	.	.	.	.	.	.		0.0382	4.56e-11	0.0058	4.74e-07	0.05818	0.01155
chr17	63927378	rs144724110†	GTAAA	G	CD79B	CD79B,GH1,SCN4A,CSHL1,CSH1,GH2	55.08	54.76	LOW	2.38e-09	downstream_gene_variant	.		.	.	.		.	.	.	.	.	.		.	.	.	.	.	.	.	.		.	.	.	.	.	.	.	.	.		0.0091	0.0269	0.0041	0.976	-0.00038	0.00588
chr19	9873796	rs71188848†	ATTTT	ATTTTTTTTTT	OLFM2	OLFM2,PIN1,UBL5,FBXL12,LOC100505555,COL5A3	21.21	23.81	LOWEST	3.97e-10	intron_variant	NM_001304347.2:c.136-13008_136-13003del,NM_058164.4:c.64-13008_64-13003del		.	.	.		.	.	.	.	.	.		.	.	.	.	.	.	.	.		.	.	.	.	.	.	.	.	.		0.0325	9.1e-08	0.0061	0.00573	0.03596	0.01302
chr10	68199485	rs7079481†	!A	A	MYPN	MYPN,ATOH7,PBLD,HERC4,HNRNPH3,RUFY2	48.55	50.24	MODERATE	2.62e-08	missense_variant	NP_001243196.1:p.Pro1135Thr,NP_001243197.1:p.Pro841Thr,NP_115967.2:p.Pro1135Thr		MYPN,MYPN,MYPN,MYPN	0.900232,0.989267,0.989597,1	rs10823148,rs10997975,rs7916821,rs7079481			6	OLINK: MYBPC1,MYBPC2,MYLPF,MB,MYOM3,FABP3	OLINK: MYBPC1,MYBPC2,MYLPF,MB,MYOM3,FABP3	OLINK: 0.893016,0.995817,0.999715,0.993666,0.992011,0.999504	OLINK: rs545519136,rs55719244,rs34524918,rs12416503,chr10:68203741,rs138792115,rs56096764,rs7475348		.	.	.	.	.	.	.	.		1	MYPN	rs12358937	0.902259	0.568422	2.12727e-22	Testis	gtceqtl	MYPN		0.0203	7.37e-05	0.0051	0.00869	0.02749	0.01048
chr2	175399012	rs7585693†	G	A	.	ATP5MC3,ATF2,MIR933,CHN1,LNPK,CHRNA1	20.53	21.04	LOWEST	1.19e-09	regulatory_region_variant	.		.	.	.		.	.	.	.	.	.		.	.	.	.	.	.	.	.		.	.	.	.	.	.	.	.	.		0.0201	0.00156	0.0064	0.585	0.00715	0.01311
chr3	12117794	rs160208†	!A	A	SYN2	SYN2,TIMP4,PPARG,TAMM41,TSEN2,VGLL4	12.53	13.9	LOWEST	3.97e-10	intron_variant	NM_003178.6:c.378-22857G>A,NM_133625.6:c.378-22857G>A		.	.	.		.	.	.	.	.	.		.	.	.	.	.	.	.	.		.	.	.	.	.	.	.	.	.		0.0428	1.25e-08	0.0075	4.33e-05	0.06514	0.01593
chr15	83927972	chr15:83927972†	!ATT	ATT	ADAMTSL3	ADAMTSL3,EFL1P1,DNM1P41,UBE2Q2L,LOC440300,GOLGA2P7	24.55	30.36	VEP_failed	1.19e-09	VEP_failed	NM_001301110.2:c.2117+3941_2117+3942insT,NM_001301110.2:c.2117+3941del,NM_001301110.2:c.2117+3950_2117+3951del,NM_001301110.2:c.2117+3950_2117+3951dup,NM_001301110.2:c.2117+3951dup,NM_207517.3:c.2117+3941_2117+3942insT,NM_207517.3:c.2117+3941del,NM_207517.3:c.2117+3950_2117+3951del,NM_207517.3:c.2117+3950_2117+3951dup,NM_207517.3:c.2117+3951dup		.	.	.		.	.	.	.	.	.		.	.	.	.	.	.	.	.		.	.	.	.	.	.	.	.	.		-0.0273	1.43e-06	0.0057	0.215	-0.01525	0.0123
chr22	41639667	rs71184825†	CTTTTTTTTTTTT	C	XRCC6	XRCC6,DESI1,SNU13,C22orf46,PMM1,MEI1	71.67	71.28	LOWEST	3.97e-10	intron_variant	NM_001288976.2:c.773+1878_773+1889dup,NM_001288977.2:c.650+1878_650+1889dup,NM_001288978.2:c.623+1878_623+1889dup,NM_001469.5:c.773+1878_773+1889dup		.	.	.		.	.	.	.	.	.		.	.	.	.	.	.	.	.		.	.	.	.	.	.	.	.	.		0.0366	1.6e-10	0.0057	0.112	0.0192	0.01208
chr9	95477448	rs28448271†	A	G	PTCH1	PTCH1,LOC100507346,FANCC,AOPEP,ERCC6L2-AS1,MIR3074	13.15	9.58	LOW	2.38e-09	downstream_gene_variant	.		.	.	.		.	.	.	.	.	.		.	.	.	.	.	.	.	.		13	PTCH1,PTCH1,PTCH1,PTCH1,PTCH1,PTCH1,PTCH1,PTCH1,PTCH1,PTCH1,PTCH1,PTCH1,PTCH1	rs59925771,rs28457693,rs28377268,rs28377268,rs28377268,rs59015093,rs16909898,rs28372566,rs2282041,rs10512249,.,rs772121315,rs145965565	0.955657,0.827866,0.813437,0.813437,0.813437,0.921785,0.999785,0.922576,0.922933,0.994494,0.945614,0.945402,0.94541	35.3051,0.694656,0.577398471156713,1.148213,0.197,0.166011,-1.146,0.389374,-0.493365,-0.122274,0.854115,0.854115,0.393326	4.9214e-273,5.50860570982621e-27,0,2.00565152913604e-83,4.75e-10,1.50937e-10,8.229e-22,3.76768717211169e-08,9.19e-08,3.446e-12,4.99357e-19,4.99357e-19,6.43141e-15	blood,T_helper_cells,blood,B_cells,CD4_NC,Whole_Blood,white_blood_cells,T_killer_cells,STARNET_Artery_ITA_(no_AS),LCL,Spleen,Spleen,Cells_Cultured_fibroblasts	eqtlgen,dcceqtl_T_helper_cells,dcceqtl_blood,dcceqtl_B_cells,ss_onek1k_ceqtl,gtceqtl,white_blood_cells_ceqtl,dcceqtl_T_killer_cells,star_ceqtl,grundb_adi_lcl_skin_ceqtl,gtceqtl,gtceqtl,gtceqtl	PTCH1		0.0139	0.1	0.0085	0.72	0.00565	0.01576
chr22	29927939	rs764629136†	GTTTT	G	MTMR3	MTMR3,MIR6818,HORMAD2-AS1,ASCC2,HORMAD2,UQCR10	25.32	29.11	LOWEST	3.97e-10	intron_variant	NM_021090.4:c.-137-29081_-137-29078dup,NM_153050.3:c.-137-29081_-137-29078dup,NM_153051.3:c.-137-29081_-137-29078dup		.	.	.		.	.	.	.	.	.		.	.	.	.	.	.	.	.		.	.	.	.	.	.	.	.	.		-0.0369	9.16e-11	0.0057	0.000148	-0.04632	0.01221
chr5	68748240	chr5:68748240†	!A	A	.	LINC02198,SLC30A5,SNORA50D,CCNB1,CENPH,PIK3R1	7.94	8.79	VEP_failed	1.19e-09	VEP_failed	.		.	.	.		.	.	.	.	.	.		.	.	.	.	.	.	.	.		.	.	.	.	.	.	.	.	.		-0.0507	2.77e-08	0.0091	0.0591	-0.03709	0.01965
chr6	31642909	rs1052486†	G	A	BAG6	BAG6,PRRC2A,MIR6832,APOM,C6orf47,GPANK1	43.69	47.34	MODERATE	2.62e-08	missense_variant	NP_001092004.1:p.Ser619Pro		BAG6	1	rs1052486		.	.	.	.	.	.		1	BAG6	rs2077492	0.993483	0.0304743	2.03855e-10	Testis	BAG6		7	BAG6,AIF1,PRRC2A,PRRC2A,BAG6,BAG6,CSNK2B	rs2736155,rs2077491,rs2077491,rs2077491,rs36173461,rs36173461,rs36173461	0.991606,0.993483,0.993483,0.993483,0.999317,0.999317,0.999317	0.510275,0.644951,-0.249874,-0.323223,0.319195,0.391718,-0.467178	1.84441e-79,1.0069399709642e-49,2.05182378672222e-07,6.60612704749708e-11,3.777e-22,4.76183e-12,4.18663707723456e-21	Artery_Tibial,T_helper_cells,T_helper_cells,T_killer_cells,Artery_Aorta,Artery_Coronary,Neutrophile	gtceqtl,dcceqtl_T_helper_cells,dcceqtl_T_helper_cells,dcceqtl_T_killer_cells,gtceqtl,gtceqtl,dcceqtl_Neutrophile	BAG6		-0.0165	0.00127	0.0051	0.546	-0.0064	0.0106
chr3	12263625	rs1033432331†	A	T	.	PPARG,SYN2,TIMP4,TSEN2,MKRN2OS,MKRN2	10.5	11.84	LOWEST	1.19e-09	intergenic_variant	.		.	.	.		.	.	.	.	.	.		.	.	.	.	.	.	.	.		.	.	.	.	.	.	.	.	.		0.0457	1.54e-08	0.0081	4.57e-05	0.06947	0.01704
chrX	8938654	rs111386834†	C	T	.	FAM9B,FAM9A,ANOS1,VCX3B,TBL1X,VCX2	22.88	26.64	LOWEST	1.19e-09	intergenic_variant	.		.	.	.			1	OLINK: PROK1	OLINK: PROK1	OLINK: 1	OLINK: rs111386834		.	.	.	.	.	.	.	.		.	.	.	.	.	.	.	.	.		0.0316	1.33e-10	0.0049	0.000707	0.03897	0.01151
chrX	69161944	rs5937160†	T	C	PJA1	PJA1,LINC00269,EFNB1,NALF2,STARD8,EDA	20.55	23.89	MODERATE	2.62e-08	missense_variant	NP_001027568.1:p.Ser377Asn,NP_001369704.1:p.Ser432Asn,NP_001369705.1:p.Ser377Asn,NP_071763.2:p.Ser244Asn,NP_660095.1:p.Ser432Asn		PJA1,PJA1	0.999395,1	rs11539157,rs5937160		.	.	.	.	.	.		.	.	.	.	.	.	.	.		.	.	.	.	.	.	.	.	.		-0.026	5.28e-07	0.0052	0.138	-0.01807	0.01218
chr8	38268841	rs1149†	C	G	PLPP5	DDHD2,PLPP5,NSD3,BAG4,LSM1,LETM2	28.3	24.92	MODERATE	2.62e-08	missense_variant	NP_001341383.1:p.Pro75Arg		DDHD2,PLPP5	0.854127,1	rs2306899,rs1149		OLINK: DDHD2	0		OLINK: DDHD2	OLINK: 0.854127	OLINK: rs2306899		35	PLPP5,PLPP5,FGFR1,PLPP5,PLPP5,PLPP5,PLPP5,FGFR1,FGFR1,FGFR1,PLPP5,PLPP5,PLPP5,PLPP5,PLPP5,PLPP5,PLPP5,FGFR1,FGFR1,FGFR1,FGFR1,FGFR1,FGFR1,FGFR1,FGFR1,FGFR1,FGFR1,FGFR1,FGFR1,FGFR1,FGFR1,FGFR1,FGFR1,FGFR1,FGFR1	rs16887275,rs6981405,rs9198,rs3830326,rs3830326,rs1149,rs1149,rs1906672,rs1906672,rs1906672,rs7845284,.,rs7823681,rs28439472,rs59256436,rs56322953,rs10958683,rs3779921,rs2304000,rs2304000,rs2304000,rs2304000,rs2304000,rs2304000,rs2304000,rs2304000,rs2304000,rs2304000,rs2304000,rs2304000,rs4647907,rs16887377,rs17175814,rs2411257,rs10958700	0.854578,0.890795,0.995557,0.995679,0.995679,1,1,0.873422,0.873422,0.873422,0.995354,0.995475,0.995435,0.993466,0.991397,0.994953,0.863564,0.843918,0.810757,0.810757,0.810757,0.810757,0.810757,0.810757,0.810757,0.810757,0.810757,0.810757,0.810757,0.810757,0.810732,0.80899,0.809667,0.907484,0.884036	-0.0404587,0.0191198,-0.0385267,-0.0484707,0.0315593,-0.0266996,-0.0521891,-0.0547039,-0.0748886,-0.0330699,-0.06803,-0.0244926,-0.0244926,-0.0549361,-0.0326602,-0.0350505,-0.0281774,-0.0383478,-0.0385477,-0.0323408,-0.0274524,-0.0333723,-0.0344855,-0.0552332,-0.0396871,-0.0343043,-0.0740271,-0.0538315,-0.0533906,-0.0725672,-0.0569477,-0.053393,-0.0388046,-0.02483,-0.0311942	1.11485e-15,3.14163e-11,6.59172e-13,3.9453e-23,8.51821e-13,1.38429e-20,1.56791e-22,5.70959e-12,6.76006e-16,8.10542e-24,2.94262e-19,8.09653e-13,8.09653e-13,1.07741e-11,1.14246e-19,2.78755e-10,6.75974e-10,6.76925e-18,1.16096e-18,1.17703e-30,1.26119e-21,1.598e-13,1.8005e-23,1.86948e-23,2.0269e-28,2.05512e-30,2.50774e-14,2.67026e-26,3.6541e-28,9.37402e-10,2.97547e-12,2.96099e-10,1.02061e-26,6.12669e-…	Stomach,Artery_Tibial,Testis,Esophagus_Gastroesophageal_Junction,Artery_Aorta,Thyroid,Pancreas,Prostate,Brain_Cerebellum,Lung,Prostate,Esophagus_Mucosa,Esophagus_Mucosa,Pituitary,Esophagus_Muscularis,Testis,Colon_Transverse,Breast_Mammary_Tissue,Artery_Aorta,Artery_Tibial,Adipose_Subcutaneous,Colon_Transverse,Cells_Cultured_fibroblasts,Pancreas,Adipose_Visceral_Omentum,Nerve_Tibial,Ovary,Esophagu…	FGFR1		40	DDHD2,DDHD2,DDHD2,DDHD2,DDHD2,DDHD2,DDHD2,DDHD2,DDHD2,DDHD2,DDHD2,DDHD2,DDHD2,DDHD2,DDHD2,DDHD2,NSD3,DDHD2,DDHD2,DDHD2,LSM1,DDHD2,DDHD2,NSD3,PLPP5,DDHD2,DDHD2,DDHD2,DDHD2,DDHD2,PLPP5,NSD3,NSD3,DDHD2,PLPP5,PLPP5,PLPP5,DDHD2,DDHD2,LSM1	rs2306899,rs2306899,rs2306899,rs6992943,rs6992943,rs10103315,rs10103315,rs16887273,rs16887273,rs16887273,rs16887273,rs16887273,rs16887275,rs16887275,rs16887275,rs16887277,rs200081964,rs10958567,rs10958567,rs10958567,rs10958567,.,rs76331678,rs1149,rs1149,rs3739252,rs3824289,rs1488934,rs1488934,rs7837189,rs34703236,rs2234555,rs112731738,rs12678205,rs56322953,rs112537273,rs7816998,rs2293971,rs464790…	0.854127,0.854127,0.854127,0.854236,0.854236,0.854578,0.854578,0.85442,0.85442,0.85442,0.85442,0.85442,0.854578,0.854578,0.854578,0.854265,0.854176,0.854458,0.854458,0.854458,0.854458,0.841219,0.848656,1,1,0.994915,0.869374,0.88791,0.88791,0.890745,0.995354,0.890643,0.890456,0.995388,0.994953,0.868456,0.868544,0.84392,0.810732,0.900931	0.472686,0.225646,23.0983,0.328292,0.288791639506454,0.40384,0.281586,0.258924,0.232278,0.345159,0.338511,0.345051,0.358209,0.352681,0.154624,0.60025,-0.282466,0.204655,0.408622,0.254954,-0.0723406,0.483353,0.483353,-0.277,0.212760447633015,0.21823,-0.425,0.342845,-0.179286,0.505036,0.193238,-19.4402,-0.285363388042219,-0.444,0.686625,6.1318,0.596033,0.191,0.467223,-0.531	1.32602e-21,1.35205e-12,4.8269e-118,2.34591e-14,4.33370746714935e-134,1.23981e-15,1.9478e-23,1.12479e-12,2.17421e-17,2.25583e-20,6.11261e-22,7.96677e-25,1.24356e-34,1.40023e-20,5.93431e-11,7.42021e-29,3.24530908269723e-07,2.55929e-12,4.76963e-29,7.34929e-35,4.678e-09,2.74363727045533e-18,2.74363727045533e-18,1.5e-06,1.6280864279854e-69,8.17861e-24,2.081e-09,7.97886e-12,9.818e-26,2.038e-22,2.53501…	Spleen,Esophagus_Mucosa,blood,Brain_Cerebellum,blood,Pituitary,Esophagus_Muscularis,Brain_Cerebellar_Hemisphere,Heart_Left_Ventricle,Colon_Sigmoid,Heart_Atrial_Appendage,Artery_Aorta,Thyroid,Esophagus_Gastroesophageal_Junction,Artery_Tibial,Prostate,adipose,Adipose_Visceral_Omentum,Pancreas,Nerve_Tibial,LCL,T_killer_cells,T_killer_cells,lung,blood,Colon_Transverse,white_blood_cells,Small_Intestin…	gtceqtl,gtceqtl,eqtlgen,gtceqtl,dcceqtl_blood,gtceqtl,gtceqtl,gtceqtl,gtceqtl,gtceqtl,gtceqtl,gtceqtl,gtceqtl,gtceqtl,gtceqtl,gtceqtl,dcceqtl_adipose,gtceqtl,gtceqtl,gtceqtl,grundb_adi_lcl_skin_ceqtl,dcceqtl_T_killer_cells,dcceqtl_T_killer_cells,lung_ceqtl,dcceqtl_blood,gtceqtl,white_blood_cells_ceqtl,gtceqtl,grundb_adi_lcl_skin_ceqtl,gtceqtl,gtceqtl,eqtlgen,dcceqtl_blood,lung_ceqtl,gtceqtl,eqtlg…	DDHD2		-0.0092	0.117	0.0059	0.643	0.00546	0.01176
chr1	149934520	rs11205303	C	T	MTMR11	MTMR11,OTUD7B,SF3B4,SV2A,BOLA1,H2AC21	41.02	40.71	MODERATE	2.62e-08	missense_variant	NP_001139334.1:p.Met159Val,NP_870988.2:p.Met87Val		MTMR11	1	rs11205303			1	OLINK: PSPN	OLINK: PSPN	OLINK: 0.948163	OLINK: rs67807996		.	.	.	.	.	.	.	.		.	.	.	.	.	.	.	.	.		-0.0223	2.12e-05	0.0053	0.0341	-0.02278	0.01075
chr8	115613480	rs2737215†	!T	T	TRPS1	TRPS1,LINC00536	42.64	44.05	LOWEST	1.19e-09	intron_variant	NM_001282902.3:c.939+5652G>A,NM_001282903.3:c.945+5652G>A,NM_001330599.2:c.927+5652G>A,NM_014112.5:c.966+5652G>A		.	.	.			5	SomaScan: GPNMB; OLINK: LEPR,CD1C,NCAN,TNFSF11	SomaScan: GPNMB; OLINK: LEPR,CD1C,NCAN,TNFSF11	SomaScan: 0.939665; OLINK: 0.914369,0.915485,0.9587,0.949023	SomaScan: rs550301440,rs72238288,rs767678727; OLINK: rs33977272,rs398009477,rs13271228,rs2737205,rs2737212		1	TRPS1	rs2737217	0.973264	-0.022955	2.55412e-14	Cells_Cultured_fibroblasts	TRPS1		1	TRPS1	rs2737203	0.956509	na	3.75e-18	LIV	blood_vasc_metab_ceqtl	TRPS1		0.0048	0.353	0.0052	0.554	0.00621	0.01051
chr2	218835276	rs78058190†	A	G	PRKAG3	PRKAG3,MIR9500,CYP27A1,WNT6,WNT10A,LINC01494	8.97	5.22	LOW	2.38e-09	upstream_gene_variant	.		.	.	.			12	SomaScan: SLC5A8,KCNMB3,WNT5A,CPB1,PLAT,CDH5,TIMP4; OLINK: LPL,DSG2,CD300LG,TIMP4,CDH5,MYOC,PNLIP	SomaScan: SLC5A8,KCNMB3,WNT5A,CPB1,PLAT,CDH5,TIMP4; OLINK: LPL,DSG2,CD300LG,TIMP4,CDH5,MYOC,PNLIP	SomaScan: 1,1,0.88061,0.88061,0.88061,0.88061,0.88061; OLINK: 1,1,1,1,0.88061,0.88061,0.88061	SomaScan: rs78058190,rs78058190,rs200513066,rs200513066,rs200513066,rs200513066,rs200513066; OLINK: rs78058190,rs78058190,rs78058190,rs78058190,rs200513066,rs200513066,rs200513066		.	.	.	.	.	.	.	.		12	WNT6,WNT6,WNT6,WNT6,WNT6,WNT6,WNT6,WNT6,WNT6,WNT6,WNT6,WNT6	rs200513066,rs200513066,rs200513066,rs200513066,rs200513066,rs200513066,rs200513066,rs200513066,rs200513066,rs200513066,rs200513066,rs200513066	0.88061,0.88061,0.88061,0.88061,0.88061,0.88061,0.88061,0.88061,0.88061,0.88061,0.88061,0.88061	1.43663,0.830543,0.624069,0.771461,0.854207,1.09051,1.13658,0.901181,1.25071,0.677839,0.505822,0.631094	1.10467e-61,1.16743e-18,1.22008e-16,1.36344e-26,1.37099e-28,1.74833e-53,2.13802e-29,2.59739e-11,4.15361e-46,4.58079e-20,5.05522e-10,6.87776e-19	Muscle_Skeletal,Breast_Mammary_Tissue,Skin_Not_Sun_Exposed_Suprapubic,Skin_Sun_Exposed_Lower_leg,Adipose_Visceral_Omentum,Adipose_Subcutaneous,Heart_Left_Ventricle,Pancreas,Thyroid,Artery_Tibial,Esophagus_Mucosa,Esophagus_Muscularis	gtceqtl,gtceqtl,gtceqtl,gtceqtl,gtceqtl,gtceqtl,gtceqtl,gtceqtl,gtceqtl,gtceqtl,gtceqtl,gtceqtl	WNT6		0.0407	0.000184	0.0109	0.00326	0.05498	0.01868
chr10	102910040	rs1160584512†	CAAAAAAAAA	CAAAAAAAAAAAAAAAAA	.	LOC107984265,BORCS7-ASMT,AS3MT,CNNM2,BORCS7,CYP17A1	7.34	7.39	MODERATE	2.62e-08	TFBS_ablation	.		.	.	.		.	.	.	.	.	.		.	.	.	.	.	.	.	.		.	.	.	.	.	.	.	.	.		0.0206	0.0351	0.0098	0.16	0.02824	0.02009
chr5	83519351	rs61749613	G	A	VCAN	VCAN,VCAN-AS1,HAPLN1,XRCC4,EDIL3,TMEM167A	5.21	4.08	MODERATE	2.62e-08	missense_variant,splice_region_variant	NP_001157570.1:p.Lys349Glu,NP_004376.2:p.Lys349Glu		VCAN	1	rs61749613			1	OLINK: ADGRG2	OLINK: ADGRG2	OLINK: 1	OLINK: rs61749613		2	VCAN,VCAN	rs34580448,rs115912456	0.99666,1	0.0719,0.0617721	4.43494e-11,1.18434e-15	Artery_Aorta,Cells_Cultured_fibroblasts	VCAN		1	VCAN	rs115912456	1	0.337706036997339	1.45743073715458e-42	blood	dcceqtl_blood	VCAN		0.0515	3.71e-05	0.0125	0.0271	0.05253	0.02377
chr19	7189364	rs2860183†	!C	C	INSR	INSR,ZNF557,MBD3L3,MBD3L2,MBD3L4,MBD3L5	33.91	37.78	LOWEST	1.19e-09	intron_variant	NM_000208.4:c.653-4727A>G,NM_001079817.3:c.653-4727A>G		.	.	.		.	.	.	.	.	.		.	.	.	.	.	.	.	.		.	.	.	.	.	.	.	.	.		0.0326	8.72e-10	0.0053	3.67e-06	0.05102	0.01102
chr12	54028720	rs144307645†	T	C	HOXC6	HOXC6,HOXC5,HOXC4,MIR615,HOXC8,HOXC9	1.24	1.8	MODERATE	2.62e-08	missense_variant	NP_004494.1:p.Arg67Trp		HOXC6	1	rs144307645		.	.	.	.	.	.		.	.	.	.	.	.	.	.		.	.	.	.	.	.	.	.	.		-0.1179	3e-09	0.0199	0.000263	-0.17058	0.04674
chr5	103003035	rs78408340	G	C	PAM	PAM,GIN1,PPIP5K2,MACIR,LINC00491,LINC00492	0.67	0.97	MODERATE	2.62e-08	missense_variant,splice_region_variant	NP_000910.2:p.Ser539Trp,NP_001170777.1:p.Ser539Trp,NP_001306872.1:p.Ser557Trp,NP_001351511.1:p.Ser539Trp,NP_001351512.1:p.Ser539Trp,NP_001351513.1:p.Ser539Trp,NP_001351514.1:p.Ser539Trp,NP_001351515.1:p.Ser432Trp,NP_001351516.1:p.Ser432Trp,NP_001351517.1:p.Ser432Trp,NP_001351518.1:p.Ser432Trp,NP_001351519.1:p.Ser463Trp,NP_001351520.1:p.Ser450Trp,NP_001351521.1:p.Ser450Trp,NP_001351522.1:p.Ser432T…		PAM	1	rs78408340		.	.	.	.	.	.		.	.	.	.	.	.	.	.		.	.	.	.	.	.	.	.	.		-0.1536	6.58e-09	0.0265	0.0131	-0.16079	0.06481
chr1	160191011	rs150330307†	C	T	CASQ1	CASQ1,ATP1A4,LOC729867,PEA15,DCAF8,ATP1A2	4.46	3.22	MODERATE	2.62e-08	missense_variant	NP_001222.3:p.Met87Thr		CASQ1	1	rs150330307		.	.	.	.	.	.		.	.	.	.	.	.	.	.		.	.	.	.	.	.	.	.	.		-0.0784	2.36e-08	0.014	2e-05	-0.10958	0.0257
chr3	11999743	rs2600232†	!C	C	SYN2	SYN2,TAMM41,TIMP4,VGLL4,PPARG,ATG7	11.27	10.94	LOW	2.38e-09	upstream_gene_variant	.		SYN2,SYN2,SYN2	0.991585,0.991585,0.991585	rs1333519826,rs1333519826,rs1333519826		.	.	.	.	.	.		.	.	.	.	.	.	.	.		5	TIMP4,SYN2,TIMP4,SYN2,TIMP4	rs305506,rs2600231,rs160212,rs308965,rs308953	0.990706,1,0.883459,0.88337,0.877937	-0.373327,-0.964874,-0.751982,-0.878666,-0.748811	1.21535e-12,1.48314e-19,2.52164e-43,2.58427e-43,6.59418e-10	Artery_Aorta,Spleen,Artery_Tibial,Artery_Tibial,Brain_Hypothalamus	gtceqtl,gtceqtl,gtceqtl,gtceqtl,gtceqtl	TIMP4		0.0442	8.43e-08	0.0082	0.00327	0.04914	0.01671
chr12	3258594	rs11062595†	G	C	TSPAN9	TSPAN9,LOC100128253,LINC02417,PRMT8,TEAD4,THCAT155	10	9.12	LOWEST	3.97e-10	intron_variant	NM_001168320.2:c.64-19827C>G,NM_006675.5:c.64-19827C>G		.	.	.		.	.	.	.	.	.		.	.	.	.	.	.	.	.		.	.	.	.	.	.	.	.	.		0.0362	3.8e-05	0.0088	0.00343	0.05121	0.0175
chr6	34222327	rs75104038†	A	G	.	HMGA1,MIR6835,SMIM29,NUDT3,RPS10-NUDT3,GRM4	4.03	6.14	LOWEST	3.97e-10	intergenic_variant	.		HMGA1	0.864402	rs41269028		.	.	.	.	.	.		.	.	.	.	.	.	.	.		.	.	.	.	.	.	.	.	.		0.0258	0.0204	0.0111	0.037	0.05629	0.02698
chr19	33396499	rs7250869†	!C	C	PEPD	PEPD,CEBPG,CEBPA-DT,CEBPA,SLC7A10,LRP3	27.98	31.03	LOWEST	3.97e-10	intron_variant	NM_000285.4:c.968-5020A>G,NM_001166056.2:c.845-5020A>G,NM_001166057.2:c.776-5020A>G		.	.	.			5	SomaScan: ADIPOQ; OLINK: CKB,IGFBP2,RET,ADIPOQ,ENO3	SomaScan: ADIPOQ; OLINK: CKB,IGFBP2,RET,ADIPOQ,ENO3	SomaScan: 0.884405; OLINK: 1,0.905335,0.905335,0.884807,0.872259	SomaScan: rs731839; OLINK: rs7250869,rs62102718,rs62102718,rs10422861,rs8103728		.	.	.	.	.	.	.	.		.	.	.	.	.	.	.	.	.		0.0354	2.23e-10	0.0056	0.0223	0.02674	0.0117
chr3	12351626	rs1801282†	G	C	PPARG	PPARG,TSEN2,SYN2,MKRN2OS,TIMP4,MKRN2	11.9	12.03	MODERATE	2.62e-08	missense_variant	NP_001341597.1:p.Pro12Ala,NP_001361194.1:p.Pro12Ala,NP_056953.2:p.Pro12Ala		PPARG	1	rs1801282			4	SomaScan: FABP4,FABP3; OLINK: CD300LG,BPIFB2,FABP4	SomaScan: FABP4,FABP3; OLINK: CD300LG,BPIFB2,FABP4	SomaScan: 0.89068,0.89068; OLINK: 0.96174,0.998001,0.998118	SomaScan: rs200413701,rs71063818,rs200413701,rs71063818; OLINK: rs35408322,rs398051589,rs527620413,rs7610055,rs7647481		1	PPARG	rs1801282	1	0.0337814	4.16088e-13	Lung	PPARG		.	.	.	.	.	.	.	.	.		-0.023	0.00349	0.0079	0.122	-0.02504	0.01619
chr3	197148245	rs1300222676†	CAAAAAAAAAAAA	C	DLG1	DLG1,MELTF,MELTF-AS1,MIR4797,DLG1-AS1,PIGZ	26.16	25.94	LOWEST	3.97e-10	intron_variant	NM_001098424.1:c.636+1486_636+1497dup		.	.	.		.	.	.	.	.	.		.	.	.	.	.	.	.	.		.	.	.	.	.	.	.	.	.		0.0422	9.65e-13	0.0059	1.35e-06	0.05931	0.01227
chr19	18283739	rs10686842	!TAAA	TAAA	JUND	MIR3188,JUND,IQCN,LSM4,LOC729966,PDE4C	34.14	36.73	LOW	2.38e-09	upstream_gene_variant	.		.	.	.		SomaScan: JUND	2	OLINK: FNDC1,FLT3LG	SomaScan: JUND; OLINK: FNDC1,FLT3LG	SomaScan: 0.918733; OLINK: 0.966624,0.999927	SomaScan: rs11666808; OLINK: rs12608504,chr19:18283739		.	.	.	.	.	.	.	.		7	IQCN,IQCN,IQCN,IQCN,IQCN,IQCN,IQCN	rs12608504,rs143890393,rs12980403,rs11086102,rs10406080,rs10406080,rs10406080	0.966624,0.995643,0.999519,0.999355,0.969373,0.969373,0.969373	76.4147,-0.54066,0.801398822921356,-0.450007,-0.571715,-0.312444,-0.212059	3.27170000000001e-310,1.77875e-24,0,4.33961e-17,2.07498e-16,2.95839e-25,4.35759e-29	blood,Brain_Cerebellum,blood,Brain_Nucleus_accumbens_basal_ganglia,Brain_Cortex,Lung,Whole_Blood	eqtlgen,gtceqtl,dcceqtl_blood,gtceqtl,gtceqtl,gtceqtl,gtceqtl	IQCN		-0.0182	0.000669	0.0054	0.689	-0.00452	0.01128
chr12	123924955	rs7133378†	A	G	DNAH10	DNAH10,CCDC92,ZNF664,ZNF664-RFLNA,ATP6V0A2,TCTN2	31.53	31.78	LOWEST	3.97e-10	intron_variant	NM_001372106.1:c.11767-95G>A,NM_207437.3:c.11413-95G>A		CCDC92	0.909666	rs11057401			2	SomaScan: KCNMB3; OLINK: LYPD3	SomaScan: KCNMB3; OLINK: LYPD3	SomaScan: 0.879507; OLINK: 0.920007	SomaScan: rs11337740; OLINK: rs1882491		52	CCDC92,CCDC92,CCDC92,CCDC92,CCDC92,DNAH10,CCDC92,CCDC92,CCDC92,CCDC92,CCDC92,DNAH10,CCDC92,CCDC92,CCDC92,CCDC92,CCDC92,CCDC92,CCDC92,CCDC92,CCDC92,CCDC92,CCDC92,CCDC92,CCDC92,CCDC92,CCDC92,CCDC92,CCDC92,CCDC92,CCDC92,CCDC92,DNAH10,CCDC92,CCDC92,CCDC92,CCDC92,CCDC92,CCDC92,RFLNA,ZNF664,ZNF664-RFLNA,CCDC92,DNAH10,CCDC92,CCDC92,CCDC92,CCDC92,RFLNA,ZNF664,ZNF664-RFLNA,ZNF664	rs7301953,rs7301953,rs4575361,rs4930721,rs4930721,rs11057397,rs9863,rs4930722,rs4930722,rs4930722,rs4930723,rs4930723,rs11057400,rs11057400,rs11057400,rs11057400,rs11057400,rs11057400,rs11057400,rs4930725,rs3186071,rs3186071,rs3186071,rs3186071,rs3186071,rs3186071,rs3186071,rs3186071,rs3186071,rs34180676,rs34180676,rs7955815,rs7961449,rs11057407,rs4765127,rs12311114,rs12311114,rs76283024,rs762830…	0.920562,0.920562,0.910034,0.920561,0.920561,0.949817,0.815983,0.909283,0.909283,0.909283,0.95917,0.95917,0.909739,0.909739,0.909739,0.909739,0.909739,0.909739,0.909739,0.959159,0.909665,0.909665,0.909665,0.909665,0.909665,0.909665,0.909665,0.909665,0.909665,0.919936,0.919936,0.920008,0.959713,0.909631,0.964122,0.914654,0.914654,0.923407,0.923407,0.964659,0.964659,0.964659,0.920708,0.964083,0.963…	0.0294212,0.0765266,0.08414,0.0719538,0.109585,0.0770426,0.0563686,0.0770245,0.0524648,0.08609,0.0503459,0.0666615,0.10049,0.107533,0.0568919,0.0878215,0.0939686,0.102449,0.0924491,0.0723594,0.0635418,0.0770463,0.053372,0.066284,0.0480931,0.049652,0.0513743,0.0460997,0.0470326,0.0538894,0.0410828,0.0561755,0.0417252,0.0622322,0.0801468,0.0447866,0.062673,0.0854604,0.0352169,-0.0993098,-0.0993098,…	2.44841e-21,4.13828e-26,1.09558e-21,1.12108e-75,3.71109e-28,3.61431e-18,4.87247e-16,2.72116e-23,8.69769e-45,9.47879e-17,6.08453e-11,2.53109e-22,1.1138e-32,1.83673e-15,2.23933e-58,2.37127e-11,4.06465e-27,5.33282e-11,9.04282e-44,3.83074e-24,1.57637e-78,1.88823e-16,1.94098e-41,2.00281e-10,2.24228e-101,3.96632e-78,4.93924e-127,6.51315e-66,9.45727e-62,1.46881e-74,4.10426e-102,4.92981e-84,1.67558e-19,1…	Esophagus_Mucosa,Brain_Cerebellum,Brain_Cerebellar_Hemisphere,Testis,Brain_Anterior_cingulate_cortex_BA24,Brain_Cerebellar_Hemisphere,Adrenal_Gland,Brain_Nucleus_accumbens_basal_ganglia,Heart_Left_Ventricle,Brain_Putamen_basal_ganglia,Liver,Brain_Cerebellum,Brain_Frontal_Cortex_BA9,Brain_Spinal_cord_cervical_c-1,Breast_Mammary_Tissue,Brain_Amygdala,Brain_Hypothalamus,Brain_Substantia_nigra,Brain_…	CCDC92		31	DNAH10,ZNF664,ZNF664,ZNF664,DNAH10,CCDC92,CCDC92,CCDC92,CCDC92,CCDC92,CCDC92,CCDC92,ZNF664,CCDC92,CCDC92,DNAH10,CCDC92,CCDC92,CCDC92,CCDC92,DNAH10,CCDC92,ZNF664,ZNF664,ZNF664,ZNF664,CCDC92,DNAH10,ZNF664,ZNF664,ZNF664	rs12317176,rs12317176,rs7133378,rs7133378,rs10846580,rs4930706,rs9863,rs9863,rs4930722,rs4930722,rs4930722,rs4930724,rs4930724,rs35825716,rs4930726,rs4930726,rs4765335,rs4765335,rs4765335,rs4765335,rs11835839,rs2178663,rs4765219,rs7958691,rs12301673,rs76283024,rs7978610,rs7311969,rs77112003,.,rs12824567	0.960608,0.960608,1,1,0.960237,0.960532,0.815983,0.815983,0.909283,0.909283,0.909283,0.922908,0.922908,0.909053,0.959696,0.959696,0.920125,0.920125,0.920125,0.920125,0.96998,0.909557,0.958437,0.970029,0.969492,0.923407,0.963437,0.964887,0.921256,0.923147,0.923147	-0.503342,0.49779,-54.94884507,-54.94884507,-0.505773,0.236686,-0.542172,0.150729,0.358232,0.371627,0.437783,-0.336126,0.431,0.171246,-0.652806,-0.538619,0.266535,0.444104,0.134875,0.179298,0.178787,na,-0.307684251594244,-20.8709,0.784082,-0.298184,0.435296,-0.506575,0.197706,na,na	2.89e-15,1.89e-11,7e-12,7e-12,6.06e-15,5.03469e-22,2.41e-16,3.79554e-12,1.19734e-28,5.21812e-21,6.54538e-29,3.96e-07,1.091e-13,6.31049e-11,1.14e-25,5.36e-17,1.07795e-15,1.26073e-13,5.84549e-10,6.13611e-14,5.15506e-11,4.28e-23,1.35195008690973e-161,9.8257e-97,3.91511028166103e-47,6.93278e-23,3.94655e-14,6.92e-15,1.55197e-11,6.69e-13,6.69e-13	STARNET_Fat_subcutaneous,eye,blood,blood,STARNET_Artery_ITA_(no_AS),Breast_Mammary_Tissue,STARNET_Liver,Skin_Sun_Exposed_Lower_leg,Adipose_Visceral_Omentum,Nerve_Tibial,Heart_Left_Ventricle,STARNET_Muscle_skeletal,white_blood_cells,Artery_Tibial,STARNET_Fat_visceral,STARNET_Artery_aortic_root_(AS),Thyroid,Spleen,Muscle_Skeletal,Skin_Not_Sun_Exposed_Suprapubic,Testis,SF,blood,blood,adipose,Thyroid…	star_ceqtl,eyeceqtl,solomon_vsmc_ceqtl,solomon_vsmc_sqtl,star_ceqtl,gtceqtl,star_ceqtl,gtceqtl,gtceqtl,gtceqtl,gtceqtl,star_ceqtl,white_blood_cells_ceqtl,gtceqtl,star_ceqtl,star_ceqtl,gtceqtl,gtceqtl,gtceqtl,gtceqtl,gtceqtl,blood_vasc_metab_ceqtl,dcceqtl_blood,eqtlgen,dcceqtl_adipose,gtceqtl,gtceqtl,star_ceqtl,gtceqtl,blood_vasc_metab_ceqtl,blood_vasc_metab_ceqtl	ZNF664		-0.043	6.02e-15	0.0055	5.22e-06	-0.05178	0.01136
chr5	135028828	rs479632†	G	C	PITX1	PITX1,PITX1-AS1,EPIST,CATSPER3,PCBD2,TXNDC15	24.64	25.01	MODERATE	2.62e-08	missense_variant	NP_002644.4:p.Gly299Ala		PITX1	1	rs479632		.	.	.	.	.	.		.	.	.	.	.	.	.	.		2	PITX1,PITX1	rs39599,rs31198	0.998157,0.997683	-0.728075,-0.52185	1.40297e-39,3.13e-17	Testis,STARNET_Muscle_skeletal	gtceqtl,star_ceqtl	PITX1		-0.0137	0.0208	0.0059	0.151	-0.0177	0.01233
chr2	190060135	rs143242500†	G	A	MSTN	C2orf88,MSTN,HIBCH,PMS1,ORMDL1,INPP1	0.58	0.2	MODERATE	2.62e-08	missense_variant	NP_005250.1:p.Ile225Thr		MSTN	1	rs143242500		OLINK: MSTN	0		OLINK: MSTN	OLINK: 0.998559	OLINK: rs184868800		.	.	.	.	.	.	.	.		.	.	.	.	.	.	.	.	.		0.1292	0.00582	0.0469	0.0183	0.15608	0.06614
chr5	56512515	rs392794†	!T	T	.	C5orf67,LINC01948,LOC105378979,ANKRD55,MAP3K1,SETD9	26.18	25.36	LOWEST	1.19e-09	regulatory_region_variant	.		.	.	.			2	OLINK: C9,APOF	OLINK: C9,APOF	OLINK: 0.999957,0.999957	OLINK: rs256904,rs256904		.	.	.	.	.	.	.	.		2	RPL26P19,RPL26P19	rs30351,rs173964	0.956145,0.999957	0.473704,0.783930087640179	1.83319237224409e-15,0	adipose,blood	dcceqtl_adipose,dcceqtl_blood	RPL26P19		-0.0408	3.32e-12	0.0059	0.00725	-0.03201	0.01192
chr3	150348753	rs62271373†	A	T	.	LINC01214,TSC22D2,LINC01213,SERP1,LOC105374313,EIF2A	3.72	6.08	LOWEST	1.19e-09	regulatory_region_variant	.		.	.	.		.	.	.	.	.	.		.	.	.	.	.	.	.	.		.	.	.	.	.	.	.	.	.		0.062	4.71e-08	0.0113	2.02e-06	0.13292	0.02797
chr2	226187681	rs75806841†	!A	A	.	LOC646736,MIR5702,NYAP2,IRS1,RHBDD1,COL4A4	36.17	31.94	LOWEST	1.19e-09	TF_binding_site_variant	.		.	.	.			2	OLINK: IGSF9,TIMP4	OLINK: IGSF9,TIMP4	OLINK: 0.850188,0.841038	OLINK: rs2943645,rs2972137		.	.	.	.	.	.	.	.		4	IRS1,IRS1,IRS1,IRS1	rs3052047,rs1515104,rs2943646,rs1515110	0.847606,0.856307,0.849849,0.820909	-0.320739,0.563604,-0.225014,0.481898	3.83866e-17,1.29e-22,3.07525e-12,5.05488406551672e-20	Adipose_Subcutaneous,STARNET_Fat_subcutaneous,Adipose_Visceral_Omentum,adipose	gtceqtl,star_ceqtl,gtceqtl,dcceqtl_adipose	IRS1		-0.0469	1.19e-17	0.0055	0.000306	-0.03973	0.011
chr20	6650019	rs6038570†	!A	A	.	LINC01713,BMP2,CASC20,LINC01428,FERMT1,LRRN4	35.28	37.39	LOWEST	3.97e-10	intergenic_variant	.		.	.	.		.	.	.	.	.	.		.	.	.	.	.	.	.	.		.	.	.	.	.	.	.	.	.		0.006	0.183	0.0045	0.904	0.00132	0.00612
chr1	155764023	rs67578967†	!A	A	GON4L	GON4L,MSTO2P,SCARNA26B,DAP3,YY1AP1,SCARNA26A	96.83	97.44	LOW	2.38e-09	downstream_gene_variant	.		.	.	.		.	.	.	.	.	.		.	.	.	.	.	.	.	.		.	.	.	.	.	.	.	.	.		-0.1006	3.21e-10	0.016	0.000707	-0.1043	0.0308
chr13	50015129	rs1195439455†	T	A	TRIM13	DLEU2,TRIM13,KCNRG,MIR3613,MIR16-1,MIR15A	1.97	2.25	LOW	2.38e-09	3_prime_UTR_variant	NM_001007278.3:c.*1965A>T,NM_005798.5:c.*1965A>T,NM_052811.4:c.*1965A>T,NM_213590.3:c.*1965A>T		.	.	.		.	.	.	.	.	.		13	EBPL,EBPL,EBPL,EBPL,EBPL,EBPL,EBPL,EBPL,EBPL,EBPL,EBPL,EBPL,EBPL	rs34505073,rs34505073,rs34505073,rs34505073,rs34505073,rs34505073,rs34505073,rs34505073,rs199780177,rs199780177,rs199780177,rs199780177,rs199780177	0.81255,0.81255,0.81255,0.81255,0.81255,0.81255,0.81255,0.81255,0.812876,0.812876,0.812876,0.812876,0.812876	0.0972358,0.107395,0.0783878,0.0958801,0.0883813,0.0958248,0.12142,0.113693,0.0712969,0.0923064,0.0696677,0.0754826,0.0657124	1.97405e-25,2.76409e-10,2.84879e-12,3.95609e-31,5.67803e-31,5.82177e-21,7.19324e-33,8.69122e-24,1.27497e-10,1.36953e-25,2.83725e-14,5.18444e-14,6.34799e-16	Nerve_Tibial,Stomach,Breast_Mammary_Tissue,Skin_Not_Sun_Exposed_Suprapubic,Skin_Sun_Exposed_Lower_leg,Adipose_Visceral_Omentum,Cells_Cultured_fibroblasts,Esophagus_Mucosa,Esophagus_Muscularis,Thyroid,Adipose_Subcutaneous,Lung,Artery_Tibial	EBPL		.	.	.	.	.	.	.	.	.		0.0593	0.000585	0.0173	0.11	0.06081	0.03809
chr13	26475479	rs61944841	A	G	.	WASF3,CDK8,RNF6,GPR12,LINC00415,SHISA2	41.74	41.85	LOWEST	1.19e-09	intergenic_variant	.		.	.	.			1	OLINK: CRYBB2	OLINK: CRYBB2	OLINK: 0.855041	OLINK: rs7994814		.	.	.	.	.	.	.	.		2	CDK8,CDK8	rs7989124,rs7994814	0.800189,0.855041	-0.315515,-0.367317	5.7111e-15,7.75262540148908e-13	Heart_Atrial_Appendage,adipose	gtceqtl,dcceqtl_adipose	CDK8		0.0069	0.184	0.0052	0.154	0.01525	0.01071
chr22	38203357	rs4821764†	!A	A	MAFF	MAFF,TMEM184B,SNORA92,PLA2G6,CSNK1E,TPTEP2-CSNK1E	40.94	41.87	LOWEST	1.19e-09	intron_variant	NM_001161572.2:c.-32+1119G>A,NM_001161573.1:c.-32+273G>A,NM_001161574.2:c.-52+1145G>A,NM_012323.4:c.-32+1145G>A		.	.	.			10	OLINK: CRLF1,CNTN2,F3,DPP4,ADAM22,MMP3,VIT,CCL11,STC2,KLRB1	OLINK: CRLF1,CNTN2,F3,DPP4,ADAM22,MMP3,VIT,CCL11,STC2,KLRB1	OLINK: 0.855927,0.897999,0.848882,0.907813,0.907813,0.907813,0.998774,0.999467,0.999467,0.830243	OLINK: rs4384,rs11471646,rs539513720,chr22:38184010,rs2267372,rs2267372,rs2267372,rs4820324,rs34364526,rs397933995,rs55951234,rs34364526,rs397933995,rs55951234,chr22:38206516		15	MAFF,MAFF,MAFF,MAFF,MAFF,MAFF,MAFF,MAFF,MAFF,MAFF,MAFF,MAFF,MAFF,MAFF,MAFF	rs13056506,rs2267372,rs2267372,rs2267372,rs2267372,rs2267372,rs2267372,rs2267372,rs2267372,rs2267372,rs2267372,rs2267372,rs2267372,rs2267372,rs4821764	0.89541,0.907813,0.907813,0.907813,0.907813,0.907813,0.907813,0.907813,0.907813,0.907813,0.907813,0.907813,0.907813,0.907813,1	0.0242266,-0.0484905,0.0195876,-0.017242,0.0147846,-0.0382517,-0.0328318,-0.0337874,-0.0665769,-0.0388824,-0.0277167,-0.0345892,0.0277416,-0.0399373,0.0190466	2.65623e-22,1.22878e-11,1.34666e-15,1.37012e-16,1.46546e-11,1.79874e-63,1.8217e-42,1.98858e-19,2.35975e-10,2.573e-23,3.17629e-20,5.35926e-37,5.97565e-12,7.33754e-41,7.18458e-11	Thyroid,Artery_Coronary,Skin_Sun_Exposed_Lower_leg,Muscle_Skeletal,Whole_Blood,Artery_Tibial,Adipose_Subcutaneous,Breast_Mammary_Tissue,Vagina,Artery_Aorta,Esophagus_Mucosa,Lung,Heart_Atrial_Appendage,Adipose_Visceral_Omentum,Skin_Not_Sun_Exposed_Suprapubic	MAFF		8	MAFF,MAFF,MAFF,MAFF,MAFF,MAFF,MAFF,TMEM184B	rs13056506,rs2267372,rs2267372,.,rs4820323,rs2267374,rs2267374,rs11914181	0.89541,0.907813,0.907813,0.999864,0.999864,0.870102,0.870102,0.835185	0.273502058599764,0.361,0.201418,16.5069,16.5069,-0.466906,0.142797,0.283	5.70783842325296e-132,5.186e-10,6.56184e-17,3.2781e-61,3.2781e-61,1.68723835152199e-19,2.73668e-10,6.42e-07	blood,white_blood_cells,Nerve_Tibial,blood,blood,adipose,Adipose_Subcutaneous,lung	dcceqtl_blood,white_blood_cells_ceqtl,gtceqtl,eqtlgen,eqtlgen,dcceqtl_adipose,gtceqtl,lung_ceqtl	MAFF		-0.0352	1.38e-11	0.0052	2.2e-06	-0.05102	0.01078
chr2	624678	rs2903492†	!A	A	.	TMEM18,LOC105373352,LINC01875,LOC100996637,LINC01874,LINC01115	16.51	17.17	LOWEST	1.19e-09	intergenic_variant	.		.	.	.			2	SomaScan: IGHG4,BCAN	SomaScan: IGHG4,BCAN	SomaScan: 0.885486,0.959703	SomaScan: rs2867105,rs6744653		.	.	.	.	.	.	.	.		.	.	.	.	.	.	.	.	.		-0.0241	0.000423	0.0068	0.453	-0.01073	0.01431
[truncated: 80 more columns]

## Sheet: ST2
Supplementary Table 2. Associations between p.Ile225Thr and secondary phenotypes. The table presents the associations between the variant and 84 case-control and quantitative phenotypes linked to myostatin in the literature (references are listed below). Each phenotype is categorized into one of eight categories; Growth and body composition traits, Cardiometabolic diseases and risk traits, Muscul…
The column"Effect" presents standardized beta for CT phenotypes and odds ratio (OR) for CC phenotypes. The column "Total" presents total number of participants for QT phenotypes and number of cases/number of controls in CC phenotypes. References per category are listed below.
Significant p-values after correction for multiple testing (P = 0.05/84 = 6.0 x 10-4 ) are marked in bold.
Only the phenotype Creatinine reached genome-wide significance. P-value thresholds for genome-wide significance: Meta-analysis (P=2.62 x 10-8), deCODE (P=4.80 x 10-8), UKB (P=2.10 x 10-8)
Minor allele frequency (MAF) per cohort: deCODE=0.58%, UKB=0.19%, INTMT=0.27%, CHB/DBDS=0.41%, NashBio=0.17%, FinnGen=1.03%, Estonia=0.47% Husk=0.95%
*UKB=White British/Iris particiants. UKB-Other=Participants that are not categorized as white British/Irish, South Asian or African
Abbreviations: CC, Case-Control phenotype; CHB/DBDS, Copenhagen Hospital Biobank/Danish Blood Donor Study; INTMT, Intermountain; MVP, Million Veteran Program; MRI, Magnetic resonance imaging; UKB, UK Biobank; QT, Quantitative phenotype
Phenotype	Category	References per category (see below)	Phenotype definition	P	Effect	95% CI	Stderr	Type	Total	Cohorts*
Surgical arrest of bleeding from internal nose	Bleeding and hematological complications	1, 2	OPCS 4 code: E05	0.005	2.03	1.24 - 3.33	0.25	CC	2401/426420	UKB
Hemoglobin	Bleeding and hematological complications	1, 2	Hemoglobin levels measured in blood	0.22	0.02	-0.01 - 0.04	0.01	QT	1230030	deCODE, UKB, INTMT, CHB/DBDS, NashBio
Red blood cell count	Bleeding and hematological complications	1. 2	Red blood cell count measured in blood	0.73	-0.005	-0.03 - 0.02	0.01	QT	1123629	deCODE, UKB, INTMT, CHB/DBDS, NashBio
Dilated cardiomyopathy	Cardiometabolic diseases and risk traits	3 - 17	Codes used for definition of the phenotype (all cohorts) is listed in https://code-consensus.netlify.app/	0.02	1.28	1.05 - 1.56	0.1	CC	7388//1771108	deCODE, UKB, INTMT, CHB/DBDS, NashBio, FinnGen, Estonia
Non-ischemic heart failure	Cardiometabolic diseases and risk traits	3 - 17	Codes used for definition of the phenotype (all cohorts) is listed in https://code-consensus.netlify.app/	0.042	1.08	1.00 - 1.16	0.038	CC	80348/1732902	deCODE, UKB, INTMT, CHB/DBDS, NashBio, FinnGen, Estonia
Non-ischemic cardiomyopathy	Cardiometabolic diseases and risk traits	3 - 17	Codes used for definition of the phenotype (all cohorts) is listed in https://code-consensus.netlify.app/	0.32	1.05	0.96 - 1.15	0.046	CC	39464/1785750	deCODE, UKB, INTMT, CHB/DBDS, NashBio, FinnGen, Estonia
Ischemic heart failure	Cardiometabolic diseases and risk traits	3 - 17	Codes used for definition of the phenotype (all cohorts) is listed in https://code-consensus.netlify.app/	0.75	0.98	0.88 - 1.10	0.057	CC	35361/1569420	deCODE, UKB, INTMT, CHB/DBDS, NashBio, FinnGen, Estonia
All heart failure	Cardiometabolic diseases and risk traits	3 - 17	Codes used for definition of the phenotype (all cohorts) is listed in https://code-consensus.netlify.app/	0.9	1	0.94 - 1.05	0.028	CC	153162/1732900	deCODE, UKB, INTMT, CHB/DBDS, NashBio, FinnGen, Estonia
Type 2 diabetes (T2D)	Cardiometabolic diseases and risk traits	3 - 17	deCODE: ICD-10 code E11 and corresponding ICD-9 codes; Self-report; Use of oral diabetes medication; HbA1c > 6.5% on two occasions. UKB: ICD-10 code E11 and corresponding ICD-9 codes; Self-report. CHB/DBDS and INTMT: ICD-10 code E11 and corresponding ICD-8/9 codes.FinnGen: ICD-10 code E11 and corresponding ICD-9 codes; ATC-code A10B	0.006	0.94	0.89 - 0.98	0.02	CC	201513/1495670	deCODE, UKB, INTMT, CHB/DBDS, FinnGen
Diabetic polyneuropathy	Cardiometabolic diseases and risk traits	3 - 17	ICD-10 code: G63.2 and corresponding ICD-8/9 codes	0.07	1.51	0.96 - 2.38	0.23	CC	2715/1050990	deCODE, UKB, HUSK, CHB/DBDS, UKB-Other
Ischemic stroke	Cardiometabolic diseases and risk traits	3 - 17	ICD-10: I63 and corresponding ICD-8/9 codes	0.07	0.93	0.85 - 1.01	0.04	CC	76077/1699299	deCODE, UKB, HUSK, INTMT, CHB/DBDS, NashBio, FinnGen, MVP
Coronary artery disease (CAD)	Cardiometabolic diseases and risk traits	3 - 17	deCODE and CHB/DBDS: ICD-10 codes I20.0, I21-I25, Z95.1, Z95.5 and corresponding ICD-8/9 codes; NOMESCO procedure codes FNA, FNB, FNC, FND, FNE, FNF, FNG. UKB: ICD-10 codes I20.0, I21-I25, Z95.1, Z95.5 and corresponding ICD-9 codes; OPCS procedure codes K40, K45. INTMT and NashBio: ICD-10 codes I20.0, I21-I25, Z95.1, Z95.5 and corresponding ICD-9 codes. MVP: Phecode 411.4. FinnGen: ICD-10 codes I…	0.28	0.98	0.93 - 1.02	0.02	CC	380112/1856175	deCODE, UKB, INTMT, CHB/DBDS, NashBio, FinnGen, MVP
Sick sinus syndrome	Cardiometabolic diseases and risk traits	3 - 17	ICD-10 code: I49.5, ICD-9 code: 427.81	0.39	1.08	0.90 - 1.30	0.09	CC	21251/1707170	deCODE, UKB, INTMT, CHB/DBDS, NashBio, MVP
Right bundle branch block	Cardiometabolic diseases and risk traits	3 - 17	ICD-10 code: I45.0/I45.1, ICD-9 code: 426.4, Philips-ECG: RBBB, GE-ECG: 440	0.44	0.95	0.83 - 1.09	0.07	CC	34423/2066072	deCODE, UKB, INTMT, CHB/DBDS, NashBio, FinnGen, MVP
Diabetic retinopathy	Cardiometabolic diseases and risk traits	3 - 17	ICD-10 code: H36.0 and corresponding ICD-8/9 codes	0.50	1.08	0.86 - 1.36	0.12	CC	37712/1059752	deCODE, UKB, UKB-Other, MVP
Ventricular tachycardia	Cardiometabolic diseases and risk traits	3 - 17	ICD-10: I47.2	0.51	0.93	0.75 - 1.15	0.11	CC	20556/1723686	deCODE, UKB, INTMT, CHB/DBDS, NashBio, MVP
Hypertrophic obstructive cardiomyopathy	Cardiometabolic diseases and risk traits	3 - 17	ICD-10 code: I42.1 and corresponding ICD-8/9 codes	0.57	0.88	0.58 - 1.35	0.22	CC	2992/2116589	deCODE, UKB, INTMT, CHB/DBDS, NashBio, FinnGen, MVP
Myocarditis	Cardiometabolic diseases and risk traits	3 - 17	ICD-10 codes: I40, I41, I51.4 and corresponding ICD-8/9 codes	0.74	0.95	0.72 - 1.26	0.14	CC	3845/1512598	deCODE, UKB, INTMT, CHB/DBDS, FinnGen
Cardiac arrest with ventricular fibrillation	Cardiometabolic diseases and risk traits	3 - 17	ICD-10 code: I46/I49.0, ICD-9 code: 427.4/427.5	0.75	1.02	0.89 - 1.18	0.07	CC	23412/2001484	deCODE, UKB, INTMT, CHB/DBDS, NashBio, FinnGen, MVP
Left bundle branch block	Cardiometabolic diseases and risk traits	3 - 17	ICD-10 code: I44.4/I44.5/I44.6/I44.7, ICD-9 code: 426.3, Philips-ECG: LBBB, GE-ECG: 460/470/471	0.76	1.02	0.90 - 1.15	0.06	CC	42493/2022154	deCODE, UKB, INTMT, CHB/DBDS, NashBio, FinnGen, MVP
Atrial fibrillation and flutter	Cardiometabolic diseases and risk traits	3 - 17	ICD-10 code: I48, ICD-9 code: 427.3	0.89	1.00	0.95 - 1.06	0.03	CC	268697/1819327	deCODE, UKB, INTMT, CHB/DBDS, NashBio, FinnGen, MVP
Supraventricular tachycardia	Cardiometabolic diseases and risk traits	3 - 17	ICD-10 code: I47.1 and corresponding ICD-8/9 codes	0.89	0.99	0.84 - 1.16	0.08	CC	32517/1739950	deCODE, UKB, INTMT, CHB/DBDS, NashBio, MVP
Atrioventricular block	Cardiometabolic diseases and risk traits	3 - 17	ICD-10 code: I44.0/I44.1/I44.2/I44.3, ICD-9 code: 426.0/426.11,426.12,426.13, Philips-ECG: 1AVB/2AVB/2AVB2/2AVB3/2AVB4/2AVBV/WENCK/3AVB, GE-ECG: 101/103/104/105/106	0.94	1.00	0.91 - 1.09	0.04	CC	80910/2062886	deCODE, UKB, INTMT, CHB/DBDS, NashBio, FinnGen, MVP
Essential primary hypertension	Cardiometabolic diseases and risk traits	3 - 17	ICD-10 code: I10 and corresponding ICD-8/9 codes	5.1e-05	0.92	0.89 - 0.96	0.02	CC	882927/1409034	deCODE, UKB, HUSK, INTMT, CHB/DBDS, NashBio, UKB-Other, FinnGen, MVP
Myocardial infarction (MI)	Cardiometabolic diseases and risk traits	3 - 17	deCODE, UKB, CHB/DBDS and INTMT: ICD10 code I21- I23, I25.2 and corresponding ICD-8/9 codes. ICD-10 I21, I22. Excluding: ICD-10 I21.90, I21.97, I22.90, I22.97	0.13	0.95	0.90 - 1.01	0.03	CC	124636/1550733	deCODE, UKB, INTMT, CHB/DBDS, FinnGen
Apolipoprotein A (ApoA)	Cardiometabolic diseases and risk traits	3 - 17	Apolipoprotein A levels measured in blood	0.17	0.03	-0.01 - 0.08	0.02	QT	410275	deCODE, UKB
Triglycerides	Cardiometabolic diseases and risk traits	3 - 17	Triglycerides levels measured in blood	0.22	-0.02	-0.05 - 0.01	0.01	QT	883948	deCODE, UKB, CHB/DBDS
HDL cholesterol	Cardiometabolic diseases and risk traits	3 - 17	High-density lipoprotein cholesterol concentration measured in blood	0.24	0.01	-0.01 - 0.04	0.01	QT	882400	deCODE, UKB, CHB/DBDS, NashBio
Fasting glucose	Cardiometabolic diseases and risk traits	3 - 17	Fasting glucose concentration measured in blood	0.79	0.007	-0.05 - 0.06	0.03	QT	190978	deCODE, INTMT
Non-HDL cholesterol	Cardiometabolic diseases and risk traits	3 - 17	Non-HDL cholesterol calculated as total cholesterol minus HDL cholesterol.	0.79	-0.004	-0.03 - 0.02	0.01	QT	901411	deCODE, UKB, INTMT, CHB/DBDS, NashBio
Glycated hemoglobin (HbA1c)	Cardiometabolic diseases and risk traits	3 - 17	Glycated hemoglobin levels in blood	0.81	0.004	-0.03 - 0.04	0.02	QT	735257	deCODE, UKB, INTMT, CHB/DBDS
Total cholesterol	Cardiometabolic diseases and risk traits	3 - 17	Total cholesterol levels in blood	0.84	-0.003	-0.03 - 0.02	0.01	QT	1017003	deCODE, UKB, INTMT, CHB/DBDS, NashBio
Diastolic blood pressure	Cardiometabolic diseases and risk traits	3 - 17	Diastolic blood pressure measurements	0.93	-0.002	-0.04 - 0.04	0.02	QT	627323	deCODE, UKB, NashBio
LDL cholesterol	Cardiometabolic diseases and risk traits	3 - 17	Low-density lipoprotein cholesterol concentration measured in blood	0.93	-0.001	-0.03 - 0.03	0.01	QT	971395	deCODE, UKB, INTMT, CHB/DBDS, NashBio
Systolic blood pressure (SBP)	Cardiometabolic diseases and risk traits	3 - 17	Systolic blood pressure measurements	0.96	0.001	-0.04 - 0.04	0.02	QT	642945	deCODE, UKB, NashBio
Apolipoprotein B (ApoB)	Cardiometabolic diseases and risk traits	3 - 17	Apolipoprotein B levels measured in blood	1.00	0.0e+00	-0.05 - 0.05	0.02	QT	433022	deCODE, UKB
Left ventricular mass (LVM)	Cardiometabolic diseases and risk traits	3 - 17	Left ventricular mass derived from cardiac MRI, adj. for BMI and MRI scanner	0.42	0.05	-0.07 - 0.17	0.06	QT	60052	UKB
Left ventricular ejection fraction (LVEF)	Cardiometabolic diseases and risk traits	3 - 17	Left ventricular ejection fraction derived from cardiac MRI, adj. for BMI and MRI scanner	0.36	-0.06	-0.18 - 0.07	0.06	QT	60052	UKB
Left atrial volume (LAV max, ml)	Cardiometabolic diseases and risk traits	3 - 17	Maximum left atrial volume derived from cardiac MRI, adj. for BMI and MRI scanner	0.44	0.05	-0.17 - 0.08	0.06	QT	59382	UKB
Left ventricular stroke volume (LVSV, ml)	Cardiometabolic diseases and risk traits	3 - 17	Left ventricular stroke volume derived from cardiac MRI, adj. for BMI and MRI scanner	0.29	0.07	-0.06 - 0.19	0.06	QT	60052	UKB
Chronic kidney disease	Chronic respiratory and renal diseases	18 - 20	ICD-10 code: N18 and corresponding ICD-8/9 codes	0.02	1.09	1.01 - 1.18	0.04	CC	147509/2168239	deCODE, UKB, HUSK, INTMT, CHB/DBDS, NashBio, UKB-Other, FinnGen, MVP
Chronic obstructive pulmonary disease (COPD)	Chronic respiratory and renal diseases	18 - 20	More details on the way.	0.06	0.91	0.82 - 1.01	0.05	CC	70499/1147062	deCODE, UKB, INTMT, CHB/DBDS, NashBio
Chronic kidney disease - stage 5	Chronic respiratory and renal diseases	18 - 20	ICD-10 code: N18.5 and corresponding ICD-8/9 codes	0.38	0.88	0.66 - 1.17	0.15	CC	11937/1783603	deCODE, UKB, HUSK, INTMT, CHB/DBDS, NashBio, UKB-Other, MVP
Asthma	Chronic respiratory and renal diseases	18 - 20	ICD-10 code: J45 and corresponding ICD-8/9 codes	0.86	0.99	0.93 - 1.06	0.04	CC	219622/1612516	deCODE, UKB, HUSK, INTMT, CHB/DBDS, NashBio, UKB-Other, MVP
DXA arm fat mass	Growth and body composition traits	21 - 25	Arm fat mass derived from DXA, adj. for BMI and height	0.001	-0.15	-0.24 - -0.06	0.05	QT	78926	deCODE, UKB
DXA total fat mass	Growth and body composition traits	21 - 25	Whole body fat mass derived from DXA, adj. for BMI and height	0.002	-0.14	-0.23 - -0.05	0.05	QT	78932	deCODE, UKB
DXA leg fat mass	Growth and body composition traits	21 - 25	Leg fat mass derived from DXA, adj. for BMI and height	0.003	-0.14	-0.23 - -0.04	0.05	QT	78931	deCODE, UKB
DXA trunk fat mass	Growth and body composition traits	21 - 25	Trunk fat mass derived from DXA, adj. for BMI and height	0.04	-0.10	-0.19 - -0.01	0.05	QT	78932	deCODE, UKB
Waist circumference (WC)	Growth and body composition traits	21 - 25	Circumference around waist	0.04	-0.05	-0.10 - -0.00	0.02	QT	439765	deCODE, UKB
Waist-to-hip ratio (WHR)	Growth and body composition traits	21 - 25	Ratio between waist and hip circumference	0.04	-0.05	-0.09 - -0.00	0.02	QT	448032	deCODE, UKB
Body mass index (BMI)	Growth and body composition traits	21 - 25	Weight (kg) divided by height (m2)	0.41	-0.01	-0.04 - 0.02	0.01	QT	554749	deCODE, UKB
Weight	Growth and body composition traits	21 - 25	Weight measurement	0.46	0.01	-0.02 - 0.05	0.02	QT	643923	deCODE, UKB, NashBio
Femoral neck bone mineral density	Growth and body composition traits	21 - 25	DXA-derived bone mineral density measured at the femoral neck	0.64	0.21	0.13 - 0.30	0.04	QT	81026	deCODE, UKB
Lumbar spine bone mineral density	Growth and body composition traits	21 - 25	DXA-derived bone mineral density measured at the lumbar spine	0.75	0.10	0.02 - 0.19	0.04	QT	79837	deCODE, UKB
Hip circumference (HC)	Growth and body composition traits	21 - 25	Circumference around hips	0.86	-0.004	-0.05 - 0.04	0.02	QT	448076	deCODE, UKB
Whole body bone mineral density	Growth and body composition traits	21 - 25	DXA-derived bone mineral density measured across the entire body	0.94	0.005	-0.12 - 0.13	0.06	QT	107477	UKB, GEFOS
Birthweight	Growth and body composition traits	21 - 25	Body weight at birth	5.7e-07	0.13	0.08 - 0.17	0.03	QT	374725	deCODE, UKB
Mean grip strength	Muscle biology and function	26 - 32	Mean grip strength measured using a handgrip dynamometer	0.002	0.08	0.03 - 0.12	0.02	QT	424576	UKB
Follistatin related protein 3 (FSTL3)	Muscle biology and function	26 - 32	Follistatin related protein 3 levels measured in blood	0.08	-0.13	-0.27 - 0.01	0.07	QT	46446	UKB
Follistatin (FST)	Muscle biology and function	26 - 32	Follistatin concentration measured in blood	0.26	-0.08	-0.22 - 0.06	0.07	QT	46446	UKB
Cystatin C	Muscle biology and function	26 - 32	Cystatin C levels measured in blood	0.29	0.02	-0.02 - 0.07	0.02	QT	456678	deCODE, UKB
Insulin-Like Growth Factor 1 (IGF-1)	Muscle biology and function	26 - 32	Insulin-like growth factor 1 concentration measured in blood	0.38	-0.02	-0.07 - 0.03	0.03	QT	407390	UKB
Duration of walks	Muscle biology and function	26 - 32	Self-reported number of minutes usually spent walking in one day	0.51	0.02	-0.03 - 0.07	0.03	QT	351878	UKB
Myoglobin	Muscle biology and function	26 - 32	Myoglobin concentration measured in blood	0.72	-0.03	-0.16 - 0.11	0.07	QT	46446	UKB
Max grip strength	Muscle biology and function	26 - 32	Max grip strength measured using a handgrip dynamometer	3.8e-04	0.09	0.04 - 0.13	0.02	QT	424576	UKB
Frequency of stair climbing in last 4 weeks	Muscle biology and function	26 - 32	Self-reported average number of times per day a flight of stairs was climbed at home over the previous four weeks	4.1e-04	0.09	0.04 - 0.14	0.03	QT	401276	UKB
Creatinine	Muscle biology and function	26 - 32	Creatinine levels measured in blood	9.9e-21	0.12	0.10 - 0.15	0.01	QT	1183832	deCODE, UKB, INTMT, CHB/DBDS, NashBio
Injury of muscle and tendon at wrist and hand level	Musculoskeletal disorders and injuries	33 - 39	ICD-10 code: S66 and corresponding ICD-8/9 codes	0.02	1.39	1.06 - 1.82	0.14	CC	8695/970491	deCODE, UKB, INTMT, NashBio, UKB-Other
Dislocation sprain and strain of joints and ligaments of lumbar spine and pelvis	Musculoskeletal disorders and injuries	33 - 39	ICD-10 code:S33 and corresponding ICD-8/9 codes	0.30	0.90	0.74 - 1.10	0.10	CC	29380/1369499	deCODE, UKB, INTMT, NashBio, UKB-Other, MVP
Kyphosis and lordosis	Musculoskeletal disorders and injuries	33 - 39	ICD-10 code:M40 and corresponding ICD-8/9 codes	0.60	1.10	0.77 - 1.57	0.18	CC	5268/1314178	deCODE, UKB, INTMT, CHB/DBDS, NashBio, UKB-Other
Osteoporosis	Musculoskeletal disorders and injuries	33 - 39	deCODE and UKB: ICD10 M80, M81, ICD9 7330, or LS-BMD-Tscore ≤ 2.5SD, or FN-BMD-Tscore ≤ -2.5SD, or ATC:M05B drugs (excluding cancer cases from drug users). CHB/DBDS and INTMT: ICD10 M80, M81. FinnGen: ICD10 M80, M81, M82, ICD9 7330, ICD8 7230	0.60	1.02	0.94 - 1.11	0.04	CC	77797/1575736	deCODE, UKB, INTMT, CHB/DBDS, FinnGen
Postmenopausal osteoporotic fractures - over 50 years of age	Musculoskeletal disorders and injuries	33 - 39	ICD 10 codes S220, S32, S422, S424, S720, S721, S722, S823, S825, and S826, and corresponding fractures from questionnaires, occuring after the age of 50 years. All fractures (ICD-10 codes S02, S12, S22, S32, S42, S52, S62, S72, S82, and S92 excluded from controls	0.73	1.02	0.90 - 1.16	0.06	CC	52276/348722	deCODE, UKB, INTMT, CHB/DBDS
Injury of muscle and tendon at ankle and foot level	Musculoskeletal disorders and injuries	33 - 39	ICD-10 code: S96 and corresponding ICD-8/9 codes	0.99	1.00	0.84 - 1.19	0.09	CC	10185/947601	deCODE, UKB, INTMT, NashBio, UKB-Other
Muscular dystrophy	Other	40 - 42	ICD-10 code: G71.0 and corresponding ICD-8/9 codes	0.64	0.90	0.59 - 1.39	0.22	CC	1023/1876598	deCODE, UKB, HUSK, INTMT, CHB/DBDS, NashBio, UKB-Other, FinnGen
Long labour	Other	40 - 42	ICD-10 code: O63 and corresponding ICD-8/9 codes	0.72	0.98	0.87 - 1.10	0.06	CC	20511/1032943	deCODE, UKB, INTMT, NashBio, UKB-Other, FinnGen
Lifespan - 50 years	Other	40 - 42	Time to death among those who lived to be at least 50 years of age	0.70	0.007	-0.03 - 0.04	0.02	QT	651448	deCODE, UKB, HUSK, CHB/DBDS
Female infertility	Reproductive endocrinology and infertility	43 - 46	ICD-10 code: N97 and corresponding ICD-8/9 codes	0.10	1.08	0.99 - 1.18	0.05	CC	38917/1357952	deCODE, UKB, INTMT, CHB/DBDS, NashBio, UKB-Other, FinnGen, MVP
Male infertility	Reproductive endocrinology and infertility	43 - 46	ICD-10 code: N46 and corresponding ICD-8/9 codes	0.37	1.11	0.89 - 1.38	0.11	CC	8564/1657599	deCODE, UKB, INTMT, CHB/DBDS, NashBio, UKB-Other, FinnGen, MVP
Sex hormone binding globulin (SHBG)	Reproductive endocrinology and infertility	43 - 46	Sex hormone–binding globulin concentration measured in blood	0.006	0.06	0.02 - 0.10	0.02	QT	427850	deCODE, UKB
Testosterone	Reproductive endocrinology and infertility	43 - 46	Testosterone levels measured in blood	0.09	-0.04	-0.08 - 0.01	0.02	QT	458176	deCODE, UKB, CHB/DBDS, NashBio
Follicle stimulating hormone (FSH)	Reproductive endocrinology and infertility	43 - 46	Follicle-stimulating hormone concentration measured in blood	0.11	0.09	-0.02 - 0.19	0.05	QT	49672	deCODE, UKB
Estradiol	Reproductive endocrinology and infertility	43 - 46	Estradiol concentration measured in blood	0.65	0.02	-0.06 - 0.09	0.04	QT	63890	deCODE
17 Hydroxyprogesterone	Reproductive endocrinology and infertility	43 - 46	17-Hydroxyprogesterone concentration measured in blood	0.82	-0.04	-0.36 - 0.29	0.17	QT	4795	deCODE
Luteinising hormone (LH)	Reproductive endocrinology and infertility	43 - 46	Luteinising hormone levels measured in blood	0.84	0.01	-0.10 - 0.12	0.06	QT	42240	deCODE, UKB
References
1. Fenaux, P. et al. Luspatercept in Patients with Lower-Risk Myelodysplastic Syndromes. N Engl J Med 382, 140-151 (2020).
2. Campbell, C. et al. Myostatin inhibitor ACE-031 treatment of ambulatory boys with Duchenne muscular dystrophy: Results of a randomized, placebo-controlled clinical trial. Muscle Nerve 55, 458-464 (2017).
3. Artaza, J.N. et al. Alterations in myostatin expression are associated with changes in cardiac left ventricular mass but not ejection fraction in the mouse. J Endocrinol 194, 63-76 (2007).
4. Hildebrandt, L. et al. Myostatin/AKT/FOXO Signaling Is Altered in Human Non-Ischemic Dilated Cardiomyopathy. Life (Basel) 12(2022).
5. Baán, J.A. et al. Myostatin and IGF-I signaling in end-stage human heart failure: a qRT-PCR study. J Transl Med 13, 1 (2015).
6. Bączek, J. et al. Evaluation of Serum Myostatin Concentration in Chronic Heart Failure with Preserved and Impaired Left Ventricular Ejection Fraction. J Clin Med 13(2024).
7. Biesemann, N. et al. Myostatin regulates energy homeostasis in the heart and prevents heart failure. Circ Res 115, 296-310 (2014).
8. Shyu, K.G., Lu, M.J., Wang, B.W., Sun, H.Y. & Chang, H. Myostatin expression in ventricular myocardium in a rat model of volume-overload heart failure. Eur J Clin Invest 36, 713-9 (2006).
9. Brandt, C. et al. Plasma and muscle myostatin in relation to type 2 diabetes. PLoS One 7, e37236 (2012).
10. Liu, X.H., Bauman, W.A. & Cardozo, C.P. Myostatin inhibits glucose uptake via suppression of insulin-dependent and -independent signaling pathways in myoblasts. Physiol Rep 6, e13837 (2018).
11. Guo, T. et al. Myostatin inhibition in muscle, but not adipose tissue, decreases fat mass and improves insulin sensitivity. PLoS One 4, e4937 (2009).
12. Heymsfield, S.B. et al. Effect of Bimagrumab vs Placebo on Body Fat Mass Among Adults With Type 2 Diabetes and Obesity: A Phase 2 Randomized Clinical Trial. JAMA Netw Open 4, e2033457 (2021).
13. Han, D.S. et al. Serum myostatin is reduced in individuals with metabolic syndrome. PLoS One 9, e108230 (2014).
14. Tu, P. et al. Genetic disruption of myostatin reduces the development of proatherogenic dyslipidemia and atherogenic lesions in Ldlr null mice. Diabetes 58, 1739-48 (2009).
15. Fernández-Solà, J., Borrisser-Pairó, F., Antúnez, E. & Tobías, E. Myostatin and insulin-like growth factor-1 in hypertensive heart disease: a prospective study in human heart donors. J Hypertens 33, 851-8; discussion 859 (2015).
16. Meloux, A. et al. Growth Differentiation Factor-8 (GDF8)/Myostatin is a Predictor of Troponin I Peak and a Marker of Clinical Severity after Acute Myocardial Infarction. J Clin Med 9(2019).
17. Barallobre-Barreiro, J. et al. Glycoproteomics Reveals Decorin Peptides With Anti-Myostatin Activity in Human Atrial Fibrillation. Circulation 134, 817-32 (2016).
18. Bataille, S. et al. Mechanisms of myostatin and activin A accumulation in chronic kidney disease. Nephrol Dial Transplant 37, 1249-1260 (2022).
19. Tan, Z. et al. Myostatin is involved in skeletal muscle dysfunction in chronic obstructive pulmonary disease via Drp-1 mediated abnormal mitochondrial division. Ann Transl Med 10, 162 (2022).
20. Akenroye, A., Nopsopon, T., Cho, L., Moll, M. & Weiss, S.T. Lower myostatin and higher MUC1 levels are associated with better response to mepolizumab and omalizumab in asthma: a protein-protein interaction analyses. Respir Res 24, 305 (2023).
21. McPherron, A.C. & Lee, S.J. Suppression of body fat accumulation in myostatin-deficient mice. J Clin Invest 109, 595-601 (2002).
22. Perry, C.A., Van Guilder, G.P. & Butterick, T.A. Decreased myostatin in response to a controlled DASH diet is associated with improved body composition and cardiometabolic biomarkers in older adults: results from a controlled-feeding diet intervention study. BMC Nutr 8, 24 (2022).
23. Osman, N.M., Shafey, H.I., Abdelhafez, M.A., Sallam, A.M. & Mahrous, K.F. Genetic variations in the Myostatin gene affecting growth traits in sheep. Vet World 14, 475-482 (2021).
24. Arounleut, P. et al. A myostatin inhibitor (propeptide-Fc) increases muscle mass and muscle fiber size in aged mice but does not increase bone density or bone strength. Exp Gerontol 48, 898-904 (2013).
25. Hamrick, M.W. Increased bone mineral density in the femora of GDF8 knockout mice. Anat Rec A Discov Mol Cell Evol Biol 272, 388-91 (2003).
26. Camporez, J.P. et al. Anti-myostatin antibody increases muscle mass and strength and improves insulin sensitivity in old mice. Proc Natl Acad Sci U S A 113, 2212-7 (2016).
27. Becker, C. et al. Myostatin antibody (LY2495655) in older weak fallers: a proof-of-concept, randomised, phase 2 trial. Lancet Diabetes Endocrinol 3, 948-57 (2015).
28. Rodino-Klapac, L.R. et al. Inhibition of myostatin with emphasis on follistatin as a therapy for muscle disease. Muscle Nerve 39, 283-96 (2009).
29. Mukherjee, A. et al. FSTL3 deletion reveals roles for TGF-beta family ligands in glucose and fat homeostasis in adults. Proc Natl Acad Sci U S A 104, 1348-53 (2007).
30. Brancaccio, P., Lippi, G. & Maffulli, N. Biochemical markers of muscular damage. Clin Chem Lab Med 48, 757-67 (2010).
31. Hennebry, A. et al. IGF1 stimulates greater muscle hypertrophy in the absence of myostatin in male mice. J Endocrinol 234, 187-200 (2017).
32. Liu, C., Levey, A.S. & Ballew, S.H. Serum creatinine and serum cystatin C as an index of muscle mass in adults. Curr Opin Nephrol Hypertens 33, 557-565 (2024).
33. Mendias, C.L., Bakhurin, K.I. & Faulkner, J.A. Tendons of myostatin-deficient mice are small, brittle, and hypocellular. Proc Natl Acad Sci U S A 105, 388-93 (2008).
34. Guo, W. et al. Joint dysfunction and functional decline in middle age myostatin null mice. Bone 83, 141-148 (2016).
35. Hamrick, M.W., Pennington, C. & Byron, C.D. Bone architecture and disc degeneration in the lumbar spine of mice lacking GDF-8 (myostatin). J Orthop Res 21, 1025-32 (2003).
36. Kishimoto, K. et al. Production of a breed of red sea bream Pagrus major with an increase of skeletal muscle mass and reduced body length by genome editing with CRISPR/Cas9. Aquaculture 495, 415-427 (2018).
37. Suh, J. et al. GDF11 promotes osteogenesis as opposed to MSTN, and follistatin, a MSTN/GDF11 inhibitor, increases muscle mass but weakens bone. Proc Natl Acad Sci U S A 117, 4910-4920 (2020).
38. Kellum, E. et al. Myostatin (GDF-8) deficiency increases fracture callus size, Sox-5 expression, and callus bone volume. Bone 44, 17-23 (2009).
39. Oestreich, A.K. et al. Myostatin deficiency partially rescues the bone phenotype of osteogenesis imperfecta model mice. Osteoporos Int 27, 161-70 (2016).
40. Muntoni, F. et al. The Clinical Development of Taldefgrobep Alfa: An Anti-Myostatin Adnectin for the Treatment of Duchenne Muscular Dystrophy. Neurol Ther 13, 183-219 (2024).
41. Purfield, D.C., Evans, R.D. & Berry, D.P. Breed- and trait-specific associations define the genetic architecture of calving performance traits in cattle. J Anim Sci 98(2020).
42. Oliveira, P.G.S. et al. Association Between Serum Myostatin Levels, Hospital Mortality, and Muscle Mass and Strength Following ST-Elevation Myocardial Infarction. Heart Lung Circ 31, 365-371 (2022).
43. Ongaro, L. et al. Muscle-derived myostatin is a major endocrine driver of follicle-stimulating hormone synthesis. Science 387, 329-336 (2025).
44. Carrarelli, P. et al. Myostatin, follistatin and activin type II receptors are highly expressed in adenomyosis. Fertil Steril 104, 744-52.e1 (2015).
45. Han, S.Z. et al. Semen quality and fertilization ability of myostatin-knockout boars. Theriogenology 135, 109-114 (2019).
46. Ciarmela, P., Wiater, E., Smith, S.M. & Vale, W. Presence, actions, and regulation of myostatin in rat uterus and myometrial cells. Endocrinology 150, 906-14 (2009).

## Sheet: ST3
Supplementary Table 3. Rare predicted loss-of-function variants included in the MSTN burden analysis. In MSTN, 34 carriers of 28 predicted loss-of-function (pLOF) variants were identified (carrier counts per phenotype are shown in Supplementary Table 8). pLOF variants were selected using the Ensembl Variant Effect Predictor (VEP). The burden model included rare variants with minor allele frequenc…
Chrom	Pos	cRef	cAlt	Freq	Info	Source
chr2	190057258	T	C	2.22554e-06	0.919924	UKB 500K
chr2	190057303	A	T	1.16465e-06	0.876645	UKB 500K
chr2	190057317	C	A	1.30908e-06	0.778865	UKB 500K
chr2	190057370	CA	C	3.13081e-06	0.975031	UKB 500K
chr2	190057474	A	C	1.20228e-06	0.846629	UKB 500K
chr2	190057548	G	A	6.17551e-06	1	NashBio
chr2	190057548	G	A	1.08836e-06	0.934729	UKB 500K
chr2	190057568	TCA	T	1.07107e-06	0.949838	UKB 500K
chr2	190057640	T	A	6.18176e-06	0.999002	NashBio
chr2	190060154	GT	G	1.09751e-06	0.927208	UKB 500K
chr2	190060172	G	A	1.11277e-06	0.914552	UKB 500K
chr2	190060178	CT	C	1.11582e-06	0.912721	UKB 500K
chr2	190060199	GC	G	1.30196e-06	0.783583	UKB 500K
chr2	190060200	C	T	6.17551e-06	1	NashBio
chr2	190060241	G	A	6.17551e-06	1	NashBio
chr2	190060241	G	A	1.21143e-06	0.840466	UKB 500K
chr2	190060277	TGATGA	T	1.10667e-06	0.919281	UKB 500K
chr2	190060298	CA	C	1.1677e-06	0.871637	UKB 500K
chr2	190060304	CTG	C	1.15244e-06	0.883794	UKB 500K
chr2	190060329	C	CAA	1.1382e-06	0.894035	UKB 500K
chr2	190060403	TG	T	1.06395e-06	0.956205	UKB 500K
chr2	190060437	T	C	6.17551e-06	1	NashBio
chr2	190062223	C	T	6.17551e-06	1	NashBio
chr2	190062359	G	GTTGTCTTA	6.17551e-06	1	NashBio
chr2	190062359	G	GTTGTCTTA	4.28834e-06	0.949146	UKB 500K
chr2	190062442	CT	C	1.20635e-06	0.84529	UKB 500K
chr2	190062552	CA	C	1.02428e-06	0.993062	UKB 500K
chr2	190062561	CA	C	1.02936e-06	0.98816	UKB 500K

## Sheet: ST4
Supplementary Table 4. Carrier count for p.Ile225Thr and rare MSTN Loss of function variants in UK Biobank dataset and NASHBio. Information on homozygous was not available in Genetic Factors for Osteoporosis Consortium (GEFOS), number of carriers was estimated based on allele frequency and number of participants (1 - 0.9934 * 66,628).
	Meta analysis				UK Biobank				Iceland			HerediGene, Intermountain			Denmark			GEFOS*		NASHBio
Phenotype	p.Ile225Thr heterozygous	p.Ile225Thr homozygous	MSTN LoF carriers		p.Ile225Thr heterozygous	p.Ile225Thr homozygous	MSTN LoF carriers		p.Ile225Thr heterozygous	p.Ile225Thr homozygous		p.Ile225Thr heterozygous	p.Ile225Thr homozygous		p.Ile225Thr heterozygous	p.Ile225Thr homozygous		p.Ile225Thr heterozygous		p.Ile225Thr heterozygous	p.Ile225Thr homozygous	MSTN LoF carriers
Arm fat mass DXA	493	1	5		237	0	5		256	1		-	-		-	-		-		-	-	-
Arm lean mass DXA	493	1	5		237	0	5		256	1		-	-		-	-		-		-	-	-
Birthweight	1404	3	14		991	1	14		413	2		-	-		-	-		-		-	-	-
Body Mass Index	2872	4	24		1717	2	24		1155	2		-	-		-	-		-		-	-	-
Creatinine	6847	15	29		1646	2	23		1848	4		486	1		2628	7		-		239	1	6
Cystatin C	2143	4	23		1650	2	23		493	2		-	-		-	-		-		-	-	-
Femoral neck BMD	611	1	4		156	0	4		455	1		-	-		-	-		-		-	-	-
Height	3264	4	30		1721	2	24		1244	2		-	-		-	-		-		299	0	6
Hip Circumference	2051	2	24		1717	2	24		334	0		-	-		-	-		-		-	-	-
Leg fat mass DXA	493	1	5		237	0	5		256	1		-	-		-	-		-		-	-	-
Leg lean mass DXA	493	1	5		237	0	5		256	1		-	-		-	-		-		-	-	-
Lumbar spine BMD	605	1	4		156	0	4		449	1		-	-		-	-		-		-	-	-
Max grip strength BMIadj	1710	2	24		1710	2	24		-	-		-	-		-	-		-		-	-	-
Mean grip strength BMIadj	1710	2	24		1710	2	24		-	-		-	-		-	-		-		-	-	-
Total fat mass DXA	493	1	5		237	0	5		256	1		-	-		-	-		-		-	-	-
Total lean mass DXA	493	1	5		237	0	5		256	1		-	-		-	-		-		-	-	-
Trunk fat mass DXA	493	1	5		237	0	5		256	1		-	-		-	-		-		-	-	-
Trunk lean mass DXA	493	1	5		237	0	5		256	1		-	-		-	-		-		-	-	-
Waist circumference	1866	2	24		1716	2	24		150	0		-	-		-	-		-		-	-	-
Waist Hip Ratio	1971	2	24		1716	2	24		255	0		-	-		-	-		-		-	-	-
Weight	3257	6	31		1717	2	24		1222	3		-	-		-	-		-		318	1	7
Whole body BMD	603	0	4		163	0	4		-	-		-	-		-	-		440		-	-	-

## Sheet: ST5
Supplementary Table 5. Detailed information on gene expression datasets. The datasets, except for DeCODE RNAseq, include publicly available cis-eQTL information. Abbreviations are used in the "cis-eQTL source" column in Supplementary Table 2.
Abbreviation	Source	Title	Abstract	Tissues	Number of Individuals	Number of genes	Link
dcceqtla	DeCODE RNAseq			Whole blood	13175	14248
dcceqtlb	DeCODE RNAseq			Adipose	700	9396
gtceqtl	GTEx v9			49 tissues	650	16729
eqtlgen	Vosa et al.	Unraveling the polygenic architecture of complex traits using blood eQTL meta-analysis	We performed cis- and trans-expression quantitative trait locus (eQTL) analysis in blood from 31,684 individuals through the eQTLGen Consortium. We observed that cis-eQTLs can be detected for 88% of the studied genes.	blood	31000	13195	Vosa et al.External Information
liver_ceqtl	Strunz et al.(2018)	A mega-analysis of expression quantitative trait loci (eQTL) provides insight into the regulatory architecture of gene expression variation in liver	We extracted publicly available data and computed the largest eQTL data set for liver tissue to date. Genotypes and expression data from all studies underwent rigorous quality control. Subsequently, Matrix eQTL was used to identify significant local eQTL. In total, liver samples from 588 individuals revealed 202,489 significant eQTL variants affecting 1,959 genes (Q-Value < 0.001). In addition, a…	Liver	588	1299	Strunz et al.(2018)External Information
eyeceqtl	Ratnapriya et al. (2019)	Retinal transcriptome and eQTL analyses identify genes associated with age-related macular degeneration	We generated transcriptional profiles of postmortem retinas from 453 controls and cases at distinct stages of AMD and integrated retinal transcriptomes, covering 13,662 protein-coding and 1,462 noncoding genes, with genotypes at more than 9 million common SNPs for expression quantitative trait loci (eQTL) analysis of a tissue not included in Genotype-Tissue Expression (GTEx) and other large datas…	eye	453	5160	Ratnapriya et al. (2019)External Information
brainserve_eqtl	Ng et al. (2017)	An xQTL map integrates the genetic architecture of the human brain's transcriptome and epigenome	Genotype data were generated from 2,093 individuals of European-descent. Of these individuals, gene expression (RNA-seq)(n=494), DNA methylation17 (450K Illumina array)(n=468), and histone modification data (H3K9Ac ChIP-seq)(n=433) were derived from post-mortem frozen samples of a single cortical region, the dorsolateral prefrontal cortex (DLPFC). 411 individuals have all four data types. Genotyp…	brain	494	3041	Ng et al. (2017)External Information
star_ceqtl	Hauberg et al. (2017)	Large-Scale Identification of Common Trait and Disease Variants Affecting Gene Expression	We integrated associations of common genetic variants in 57 GWASs with 24 studies of expression quantitative trait loci (eQTLs) from a broad range of tissues by using a Mendelian randomization approach. We discovered a total of 3,484 instances of gene-trait-associated changes in expression at a false-discovery rate < 0.05. To facilitate interpretation, we provide this lexicon of how common trait-…	CMC Brain, DLPFC (467) commonmind.org and STARNET Artery, aortic root (AS) (539) Artery, ITA (no AS) (552) Blood (481) Fat, subcutaneous (573) Fat, visceral (531) Liver (576) Muscle, skeletal (534)	550	1078	Hauberg et al. (2017)External Information
exsnp_mo_ceqtl	Zeller et al. (2010)	Genetics and beyond-The transcriptome of human monocytes and disease susceptibility	To get better insight into the overall variability of gene expression, we assessed the transcriptome of circulating monocytes, a key cell involved in immunity-related diseases and atherosclerosis, in 1,490 unrelated individuals and investigated its association with >675,000 SNPs and 10 common cardiovascular risk factors. Out of 12,808 expressed genes, 2,745 expression quantitative trait loci were…	Monocytes	1490	2745	Zeller et al. (2010)External Information
lung_ceqtl	Hao et al. (2012)	Lung eQTLs to Help Reveal the Molecular Underpinnings of Asthma	By studying lung specimens from 1,111 individuals of European ancestry, we found a large number of genetic variants affecting gene expression in the lung, or lung expression quantitative trait loci (eQTL).	Lung	1111	4932	Hao et al. (2012)External Information
neptune_kidneyT_ceqtl	Gillies et al. (2018)	An eQTL Landscape of Kidney Tissue in Human Nephrotic Syndrome	Here, we used whole-genome sequencing (WGS) and microdissected glomerular (GLOM) and tubulointerstitial (TI) transcriptomes from 187 individuals with nephrotic syndrome (NS) to describe the eQTL landscape in these functionally distinct kidney structures. Using MatrixEQTL, we performed cis-eQTL analysis on GLOM (n = 136) and TI (n = 166). We discovered 894 GLOM eQTLs and 1,767 TI eQTLs at FDR < 0.…	Kidney (glomerulus)	187	557	Gillies et al. (2018)External Information
neptune_kidneyG_ceqtl	Gillies et al. (2018)	An eQTL Landscape of Kidney Tissue in Human Nephrotic Syndrome	Here, we used whole-genome sequencing (WGS) and microdissected glomerular (GLOM) and tubulointerstitial (TI) transcriptomes from 187 individuals with nephrotic syndrome (NS) to describe the eQTL landscape in these functionally distinct kidney structures. Using MatrixEQTL, we performed cis-eQTL analysis on GLOM (n = 136) and TI (n = 166). We discovered 894 GLOM eQTLs and 1,767 TI eQTLs at FDR < 0.…	Kidney (tubulointerstitial)	187	557	Gillies et al. (2018)External Information
white_blood_cells_ceqtl	Pala et al. (2017)	Population- and individual-specific regulatory variation in Sardinia	We combined whole-genome and transcriptome data for 624 individuals from Sardinia to identify common and rare variants that influence gene expression and splicing. We identified 21,183 expression quantitative trait loci (eQTLs) and 6,768 splicing quantitative trait loci (sQTLs), including 619 new QTLs.	White blood cells	624	7679	Pala et al. (2017)External Information
blood_vasc_metab_ceqtl	Franzen et al. (2016)	Cardiometabolic Risk Loci Share Downstream Cis- and Trans-Gene Regulation Across Tissues and Diseases	In the Stockholm-Tartu Atherosclerosis Reverse Networks Engineering Task study (STARNET), we recruited 600 well-characterized CAD patients, genotyped DNA (6,245,505 DNA variant calls with minor allele frequency >5%), and sequenced RNA isolated from blood, atherosclerotic-lesion-free internal mammary artery (MAM), atherosclerotic aortic root (AOR), subcutaneous fat (SF), visceral abdominal fat (VA…	blood and six vascular and metabolic tissues	600	1823	Franzen et al. (2016)External Information
dendritic_ceqtl	Lee at al. (2014)	Common genetic variants modulate pathogen-sensing responses in human dendritic cells	We derived dendritic cells (DCs) from peripheral blood monocytes of healthy individuals (295 Caucasians, 122 African Americans, 117 East Asians) and stimulated them with Escherichia coli lipopolysaccharide (LPS), influenza virus, or the cytokine interferon-? (IFN-?) to generate 1598 transcriptional profiles. We genotyped each of these individuals at sites of common genetic variation and identifie…	dendritic cells (resting and stimulated)	534	171	Lee at al. (2014)External Information
grundb_adi_lcl_skin_ceqtl	Grundberg et al. (2016)	Mapping cis- and trans-regulatory effects across multiple tissues in twins	We designed the MuTHER project (Multiple Tissue Human Expression Resource) to develop a major resource of detailed genomic and transcriptome data from three disease-relevant tissues (adipose, lymphoblastoid cell lines (LCLs) and skin) originating from a cohort of 856 deeply phenotyped twins. In total, 856 female twins (154 monozygotic twin pairs, 232 dizygotic twin pairs and 84 singletons) aged 3…	Adipose, lymphocyte cell lines, skin	777	3215	Grundberg et al. (2016)External Information

## Sheet: ST6
Supplementary Table 6. Number of participants in the UK Biobank with image-derived phenotypes (IDPs) from DXA or MRI scans. Missing IDPs were imputed using supervised deep learning regression models trained directly on raw imaging data. The table provides information on the number of imputed participants for each phenotype.
Type	Modality	Phenotype	IDPs	Imputed	Total	% imputed
DXA	GE-Lunar iDXA	Arms fat	32250	34621	66871	0.517728
DXA	GE-Lunar iDXA	Legs fat	32250	34621	66871	0.517728
DXA	GE-Lunar iDXA	Total fat	40293	26578	66871	0.397452
DXA	GE-Lunar iDXA	Trunk fat	32250	34621	66871	0.517728
DXA	GE-Lunar iDXA	Arms lean	32250	34621	66871	0.517728
DXA	GE-Lunar iDXA	Legs lean	32250	34621	66871	0.517728
DXA	GE-Lunar iDXA	Total lean	32250	34621	66871	0.517728
DXA	GE-Lunar iDXA	Trunk lean	32250	34621	66871	0.517728
MRI	Siemens 1.5T MAGNETOM Aera	Abdominal subcutaneous adipose tissue volume (ASAT)	40167	10942	51109	0.214091
MRI	Siemens 1.5T MAGNETOM Aera	Anterior thigh fat-free muscle volume (left)	39654	11455	51109	0.224129	Combined in one phenotype
MRI	Siemens 1.5T MAGNETOM Aera	Anterior thigh fat-free muscle volume (right)	39860	11249	51109	0.220098	Combined in one phenotype
MRI	Siemens 1.5T MAGNETOM Aera	Muscle fat infiltration	39368	11741	51109	0.229725
MRI	Siemens 1.5T MAGNETOM Aera	Posterior thigh fat-free muscle volume (left)	39687	11422	51109	0.223483	Combined in one phenotype
MRI	Siemens 1.5T MAGNETOM Aera	Posterior thigh fat-free muscle volume (right)	39874	11235	51109	0.219824	Combined in one phenotype
MRI	Siemens 1.5T MAGNETOM Aera	Total adipose tissue volume	8522	42587	51109	0.833258
MRI	Siemens 1.5T MAGNETOM Aera	Total lean tissue volume	8522	42587	51109	0.833258
MRI	Siemens 1.5T MAGNETOM Aera	Total thigh fat-free muscle volume	39437	11672	51109	0.228375
MRI	Siemens 1.5T MAGNETOM Aera	Total trunk fat volume	40085	11024	51109	0.215696
MRI	Siemens 1.5T MAGNETOM Aera	Visceral adipose tissue volume (VAT)	40178	10931	51109	0.213876

## Sheet: ST7
Supplementary Table 7. LD score regression heritability of the DXA lean mass GWA meta-analysis. Heritability was estimated using LD score regression (Bulik-Sullivan BK, Loh PR, Finucane HK, et al. LD Score regression distinguishes confounding from polygenicity in genome-wide association studies. Nat Genet. 2015;47(3):291-295. doi:10.1038/ng.3211).
Phenotype	Combined		Females		Males
Total lean mass adjusted for BMI	0.21	0.01	0.23	0.02	0.22	0.02
Trunk lean mass adjusted for BMI	0.2	0.01	0.21	0.02	0.22	0.02
Arm lean mass adjusted for BMI	0.18	0.01	0.19	0.02	0.18	0.02
Leg lean mass adjusted for BMI	0.21	0.01	0.24	0.02	0.22	0.02

## Sheet: ST8
Supplementary Table 8. Assessment of appendicular lean mass variants from 'The genetic architecture of appendicular lean mass characterized by association analysis in the UK Biobank study' (Pei YF et al., PubMed ID: 33097823). The published variants were looked up in the Icelandic and UK Biobank datasets, and effect alleles of 970 variants were matched across datasets. The variants were tested ag…
Pheno_publ	INITIAL_SAMPLE_SIZE	REGION	CHR_ID	CHR_POS	REPORTED_GENES	MAPPED_GENE	UPSTREAM_GENE_ID	DOWNSTREAM_GENE_ID	SNP_GENE_IDS	UPSTREAM_GENE_DISTANCE	DOWNSTREAM_GENE_DISTANCE	rsName	EA_publ	SNP_ID_CURRENT	CONTEXT	INTERGENIC	RISK_ALLELE_FREQUENCY	P_publ	PVALUE_MLOG	P_VALUE_TEXT	OR_or_BETA	X95perc_CI_TEXT	Pos	Ref	Alt	Freq	Info	Column1	App_lean_Effect_Allele	App_lean_Other_Allele	App_lean_comb_Pval	App_lean_comb_Effect	App_lean_UKB_Pval	App_lean_UKB_Effect	App_lean_ICE_Pval	App_lean_ICE_Effect	Repl_App	P_repl_App
Appendicular lean mass	450,243 European ancestry individuals	1p36.22	1	10200534	intergenic	UBE4B - KIF1B	ENSG00000130939	ENSG00000054523		19295	10036	rs3903151	A	3903151	intergenic_variant	1	0.5794	1e-16	16	NA	0.0157	[0.012-0.019] unit decrease	10200534	A	G	0.420092	0.99944511		G	A	0.0574	0.0098	0.0375	0.01232	0.854	0.00192	NA	NA
Appendicular lean mass	450,243 European ancestry individuals	1p36.22	1	10765520	CASZ1	CASZ1			ENSG00000130940	NA	NA	rs11121615	T	11121615	intron_variant	0	0.6894	2e-22	21.699	NA	0.02	[0.016-0.024] unit decrease	10765520	C	T	0.691667	0.99348262		!T	T	0.0261	0.0124	0.0313	0.0137	0.48	0.00807	1	1
Appendicular lean mass	450,243 European ancestry individuals	1p13.3	1	109274968	CELSR2	CELSR2			ENSG00000143126	NA	NA	rs12740374	T	12740374	3_prime_UTR_variant	0	0.2214	2e-10	9.69897	NA	0.015	[0.01-0.02] unit increase	109274968	G	T	0.221999	0.99979651		T	G	0.0229	0.0141	0.0287	0.01546	0.462	0.00961	1	1
Appendicular lean mass	450,243 European ancestry individuals	1p13.3	1	109392703	SORT1	SORT1			ENSG00000134243	NA	NA	rs3768495	T	3768495	5_prime_UTR_variant	0	0.7173	1e-17	17	NA	0.0178	[0.014-0.022] unit decrease	109392703	C	T	0.715494	0.99963243		!T	T	0.000202	0.021	0.000881	0.0215	0.0961	0.01941	1	1
Appendicular lean mass	450,243 European ancestry individuals	1p13.2	1	112713746	PPM1J	PPM1J			ENSG00000155367	NA	NA	rs12724682	C	12724682	intron_variant	0	0.1289	4e-13	12.3979	NA	0.0203	[0.015-0.026] unit increase	112713746	G	C	0.128701	0.99973484		C	G	0.000134	0.0291	0.00228	0.02665	0.0179	0.0369	1	1
Appendicular lean mass	450,243 European ancestry individuals	1p12	1	118327750	intergenic	RNA5SP56 - PSMC1P12	ENSG00000222209	ENSG00000226126		63261	286583	rs60804050	A	60804050	intergenic_variant	1	0.2559	5e-24	23.301	NA	0.0217	[0.018-0.026] unit decrease	118327750	G	A	0.255666	0.999633		A	G	0.171	0.0081	0.641	0.00314	0.0491	0.02364	NA	NA
Appendicular lean mass	450,243 European ancestry individuals	1p12	1	118866969	intergenic	PSMC1P12 - TBX15	ENSG00000226126	ENSG00000092607		251323	16077	rs57445715	T	57445715	intergenic_variant	1	0.7328	3e-12	11.5229	NA	0.0148	[0.011-0.019] unit increase	118866969	T	C	0.269098	0.99786062		C	T	0.238	-0.0068	0.461	-0.0049	0.28	-0.0123	NA	NA
Appendicular lean mass	450,243 European ancestry individuals	1p11.2	1	120453741	NBPF9	NBPF8			ENSG00000270231	NA	NA	rs320826	C	320826	intron_variant	0	0.4954	6e-12	11.2218	NA	0.0154	[0.011-0.02] unit increase	120453741	C	G	5.437e-06	0.43765515		NA	NA	NA	NA	NA	NA	NA	NA	NA	NA
Appendicular lean mass	450,243 European ancestry individuals	1q21.2	1	150554878	ADAMTSL4	ADAMTSL4, ADAMTSL4-AS2			ENSG00000143382, ENSG00000237781	NA	NA	rs9659073	A	9659073	intron_variant	0	0.4754	5e-26	25.301	NA	0.0198	[0.016-0.024] unit decrease	150554878	G	A	0.476711	0.99826286		A	G	9.1e-05	-0.0202	0.000116	-0.02275	0.265	-0.01191	1	1
Appendicular lean mass	450,243 European ancestry individuals	1q21.3	1	151090823	GABPB2	GABPB2			ENSG00000143458	NA	NA	rs115161931	T	115161931	intron_variant	0	0.0402	5e-15	14.301	NA	0.0393	[0.029-0.049] unit decrease	151090823	C	T	0.0418021	0.99084668		T	C	0.143	-0.0188	0.0465	-0.02917	0.55	0.01614	NA	NA
Appendicular lean mass	450,243 European ancestry individuals	1q21.3	1	155018913	DCST2	DCST2			ENSG00000163354	NA	NA	rs905938	T	905938	intron_variant	0	0.7351	8e-77	76.0969	NA	0.0394	[0.035-0.044] unit decrease	155018913	T	C	0.266465	0.99736301		C	T	0.0566	0.0088	0.00584	0.01835	0.978	0.00038	NA	NA
Appendicular lean mass	450,243 European ancestry individuals	1q22	1	155637684	AL353807.3	MSTO1 - YY1AP1	ENSG00000125459	ENSG00000163374		22733	21759	rs61812150	A	61812150	intron_variant	1	0.0278	9e-18	17.0458	NA	0.0513	[0.04-0.063] unit increase	155637684	G	A	0.0310338	0.99412684		A	G	0.579	-0.0078	0.524	-0.01081	0.904	-0.00404	NA	NA
Appendicular lean mass	450,243 European ancestry individuals	1q22	1	156142631	LMNA	LMNA - SEMA4A	ENSG00000160789	ENSG00000196189		2550	4735	rs11264447	T	11264447	intergenic_variant	1	0.6552	1e-12	12	NA	0.0141	[0.01-0.018] unit decrease	156142631	G	T	0.654978	0.99449922		!T	T	0.147	0.0079	0.222	0.00754	0.428	0.00903	NA	NA
Appendicular lean mass	450,243 European ancestry individuals	1q23.1	1	156932467	LRRC71	LRRC71			ENSG00000160838	NA	NA	rs822430	A	822430	synonymous_variant	0	0.5221	4e-12	11.3979	NA	0.013	[0.0093-0.0167] unit decrease	156932467	G	A	0.520896	0.99954185		!A	A	0.951	-2e-04	0.912	0.00063	0.687	-0.00423	NA	NA
Appendicular lean mass	450,243 European ancestry individuals	1p36.13	1	16177886	intergenic	EPHA2-AS1 - ARHGEF19-AS1	ENSG00000227959	ENSG00000234166		19738	19968	rs7538833	T	7538833	intergenic_variant	1	0.3761	5e-10	9.30103	NA	0.012	[0.0083-0.0157] unit increase	16177886	T	A	0	nan		NA	NA	NA	NA	NA	NA	NA	NA	NA	NA
Appendicular lean mass	450,243 European ancestry individuals	1p36.13	1	16177886	intergenic	EPHA2-AS1 - ARHGEF19-AS1	ENSG00000227959	ENSG00000234166		19738	19968	rs7538833	T	7538833	intergenic_variant	1	0.3761	5e-10	9.30103	NA	0.012	[0.0083-0.0157] unit increase	16177886	T	C	0.624303	0.99946452		!C	C	0.0824	0.0091	0.0319	0.01295	0.788	-0.00288	NA	NA
Appendicular lean mass	450,243 European ancestry individuals	1p36.13	1	16980101	MFAP2	MFAP2			ENSG00000117122	NA	NA	rs2284747	T	2284747	intron_variant	0	0.5213	2e-16	15.699	NA	0.0154	[0.012-0.019] unit increase	16980101	C	T	0.523987	0.99952163		!T	T	0.183	0.0069	0.688	0.00239	0.0453	0.02114	NA	NA
Appendicular lean mass	450,243 European ancestry individuals	1q24.2	1	170204121	LINC01681	LINC01681			ENSG00000233985	NA	NA	rs6687139	A	6687139	intron_variant	0	0.9001	2e-13	12.699	NA	0.0222	[0.016-0.028] unit decrease	170204121	A	G	0.100573	0.99882128		G	A	0.576	0.0036	0.388	0.00842	0.961	-0.00077	NA	NA
Appendicular lean mass	450,243 European ancestry individuals	1q24.3	1	172394348	DNM3	DNM3, PIGC			ENSG00000197959, ENSG00000135845	NA	NA	rs1052256	A	1052256	non_coding_transcript_exon_variant	0	0.8118	3e-20	19.5229	NA	0.0219	[0.017-0.027] unit decrease	172394348	A	G	0.190756	0.99912218		G	A	0.407	0.0054	0.764	0.00226	0.261	0.01441	NA	NA
Appendicular lean mass	450,243 European ancestry individuals	1p36.33	1	1732422	SLC35E2A	CDK11A - SLC35E2A	ENSG00000008128	ENSG00000215790		8065	2268	rs2294487	A	2294487	non_coding_transcript_exon_variant	1	0.4105	6e-14	13.2218	NA	0.015	[0.011-0.019] unit increase	1732422	G	A	0.416891	0.97250599		A	G	4.26e-05	0.0213	0.000989	0.01974	0.013	0.02594	1	1
Appendicular lean mass	450,243 European ancestry individuals	1q25.1	1	176058064	COP1	COP1			ENSG00000143207	NA	NA	rs78275727	A	78275727	intron_variant	0	0.7716	3e-13	12.5229	NA	0.0163	[0.012-0.021] unit increase	176058064	G	A	0.768602	0.99980895		!A	A	0.0397	-0.0124	0.0483	-0.0137	0.493	-0.00846	1	1
Appendicular lean mass	450,243 European ancestry individuals	1q25.2	1	176530924	PAPPA2	PAPPA2			ENSG00000116183	NA	NA	rs4233168	A	4233168	intron_variant	0	0.0812	1e-11	11	NA	0.023	[0.016-0.03] unit increase	176530924	A	T	0.91871	0.99305305		!T	T	0.884	0.0014	0.426	0.00855	0.214	-0.02633	NA	NA
Appendicular lean mass	450,243 European ancestry individuals	1q25.2	1	176552213	PAPPA2	PAPPA2			ENSG00000116183	NA	NA	rs11583447	T	11583447	intron_variant	0	0.5729	4e-26	25.3979	NA	0.0201	[0.016-0.024] unit decrease	176552213	T	A	1.31326e-07	0.086946789		NA	NA	NA	NA	NA	NA	NA	NA	NA	NA
Appendicular lean mass	450,243 European ancestry individuals	1q25.2	1	176552213	PAPPA2	PAPPA2			ENSG00000116183	NA	NA	rs11583447	T	11583447	intron_variant	0	0.5729	4e-26	25.3979	NA	0.0201	[0.016-0.024] unit decrease	176552213	T	G	0.43067	0.98415908		G	T	0.0138	0.0129	0.0176	0.01408	0.432	0.00865	1	1
Appendicular lean mass	450,243 European ancestry individuals	1q25.2	1	176552519	PAPPA2	PAPPA2			ENSG00000116183	NA	NA	rs10913200	A	10913200	intron_variant	0	0.0285	2e-18	17.699	NA	0.0488	[0.038-0.06] unit decrease	176552519	G	A	0.0288246	0.9832539		A	G	0.258	-0.0182	0.325	-0.01735	0.569	-0.02287	NA	NA
Appendicular lean mass	450,243 European ancestry individuals	1q25.2	1	177904248	intergenic	LINC01741 - SEC16B	ENSG00000236720	ENSG00000120341		191973	19708	rs576101	A	576101	intron_variant	1	0.3249	1e-16	16	NA	0.0166	[0.013-0.021] unit increase	177904248	T	A	0.327293	0.99971228		A	T	0.000654	0.0187	0.0014	0.01999	0.206	0.01441	1	1
Appendicular lean mass	450,243 European ancestry individuals	1q25.3	1	180936558	KIAA1614	KIAA1614			ENSG00000135835	NA	NA	rs3795503	T	3795503	missense_variant	0	0.3145	2e-18	17.699	NA	0.0176	[0.014-0.022] unit increase	180936558	C	T	0.315611	0.99853488		T	C	0.433	-0.0031	0.203	-0.00805	0.901	0.00135	NA	NA
Appendicular lean mass	450,243 European ancestry individuals	1q25.3	1	183132309	LAMC1	LAMC1			ENSG00000135862	NA	NA	rs12071514	A	12071514	intron_variant	0	0.4106	1e-24	24	NA	0.0198	[0.016-0.024] unit increase	183132309	A	C	0.571296	0.9997833		C	A	0.288	-0.0055	0.257	-0.00666	0.884	-0.00154	NA	NA
Appendicular lean mass	450,243 European ancestry individuals	1q25.3	1	183132309	LAMC1	LAMC1			ENSG00000135862	NA	NA	rs12071514	A	12071514	intron_variant	0	0.4106	1e-24	24	NA	0.0198	[0.016-0.024] unit increase	183132309	A	G	0	nan		NA	NA	NA	NA	NA	NA	NA	NA	NA	NA
Appendicular lean mass	450,243 European ancestry individuals	1q25.3	1	184898697	FAM129A	NIBAN1			ENSG00000135842	NA	NA	rs234640	T	234640	intron_variant	0	0.5142	4e-12	11.3979	NA	0.0131	[0.0094-0.0168] unit decrease	184898697	C	T	0.515543	0.99579606		!T	T	0.0562	0.0098	0.204	0.00742	0.0985	0.01749	NA	NA
Appendicular lean mass	450,243 European ancestry individuals	1p36.13	1	19428536	CAPZB	CAPZB			ENSG00000077549	NA	NA	rs1472565	T	1472565	intron_variant	0	0.5333	9e-13	12.0458	NA	0.0134	[0.0097-0.0171] unit increase	19428536	T	C	0.464932	0.99962292		C	T	0.0474	-0.0101	0.0784	-0.01031	0.361	-0.00961	1	1
Appendicular lean mass	450,243 European ancestry individuals	1q32.1	1	201047168	CACNA1S	CACNA1S			ENSG00000081248	NA	NA	rs3850625	A	3850625	missense_variant	0	0.1182	3e-18	17.5229	NA	0.0252	[0.02-0.031] unit decrease	201047168	G	A	0.118448	0.99606118		A	G	2.95e-13	-0.0593	6.6e-12	-0.0621	0.0102	-0.04747	1	1
Appendicular lean mass	205,513 European ancestry men	1q32.1	1	201047168	CACNA1S	CACNA1S			ENSG00000081248	NA	NA	rs3850625	A	3850625	missense_variant	0	0.118	9e-06	5.04576	NA	0.02	[0.012-0.028] unit decrease	201047168	G	A	0.118448	0.99606118		A	G	2.95e-13	-0.0593	6.6e-12	-0.0621	0.0102	-0.04747	1	1
Appendicular lean mass	244,730 European ancestry women	1q32.1	1	201047168	CACNA1S	CACNA1S			ENSG00000081248	NA	NA	rs3850625	A	3850625	missense_variant	0	0.118	9e-14	13.0458	NA	0.03	[0.022-0.038] unit decrease	201047168	G	A	0.118448	0.99606118		A	G	2.95e-13	-0.0593	6.6e-12	-0.0621	0.0102	-0.04747	1	1
Appendicular lean mass	450,243 European ancestry individuals	1q32.1	1	201926536	LMOD1	LMOD1			ENSG00000163431	NA	NA	rs72744832	T	72744832	intron_variant	0	0.9165	2e-18	17.699	NA	0.0296	[0.023-0.036] unit increase	201926536	T	C	0.0831617	0.9976238		C	T	0.000325	-0.0337	0.000525	-0.03683	0.257	-0.02268	1	1
Appendicular lean mass	450,243 European ancestry individuals	1q32.1	1	203739906	ATP2B4	ATP2B4			ENSG00000058668	NA	NA	rs955865	A	955865	3_prime_UTR_variant	0	0.4202	4e-15	14.3979	NA	0.0149	[0.011-0.019] unit increase	203739906	A	G	0.578989	0.99114922		!G	G	0.0374	0.0108	0.0125	0.01496	0.881	-0.00154	NA	1
Appendicular lean mass	450,243 European ancestry individuals	1q32.1	1	205749730	NUCKS1	NUCKS1			ENSG00000069275	NA	NA	rs7536483	A	7536483	intron_variant	0	0.5726	7e-33	32.1549	NA	0.0226	[0.019-0.026] unit increase	205749730	A	T	0.428265	0.99978615		T	A	0.544	-0.0031	0.44	-0.00453	0.896	0.00135	NA	NA
Appendicular lean mass	450,243 European ancestry individuals	1q32.2	1	207853394	MIR29B2CHG	MIR29B2CHG			ENSG00000203709	NA	NA	rs7532674	T	7532674	intron_variant	0	0.261	3e-12	11.5229	NA	0.015	[0.011-0.019] unit increase	207853394	G	T	0.262637	0.99641498		T	G	0.176	0.0078	0.0364	0.01395	0.349	-0.01095	NA	NA
Appendicular lean mass	450,243 European ancestry individuals	1q32.3	1	211579542	SLC30A1	SLC30A1 - NTRAS	ENSG00000170385	ENSG00000227764		381	59898	rs3041304	CTTCCGCG	3041304	regulatory_region_variant	1	0.2246	6e-18	17.2218	NA	0.0192	[0.015-0.024] unit increase	211579541	C	CTTCCGCG	0.224429	0.99876809		CTTCCGCG	C	0.436	0.0047	0.254	0.00792	0.656	-0.00557	NA	NA
Appendicular lean mass	450,243 European ancestry individuals	1q32.3	1	212027834	INTS7	INTS7			ENSG00000143493	NA	NA	rs66579625	CT	66579625	intron_variant	0	0.5837	9e-21	20.0458	NA	0.0178	[0.014-0.022] unit increase	212027833	C	CT	0.585696	0.99960943		!CT	CT	0.0187	-0.0122	0.189	-0.00779	0.0131	-0.02652	1	1
Appendicular lean mass	450,243 European ancestry individuals	1q32.3	1	212027834	INTS7	INTS7			ENSG00000143493	NA	NA	rs66579625	CT	66579625	intron_variant	0	0.5837	9e-21	20.0458	NA	0.0178	[0.014-0.022] unit increase	212027833	C	CTT	0.000302523	0.93549988		CTT	C	0.324	-0.1845	0.324	-0.18455	NA	NA	NA	NA
Appendicular lean mass	205,513 European ancestry men	1q32.3	1	212101071	DTL	DTL			ENSG00000143476	NA	NA	rs6540718	A	6540718	missense_variant	0	0.014	1e-09	9	NA	0.07	[0.046-0.094] unit increase	212101071	A	C	0.985785	0.99945056		!C	C	0.494	0.0127	0.947	0.00163	0.0941	0.08187	NA	NA
Appendicular lean mass	450,243 European ancestry individuals	1q32.3	1	212101071	DTL	DTL			ENSG00000143476	NA	NA	rs6540718	A	6540718	missense_variant	0	0.0142	1e-12	12	NA	0.0543	[0.039-0.069] unit increase	212101071	A	C	0.985785	0.99945056		!C	C	0.494	0.0127	0.947	0.00163	0.0941	0.08187	NA	NA
Appendicular lean mass	450,243 European ancestry individuals	1p36.12	1	21258448	ECE1	ECE1			ENSG00000117298	NA	NA	rs212526	T	212526	intron_variant	0	0.3993	4e-29	28.3979	NA	0.0214	[0.018-0.025] unit decrease	21258448	T	C	0.601098	0.99718417		!C	C	0.0149	-0.0127	0.0107	-0.01534	0.665	-0.00461	NA	1
Appendicular lean mass	450,243 European ancestry individuals		NA	NA	PTPN14					NA	NA	chr1:214629251	A	NA		1	0.3961	2e-38	37.699	NA	0.0248	[0.021-0.029] unit decrease	214629251	AGTT	A	8.19657e-06	0.99256438		NA	NA	NA	NA	NA	NA	NA	NA	NA	NA
Appendicular lean mass	450,243 European ancestry individuals		NA	NA	PTPN14					NA	NA	chr1:214629251	A	NA		1	0.3961	2e-38	37.699	NA	0.0248	[0.021-0.029] unit decrease	214629251	AGTT	A	8.19657e-06	0.99256438		NA	NA	NA	NA	NA	NA	NA	NA	NA	NA
Appendicular lean mass	450,243 European ancestry individuals	1q41	1	214857808	intergenic	CENPF - GAPDHP24	ENSG00000117724	ENSG00000185221		193234	12926	rs1415181	T	1415181	regulatory_region_variant	1	0.5926	7e-14	13.1549	NA	0.0141	[0.01-0.018] unit increase	214857808	T	C	0.405933	0.99411613		C	T	0.535	0.0033	0.724	0.00214	0.519	0.00711	NA	NA
Appendicular lean mass	450,243 European ancestry individuals	1q41	1	217846741	SPATA17	SPATA17			ENSG00000162814	NA	NA	rs11811226	A	11811226	intron_variant	0	0.5559	2e-16	15.699	NA	0.0156	[0.012-0.019] unit decrease	217846741	A	T	0.444974	0.99589506		T	A	0.509	0.0034	0.238	0.00691	0.425	-0.00865	NA	NA
Appendicular lean mass	450,243 European ancestry individuals	1q41	1	218318779	RRP15	RRP15			ENSG00000067533	NA	NA	rs3121580	T	3121580	intron_variant	0	0.1728	3e-11	10.5229	NA	0.0158	[0.011-0.021] unit decrease	218318779	T	A	5.53567e-05	0.74111434		A	T	0.256	-0.5255	0.256	-0.52548	NA	NA	NA	NA
Appendicular lean mass	450,243 European ancestry individuals	1q41	1	218318779	RRP15	RRP15			ENSG00000067533	NA	NA	rs3121580	T	3121580	intron_variant	0	0.1728	3e-11	10.5229	NA	0.0158	[0.011-0.021] unit decrease	218318779	T	C	0.829616	0.99759044		!C	C	0.542	-0.0034	0.989	0.00013	0.12	-0.02191	NA	NA
Appendicular lean mass	450,243 European ancestry individuals	1q41	1	218347653	TGFB2	TGFB2			ENSG00000092969	NA	NA	rs6658835	A	6658835	intron_variant	0	0.7308	9e-20	19.0458	NA	0.018	[0.014-0.022] unit decrease	218347653	A	G	0.268249	0.99822442		G	A	0.0175	-0.0137	0.0772	-0.01169	0.0871	-0.02037	NA	1
Appendicular lean mass	450,243 European ancestry individuals	1q41	1	218458110	intergenic	TGFB2 - LINC02869	ENSG00000092969	ENSG00000228208		13491	1155	rs6604614	C	6604614	intergenic_variant	1	0.7154	5e-29	28.301	NA	0.0232	[0.019-0.027] unit decrease	218458110	C	G	0.28319	0.99955144		G	C	0.405	0.0048	0.0682	0.01182	0.0979	-0.02018	NA	NA
Appendicular lean mass	450,243 European ancestry individuals	1q41	1	218458110	intergenic	TGFB2 - LINC02869	ENSG00000092969	ENSG00000228208		13491	1155	rs6604614	C	6604614	intergenic_variant	1	0.7154	5e-29	28.301	NA	0.0232	[0.019-0.027] unit decrease	218458110	C	T	6.92059e-06	0.85087493		T	C	0.622	-0.4905	0.622	-0.49053	NA	NA	NA	NA
Appendicular lean mass	450,243 European ancestry individuals	1q41	1	218861482	intergenic	U3 - NXNP1	ENSG00000281710	ENSG00000226693		319583	20118	rs78763889	T	78763889	intergenic_variant	1	0.0417	1e-12	12	NA	0.0332	[0.024-0.042] unit increase	218861482	G	T	0.0422094	0.99938541		T	G	0.37	-0.0118	0.261	-0.01634	0.762	0.00961	NA	NA
Appendicular lean mass	450,243 European ancestry individuals	1q41	1	219447227	LYPLAL1-AS1	LYPLAL1-AS1			ENSG00000228536	NA	NA	rs12724708	A	12724708	intron_variant	0	0.6426	2e-35	34.699	NA	0.0243	[0.02-0.028] unit decrease	219447227	A	T	0.357763	0.9969233		T	A	0.00543	0.0148	0.0746	0.01081	0.0111	0.02825	1	1
Appendicular lean mass	450,243 European ancestry individuals	1p36.12	1	22145958	WNT4	WNT4 - MIR4418	ENSG00000162552	ENSG00000266564		1989	120281	rs7543136	T	7543136	intron_variant	1	0.7209	1e-23	23	NA	0.021	[0.017-0.025] unit decrease	22145958	C	T	0.72187	0.99683125		!T	T	0.84	-0.0011	0.74	-0.00214	0.872	0.00173	NA	NA
Appendicular lean mass	450,243 European ancestry individuals	1p36.12	1	22259939	intergenic	WNT4 - MIR4418	ENSG00000162552	ENSG00000266564		115970	6300	rs6682646	A	6682646	regulatory_region_variant	1	0.1721	4e-12	11.3979	NA	0.0156	[0.011-0.02] unit decrease	22259939	A	G	0.829834	0.99833119		!G	G	0.367	-0.0063	0.511	-0.00515	0.485	-0.01076	NA	NA
Appendicular lean mass	450,243 European ancestry individuals	1q41	1	222767413	intergenic	FAM177B - DISP1	ENSG00000197520	ENSG00000154309		16409	47609	rs61826465	T	61826465	intron_variant	1	0.7472	6e-11	10.2218	NA	0.0141	[0.0098-0.0184] unit increase	222767413	C	T	0.7459	0.99947365		!T	T	0.708	0.0022	0.842	0.00138	0.688	0.0048	NA	NA
Appendicular lean mass	450,243 European ancestry individuals	1p36.33	1	2233260	SKI	SKI			ENSG00000157933	NA	NA	rs377599	T	377599	intron_variant	0	0.383	3e-29	28.5229	NA	0.0217	[0.018-0.025] unit increase	2233260	C	T	0.382491	0.99898767		T	C	0.0778	0.0093	0.155	0.00855	0.284	0.01172	NA	NA
Appendicular lean mass	450,243 European ancestry individuals	1q42.13	1	227915460	WNT9A	PRSS38 - WNT9A	ENSG00000185888	ENSG00000143816		68990	3196	rs34780873	T	34780873	regulatory_region_variant	1	0.7971	3e-14	13.5229	NA	0.0183	[0.014-0.023] unit increase	227915460	T	G	0.206338	0.98841222		G	T	0.773	0.0012	0.63	0.00352	0.954	-0.00077	NA	NA
Appendicular lean mass	450,243 European ancestry individuals	1p36.12	1	23167501	LUZP1	LUZP1			ENSG00000169641	NA	NA	rs10683530	G	10683530	non_coding_transcript_exon_variant	0	0.5535	8e-24	23.0969	NA	0.019	[0.015-0.023] unit increase	23167500	G	GTC	0.445448	0.99984381		GTC	G	0.902	-6e-04	0.88	0.00088	0.587	-0.00596	NA	NA
Appendicular lean mass	450,243 European ancestry individuals	1q43	1	243483906	SDCCAG8	SDCCAG8			ENSG00000054282	NA	NA	rs2994330	T	2994330	intron_variant	0	0.197	7e-12	11.1549	NA	0.0163	[0.012-0.021] unit increase	243483906	G	T	0.197942	0.99413264		T	G	0.0742	-0.0114	0.0484	-0.01458	0.866	-0.00211	NA	NA
Appendicular lean mass	450,243 European ancestry individuals	1q44	1	244111153	AL590483.2	RN7SL148P - SPMIP3	ENSG00000244066	ENSG00000173728		6943	241482	rs114018835	T	114018835	intergenic_variant	1	0.0359	3e-09	8.52288	NA	0.0303	[0.02-0.04] unit increase	244111153	C	T	0.0372655	0.99521633		T	C	0.647	0.0062	0.887	-0.00226	0.265	0.02921	NA	NA
Appendicular lean mass	450,243 European ancestry individuals	1p36.11	1	26419708	LIN28A	LIN28A			ENSG00000131914	NA	NA	rs4274112	A	4274112	intron_variant	0	0.6267	2e-28	27.699	NA	0.0217	[0.018-0.026] unit increase	26419708	A	G	0.375162	0.99517691		G	A	0.831	0.001	0.917	0.00063	0.772	0.00307	NA	NA
Appendicular lean mass	450,243 European ancestry individuals	1p35.3	1	29269572	PTPRU	PTPRU			ENSG00000060656	NA	NA	rs6687475	C	6687475	intron_variant	0	0.7436	6e-12	11.2218	NA	0.0148	[0.01-0.019] unit decrease	29269572	G	C	0.742928	0.99884787		!C	C	0.172	0.0081	0.28	0.00729	0.381	0.01095	NA	NA
Appendicular lean mass	450,243 European ancestry individuals	1p35.2	1	31932289	PTP4A2	PTP4A2			ENSG00000184007	NA	NA	rs591833	A	591833	intron_variant	0	0.1334	4e-21	20.3979	NA	0.026	[0.021-0.031] unit increase	31932289	G	A	0.132481	0.99983707		A	G	0.266	0.0084	0.245	0.01006	0.842	0.00307	NA	NA
Appendicular lean mass	450,243 European ancestry individuals	1p34.3	1	35794836	intergenic	CLSPN - AGO4	ENSG00000092853	ENSG00000134698		24858	13180	rs182524742	T	182524742	intergenic_variant	1	0.011	3e-10	9.52288	NA	0.0578	[0.04-0.076] unit decrease	35794836	C	T	0.0117116	0.99924482		T	C	0.151	-0.0343	0.0709	-0.04978	0.787	0.01307	NA	NA
Appendicular lean mass	450,243 European ancestry individuals	1p34.3	1	36323945	EVA1B	SH3D21, EVA1B			ENSG00000214193, ENSG00000142694	NA	NA	rs12116935	A	12116935	5_prime_UTR_variant	0	0.614	2e-23	22.699	NA	0.0191	[0.015-0.023] unit increase	36323945	A	G	0.385814	0.99992762		G	A	6.19e-05	-0.0212	8.96e-05	-0.02363	0.235	-0.01307	1	1
Appendicular lean mass	450,243 European ancestry individuals	1p34.3	1	37990219	SF3A3	SF3A3 - RNU6-510P	ENSG00000183431	ENSG00000212541		144	1243	rs4360494	C	4360494	regulatory_region_variant	1	0.5541	8e-26	25.0969	NA	0.0198	[0.016-0.024] unit decrease	37990219	G	C	0.55506	0.99719834		!C	C	0.585	-0.0028	0.243	-0.00691	0.329	0.01038	NA	NA
Appendicular lean mass	450,243 European ancestry individuals	1p34.2	1	39611865	intergenic	PABPC4 - HEYL	ENSG00000090621	ENSG00000163909		35075	11570	rs61781391	A	61781391	intergenic_variant	1	0.2172	1e-11	11	NA	0.0154	[0.011-0.02] unit increase	39611865	G	A	0.21706	0.99967828		A	G	0.391	-0.0054	0.578	-0.00402	0.446	-0.0098	NA	NA
Appendicular lean mass	450,243 European ancestry individuals	1p34.2	1	40311080	COL9A2	COL9A2			ENSG00000049089	NA	NA	rs3737815	A	3737815	intron_variant	0	0.1684	2e-09	8.69897	NA	0.0151	[0.01-0.02] unit decrease	40311080	C	A	0.169713	0.99883089		A	C	0.00367	-0.0195	0.00743	-0.02099	0.234	-0.01537	1	1
Appendicular lean mass	205,513 European ancestry men	1p34.2	1	41075230	SCMH1	SCMH1			ENSG00000010803	NA	NA	rs143365597	A	143365597	missense_variant	0	0.004	4e-06	5.39794	NA	0.12	[0.071-0.169] unit increase	41075230	G	A	0.00444367	0.99195408		A	G	0.307	0.0351	0.702	-0.01697	0.0368	0.11377	NA	NA
Appendicular lean mass	450,243 European ancestry individuals	1p34.2	1	41075230	SCMH1	SCMH1			ENSG00000010803	NA	NA	rs143365597	A	143365597	missense_variant	0	0.0038	6e-18	17.2218	NA	0.1406	[0.11-0.17] unit increase	41075230	G	A	0.00444367	0.99195408		A	G	0.307	0.0351	0.702	-0.01697	0.0368	0.11377	NA	NA
Appendicular lean mass	244,730 European ancestry women	1p34.2	1	41075230	SCMH1	SCMH1			ENSG00000010803	NA	NA	rs143365597	A	143365597	missense_variant	0	0.004	1e-13	13	NA	0.16	[0.12-0.2] unit increase	41075230	G	A	0.00444367	0.99195408		A	G	0.307	0.0351	0.702	-0.01697	0.0368	0.11377	NA	NA
Appendicular lean mass	450,243 European ancestry individuals	1p34.2	1	41078607	SCMH1	SCMH1			ENSG00000010803	NA	NA	rs2885697	T	2885697	intron_variant	0	0.665	9e-60	59.0458	NA	0.0323	[0.028-0.036] unit decrease	41078607	G	T	0.664147	0.99998481		!T	T	3.19e-05	0.0225	0.000251	0.02275	0.0482	0.02172	1	1
Appendicular lean mass	450,243 European ancestry individuals	1p34.1	1	45575428	intergenic	AKR1A1 - NASP	ENSG00000117448	ENSG00000132780		5379	8418	rs1084086	T	1084086	regulatory_region_variant	1	0.2967	1e-12	12	NA	0.0146	[0.011-0.019] unit increase	45575428	T	G	0.702751	0.99989632		!G	G	0.555	-0.0034	0.805	-0.00163	0.444	-0.00903	NA	NA
Appendicular lean mass	450,243 European ancestry individuals	1p32.3	1	50782644	FAF1	FAF1			ENSG00000185104	NA	NA	rs12074850	A	12074850	intron_variant	0	0.9102	3e-33	32.5229	NA	0.0393	[0.033-0.046] unit decrease	50782644	A	G	0.0892758	0.99994277		G	A	0.887	-0.0013	0.565	-0.00591	0.483	0.0123	NA	NA
Appendicular lean mass	450,243 European ancestry individuals	1p32.3	1	51842029	NRDC	NRDC			ENSG00000078618	NA	NA	rs142478128	T	142478128	intron_variant	0	0.9713	2e-10	9.69897	NA	0.0374	[0.026-0.049] unit decrease	51842029	T	C	0.032182	0.99513681		C	T	0.23	0.0153	0.118	0.0259	0.963	0.00173	NA	NA
Appendicular lean mass	450,243 European ancestry individuals	1p32.2	1	56166683	AC119674.1	LINC01755 - RPSAP20	ENSG00000233079	ENSG00000229871		216564	40884	rs150188352	CAAT	150188352	intron_variant	1	0.1935	8e-38	37.0969	NA	0.0305	[0.026-0.035] unit increase	56166682	C	CAAT	0.192028	0.99938494		CAAT	C	0.135	0.0098	0.223	0.00905	0.369	0.01268	NA	NA
Appendicular lean mass	450,243 European ancestry individuals	1p31.3	1	63099482	intergenic	LINC01739 - LINC00466	ENSG00000229537	ENSG00000224209		76978	59601	rs80206427	T	80206427	intergenic_variant	1	0.965	2e-19	18.699	NA	0.0449	[0.035-0.055] unit decrease	63099482	T	C	0.0348618	0.99697352		C	T	0.0123	0.0354	0.0127	0.03985	0.524	0.01941	1	1
Appendicular lean mass	450,243 European ancestry individuals	1p31.3	1	63261871	LINC00466	LINC00466			ENSG00000224209	NA	NA	rs670318	T	670318	non_coding_transcript_exon_variant	0	0.0485	3e-21	20.5229	NA	0.0413	[0.033-0.05] unit decrease	63261871	T	C	0.950957	0.99465176		!C	C	0.782	0.0024	0.665	0.00591	0.98	-0.00058	NA	NA
Appendicular lean mass	450,243 European ancestry individuals	1p31.3	1	64833288	JAK1	JAK1			ENSG00000162434	NA	NA	rs9128	T	9128	3_prime_UTR_variant	0	0.0121	3e-25	24.5229	NA	0.0944	[0.077-0.112] unit increase	64833288	C	T	0.0133528	0.99113258		T	C	0.0037	0.0704	0.00664	0.07115	0.303	0.06611	1	1
Appendicular lean mass	450,243 European ancestry individuals	1p36.31	1	6599445	KLHL21	KLHL21			ENSG00000162413	NA	NA	rs2232460	A	2232460	synonymous_variant	0	0.3343	3e-13	12.5229	NA	0.0138	[0.01-0.018] unit increase	6599445	G	A	0.333601	0.99938532		A	G	0.639	-0.0024	0.577	-0.00352	0.907	-0.00135	NA	NA
Appendicular lean mass	450,243 European ancestry individuals	1p31.3	1	66957307	MIER1	MIER1			ENSG00000198160	NA	NA	rs2025609	C	2025609	intron_variant	0	0.1489	2e-12	11.699	NA	0.0186	[0.014-0.024] unit decrease	66957307	C	G	0.849362	0.9982087		!G	G	0.586	-0.0039	0.666	-0.00352	0.73	-0.005	NA	NA
Appendicular lean mass	450,243 European ancestry individuals	1p36.31	1	6798798	CAMTA1	CAMTA1			ENSG00000171735	NA	NA	rs11122154	A	11122154	intron_variant	0	0.1665	3e-15	14.5229	NA	0.02	[0.015-0.025] unit increase	6798798	T	A	0.173921	0.99934369		A	T	0.0911	0.0114	0.101	0.0127	0.602	0.0073	NA	NA
Appendicular lean mass	450,243 European ancestry individuals	1p31.1	1	73407202	intergenic	LINC01360 - LINC02238	ENSG00000233973	ENSG00000223479		51949	228014	rs7543202	A	7543202	intergenic_variant	1	0.3771	3e-11	10.5229	NA	0.0129	[0.0092-0.0166] unit decrease	73407202	A	G	0.619107	0.99992866		!G	G	0.377	-0.0047	0.164	-0.00842	0.492	0.00749	NA	NA
Appendicular lean mass	450,243 European ancestry individuals	1p31.1	1	73407202	intergenic	LINC01360 - LINC02238	ENSG00000233973	ENSG00000223479		51949	228014	rs7543202	A	7543202	intergenic_variant	1	0.3771	3e-11	10.5229	NA	0.0129	[0.0092-0.0166] unit decrease	73407202	A	T	0.0129964	0.99812909		T	A	0.553	0.0127	0.0799	0.04563	0.133	-0.05708	NA	NA
Appendicular lean mass	450,243 European ancestry individuals	1p31.1	1	77984833	DNAJB4	DNAJB4, GIPC2			ENSG00000162616, ENSG00000137960	NA	NA	rs34517439	A	34517439	intron_variant	0	0.1221	6e-48	47.2218	NA	0.0421	[0.036-0.048] unit increase	77984833	C	A	0.126498	0.99826906		A	C	9.71e-05	0.0303	0.000388	0.03181	0.0995	0.02575	1	1
Appendicular lean mass	450,243 European ancestry individuals	1p31.1	1	79010826	ADGRL4	ADGRL4			ENSG00000162618	NA	NA	rs12038026	T	12038026	intron_variant	0	0.765	2e-09	8.69897	NA	0.0133	[0.009-0.0176] unit decrease	79010826	T	C	0.23698	0.99623055		C	T	0.091	0.0104	0.226	0.00842	0.186	0.0173	NA	NA
Appendicular lean mass	450,243 European ancestry individuals	1p36.23	1	8416381	RERE	RERE			ENSG00000142599	NA	NA	rs301804	C	301804	intron_variant	0	0.6867	4e-17	16.3979	NA	0.0171	[0.013-0.021] unit increase	8416381	C	A	1.04829e-05	0.90703869		A	C	0.858	0.1261	0.858	0.12609	NA	NA	NA	NA
Appendicular lean mass	450,243 European ancestry individuals	1p36.23	1	8416381	RERE	RERE			ENSG00000142599	NA	NA	rs301804	C	301804	intron_variant	0	0.6867	4e-17	16.3979	NA	0.0171	[0.013-0.021] unit increase	8416381	C	G	0.317711	0.99750637		G	C	0.393	-0.0047	0.421	-0.00503	0.758	-0.00346	NA	NA
Appendicular lean mass	450,243 European ancestry individuals	1p36.23	1	8416381	RERE	RERE			ENSG00000142599	NA	NA	rs301804	C	301804	intron_variant	0	0.6867	4e-17	16.3979	NA	0.0171	[0.013-0.021] unit increase	8416381	C	T	0.000526255	0.93761429		T	C	0.937	0.0091	0.353	0.12898	0.217	-0.25367	NA	NA
Appendicular lean mass	244,730 European ancestry women	1p22.3	1	85582843	CCN1	CCN1			ENSG00000142871	NA	NA	rs148330006	C	148330006	missense_variant	0	0.992	2e-07	6.69897	NA	0.07	[0.045-0.095] unit increase	85582843	C	G	0.00877171	0.99705466		G	C	0.000241	-0.1037	0.00328	-0.09416	0.0221	-0.13721	1	1
Appendicular lean mass	450,243 European ancestry individuals	1p22.3	1	85582843	CCN1	CCN1			ENSG00000142871	NA	NA	rs148330006	C	148330006	missense_variant	0	0.9916	5e-12	11.301	NA	0.0686	[0.049-0.088] unit increase	85582843	C	G	0.00877171	0.99705466		G	C	0.000241	-0.1037	0.00328	-0.09416	0.0221	-0.13721	1	1
Appendicular lean mass	205,513 European ancestry men	1p22.3	1	85582843	CCN1	CCN1			ENSG00000142871	NA	NA	rs148330006	C	148330006	missense_variant	0	0.992	5e-06	5.30103	NA	0.07	[0.041-0.099] unit increase	85582843	C	G	0.00877171	0.99705466		G	C	0.000241	-0.1037	0.00328	-0.09416	0.0221	-0.13721	1	1
Appendicular lean mass	450,243 European ancestry individuals	1p22.3	1	85760669	COL24A1	COL24A1			ENSG00000171502	NA	NA	rs17400787	A	17400787	intron_variant	0	0.1777	5e-11	10.301	NA	0.0162	[0.011-0.021] unit decrease	85760669	G	A	0.179582	0.99661837		A	G	0.863	-0.0011	0.814	0.00176	0.422	-0.01115	NA	NA
Appendicular lean mass	450,243 European ancestry individuals	1p22.2	1	88706049	PKN2	PKN2			ENSG00000065243	NA	NA	rs71584924	T	71584924	intron_variant	0	0.4555	1e-17	17	NA	0.0161	[0.012-0.02] unit decrease	88706048	T	TG	0.541456	0.99972284		!TG	TG	0.808	-0.0013	0.523	-0.00377	0.51	0.00711	NA	NA
Appendicular lean mass	450,243 European ancestry individuals	1p22.1	1	91851016	TGFBR3	TGFBR3			ENSG00000069702	NA	NA	rs11590254	A	11590254	intron_variant	0	0.6886	4e-20	19.3979	NA	0.0186	[0.015-0.023] unit decrease	91851016	A	T	0.311933	0.9985918		T	A	0.000923	0.0182	0.00157	0.01986	0.26	0.01288	1	1
Appendicular lean mass	450,243 European ancestry individuals	1p22.1	1	92918115	DIPK1A	DIPK1A			ENSG00000154511	NA	NA	rs12733767	T	12733767	intron_variant	0	0.1024	9e-14	13.0458	NA	0.0233	[0.017-0.029] unit decrease	92918115	C	T	0.103917	0.99812592		T	C	0.00897	-0.0224	0.024	-0.02175	0.185	-0.02517	1	1
Appendicular lean mass	450,243 European ancestry individuals	10q24.33	10	103431640	PDCD11	PDCD11			ENSG00000148843	NA	NA	rs35327241	T	35327241	intron_variant	0	0.4198	2e-14	13.699	NA	0.0149	[0.011-0.019] unit decrease	103431639	TA	T	2.58155e-05	0.90374245		T	TA	0.0824	0.9989	0.0824	0.99892	NA	NA	NA	NA
Appendicular lean mass	450,243 European ancestry individuals	10q25.3	10	113434191	intergenic	RNU7-165P - PPIAP39	ENSG00000238380	ENSG00000230018		80707	48425	rs11421589	CT	11421589	regulatory_region_variant	1	0.5556	6e-10	9.22185	NA	0.0119	[0.0082-0.0156] unit increase	113434190	C	CT	0.555519	0.99900105		!CT	CT	0.186	-0.0068	0.218	-0.00729	0.611	-0.00538	NA	NA
Appendicular lean mass	450,243 European ancestry individuals	10q26.11	10	118668447	intergenic	TOMM22P5 - CACUL1	ENSG00000225155	ENSG00000151893		24249	5720	rs1247121	A	1247121	regulatory_region_variant	1	0.4337	2e-20	19.699	NA	0.0177	[0.014-0.021] unit increase	118668447	A	G	0.567119	0.99869932		!G	G	0.149	0.0075	0.085	0.01018	0.899	-0.00135	NA	NA
Appendicular lean mass	450,243 European ancestry individuals	10q26.11	10	119370285	GRK5	GRK5			ENSG00000198873	NA	NA	rs291979	A	291979	intron_variant	0	0.2289	7e-27	26.1549	NA	0.0242	[0.02-0.029] unit increase	119370285	G	A	0.229135	0.99897258		A	G	0.284	0.0065	0.413	0.00566	0.463	0.00922	NA	NA
Appendicular lean mass	450,243 European ancestry individuals	10q26.11	10	119408747	GRK5	GRK5			ENSG00000198873	NA	NA	rs10437498	A	10437498	intron_variant	0	0.6446	3e-10	9.52288	NA	0.012	[0.0083-0.0157] unit decrease	119408747	A	G	0.35758	0.99852009		G	A	0.21	0.0067	0.201	0.00779	0.784	0.00307	NA	NA
Appendicular lean mass	450,243 European ancestry individuals	10q26.11	10	119408747	GRK5	GRK5			ENSG00000198873	NA	NA	rs10437498	A	10437498	intron_variant	0	0.6446	3e-10	9.52288	NA	0.012	[0.0083-0.0157] unit decrease	119408747	A	T	1.33299e-05	0.97088177		T	A	0.236	1.1813	0.236	1.18133	NA	NA	NA	NA
Appendicular lean mass	450,243 European ancestry individuals	10q26.11	10	119898024	SEC23IP	SEC23IP			ENSG00000107651	NA	NA	rs75356180	A	75356180	intron_variant	0	0.8802	1e-10	10	NA	0.0187	[0.013-0.024] unit increase	119898024	A	T	0.150066	0.99844539		T	A	0.917	8e-04	0.56	0.00478	0.356	-0.01499	NA	NA
Appendicular lean mass	450,243 European ancestry individuals	10q26.13	10	122371660	PLEKHA1	RNU6-728P - PLEKHA1	ENSG00000202245	ENSG00000107679		25867	3036	rs4752689	A	4752689	intergenic_variant	1	0.5839	1e-26	26	NA	0.0205	[0.017-0.024] unit increase	122371660	G	A	0.58332	0.99958878		!A	A	0.000152	-0.0197	0.000545	-0.02062	0.115	-0.01691	1	1
Appendicular lean mass	450,243 European ancestry individuals	10q26.13	10	123890854	CPXM2	CPXM2			ENSG00000121898	NA	NA	rs28445838	A	28445838	intron_variant	0	0.6075	3e-11	10.5229	NA	0.0129	[0.0092-0.0166] unit increase	123890854	A	G	0.393278	0.99890138		G	A	0.592	-0.0028	0.408	0.00503	0.0109	-0.02729	NA	NA
Appendicular lean mass	450,243 European ancestry individuals	10q26.13	10	124923942	AL731577.2	NPM1P31 - ZRANB1	ENSG00000214807	ENSG00000019995		55616	18181	rs11424084	CA	11424084	intron_variant	1	0.1403	7e-17	16.1549	NA	0.0228	[0.018-0.028] unit increase	124923941	CAAAA	CA	1.38021e-05	0.96769384		CA	CAAAA	0.213	0.8775	0.213	0.87748	NA	NA	NA	NA
Appendicular lean mass	450,243 European ancestry individuals	10q26.2	10	126060220	ADAM12	ADAM12			ENSG00000148848	NA	NA	rs4962504	A	4962504	intron_variant	0	0.1162	2e-10	9.69897	NA	0.0189	[0.013-0.025] unit decrease	126060220	G	A	0.113392	0.99805542		A	G	0.521	-0.0052	0.583	-0.00503	0.739	-0.00557	NA	NA
Appendicular lean mass	450,243 European ancestry individuals	10q26.2	10	128575498	intergenic	LINC01163 - LINC02667	ENSG00000280953	ENSG00000224190		257772	337312	rs11408311	CT	11408311	intergenic_variant	1	0.4522	1e-11	11	NA	0.0127	[0.009-0.0164] unit increase	128575497	CT	C	0.000225509	0.93455382		C	CT	0.741	0.0745	0.741	0.07455	NA	NA	NA	NA
Appendicular lean mass	450,243 European ancestry individuals	10p13	10	12901108	CCDC3	CCDC3			ENSG00000151468	NA	NA	rs35092545	T	35092545	intron_variant	0	0.2896	6e-12	11.2218	NA	0.0144	[0.01-0.019] unit decrease	12901108	G	T	0.290802	0.99742455		T	G	0.53	-0.0036	0.112	-0.01031	0.102	0.01979	NA	NA
Appendicular lean mass	450,243 European ancestry individuals	10p12.1	10	24717003	ARHGAP21	ARHGAP21			ENSG00000107863	NA	NA	rs7087801	T	7087801	intron_variant	0	0.2979	8e-14	13.0969	NA	0.0151	[0.011-0.019] unit decrease	24717003	C	T	0.298438	0.99973401		T	C	0.892	8e-04	0.79	-0.00176	0.453	0.00884	NA	NA
Appendicular lean mass	450,243 European ancestry individuals	10p12.1	10	24889935	PRTFDC1	PRTFDC1			ENSG00000099256	NA	NA	rs11014285	A	11014285	intron_variant	0	0.1654	3e-40	39.5229	NA	0.0342	[0.029-0.039] unit increase	24889935	G	A	0.166407	0.99277975		A	G	0.373	0.0062	0.0868	0.01345	0.169	-0.02095	NA	NA
Appendicular lean mass	450,243 European ancestry individuals	10p12.1	10	27611953	intergenic	LINC02680 - MKX	ENSG00000285737	ENSG00000150051		17365	60921	rs2808290	T	2808290	intergenic_variant	1	0.5029	2e-21	20.699	NA	0.018	[0.014-0.022] unit increase	27611953	C	T	0.504127	0.99733174		!T	T	0.918	5e-04	0.391	-0.00503	0.078	0.01864	NA	NA
Appendicular lean mass	450,243 European ancestry individuals	10p12.1	10	28677304	BAMBI	RNU6-1067P - BAMBI	ENSG00000207483	ENSG00000095739		9279	206	rs71492575	A	71492575	regulatory_region_variant	1	0.6477	1e-23	23	NA	0.0206	[0.016-0.025] unit increase	28677304	A	C	0.34983	0.99444436		C	A	0.64	-0.0025	0.691	-0.00239	0.803	-0.00269	NA	NA
Appendicular lean mass	450,243 European ancestry individuals	10p11.21	10	34246093	PARD3	PARD3			ENSG00000148498	NA	NA	rs1778871	C	1778871	intron_variant	0	0.8811	6e-11	10.2218	NA	0.0191	[0.013-0.025] unit increase	34246093	C	G	0.118064	0.99793404		G	C	0.082	0.014	0.325	0.00893	0.0596	0.03305	NA	NA
Appendicular lean mass	450,243 European ancestry individuals	10p11.21	10	34246093	PARD3	PARD3			ENSG00000148498	NA	NA	rs1778871	C	1778871	intron_variant	0	0.8811	6e-11	10.2218	NA	0.0191	[0.013-0.025] unit increase	34246093	C	T	0	nan		NA	NA	NA	NA	NA	NA	NA	NA	NA	NA
Appendicular lean mass	450,243 European ancestry individuals	10p11.21	10	37413507	intergenic	VN1R53P - TACC1P1	ENSG00000236313	ENSG00000224920		63935	109504	rs2490302	A	2490302	intergenic_variant	1	0.9137	6e-11	10.2218	NA	0.0221	[0.015-0.029] unit increase	37413507	T	A	0.913424	0.99945317		!A	A	0.303	-0.0095	0.639	0.0049	0.00252	-0.05804	NA	NA
Appendicular lean mass	450,243 European ancestry individuals	10p15.1	10	4919086	intergenic	AKR1C6P - U8	ENSG00000151631	ENSG00000212144		27111	43350	rs35288270	T	35288270	intergenic_variant	1	0.8656	3e-32	31.5229	NA	0.0328	[0.027-0.038] unit increase	4919086	T	C	0.134812	0.99331848		C	T	0.0945	-0.0126	0.368	-0.00779	0.0716	-0.02748	NA	NA
Appendicular lean mass	450,243 European ancestry individuals	10q11.23	10	49334313	intergenic	C10orf71 - DRGX	ENSG00000177354	ENSG00000165606		6821	29753	rs10776560	T	10776560	intergenic_variant	1	0.4995	8e-17	16.0969	NA	0.0157	[0.012-0.019] unit decrease	49334313	C	T	0.499763	0.9997863		!T	T	0.000986	0.0168	0.0123	0.01458	0.0223	0.02421	1	1
Appendicular lean mass	450,243 European ancestry individuals	10q11.23	10	50993120	PRKG1	PRKG1			ENSG00000185532	NA	NA	rs10822055	A	10822055	intron_variant	0	0.2349	2e-15	14.699	NA	0.0177	[0.013-0.022] unit decrease	50993120	T	A	0.235295	0.99983484		A	T	0.00309	-0.0177	0.00851	-0.0181	0.174	-0.01633	1	1
Appendicular lean mass	450,243 European ancestry individuals	10q21.1	10	51531231	PRKG1	PRKG1			ENSG00000185532	NA	NA	rs61849823	T	61849823	intron_variant	0	0.8357	3e-14	13.5229	NA	0.0195	[0.014-0.025] unit decrease	51531231	T	C	0.164097	0.99730095		C	T	0.461	0.0052	0.171	0.01094	0.335	-0.01403	NA	NA
Appendicular lean mass	450,243 European ancestry individuals	10q21.1	10	52062091	PRKG1	PRKG1			ENSG00000185532	NA	NA	rs77974561	A	77974561	intron_variant	0	0.0546	2e-11	10.699	NA	0.0281	[0.02-0.036] unit decrease	52062091	C	A	0.0548874	0.9989641		A	C	0.598	-0.0059	0.603	-0.00666	0.88	-0.00346	NA	NA
Appendicular lean mass	450,243 European ancestry individuals	10q21.1	10	52701023	LNCAROD	LNCAROD			ENSG00000231131	NA	NA	rs12218358	C	12218358	intron_variant	0	0.5639	6e-10	9.22185	NA	0.0118	[0.0081-0.0155] unit increase	52701023	G	C	0.564569	0.99735092		!C	C	0.721	-0.0018	0.25	-0.00679	0.178	0.01441	NA	NA
Appendicular lean mass	450,243 European ancestry individuals	10q21.2	10	59709780	SLC16A9	SLC16A9			ENSG00000165449	NA	NA	rs1171614	T	1171614	5_prime_UTR_variant	0	0.2309	1e-13	13	NA	0.0167	[0.012-0.021] unit increase	59709780	T	C	0.76857	0.99324915		!C	C	0.85	0.0012	0.312	0.00704	0.151	-0.01806	NA	NA
Appendicular lean mass	450,243 European ancestry individuals	10q21.2	10	60401075	ANK3	ANK3			ENSG00000151150	NA	NA	rs10761494	A	10761494	intron_variant	0	0.3617	3e-14	13.5229	NA	0.015	[0.011-0.019] unit decrease	60401075	A	T	0.637218	0.99872856		!T	T	0.00207	-0.0164	0.000152	-0.02301	0.625	0.00538	NA	1
Appendicular lean mass	450,243 European ancestry individuals	10q21.2	10	62022065	ARID5B	ARID5B			ENSG00000150347	NA	NA	rs67527161	T	67527161	intron_variant	0	0.791	6e-15	14.2218	NA	0.0182	[0.014-0.023] unit increase	62022065	T	C	0.207502	0.99812542		C	T	0.376	-0.0056	0.178	-0.00968	0.539	0.00807	NA	NA
Appendicular lean mass	450,243 European ancestry individuals	10q21.2	10	62765232	AC067751.1	ALDH7A1P4 - ADO	ENSG00000234489	ENSG00000181915		23847	39488	rs224043	T	224043	intron_variant	1	0.5677	1e-17	17	NA	0.0163	[0.013-0.02] unit decrease	62765232	G	T	0.569648	0.99918675		!T	T	0.0373	0.0108	0.0402	0.01207	0.56	0.00634	1	1
Appendicular lean mass	450,243 European ancestry individuals	10q21.3	10	67956326	HERC4	HERC4			ENSG00000148634	NA	NA	rs117880827	T	117880827	non_coding_transcript_exon_variant	0	0.9176	2e-09	8.69897	NA	0.0208	[0.014-0.027] unit increase	67956326	T	C	0.083466	0.99947018		C	T	0.0455	-0.0185	0.00383	-0.03055	0.279	0.02056	1	1
Appendicular lean mass	450,243 European ancestry individuals	10q21.3	10	68174212	MYPN	MYPN			ENSG00000138347	NA	NA	rs7916821	A	7916821	missense_variant	0	0.4945	4e-21	20.3979	NA	0.0184	[0.014-0.022] unit increase	68174212	G	A	0.497311	0.99990295		!A	A	0.00247	0.0154	0.147	0.00842	0.00027	0.03843	NA	1
Appendicular lean mass	205,513 European ancestry men	10q21.3	10	68174212	MYPN	MYPN			ENSG00000138347	NA	NA	rs7916821	A	7916821	missense_variant	0	0.495	4e-14	13.3979	NA	0.02	[0.014-0.026] unit increase	68174212	G	A	0.497311	0.99990295		!A	A	0.00247	0.0154	0.147	0.00842	0.00027	0.03843	NA	1
Appendicular lean mass	244,730 European ancestry women	10q21.3	10	68174212	MYPN	MYPN			ENSG00000138347	NA	NA	rs7916821	A	7916821	missense_variant	0	0.495	4e-09	8.39794	NA	0.02	[0.014-0.026] unit increase	68174212	G	A	0.497311	0.99990295		!A	A	0.00247	0.0154	0.147	0.00842	0.00027	0.03843	NA	1
Appendicular lean mass	450,243 European ancestry individuals	10q21.3	10	68639352	TET1	TET1			ENSG00000138336	NA	NA	rs7095472	A	7095472	intron_variant	0	0.4665	8e-45	44.0969	NA	0.0267	[0.023-0.03] unit decrease	68639352	A	G	0.533551	0.9965398		!G	G	1.55e-05	-0.0222	0.000417	-0.02074	0.0109	-0.0269	NA	1
Appendicular lean mass	450,243 European ancestry individuals	10q22.1	10	70672291	ADAMTS14	PALD1 - ADAMTS14	ENSG00000107719	ENSG00000138316		3537	215	rs68049170	A	68049170	regulatory_region_variant	1	0.2764	3e-34	33.5229	NA	0.0259	[0.022-0.03] unit decrease	70672291	G	A	0.277637	0.99879768		A	G	0.396	-0.0049	0.649	-0.00302	0.364	-0.01038	NA	NA
Appendicular lean mass	450,243 European ancestry individuals	10q22.2	10	75458469	LRMDA	LRMDA			ENSG00000148655	NA	NA	rs58628285	G	58628285	intron_variant	0	0.4397	1e-27	27	NA	0.0209	[0.017-0.025] unit increase	75458468	G	GCCCT	0.55878	0.99767378		GCCCT	G	0.0635	-0.0096	0.161	-0.0083	0.193	-0.01403	NA	NA
Appendicular lean mass	450,243 European ancestry individuals	10q22.3	10	77783982	AL450306.1	IMPDH1P5 - DLG5	ENSG00000213513	ENSG00000151208		2106	6809	rs117543413	T	117543413	intron_variant	1	0.0176	2e-21	20.699	NA	0.0689	[0.055-0.083] unit decrease	77783982	C	T	0.0181386	0.99890942		T	C	0.0886	-0.0354	0.197	-0.02891	0.178	-0.0738	NA	NA
Appendicular lean mass	450,243 European ancestry individuals	10q22.3	10	79358708	PPIF	PPIF - ZCCHC24	ENSG00000108179	ENSG00000165424		3374	23617	rs10824747	T	10824747	TF_binding_site_variant	1	0.4994	5e-19	18.301	NA	0.0168	[0.013-0.021] unit increase	79358708	T	C	0.499284	0.99892262		C	T	0.91	6e-04	0.828	-0.00126	0.519	0.00692	NA	NA
Appendicular lean mass	450,243 European ancestry individuals	10q22.3	10	79468622	intergenic	ZCCHC24 - TPRX1P1	ENSG00000165424	ENSG00000259021		22998	31044	rs7910211	T	7910211	intergenic_variant	1	0.8413	1e-11	11	NA	0.0166	[0.012-0.021] unit decrease	79468622	T	C	0.155757	0.99901215		C	T	0.762	-0.0022	0.653	-0.00365	0.806	0.00423	NA	NA
Appendicular lean mass	450,243 European ancestry individuals	10q23.31	10	88063813	intergenic	MED6P1 - RNLS	ENSG00000227905	ENSG00000184719		13990	210051	rs4934377	A	4934377	regulatory_region_variant	1	0.7297	7e-16	15.1549	NA	0.0172	[0.013-0.021] unit decrease	88063813	T	A	0.730374	0.99982838		!A	A	0.014	0.0143	0.115	0.01043	0.0245	0.02748	1	1
Appendicular lean mass	450,243 European ancestry individuals	10q23.32	10	91255322	PCGF5	PCGF5			ENSG00000180628	NA	NA	rs2648725	A	2648725	intron_variant	0	0.2134	8e-13	12.0969	NA	0.0165	[0.012-0.021] unit increase	91255322	T	A	0.215468	0.99943547		A	T	0.515	0.0041	0.845	-0.00138	0.0796	0.02325	NA	NA
Appendicular lean mass	450,243 European ancestry individuals	10q23.33	10	94831527	CYP2C19	CYP2C19			ENSG00000165841	NA	NA	rs4917612	C	4917612	intron_variant	0	0.8665	5e-33	32.301	NA	0.0336	[0.028-0.039] unit decrease	94831527	C	G	0.135984	0.99975532		G	C	0.11	0.0116	0.278	0.0093	0.202	0.01749	NA	NA
Appendicular lean mass	450,243 European ancestry individuals	10q24.1	10	96801112	intergenic	RPL13AP5 - MIR607	ENSG00000236552	ENSG00000207976		50213	27557	rs9419827	A	9419827	intergenic_variant	1	0.0665	2e-10	9.69897	NA	0.0264	[0.018-0.035] unit increase	96801112	G	A	0.000986863	0.88363723		A	G	0.678	-0.0308	0.95	0.00603	0.0532	-0.59958	NA	NA
Appendicular lean mass	450,243 European ancestry individuals	11q22.1	11	100739815	ARHGAP42	ARHGAP42			ENSG00000165895	NA	NA	rs604723	T	604723	intron_variant	0	0.2752	8e-15	14.0969	NA	0.0166	[0.012-0.021] unit increase	100739815	T	C	0.725327	0.9974013		!C	C	0.596	-0.003	0.798	-0.00163	0.519	-0.00769	NA	NA
Appendicular lean mass	450,243 European ancestry individuals	11p15.4	11	10282392	SBF2	SBF2			ENSG00000133812	NA	NA	rs11042717	T	11042717	intron_variant	0	0.5104	4e-53	52.3979	NA	0.029	[0.025-0.033] unit increase	10282392	T	C	0.493269	0.99920136		C	T	0.000437	-0.018	0.0142	-0.01433	0.00467	-0.02979	1	1
Appendicular lean mass	450,243 European ancestry individuals	11p15.4	11	10384917	AMPD3	AMPD3			ENSG00000133805	NA	NA	rs12226039	T	12226039	intron_variant	0	0.5724	2e-14	13.699	NA	0.0151	[0.011-0.019] unit increase	10384917	T	C	0.500044	0.99903597		C	T	0.751	0.0017	0.784	0.00163	0.872	0.00173	NA	NA
Appendicular lean mass	450,243 European ancestry individuals	11q23.3	11	120422429	ARHGEF12	ARHGEF12			ENSG00000196914	NA	NA	rs11217863	A	11217863	intron_variant	0	0.1162	1e-19	19	NA	0.0268	[0.021-0.033] unit decrease	120422429	G	A	0.115704	0.99977784		A	G	0.39	-0.0069	0.389	-0.00792	0.827	-0.00365	NA	NA
Appendicular lean mass	450,243 European ancestry individuals	11q24.2	11	125955329	VSIG10L2	VSIG10L2			ENSG00000283703	NA	NA	rs12222197	T	12222197	intron_variant	0	0.5812	7e-11	10.1549	NA	0.0125	[0.0088-0.0162] unit increase	125955329	G	T	0.580971	0.99817686		!T	T	0.358	-0.0048	0.458	-0.0044	0.578	-0.00596	NA	NA
Appendicular lean mass	450,243 European ancestry individuals	11p15.1	11	17476510	ABCC8	ABCC8			ENSG00000006071	NA	NA	rs77889556	A	77889556	intron_variant	0	0.1674	1e-16	16	NA	0.022	[0.017-0.027] unit increase	17476510	G	A	0.167495	0.98340885		A	G	0.00885	0.0185	0.01	0.02024	0.491	0.01115	1	1
Appendicular lean mass	450,243 European ancestry individuals	11p15.1	11	18642694	intergenic	SPTY2D1 - SRSF3P1	ENSG00000179119	ENSG00000257043		7903	22356	rs10832963	T	10832963	intergenic_variant	1	0.2555	9e-21	20.0458	NA	0.0203	[0.016-0.025] unit increase	18642694	T	G	0.745502	0.99854661		!G	G	0.509	0.0038	0.304	0.00691	0.653	-0.00519	NA	NA
Appendicular lean mass	450,243 European ancestry individuals	11p15.5	11	1921984	TNNT3	TNNT3			ENSG00000130595	NA	NA	rs2734498	T	2734498	intron_variant	0	0.5798	5e-15	14.301	NA	0.0143	[0.011-0.018] unit increase	1921984	C	T	0.577519	0.99805612		!T	T	0.575	-0.0024	0.949	0.00038	0.112	-0.01749	NA	NA
Appendicular lean mass	450,243 European ancestry individuals	11p15.5	11	2144346	INS-IGF2	IGF2-AS, IGF2, INS-IGF2			ENSG00000099869, ENSG00000167244, ENSG00000129965	NA	NA	rs35506085	A	35506085	intron_variant	0	0.1847	7e-35	34.1549	NA	0.0303	[0.025-0.035] unit decrease	2144346	G	A	0.182549	0.9968469		A	G	0.865	8e-04	0.787	0.00201	0.971	-0.00058	NA	NA
Appendicular lean mass	450,243 European ancestry individuals	11p15.5	11	2644127	KCNQ1	KCNQ1OT1, KCNQ1			ENSG00000269821, ENSG00000053918	NA	NA	rs74501871	A	74501871	non_coding_transcript_exon_variant	0	0.9063	2e-25	24.699	NA	0.0336	[0.027-0.04] unit increase	2644127	A	G	0.0925223	0.99819061		G	A	1.65e-07	-0.0462	4.06e-05	-0.04136	0.000671	-0.06226	1	1
Appendicular lean mass	450,243 European ancestry individuals	11p14.1	11	27755332	AC103796.1	BDNF - CBX3P1	ENSG00000176697	ENSG00000177447		33274	51111	rs117130980	T	117130980	intron_variant	1	0.9872	1e-10	10	NA	0.0572	[0.04-0.075] unit increase	27755332	T	C	0.0125256	0.98924575		C	T	0.0789	-0.0419	0.0945	-0.04413	0.565	-0.0319	NA	NA
Appendicular lean mass	450,243 European ancestry individuals	11p15.5	11	2787966	KCNQ1	KCNQ1			ENSG00000053918	NA	NA	rs12271773	A	12271773	intron_variant	0	0.1159	3e-17	16.5229	NA	0.025	[0.019-0.031] unit increase	2787966	G	A	0.117403	0.99754727		A	G	0.694	0.003	0.404	0.00754	0.531	-0.00942	NA	NA
Appendicular lean mass	450,243 European ancestry individuals	11p15.5	11	2792092	KCNQ1	KCNQ1			ENSG00000053918	NA	NA	rs143840904	T	143840904	intron_variant	0	0.0197	1e-30	30	NA	0.0807	[0.067-0.094] unit decrease	2792092	C	T	0.0198399	0.99020564		T	C	0.401	-0.0158	0.122	-0.03281	0.252	0.04651	NA	NA
Appendicular lean mass	450,243 European ancestry individuals	11p14.1	11	28556320	intergenic	METTL15 - LINC02758	ENSG00000169519	ENSG00000248990		29279	122863	rs7396827	T	7396827	intergenic_variant	1	0.464	1e-12	12	NA	0.0136	[0.0099-0.0173] unit increase	28556320	T	C	0.536782	0.99835259		!C	C	0.274	0.0056	0.321	0.00578	0.641	0.005	NA	NA
Appendicular lean mass	450,243 European ancestry individuals	11p14.1	11	30426451	MPPED2	MPPED2			ENSG00000066382	NA	NA	rs704660	T	704660	intron_variant	0	0.4095	2e-15	14.699	NA	0.0153	[0.012-0.019] unit increase	30426451	C	T	0.409582	0.99825304		T	C	0.212	0.0051	0.0648	0.01094	0.938	-0.00077	NA	NA
Appendicular lean mass	450,243 European ancestry individuals	11p11.2	11	46119871	PHF21A	PHF21A			ENSG00000135365	NA	NA	rs148683230	A	148683230	intron_variant	0	0.149	4e-12	11.3979	NA	0.0185	[0.013-0.024] unit increase	46119871	G	A	0.150852	0.99844351		A	G	0.00552	0.0196	0.0698	0.01483	0.0161	0.03401	1	1
Appendicular lean mass	450,243 European ancestry individuals	11p11.2	11	46628169	ATG13	ATG13			ENSG00000175224	NA	NA	rs113542381	A	113542381	intron_variant	0	0.1461	2e-11	10.699	NA	0.018	[0.013-0.023] unit decrease	46628169	G	A	0.14587	0.99961268		A	G	0.788	-0.0021	0.884	0.00126	0.363	-0.01595	NA	NA
Appendicular lean mass	450,243 European ancestry individuals	11p11.2	11	48641674	intergenic	OR4A44P - ANKRD33BP2	ENSG00000255053	ENSG00000254728		13181	240049	rs531370782	CT	531370782	intergenic_variant	1	0.0048	6e-11	10.2218	NA	0.1398	[0.098-0.182] unit increase	48641673	CT	C	0	nan		NA	NA	NA	NA	NA	NA	NA	NA	NA	NA
Appendicular lean mass	450,243 European ancestry individuals	11p11.12	11	49280089	intergenic	FOLH1 - NOX4P1	ENSG00000086205	ENSG00000255532		71451	25625	rs1164660	T	1164660	intergenic_variant	1	0.5825	5e-15	14.301	NA	0.0158	[0.012-0.02] unit decrease	49280089	G	T	0.585378	0.9800402		!T	T	0.181	0.0069	0.204	0.00754	0.64	0.005	NA	NA
Appendicular lean mass	450,243 European ancestry individuals	11q12.1	11	56103792	OR8H2	OR8H2			ENSG00000181767	NA	NA	rs117292441	T	117292441	5_prime_UTR_variant	0	0.0125	3e-10	9.52288	NA	0.0544	[0.037-0.071] unit increase	56103792	G	T	0.0128416	0.99240598		T	G	0.837	0.0046	0.168	0.0352	0.036	-0.09839	NA	NA
Appendicular lean mass	450,243 European ancestry individuals	11q12.2	11	61822009	FADS1	FADS1, FADS2			ENSG00000149485, ENSG00000134824	NA	NA	rs28456	A	28456	intron_variant	0	0.6863	4e-12	11.3979	NA	0.0142	[0.01-0.018] unit increase	61822009	A	G	0.315266	0.99981013		G	A	0.982	1e-04	0.615	-0.00314	0.349	0.01038	NA	NA
Appendicular lean mass	450,243 European ancestry individuals	11q12.3	11	62617896	B3GAT3	B3GAT3			ENSG00000149541	NA	NA	rs7122950	T	7122950	intron_variant	0	0.2886	8e-10	9.09691	NA	0.0129	[0.0088-0.017] unit increase	62617896	C	T	0.290172	0.99904273		T	C	0.0528	0.0108	0.0915	0.01081	0.342	0.01095	NA	NA
Appendicular lean mass	450,243 European ancestry individuals	11q13.1	11	65272965	POLA2	POLA2			ENSG00000014138	NA	NA	rs601310	T	601310	intron_variant	0	0.7513	3e-10	9.52288	NA	0.0138	[0.0095-0.0181] unit increase	65272965	C	T	0.750701	0.99992312		!T	T	0.293	-0.006	0.877	-0.00101	0.0595	-0.0221	NA	NA
Appendicular lean mass	450,243 European ancestry individuals	11q13.2	11	67220577	KDM2A	KDM2A			ENSG00000173120	NA	NA	rs12790261	A	12790261	intron_variant	0	0.0827	6e-40	39.2218	NA	0.0455	[0.039-0.052] unit decrease	67220577	C	A	0.0833021	0.99980764		A	C	0.000256	-0.0338	0.00488	-0.02967	0.0133	-0.04785	1	1
Appendicular lean mass	450,243 European ancestry individuals	11q13.2	11	68255564	intergenic	KMT5B - C11orf24	ENSG00000110066	ENSG00000171067		41712	5774	rs11228182	A	11228182	intergenic_variant	1	0.2958	2e-09	8.69897	NA	0.0123	[0.0084-0.0162] unit increase	68255564	G	A	0.293759	0.99847025		A	G	0.0601	0.0106	0.0108	0.01634	0.433	-0.00942	NA	NA
Appendicular lean mass	450,243 European ancestry individuals	11q13.2	11	68620752	AP003096.1	PPP6R3 - GAL	ENSG00000110075	ENSG00000069482		5418	63027	rs7129320	A	7129320	intergenic_variant	1	0.1661	7e-53	52.1549	NA	0.0389	[0.034-0.044] unit decrease	68620752	G	A	0.16732	0.9992997		A	G	0.0165	-0.0162	0.00381	-0.02275	0.851	0.0025	1	1
Appendicular lean mass	450,243 European ancestry individuals	11q13.3	11	69321751	MYEOV	MYEOV			ENSG00000172927	NA	NA	rs28378931	A	28378931	intron_variant	0	0.8934	7e-17	16.1549	NA	0.0245	[0.019-0.03] unit decrease	69321751	A	G	0.106615	0.99768403		G	A	0.0529	0.0164	0.106	0.01534	0.276	0.02037	NA	NA
Appendicular lean mass	450,243 European ancestry individuals	11q13.3	11	69488959	LINC01488	LINC01488			ENSG00000285094	NA	NA	rs10796820	T	10796820	intron_variant	0	0.529	3e-22	21.5229	NA	0.0184	[0.015-0.022] unit decrease	69488959	G	T	0.529211	0.99797479		T	G	0.0152	-0.0124	0.0481	-0.01157	0.149	-0.01537	1	1
Appendicular lean mass	450,243 European ancestry individuals	11q13.3	11	69671476	LTO1	LTO1			ENSG00000149716	NA	NA	rs1789167	A	1789167	3_prime_UTR_variant	0	0.3467	4e-13	12.3979	NA	0.0149	[0.011-0.019] unit decrease	69671476	A	G	0.653274	0.99905277		!G	G	1.11e-05	-0.0238	4.38e-05	-0.02502	0.0942	-0.01941	NA	1
Appendicular lean mass	450,243 European ancestry individuals	11q13.3	11	70078246	ANO1	ANO1			ENSG00000131620	NA	NA	rs11233117	C	11233117	intron_variant	0	0.5465	5e-23	22.301	NA	0.0191	[0.015-0.023] unit increase	70078246	C	A	2.17341e-07	0.040529206		NA	NA	NA	NA	NA	NA	NA	NA	NA	NA
Appendicular lean mass	450,243 European ancestry individuals	11q13.3	11	70078246	ANO1	ANO1			ENSG00000131620	NA	NA	rs11233117	C	11233117	intron_variant	0	0.5465	5e-23	22.301	NA	0.0191	[0.015-0.023] unit increase	70078246	C	G	0.452649	0.9985106		G	C	0.789	-0.0014	0.454	-0.0044	0.431	0.00826	NA	NA
Appendicular lean mass	450,243 European ancestry individuals	11q13.3	11	70132941	ANO1	ANO1			ENSG00000131620	NA	NA	rs35784902	A	35784902	intron_variant	0	0.784	1e-14	14	NA	0.0181	[0.014-0.023] unit decrease	70132940	A	AGG	0.214139	0.99659878		AGG	A	0.624	0.003	0.858	-0.00126	0.17	0.01806	NA	NA
Appendicular lean mass	450,243 European ancestry individuals	11q13.3	11	70174662	ANO1	ANO1			ENSG00000131620	NA	NA	rs1876	T	1876	intron_variant	0	0.8892	7e-21	20.1549	NA	0.0286	[0.023-0.034] unit increase	70174662	T	C	0.110869	0.99756236		C	T	0.119	-0.013	0.109	-0.01509	0.765	-0.00538	NA	NA
Appendicular lean mass	450,243 European ancestry individuals	11q13.3	11	70174662	ANO1	ANO1			ENSG00000131620	NA	NA	rs1876	T	1876	intron_variant	0	0.8892	7e-21	20.1549	NA	0.0286	[0.023-0.034] unit increase	70174662	T	G	0	nan		NA	NA	NA	NA	NA	NA	NA	NA	NA	NA
Appendicular lean mass	450,243 European ancestry individuals	11q13.3	11	70259523	intergenic	FADD - PPFIA1	ENSG00000168040	ENSG00000131626		52133	11167	rs546733646	A	546733646	regulatory_region_variant	1	0.9934	1e-09	9	NA	0.0697	[0.047-0.092] unit decrease	70259523	A	G	0.00719877	0.99131285		G	A	0.576	0.0179	0.392	0.03005	0.596	-0.04093	NA	NA
Appendicular lean mass	450,243 European ancestry individuals	11p15.4	11	9368328	intergenic	TMEM41B - IPO7	ENSG00000166471	ENSG00000205339		53692	16324	rs4910048	T	4910048	intergenic_variant	1	0.5049	1e-15	15	NA	0.0151	[0.011-0.019] unit increase	9368328	C	T	0.504456	0.99879619		T	C	0.0777	0.0091	0.417	0.00478	0.0297	0.02306	NA	NA
Appendicular lean mass	450,243 European ancestry individuals	11q21	11	95832124	MTMR2	MTMR2, CEP57			ENSG00000087053, ENSG00000166037	NA	NA	rs7902	A	7902	3_prime_UTR_variant	0	0.5531	5e-15	14.301	NA	0.0149	[0.011-0.019] unit decrease	95832124	A	G	0.443904	0.99991116		G	A	0.0197	0.012	0.0491	0.01157	0.208	0.01345	1	1
Appendicular lean mass	450,243 European ancestry individuals	12q23.2	12	101980010	DRAM1	DRAM1			ENSG00000136048	NA	NA	rs7971536	A	7971536	intron_variant	0	0.4945	1e-24	24	NA	0.0194	[0.016-0.023] unit decrease	101980010	T	A	0.496532	0.99932602		!A	A	0.72	-0.0016	0.665	-0.00251	0.939	-0.00077	NA	NA
Appendicular lean mass	450,243 European ancestry individuals	12q23.2	12	102018926	WASHC3	WASHC3			ENSG00000120860	NA	NA	rs150033364	G	150033364	intron_variant	0	0.8029	1e-25	25	NA	0.0238	[0.019-0.028] unit decrease	102018925	G	GTAGCTGGTATTAC	0.203147	0.99932332		GTAGCTGGTATTAC	G	0.0014	0.0205	0.000177	0.02728	0.82	-0.00307	1	1
Appendicular lean mass	450,243 European ancestry individuals	12q23.2	12	102028581	WASHC3	WASHC3			ENSG00000120860	NA	NA	rs66500550	C	66500550	intron_variant	0	0.9579	2e-17	16.699	NA	0.0393	[0.03-0.048] unit increase	102028581	C	G	0.0420113	0.99970207		G	C	0.199	0.0154	0.683	0.00603	0.101	0.03401	NA	NA
Appendicular lean mass	450,243 European ancestry individuals	12q23.2	12	102555869	intergenic	IGF1 - LINC00485	ENSG00000017427	ENSG00000258169		74125	253411	rs35762	T	35762	intergenic_variant	1	0.1525	4e-17	16.3979	NA	0.0218	[0.017-0.027] unit increase	102555869	T	C	0.847825	0.99941591		!C	C	0.0142	0.0175	0.0325	0.01747	0.23	0.01768	NA	1
Appendicular lean mass	450,243 European ancestry individuals	12q23.2	12	102687414	intergenic	IGF1 - LINC00485	ENSG00000017427	ENSG00000258169		205670	121866	rs2647873	A	2647873	intergenic_variant	1	0.518	3e-23	22.5229	NA	0.0184	[0.015-0.022] unit increase	102687414	A	G	0.479378	0.99759154		!G	G	0.0627	0.0095	0.0991	0.00968	0.388	0.00903	NA	NA
Appendicular lean mass	450,243 European ancestry individuals	12q23.2	12	102739950	intergenic	IGF1 - LINC00485	ENSG00000017427	ENSG00000258169		258206	69330	rs117441946	A	117441946	intergenic_variant	1	0.0488	9e-10	9.04576	NA	0.0267	[0.018-0.035] unit decrease	102739950	T	A	0.0487213	0.99165333		A	T	0.0927	-0.0204	0.104	-0.02225	0.601	-0.01364	NA	NA
Appendicular lean mass	450,243 European ancestry individuals	12q23.2	12	102754150	intergenic	IGF1 - LINC00485	ENSG00000017427	ENSG00000258169		272406	55130	rs142187070	G	142187070	intergenic_variant	1	0.8597	3e-31	30.5229	NA	0.032	[0.027-0.037] unit increase	102754149	GT	G	8.23344e-06	0.98060832		G	GT	0.351	0.9307	0.351	0.93065	NA	NA	NA	NA
Appendicular lean mass	450,243 European ancestry individuals	12q23.3	12	106811975	RIC8B	RIC8B			ENSG00000111785	NA	NA	rs3782709	A	3782709	intron_variant	0	0.6442	8e-11	10.0969	NA	0.0128	[0.0089-0.0167] unit increase	106811975	A	G	0.354685	0.99996318		G	A	0.481	0.0039	0.78	-0.00176	0.0429	0.02402	NA	NA
Appendicular lean mass	244,730 European ancestry women	12q23.3	12	108224853	WSCD2	WSCD2			ENSG00000075035	NA	NA	rs3764002	T	3764002	missense_variant	0	0.262	1e-23	23	NA	0.03	[0.024-0.036] unit increase	108224853	C	T	0.261496	0.99908735		T	C	0.96	-1e-04	0.924	0.00063	0.723	-0.00442	NA	NA
Appendicular lean mass	205,513 European ancestry men	12q23.3	12	108224853	WSCD2	WSCD2			ENSG00000075035	NA	NA	rs3764002	T	3764002	missense_variant	0	0.262	7e-19	18.1549	NA	0.03	[0.024-0.036] unit increase	108224853	C	T	0.261496	0.99908735		T	C	0.96	-1e-04	0.924	0.00063	0.723	-0.00442	NA	NA
Appendicular lean mass	450,243 European ancestry individuals	12q23.3	12	108224853	WSCD2	WSCD2			ENSG00000075035	NA	NA	rs3764002	T	3764002	missense_variant	0	0.2617	4e-39	38.3979	NA	0.028	[0.024-0.032] unit increase	108224853	C	T	0.261496	0.99908735		T	C	0.96	-1e-04	0.924	0.00063	0.723	-0.00442	NA	NA
Appendicular lean mass	450,243 European ancestry individuals	12q24.11	12	109607113	intergenic	MVK - RN7SKP250	ENSG00000110921	ENSG00000200794		8988	55750	rs1541597	T	1541597	regulatory_region_variant	1	0.2012	5e-10	9.30103	NA	0.0147	[0.01-0.0194] unit increase	109607113	G	T	0.199749	0.99920558		T	G	0.909	7e-04	0.85	-0.00138	0.556	0.00788	NA	NA
Appendicular lean mass	450,243 European ancestry individuals	12q24.12	12	111446804	SH2B3	SH2B3, ATXN2			ENSG00000111252, ENSG00000204842	NA	NA	rs3184504	T	3184504	missense_variant	0	0.483	3e-22	21.5229	NA	0.0183	[0.015-0.022] unit decrease	111446804	T	C	0.518201	0.99958061		!C	C	2.92e-05	-0.0215	0.00192	-0.0181	0.00219	-0.03344	NA	1
Appendicular lean mass	205,513 European ancestry men	12q24.12	12	111446804	SH2B3	SH2B3, ATXN2			ENSG00000111252, ENSG00000204842	NA	NA	rs3184504	T	3184504	missense_variant	0	0.483	2e-11	10.699	NA	0.02	[0.014-0.026] unit decrease	111446804	T	C	0.518201	0.99958061		!C	C	2.92e-05	-0.0215	0.00192	-0.0181	0.00219	-0.03344	NA	1
Appendicular lean mass	244,730 European ancestry women	12q24.12	12	111446804	SH2B3	SH2B3, ATXN2			ENSG00000111252, ENSG00000204842	NA	NA	rs3184504	T	3184504	missense_variant	0	0.483	1e-12	12	NA	0.02	[0.014-0.026] unit decrease	111446804	T	C	0.518201	0.99958061		!C	C	2.92e-05	-0.0215	0.00192	-0.0181	0.00219	-0.03344	NA	1
Appendicular lean mass	450,243 European ancestry individuals	12q24.21	12	114670331	TBX3	TBX3			ENSG00000135111	NA	NA	rs1061657	T	1061657	3_prime_UTR_variant	0	0.7421	4e-16	15.3979	NA	0.0176	[0.013-0.022] unit decrease	114670331	T	C	0.25679	0.99917678		C	T	0.581	0.0032	0.377	0.00591	0.639	-0.00577	NA	NA
Appendicular lean mass	450,243 European ancestry individuals	12q24.21	12	115758512	AC009387.1	RN7SL865P - LINC02463	ENSG00000240205	ENSG00000257683		40499	51847	rs34198321	CAA	34198321	intron_variant	1	0.7962	4e-20	19.3979	NA	0.022	[0.017-0.027] unit increase	115758511	C	CAA	0.755866	0.99185151		CAA	C	0.215	0.0074	0.246	0.00792	0.645	0.00577	NA	NA
Appendicular lean mass	450,243 European ancestry individuals	12q24.22	12	117067496	TESC	TESC			ENSG00000088992	NA	NA	rs7305948	T	7305948	intron_variant	0	0.1459	5e-20	19.301	NA	0.0247	[0.019-0.03] unit decrease	117067496	C	T	0.144492	0.99696896		T	C	2.51e-05	-0.0307	2.58e-05	-0.03495	0.276	-0.01653	1	1
Appendicular lean mass	450,243 European ancestry individuals	12p13.2	12	11727647	ETV6	ETV6			ENSG00000139083	NA	NA	rs10845408	T	10845408	intron_variant	0	0.3538	3e-38	37.5229	NA	0.0255	[0.022-0.029] unit increase	11727647	C	T	0.355447	0.99903407		T	C	0.0225	0.0122	0.0839	0.01056	0.113	0.0173	1	1
Appendicular lean mass	450,243 European ancestry individuals	12q24.23	12	120135512	GCN1	GCN1			ENSG00000089154	NA	NA	rs555994863	T	555994863	intron_variant	0	0.0191	4e-09	8.39794	NA	0.0409	[0.027-0.054] unit increase	120135512	C	T	0.0197048	0.99561934		T	C	0.00984	0.0469	0.0181	0.04903	0.29	0.03997	1	1
Appendicular lean mass	450,243 European ancestry individuals	12q24.31	12	121919142	AC069503.2	CFAP251			ENSG00000158023	NA	NA	rs374750909	A	374750909	intron_variant	0	0.188	6e-16	15.2218	NA	0.0202	[0.015-0.025] unit increase	121919141	TTA	T	0	nan		T	TTA	0.205	-0.0369	NA	NA	0.205	-0.0369	NA	NA
Appendicular lean mass	450,243 European ancestry individuals	12q24.31	12	122147832	MLXIP	MLXIP - LRRC43	ENSG00000175727	ENSG00000158113		488	19906	rs7969643	T	7969643	intergenic_variant	1	0.2524	9e-11	10.0458	NA	0.0141	[0.0098-0.0184] unit decrease	122147832	C	T	0.250872	0.99034229		T	C	0.0401	-0.0123	0.265	-0.00754	0.0218	-0.02959	1	1
Appendicular lean mass	450,243 European ancestry individuals	12q24.31	12	122784876	CCDC62	CCDC62			ENSG00000130783	NA	NA	rs192413221	T	192413221	intron_variant	0	0.0146	5e-14	13.301	NA	0.0613	[0.045-0.077] unit increase	122784876	C	T	0.0160662	0.99433501		T	C	0.0398	0.0411	0.129	0.0357	0.146	0.05535	1	1
Appendicular lean mass	450,243 European ancestry individuals	12q24.31	12	123025508	PITPNM2	PITPNM2			ENSG00000090975	NA	NA	rs186407219	A	186407219	intron_variant	0	0.998	1e-09	9	NA	0.1266	[0.086-0.167] unit increase	123025508	A	G	0.00201555	0.9956771		G	A	0.663	0.0271	0.492	0.04589	0.575	-0.0957	NA	NA
Appendicular lean mass	450,243 European ancestry individuals	12q24.31	12	123405729	KMT5A	KMT5A			ENSG00000183955	NA	NA	rs28576953	T	28576953	intron_variant	0	0.2048	6e-38	37.2218	NA	0.0301	[0.026-0.035] unit increase	123405729	C	T	0.204431	0.99939628		T	C	0.586	-0.0033	0.61	-0.00365	0.833	-0.0025	NA	NA
Appendicular lean mass	450,243 European ancestry individuals	12q24.31	12	123921324	DNAH10	CCDC92, DNAH10			ENSG00000119242, ENSG00000197653	NA	NA	rs7301953	A	7301953	intron_variant	0	0.3122	4e-20	19.3979	NA	0.0185	[0.015-0.022] unit decrease	123921324	G	A	0.311136	0.99924623		A	G	8.93e-06	-0.0245	0.000183	-0.02351	0.0157	-0.02787	1	1
Appendicular lean mass	205,513 European ancestry men	12q24.31	12	124341916	NCOR2	NCOR2			ENSG00000196498	NA	NA	rs2229840	T	2229840	missense_variant	0	0.16	4e-20	19.3979	NA	0.03	[0.022-0.038] unit increase	124341916	C	T	0.159754	0.99992219		T	C	0.00122	0.022	0.00622	0.02175	0.0842	0.02268	1	1
Appendicular lean mass	244,730 European ancestry women	12q24.31	12	124341916	NCOR2	NCOR2			ENSG00000196498	NA	NA	rs2229840	T	2229840	missense_variant	0	0.16	8e-24	23.0969	NA	0.03	[0.024-0.036] unit increase	124341916	C	T	0.159754	0.99992219		T	C	0.00122	0.022	0.00622	0.02175	0.0842	0.02268	1	1
Appendicular lean mass	450,243 European ancestry individuals	12q24.31	12	124341916	NCOR2	NCOR2			ENSG00000196498	NA	NA	rs2229840	T	2229840	missense_variant	0	0.1597	3e-40	39.5229	NA	0.0341	[0.029-0.039] unit increase	124341916	C	T	0.159754	0.99992219		T	C	0.00122	0.022	0.00622	0.02175	0.0842	0.02268	1	1
Appendicular lean mass	244,730 European ancestry women	12p13.1	12	12718165	CDKN1B	CDKN1B			ENSG00000111276	NA	NA	rs2066827	T	2066827	missense_variant	0	0.768	3e-07	6.52288	NA	0.01	[0.0041-0.0159] unit increase	12718165	T	A	1.59692e-06	0.61140228		NA	NA	NA	NA	NA	NA	NA	NA	NA	NA
Appendicular lean mass	205,513 European ancestry men	12p13.1	12	12718165	CDKN1B	CDKN1B			ENSG00000111276	NA	NA	rs2066827	T	2066827	missense_variant	0	0.768	3e-11	10.5229	NA	0.02	[0.014-0.026] unit increase	12718165	T	A	1.59692e-06	0.61140228		NA	NA	NA	NA	NA	NA	NA	NA	NA	NA
Appendicular lean mass	450,243 European ancestry individuals	12p13.1	12	12718165	CDKN1B	CDKN1B			ENSG00000111276	NA	NA	rs2066827	T	2066827	missense_variant	0	0.7675	2e-16	15.699	NA	0.0178	[0.013-0.022] unit increase	12718165	T	A	1.59692e-06	0.61140228		NA	NA	NA	NA	NA	NA	NA	NA	NA	NA
Appendicular lean mass	205,513 European ancestry men	12p13.1	12	12718165	CDKN1B	CDKN1B			ENSG00000111276	NA	NA	rs2066827	T	2066827	missense_variant	0	0.768	3e-11	10.5229	NA	0.02	[0.014-0.026] unit increase	12718165	T	G	0.228789	0.95195337		G	T	0.128	-0.0094	0.359	-0.00654	0.147	-0.01768	NA	NA
Appendicular lean mass	244,730 European ancestry women	12p13.1	12	12718165	CDKN1B	CDKN1B			ENSG00000111276	NA	NA	rs2066827	T	2066827	missense_variant	0	0.768	3e-07	6.52288	NA	0.01	[0.0041-0.0159] unit increase	12718165	T	G	0.228789	0.95195337		G	T	0.128	-0.0094	0.359	-0.00654	0.147	-0.01768	NA	NA
Appendicular lean mass	450,243 European ancestry individuals	12p13.1	12	12718165	CDKN1B	CDKN1B			ENSG00000111276	NA	NA	rs2066827	T	2066827	missense_variant	0	0.7675	2e-16	15.699	NA	0.0178	[0.013-0.022] unit increase	12718165	T	G	0.228789	0.95195337		G	T	0.128	-0.0094	0.359	-0.00654	0.147	-0.01768	NA	NA
Appendicular lean mass	450,243 European ancestry individuals	12p13.1	12	12723177	CDKN1B	CDKN1B - APOLD1	ENSG00000111276	ENSG00000178878		808	2740	rs1420023	C	1420023	regulatory_region_variant	1	0.8897	2e-33	32.699	NA	0.0365	[0.031-0.042] unit increase	12723177	C	A	0.00700828	0.96915064		A	C	0.182	-0.0392	0.499	-0.02351	0.154	-0.07783	NA	NA
Appendicular lean mass	450,243 European ancestry individuals	12p13.1	12	12723177	CDKN1B	CDKN1B - APOLD1	ENSG00000111276	ENSG00000178878		808	2740	rs1420023	C	1420023	regulatory_region_variant	1	0.8897	2e-33	32.699	NA	0.0365	[0.031-0.042] unit increase	12723177	C	G	0.109235	0.99688466		G	C	0.000239	-0.0302	5.91e-05	-0.03784	0.722	-0.00596	1	1
Appendicular lean mass	450,243 European ancestry individuals	12q24.33	12	131137217	ADGRD1	ADGRD1			ENSG00000111452	NA	NA	rs885389	A	885389	intron_variant	0	0.3328	6e-37	36.2218	NA	0.0254	[0.021-0.029] unit increase	131137217	A	G	0.666946	0.99767536		!G	G	0.864	-9e-04	0.872	0.00101	0.524	-0.00711	NA	NA
Appendicular lean mass	450,243 European ancestry individuals	12q24.33	12	132099641	AC138466.5	EP400 - EP400P1	ENSG00000183495	ENSG00000185684		19181	4380	rs6598200	A	6598200	intron_variant	1	0.1586	8e-14	13.0969	NA	0.0193	[0.014-0.024] unit increase	132099641	G	A	0.158476	0.99968601		A	G	0.282	0.0074	0.383	0.00691	0.52	0.00903	NA	NA
Appendicular lean mass	450,243 European ancestry individuals	12p12.3	12	14805118	SMCO3	C12orf60, SMCO3			ENSG00000182993, ENSG00000179256	NA	NA	rs34478174	CT	34478174	3_prime_UTR_variant	0	0.3453	2e-10	9.69897	NA	0.0127	[0.0088-0.0166] unit decrease	14805117	C	CT	0.34495	0.99925595		CT	C	0.669	0.0023	0.68	0.00251	0.894	0.00154	NA	NA
Appendicular lean mass	450,243 European ancestry individuals	12p12.3	12	19396002	intergenic	PLEKHA5 - AEBP2	ENSG00000052126	ENSG00000139154		19602	8043	rs73069098	A	73069098	regulatory_region_variant	1	0.9308	4e-10	9.39794	NA	0.0234	[0.016-0.031] unit increase	19396002	A	G	0.0693025	0.99523678		G	A	0.0117	-0.0254	0.000406	-0.04136	0.294	0.02095	1	1
Appendicular lean mass	450,243 European ancestry individuals	12p12.2	12	20420229	PDE3A	PDE3A			ENSG00000172572	NA	NA	rs10770654	A	10770654	intron_variant	0	0.3098	6e-32	31.2218	NA	0.0239	[0.02-0.028] unit decrease	20420229	A	G	0.691813	0.99823213		!G	G	0.738	-0.0019	0.0989	-0.01043	0.0157	0.02902	NA	NA
Appendicular lean mass	450,243 European ancestry individuals	12p12.2	12	20573097	PDE3A	PDE3A			ENSG00000172572	NA	NA	rs61415458	T	61415458	intron_variant	0	0.8668	1e-15	15	NA	0.0223	[0.017-0.028] unit decrease	20573097	T	C	0.132645	0.99715841		C	T	0.369	-0.0067	0.643	-0.00402	0.324	-0.01461	NA	NA
Appendicular lean mass	450,243 European ancestry individuals	12p12.2	12	20573097	PDE3A	PDE3A			ENSG00000172572	NA	NA	rs61415458	T	61415458	intron_variant	0	0.8668	1e-15	15	NA	0.0223	[0.017-0.028] unit decrease	20573097	T	G	1.87681e-05	0.94590091		G	T	0.792	0.1932	0.792	0.19322	NA	NA	NA	NA
Appendicular lean mass	450,243 European ancestry individuals	12p13.33	12	2179779	CACNA1C	CACNA1C			ENSG00000151067	NA	NA	rs2159102	A	2159102	intron_variant	0	0.3956	4e-10	9.39794	NA	0.0121	[0.0084-0.0158] unit decrease	2179779	T	A	0.395216	0.99624003		A	T	0.7	-0.002	0.846	-0.00113	0.648	-0.005	NA	NA
Appendicular lean mass	244,730 European ancestry women	12p12.1	12	21864476	ABCC9	ABCC9			ENSG00000069431	NA	NA	rs61688134	T	61688134	missense_variant	0	0.014	2e-10	9.69897	NA	0.07	[0.048-0.092] unit decrease	21864476	C	T	0.0154924	0.99508771		T	C	0.556	-0.0136	0.583	-0.01295	0.803	-0.02844	NA	NA
Appendicular lean mass	450,243 European ancestry individuals	12p12.1	12	21864476	ABCC9	ABCC9			ENSG00000069431	NA	NA	rs61688134	T	61688134	missense_variant	0	0.0143	8e-15	14.0969	NA	0.0635	[0.047-0.08] unit decrease	21864476	C	T	0.0154924	0.99508771		T	C	0.556	-0.0136	0.583	-0.01295	0.803	-0.02844	NA	NA
Appendicular lean mass	205,513 European ancestry men	12p12.1	12	21864476	ABCC9	ABCC9			ENSG00000069431	NA	NA	rs61688134	T	61688134	missense_variant	0	0.014	4e-06	5.39794	NA	0.06	[0.036-0.084] unit decrease	21864476	C	T	0.0154924	0.99508771		T	C	0.556	-0.0136	0.583	-0.01295	0.803	-0.02844	NA	NA
Appendicular lean mass	450,243 European ancestry individuals	12p12.1	12	24042653	SOX5	SOX5			ENSG00000134532	NA	NA	rs11047225	T	11047225	intron_variant	0	0.4691	4e-10	9.39794	NA	0.0118	[0.0081-0.0155] unit decrease	24042653	C	T	0.469956	0.99943576		T	C	0.971	2e-04	0.803	0.00151	0.709	-0.00404	NA	NA
Appendicular lean mass	450,243 European ancestry individuals	12p11.22	12	28412347	CCDC91	CCDC91			ENSG00000123106	NA	NA	rs11049576	T	11049576	intron_variant	0	0.7072	9e-20	19.0458	NA	0.0188	[0.015-0.023] unit increase	28412347	T	C	0.295448	0.99974859		C	T	0.546	-0.0034	0.55	-0.0039	0.866	-0.00192	NA	NA
Appendicular lean mass	450,243 European ancestry individuals	12p11.22	12	29367084	ERGIC2	ERGIC2			ENSG00000087502	NA	NA	rs12831751	A	12831751	intron_variant	0	0.7143	2e-16	15.699	NA	0.0172	[0.013-0.021] unit decrease	29367084	A	C	0.284058	0.99920436		C	A	0.436	-0.0044	0.254	-0.00742	0.681	0.00461	NA	NA
Appendicular lean mass	450,243 European ancestry individuals	12p13.33	12	3119908	TSPAN9	TSPAN9			ENSG00000011105	NA	NA	rs35244030	A	35244030	intron_variant	0	0.1648	7e-22	21.1549	NA	0.0242	[0.019-0.029] unit increase	3119908	G	A	0.163437	0.99847392		A	G	0.00471	0.0197	0.0535	0.01521	0.0166	0.03574	1	1
Appendicular lean mass	450,243 European ancestry individuals	12p13.32	12	3283934	TSPAN9	TSPAN9			ENSG00000011105	NA	NA	rs67551338	T	67551338	3_prime_UTR_variant	0	0.0615	2e-55	54.699	NA	0.0617	[0.054-0.069] unit increase	3283934	C	T	0.0611792	0.99561536		T	C	1.12e-09	0.0629	2.54e-05	0.05104	1.73e-06	0.09436	1	1
Appendicular lean mass	450,243 European ancestry individuals	12p13.32	12	3302809	AC005865.2	TSPAN9 - LINC02827	ENSG00000011105	ENSG00000236908		16245	15909	rs372224065	C	372224065	non_coding_transcript_exon_variant	1	0.9375	2e-09	8.69897	NA	0.0292	[0.02-0.039] unit decrease	3302809	C	G	0	nan		NA	NA	NA	NA	NA	NA	NA	NA	NA	NA
Appendicular lean mass	450,243 European ancestry individuals	12q12	12	42476642	PRICKLE1	PRICKLE1			ENSG00000139174	NA	NA	rs6582398	T	6582398	intron_variant	0	0.6002	1e-12	12	NA	0.014	[0.01-0.018] unit increase	42476642	C	T	0.598783	0.98977309		!T	T	0.0125	-0.0131	0.0245	-0.01345	0.275	-0.01191	1	1
Appendicular lean mass	450,243 European ancestry individuals	12p13.32	12	4275678	CCND2	CCND2, CCND2-AS1			ENSG00000118971, ENSG00000255920	NA	NA	rs76895963	T	76895963	non_coding_transcript_exon_variant	0	0.9793	8e-112	111.097	NA	0.1639	[0.15-0.18] unit decrease	4275678	T	G	0.0221931	0.96594882		G	T	0.000299	0.0655	0.000392	0.07141	0.33	0.04055	1	1
Appendicular lean mass	450,243 European ancestry individuals	12q13.11	12	46210774	SLC38A1	SLC38A1			ENSG00000111371	NA	NA	rs12828089	A	12828089	intron_variant	0	0.15	4e-11	10.3979	NA	0.0196	[0.014-0.025] unit decrease	46210774	C	A	0.151234	0.968997		A	C	0.381	0.0064	0.81	0.00201	0.177	0.01979	NA	NA
Appendicular lean mass	450,243 European ancestry individuals	12q13.11	12	46261960	SLC38A1	SLC38A1			ENSG00000111371	NA	NA	rs74082087	A	74082087	intron_variant	0	0.9125	2e-10	9.69897	NA	0.0203	[0.014-0.027] unit decrease	46261960	A	G	0.0877639	0.99820022		G	A	0.0358	0.0197	0.00464	0.02942	0.29	-0.02306	1	1
Appendicular lean mass	450,243 European ancestry individuals	12q13.11	12	46370471	SLC38A2	SLC38A2			ENSG00000134294	NA	NA	rs74385174	A	74385174	intron_variant	0	0.9808	2e-25	24.699	NA	0.0709	[0.058-0.084] unit increase	46370471	A	G	0.0191351	0.99620259		G	A	0.0619	-0.035	0.354	-0.01974	0.0258	-0.08898	NA	NA
Appendicular lean mass	450,243 European ancestry individuals	12q13.11	12	46389870	AC008014.1	SLC38A4-AS1			ENSG00000257261	NA	NA	rs12099669	A	12099669	non_coding_transcript_exon_variant	0	0.6962	1e-58	58	NA	0.0331	[0.029-0.037] unit increase	46389870	G	A	0.696071	0.99947848		!A	A	0.00506	-0.0154	0.0142	-0.01559	0.173	-0.01499	1	1
Appendicular lean mass	450,243 European ancestry individuals	12p13.33	12	468071	B4GALNT3	B4GALNT3			ENSG00000139044	NA	NA	rs7137546	A	7137546	intron_variant	0	0.5751	1e-13	13	NA	0.0142	[0.01-0.018] unit decrease	468071	A	T	0.42314	0.99941032		T	A	0.0258	-0.0115	0.0523	-0.01144	0.273	-0.01172	NA	1
Appendicular lean mass	450,243 European ancestry individuals	12q13.11	12	47090256	PCED1B	PCED1B			ENSG00000179715	NA	NA	rs73101415	A	73101415	intron_variant	0	0.7464	2e-11	10.699	NA	0.0145	[0.01-0.019] unit decrease	47090256	A	G	0.254106	0.99511004		G	A	0.526	0.0037	0.33	0.00654	0.663	-0.00519	NA	NA
Appendicular lean mass	450,243 European ancestry individuals	12q13.11	12	48014230	AC004801.4	COL2A1 - SENP1	ENSG00000139219	ENSG00000079387		9676	25554	rs1990028	A	1990028	intron_variant	1	0.7467	1e-12	12	NA	0.0154	[0.011-0.02] unit increase	48014230	A	G	0.253867	0.99928326		G	A	0.000154	-0.0223	0.000166	-0.02527	0.32	-0.0123	1	1
Appendicular lean mass	450,243 European ancestry individuals	12q13.12	12	48844406	DDX23	DDX23			ENSG00000174243	NA	NA	rs61941109	A	61941109	intron_variant	0	0.2846	9e-12	11.0458	NA	0.0143	[0.01-0.018] unit decrease	48844406	G	A	0.284238	0.99914649		A	G	0.758	-0.0017	0.813	-0.00151	0.832	-0.0025	NA	NA
Appendicular lean mass	450,243 European ancestry individuals	12q13.13	12	53680902	ATP5MC2	ATP5MC2 - CALCOCO1	ENSG00000135390	ENSG00000012822		3494	27615	rs12309572	T	12309572	intergenic_variant	1	0.1667	5e-13	12.301	NA	0.0183	[0.013-0.023] unit decrease	53680902	C	T	0.165856	0.99824603		T	C	0.0301	-0.0147	0.068	-0.01433	0.24	-0.01595	1	1
Appendicular lean mass	450,243 European ancestry individuals	12q13.13	12	54034748	HOXC5	HOXC5, HOXC4			ENSG00000172789, ENSG00000198353	NA	NA	rs2071450	T	2071450	3_prime_UTR_variant	0	0.3675	9e-19	18.0458	NA	0.0174	[0.013-0.021] unit decrease	54034748	C	T	0.367662	0.99846568		T	C	0.00453	-0.015	0.0185	-0.01433	0.109	-0.0173	1	1
Appendicular lean mass	450,243 European ancestry individuals	12q13.3	12	56236283	SLC39A5	SLC39A5			ENSG00000139540	NA	NA	rs17118403	T	17118403	intron_variant	0	0.0667	4e-19	18.3979	NA	0.0337	[0.026-0.041] unit increase	56236283	C	T	0.0672176	0.99973164		T	C	0.024	0.0223	0.0314	0.02514	0.411	0.01518	1	1
Appendicular lean mass	205,513 European ancestry men	12q13.3	12	56752285	PRIM1	HSD17B6, PRIM1			ENSG00000025423, ENSG00000198056	NA	NA	rs2277339	T	2277339	missense_variant	0	0.896	7e-15	14.1549	NA	0.03	[0.02-0.04] unit increase	56752285	T	G	0.103482	0.99611895		G	T	0.0233	-0.0195	0.00671	-0.02627	0.765	0.00557	1	1
Appendicular lean mass	244,730 European ancestry women	12q13.3	12	56752285	PRIM1	HSD17B6, PRIM1			ENSG00000025423, ENSG00000198056	NA	NA	rs2277339	T	2277339	missense_variant	0	0.896	5e-18	17.301	NA	0.04	[0.032-0.048] unit increase	56752285	T	G	0.103482	0.99611895		G	T	0.0233	-0.0195	0.00671	-0.02627	0.765	0.00557	1	1
Appendicular lean mass	450,243 European ancestry individuals	12q13.3	12	56752285	PRIM1	HSD17B6, PRIM1			ENSG00000025423, ENSG00000198056	NA	NA	rs2277339	T	2277339	missense_variant	0	0.8961	2e-30	29.699	NA	0.0354	[0.029-0.041] unit increase	56752285	T	G	0.103482	0.99611895		G	T	0.0233	-0.0195	0.00671	-0.02627	0.765	0.00557	1	1
Appendicular lean mass	450,243 European ancestry individuals	12q13.3	12	57133500	LRP1	LRP1			ENSG00000123384	NA	NA	rs11172113	T	11172113	intron_variant	0	0.5877	5e-17	16.301	NA	0.0159	[0.012-0.02] unit increase	57133500	T	C	0.4136	0.99767963		C	T	0.827	-0.0011	0.365	-0.00541	0.246	0.0123	NA	NA
Appendicular lean mass	450,243 European ancestry individuals	12q14.3	12	65324519	MSRB3	MSRB3			ENSG00000174099	NA	NA	rs17178006	T	17178006	intron_variant	0	0.885	2e-11	10.699	NA	0.0197	[0.014-0.026] unit increase	65324519	T	G	0.11656	0.99769601		G	T	0.191	-0.0107	0.0839	-0.01571	0.563	0.01095	NA	NA
Appendicular lean mass	450,243 European ancestry individuals	12q14.3	12	65846094	HMGA2	HMGA2			ENSG00000149948	NA	NA	rs10878339	A	10878339	intron_variant	0	0.9349	2e-23	22.699	NA	0.0372	[0.03-0.044] unit increase	65846094	A	G	0.0634427	0.99908823		G	A	0.237	-0.0126	0.115	-0.01898	0.663	0.0098	NA	NA
Appendicular lean mass	450,243 European ancestry individuals	12q14.3	12	65979822	intergenic	HMGA2 - MIR6074	ENSG00000149948	ENSG00000276878		13531	43798	rs4338565	T	4338565	intergenic_variant	1	0.5176	5e-151	150.301	NA	0.0497	[0.046-0.053] unit decrease	65979822	C	T	0.514942	0.99859142		T	C	9e-07	-0.0253	1.9e-07	-0.03055	0.472	-0.00769	1	1
Appendicular lean mass	450,243 European ancestry individuals	12q15	12	69433878	intergenic	RPS26P45 - LINC02373	ENSG00000241765	ENSG00000257507		10883	15592	rs10748128	T	10748128	intergenic_variant	1	0.3446	7e-38	37.1549	NA	0.0255	[0.022-0.029] unit increase	69433878	G	T	0.344456	0.98745004		T	G	0.74	0.0018	0.291	0.00654	0.24	-0.01268	NA	NA
Appendicular lean mass	450,243 European ancestry individuals	12q15	12	70396332	KCNMB4	KCNMB4			ENSG00000135643	NA	NA	rs79237130	A	79237130	intron_variant	0	0.1606	1e-10	10	NA	0.0166	[0.012-0.022] unit decrease	70396332	T	A	0.158836	0.99903834		A	T	0.338	-0.0069	0.238	-0.00943	0.815	0.00384	NA	NA
Appendicular lean mass	450,243 European ancestry individuals	12q21.2	12	77046043	E2F7	E2F7			ENSG00000165891	NA	NA	rs61754233	C	61754233	missense_variant	0	0.02	2e-10	9.69897	NA	0.0418	[0.029-0.055] unit increase	77046043	G	C	0.0200827	0.99635698		C	G	1	-9e-04	0.888	0.00302	0.91	-0.00384	NA	NA
Appendicular lean mass	244,730 European ancestry women	12q21.2	12	77046043	E2F7	E2F7			ENSG00000165891	NA	NA	rs61754233	C	61754233	missense_variant	0	0.02	2e-06	5.69897	NA	0.04	[0.022-0.058] unit increase	77046043	G	C	0.0200827	0.99635698		C	G	1	-9e-04	0.888	0.00302	0.91	-0.00384	NA	NA
Appendicular lean mass	450,243 European ancestry individuals	12q21.2	12	77053683	E2F7	E2F7			ENSG00000165891	NA	NA	rs7976940	A	7976940	intron_variant	0	0.9323	9e-14	13.0458	NA	0.0282	[0.021-0.036] unit increase	77053683	A	G	0.0662948	0.99335702		G	A	0.113	-0.0159	0.211	-0.01458	0.317	-0.01941	NA	NA
Appendicular lean mass	450,243 European ancestry individuals	12q21.33	12	90066479	AC009522.1	LINC02399 - LINC02392	ENSG00000257725	ENSG00000258183		116753	214415	rs7980592	A	7980592	intron_variant	1	0.2929	1e-13	13	NA	0.0153	[0.011-0.019] unit decrease	90066479	G	A	0.295992	0.99952431		A	G	0.149	-0.0082	0.121	-0.00993	0.874	-0.00192	NA	NA
Appendicular lean mass	450,243 European ancestry individuals	12q21.33	12	90764618	AC084365.2	LINC02822			ENSG00000286021	NA	NA	rs34175820	G	34175820	intron_variant	0	0.7145	6e-17	16.2218	NA	0.0176	[0.013-0.022] unit increase	90764617	GT	G	0.00141214	0.98004657		G	GT	0.874	0.0088	0.708	0.02917	0.879	-0.01191	NA	NA
Appendicular lean mass	450,243 European ancestry individuals	12q22	12	93599490	intergenic	SOCS2 - CRADD	ENSG00000120833	ENSG00000169372		16003	77885	rs9634212	A	9634212	intergenic_variant	1	0.221	9e-95	94.0458	NA	0.0471	[0.043-0.052] unit increase	93599490	C	A	0.222002	0.99808356		A	C	0.362	-0.0055	0.472	-0.00503	0.563	-0.00711	NA	NA
Appendicular lean mass	450,243 European ancestry individuals	12q22	12	93742233	CRADD	CRADD			ENSG00000169372	NA	NA	rs7953280	C	7953280	intron_variant	0	0.5071	3e-64	63.5229	NA	0.0312	[0.028-0.035] unit decrease	93742233	G	C	0.507111	0.99793511		C	G	0.815	0.0012	0.304	-0.00603	0.0203	0.02441	NA	NA
Appendicular lean mass	450,243 European ancestry individuals	12q23.1	12	97402849	intergenic	LINC02409 - RMST	ENSG00000257920	ENSG00000255794		126640	28035	rs4399366	T	4399366	intergenic_variant	1	0.2829	7e-13	12.1549	NA	0.015	[0.011-0.019] unit decrease	97402849	C	T	0.282527	0.9967187		T	C	0.00231	-0.0171	0.0185	-0.01534	0.0446	-0.02229	1	1
Appendicular lean mass	450,243 European ancestry individuals	13q32.3	13	100019615	intergenic	LINC00554 - NDUFA12P1	ENSG00000260738	ENSG00000225999		21706	8154	rs7323466	T	7323466	intergenic_variant	1	0.3488	6e-14	13.2218	NA	0.015	[0.011-0.019] unit decrease	100019615	T	C	0.651288	0.99722784		!C	C	0.11	-0.0086	0.182	-0.00817	0.373	-0.0098	NA	NA
Appendicular lean mass	450,243 European ancestry individuals	13q34	13	114273772	CDC16	CDC16 - MIR4502	ENSG00000130177	ENSG00000265450		1049	56	rs34154389	CAA	34154389	intergenic_variant	1	0.2389	3e-14	13.5229	NA	0.0172	[0.013-0.022] unit decrease	114273771	CAA	C	1.99646e-05	0.59755116		NA	NA	NA	NA	NA	NA	NA	NA	NA	NA
Appendicular lean mass	450,243 European ancestry individuals	13q12.11	13	20897916	XPO4	XPO4			ENSG00000132953	NA	NA	rs7321635	A	7321635	intron_variant	0	0.3535	3e-11	10.5229	NA	0.0132	[0.0093-0.0171] unit increase	20897916	A	C	0.648284	0.99887195		!C	C	1	0	0.979	-0.00013	0.981	0.00019	NA	NA
Appendicular lean mass	450,243 European ancestry individuals	13q12.11	13	20897916	XPO4	XPO4			ENSG00000132953	NA	NA	rs7321635	A	7321635	intron_variant	0	0.3535	3e-11	10.5229	NA	0.0132	[0.0093-0.0171] unit increase	20897916	A	G	1.40922e-05	0.63396572		NA	NA	NA	NA	NA	NA	NA	NA	NA	NA
Appendicular lean mass	450,243 European ancestry individuals	13q12.13	13	26475479	intergenic	CDK8 - WASF3	ENSG00000132964	ENSG00000132970		54497	82204	rs61944841	A	61944841	intergenic_variant	1	0.4138	4e-37	36.3979	NA	0.0253	[0.021-0.029] unit increase	26475479	G	A	0.418455	0.99095458		A	G	1.4e-07	0.0274	3.53e-06	0.02753	0.0126	0.0269	1	1
Appendicular lean mass	450,243 European ancestry individuals	13q12.3	13	29594961	SLC7A1	SLC7A1			ENSG00000139514	NA	NA	rs4769763	C	4769763	intron_variant	0	0.6076	3e-16	15.5229	NA	0.0161	[0.012-0.02] unit decrease	29594961	G	C	0.615715	0.99708507		!C	C	0.00423	0.015	0.00567	0.01659	0.36	0.0098	1	1
Appendicular lean mass	450,243 European ancestry individuals	13q14.11	13	41108925	intergenic	MIR3168 - RN7SL597P	ENSG00000264226	ENSG00000244264		7825	12951	rs17532490	A	17532490	intergenic_variant	1	0.0854	7e-10	9.1549	NA	0.0211	[0.014-0.028] unit decrease	41108925	G	A	0.0861221	0.99790765		A	G	0.285	-0.0098	0.174	-0.01421	0.807	0.00461	NA	NA
Appendicular lean mass	450,243 European ancestry individuals	13q14.11	13	42163132	DGKH	DGKH			ENSG00000102780	NA	NA	rs9594689	T	9594689	intron_variant	0	0.6261	1e-12	12	NA	0.0141	[0.01-0.018] unit increase	42163132	T	A	3.53757e-05	0.95065299		A	T	0.989	-0.0057	0.989	-0.00566	NA	NA	NA	NA
Appendicular lean mass	450,243 European ancestry individuals	13q14.11	13	42163132	DGKH	DGKH			ENSG00000102780	NA	NA	rs9594689	T	9594689	intron_variant	0	0.6261	1e-12	12	NA	0.0141	[0.01-0.018] unit increase	42163132	T	G	0.38078	0.9990443		G	T	0.0231	-0.0119	0.00423	-0.01722	0.643	0.005	1	1
Appendicular lean mass	450,243 European ancestry individuals	13q14.2	13	49393688	CAB39L	CAB39L			ENSG00000102547	NA	NA	rs9596092	A	9596092	intron_variant	0	0.9139	8e-12	11.0969	NA	0.0242	[0.017-0.031] unit increase	49393688	A	T	0.0881721	0.99276187		T	A	0.000534	-0.0309	0.000118	-0.0396	0.805	-0.00442	1	1
Appendicular lean mass	450,243 European ancestry individuals	13q14.2	13	49894594	RNY4P30	CTAGE10P - RNY4P9	ENSG00000181358	ENSG00000200064		1596	14040	rs9591310	T	9591310	intergenic_variant	1	0.1994	1e-29	29	NA	0.0249	[0.021-0.029] unit decrease	49894594	C	T	0.19978	0.99858537		T	C	0.116	-0.0079	0.02	-0.0171	0.907	0.00154	NA	NA
Appendicular lean mass	450,243 European ancestry individuals	13q14.2	13	49956659	DLEU2	SPRYD7 - DLEU2	ENSG00000123178	ENSG00000231607		20169	11	rs56273425	A	56273425	intergenic_variant	1	0.0255	4e-10	9.39794	NA	0.0367	[0.025-0.048] unit decrease	49956659	C	A	0.0270379	0.9977364		A	C	0.79	-0.0043	0.679	-0.00754	0.831	0.0073	NA	NA
Appendicular lean mass	450,243 European ancestry individuals	13q14.3	13	50537219	DLEU1	DLEU7, DLEU1			ENSG00000186047, ENSG00000176124	NA	NA	rs3116602	T	3116602	intron_variant	0	0.7847	1e-154	154	NA	0.0612	[0.057-0.066] unit increase	50537219	T	G	0.215926	0.99997784		G	T	4.48e-07	-0.0314	5.2e-06	-0.03231	0.0287	-0.02825	1	1
Appendicular lean mass	450,243 European ancestry individuals	13q14.3	13	50555599	DLEU1	DLEU7, DLEU1			ENSG00000186047, ENSG00000176124	NA	NA	rs4531637	A	4531637	intron_variant	0	0.853	1e-12	12	NA	0.0208	[0.015-0.026] unit decrease	50555599	A	C	0.290233	0.99785023		C	A	0.0191	0.0132	0.0257	0.01433	0.419	0.00942	1	1
Appendicular lean mass	450,243 European ancestry individuals	13q14.3	13	50555599	DLEU1	DLEU7, DLEU1			ENSG00000186047, ENSG00000176124	NA	NA	rs4531637	A	4531637	intron_variant	0	0.853	1e-12	12	NA	0.0208	[0.015-0.026] unit decrease	50555599	A	G	4.8376e-06	0.79537443		NA	NA	NA	NA	NA	NA	NA	NA	NA	NA
Appendicular lean mass	450,243 European ancestry individuals	13q14.3	13	50579339	DLEU1	DLEU1, DLEU7			ENSG00000176124, ENSG00000186047	NA	NA	rs17074618	T	17074618	intron_variant	0	0.1535	2e-24	23.699	NA	0.0269	[0.022-0.032] unit increase	50579339	C	T	0.154714	0.99883877		T	C	0.000945	0.0232	0.00275	0.02401	0.156	0.02056	1	1
Appendicular lean mass	450,243 European ancestry individuals	13q22.1	13	73615837	LINC00393	LINC00393			ENSG00000224853	NA	NA	rs7328187	T	7328187	intron_variant	0	0.5024	1e-09	9	NA	0.0116	[0.0079-0.0153] unit decrease	73615837	T	G	0.500791	0.99833719		G	T	1.58e-05	0.0221	0.00266	0.0176	0.00048	0.03709	1	1
Appendicular lean mass	450,243 European ancestry individuals	13q22.2	13	75523155	COMMD6	TBC1D4 - COMMD6	ENSG00000136111	ENSG00000188243		40986	2059	rs7319334	A	7319334	intergenic_variant	1	0.5194	4e-09	8.39794	NA	0.0112	[0.0075-0.0149] unit decrease	75523155	G	A	0.519448	0.99901875		!A	A	0.673	0.0021	0.728	-0.00201	0.126	0.01633	NA	NA
Appendicular lean mass	450,243 European ancestry individuals	13q22.3	13	77900333	EDNRB	EDNRB			ENSG00000136160	NA	NA	rs3818416	A	3818416	intron_variant	0	0.2355	2e-35	34.699	NA	0.0279	[0.024-0.032] unit decrease	77900333	A	C	0.76559	0.99943896		!C	C	0.045	-0.0122	0.23	-0.0083	0.0437	-0.02633	NA	1
Appendicular lean mass	450,243 European ancestry individuals	13q31.3	13	91372074	intergenic	MIR17HG			ENSG00000215417	NA	NA	rs9515919	A	9515919	intron_variant	0	0.3693	6e-16	15.2218	NA	0.0159	[0.012-0.02] unit increase	91372074	A	T	0.63175	0.99994886		!T	T	0.255	-0.0059	0.226	-0.00729	0.853	-0.00192	NA	NA
Appendicular lean mass	450,243 European ancestry individuals	13q32.3	13	98920458	DOCK9	DOCK9			ENSG00000088387	NA	NA	rs9517483	A	9517483	intron_variant	0	0.301	2e-18	17.699	NA	0.0181	[0.014-0.022] unit increase	98920458	A	G	0.699186	0.99983833		!G	G	0.0105	0.0141	0.0214	0.01471	0.257	0.01249	NA	1
Appendicular lean mass	450,243 European ancestry individuals	14q32.2	14	100732685	DLK1	DLK1			ENSG00000185559	NA	NA	rs3783350	A	3783350	intron_variant	0	0.7967	5e-11	10.301	NA	0.0156	[0.011-0.02] unit decrease	100732685	G	A	0.797162	0.99741773		!A	A	0.929	-6e-04	0.562	-0.00415	0.397	0.01076	NA	NA
Appendicular lean mass	450,243 European ancestry individuals	14q32.31	14	102432521	TECPR2	TECPR2			ENSG00000196663	NA	NA	rs1190543	A	1190543	intron_variant	0	0.2278	8e-14	13.0969	NA	0.0169	[0.012-0.021] unit decrease	102432521	A	G	0.771876	0.99926815		!G	G	0.378	-0.0054	0.215	-0.00867	0.687	0.005	NA	NA
Appendicular lean mass	450,243 European ancestry individuals	14q11.2	14	21069908	ARHGEF40	NDRG2			ENSG00000165795	NA	NA	rs8019890	A	8019890	intron_variant	0	0.5313	2e-38	37.699	NA	0.025	[0.021-0.029] unit increase	21069908	C	A	0.526443	0.9858637		!A	A	0.565	-0.002	0.343	-0.00553	0.9	0.00135	NA	NA
Appendicular lean mass	450,243 European ancestry individuals	14q11.2	14	21453066	CHD8	CHD8			ENSG00000100888	NA	NA	rs28663442	T	28663442	intron_variant	0	0.1761	1e-19	19	NA	0.0227	[0.018-0.028] unit increase	21453066	C	T	0.178463	0.99386146		T	C	0.0928	0.0113	0.107	0.01232	0.583	0.00788	NA	NA
Appendicular lean mass	450,243 European ancestry individuals	14q11.2	14	22836440	MMP14	MRPL52 - MMP14	ENSG00000172590	ENSG00000157227		1403	120	rs1004030	T	1004030	regulatory_region_variant	1	0.5751	2e-10	9.69897	NA	0.0127	[0.0088-0.0166] unit increase	22836440	T	C	0.425164	0.99863482		C	T	0.89	7e-04	0.438	0.00453	0.257	-0.01211	NA	NA
Appendicular lean mass	450,243 European ancestry individuals	14q11.2	14	23324096	PABPN1	PABPN1, BCL2L2-PABPN1			ENSG00000100836, ENSG00000258643	NA	NA	rs45528934	T	45528934	intron_variant	0	0.1623	2e-24	23.699	NA	0.0262	[0.021-0.031] unit increase	23324096	C	T	0.162547	0.99936151		T	C	0.367	0.0063	0.204	0.01006	0.629	-0.0073	NA	NA
Appendicular lean mass	450,243 European ancestry individuals	14q12	14	24325234	ADCY4	ADCY4			ENSG00000129467	NA	NA	rs17184689	T	17184689	intron_variant	0	0.7452	8e-10	9.09691	NA	0.0135	[0.0092-0.0178] unit decrease	24325234	T	G	0.255627	0.99513435		G	T	0.482	0.0041	0.834	0.00138	0.282	0.01288	NA	NA
Appendicular lean mass	450,243 European ancestry individuals	14q12	14	24366294	NFATC4	NFATC4			ENSG00000100968	NA	NA	rs36226649	T	36226649	intron_variant	0	0.9333	3e-37	36.5229	NA	0.0485	[0.041-0.056] unit decrease	24366294	T	C	0.0674351	0.9993631		C	T	0.0408	0.0204	0.0834	0.02024	0.276	0.02095	1	1
Appendicular lean mass	450,243 European ancestry individuals	14q12	14	24430158	KHNYN	CBLN3, KHNYN			ENSG00000139899, ENSG00000100441	NA	NA	rs4344657	C	4344657	intron_variant	0	0.7292	8e-14	13.0969	NA	0.0168	[0.012-0.021] unit decrease	24430158	G	C	0.729292	0.99974006		!C	C	0.89	8e-04	0.654	-0.00289	0.259	0.01364	NA	NA
Appendicular lean mass	450,243 European ancestry individuals	14q13.2	14	35402011	NFKBIA	NFKBIA			ENSG00000100906	NA	NA	rs8904	A	8904	3_prime_UTR_variant	0	0.363	2e-15	14.699	NA	0.0157	[0.012-0.02] unit decrease	35402011	G	A	0.360788	0.99559177		A	G	0.514	-0.0035	0.181	-0.00817	0.288	0.01172	NA	NA
Appendicular lean mass	450,243 European ancestry individuals	14q22.2	14	54312805	intergenic	ATP5F1CP1 - CDKN3	ENSG00000224004	ENSG00000100526		320810	84044	rs10637890	T	10637890	regulatory_region_variant	1	0.379	4e-10	9.39794	NA	0.0123	[0.0084-0.0162] unit increase	54312804	T	TTC	0.622847	0.99909047		!TTC	TTC	0.708	0.0018	0.658	0.00264	0.93	0.00096	NA	NA
Appendicular lean mass	450,243 European ancestry individuals	14q23.1	14	60091961	PCNX4	PCNX4			ENSG00000126773	NA	NA	rs113053299	A	113053299	5_prime_UTR_variant	0	0.0467	4e-11	10.3979	NA	0.0301	[0.021-0.039] unit increase	60091961	C	A	0.0461839	0.99783028		A	C	0.00814	0.0326	0.0278	0.0308	0.135	0.03863	1	1
Appendicular lean mass	450,243 European ancestry individuals	14q23.1	14	60606157	AL049874.1	C14orf39 - SALRNA1	ENSG00000179008	ENSG00000258952		90614	33059	rs10483727	T	10483727	intergenic_variant	1	0.3891	7e-80	79.1549	NA	0.0368	[0.033-0.041] unit increase	60606157	T	C	0.613096	0.99947049		!C	C	0.000568	0.018	0.000505	0.02087	0.399	0.00903	NA	1
Appendicular lean mass	450,243 European ancestry individuals	14q23.3	14	65071413	MAX	MAX			ENSG00000125952	NA	NA	rs7147987	A	7147987	intron_variant	0	0.5387	1e-23	23	NA	0.0191	[0.015-0.023] unit increase	65071413	A	G	0.461512	0.99878165		G	A	0.143	-0.0075	0.0439	-0.01182	0.538	0.00653	NA	NA
Appendicular lean mass	450,243 European ancestry individuals	14q24.2	14	69881425	SMOC1	SMOC1			ENSG00000198732	NA	NA	rs35230100	CATAT	35230100	intron_variant	0	0.4328	4e-40	39.3979	NA	0.0262	[0.022-0.03] unit decrease	69881424	C	CATAT	0.434562	0.99455265		CATAT	C	0.129	-0.0078	0.467	-0.00427	0.0653	-0.01999	NA	NA
Appendicular lean mass	450,243 European ancestry individuals	14q24.2	14	69973139	SMOC1	SMOC1			ENSG00000198732	NA	NA	rs227447	C	227447	intron_variant	0	0.6664	1e-24	24	NA	0.0192	[0.015-0.023] unit decrease	69973139	C	G	0.335212	0.99924414		G	C	0.989	1e-04	0.496	0.00427	0.243	-0.01288	NA	NA
Appendicular lean mass	450,243 European ancestry individuals	14q24.2	14	72641063	DPF3	DPF3			ENSG00000205683	NA	NA	rs2526919	A	2526919	intron_variant	0	0.4704	6e-12	11.2218	NA	0.0131	[0.0094-0.0168] unit decrease	72641063	A	G	0.52803	0.99922147		!G	G	0.00177	-0.016	0.0148	-0.01421	0.0402	-0.02172	NA	1
Appendicular lean mass	450,243 European ancestry individuals	14q24.3	14	74894203	DLST	DLST			ENSG00000119689	NA	NA	rs2070598	A	2070598	intron_variant	0	0.4559	6e-27	26.2218	NA	0.0204	[0.017-0.024] unit increase	74894203	G	A	0.456013	0.9998491		A	G	0.439	0.0029	0.231	0.00704	0.918	-0.00115	NA	NA
Appendicular lean mass	450,243 European ancestry individuals	14q24.3	14	75439870	JDP2	JDP2			ENSG00000140044	NA	NA	rs1125773	A	1125773	intron_variant	0	0.48	6e-16	15.2218	NA	0.0153	[0.012-0.019] unit increase	75439870	A	C	0.521366	0.99986377		!C	C	0.156	0.0072	0.502	0.0039	0.0818	0.01864	NA	NA
Appendicular lean mass	450,243 European ancestry individuals	14q24.3	14	75439870	JDP2	JDP2			ENSG00000140044	NA	NA	rs1125773	A	1125773	intron_variant	0	0.48	6e-16	15.2218	NA	0.0153	[0.012-0.019] unit increase	75439870	A	T	0	nan		NA	NA	NA	NA	NA	NA	NA	NA	NA	NA
Appendicular lean mass	450,243 European ancestry individuals	14q32.12	14	91984040	TRIP11	TRIP11			ENSG00000100815	NA	NA	rs2295164	T	2295164	intron_variant	0	0.4652	5e-14	13.301	NA	0.0143	[0.011-0.018] unit decrease	91984040	C	T	0.465068	0.99984885		!T	T	0.645	0.0024	0.333	0.00566	0.43	-0.00826	NA	NA
Appendicular lean mass	450,243 European ancestry individuals	14q32.12	14	92651884	RIN3	RIN3			ENSG00000100599	NA	NA	rs117068593	T	117068593	missense_variant	0	0.1895	9e-62	61.0458	NA	0.0403	[0.036-0.045] unit increase	92651884	C	T	0.189411	0.99806901		T	C	2.53e-08	0.0369	2.78e-05	0.03118	5.24e-05	0.059	1	1
Appendicular lean mass	244,730 European ancestry women	14q32.12	14	92651884	RIN3	RIN3			ENSG00000100599	NA	NA	rs117068593	T	117068593	missense_variant	0	0.19	2e-33	32.699	NA	0.04	[0.034-0.046] unit increase	92651884	C	T	0.189411	0.99806901		T	C	2.53e-08	0.0369	2.78e-05	0.03118	5.24e-05	0.059	1	1
Appendicular lean mass	205,513 European ancestry men	14q32.12	14	92651884	RIN3	RIN3			ENSG00000100599	NA	NA	rs117068593	T	117068593	missense_variant	0	0.19	6e-34	33.2218	NA	0.04	[0.032-0.048] unit increase	92651884	C	T	0.189411	0.99806901		T	C	2.53e-08	0.0369	2.78e-05	0.03118	5.24e-05	0.059	1	1
Appendicular lean mass	450,243 European ancestry individuals	14q32.12	14	92939887	CHGA	ITPK1			ENSG00000100605	NA	NA	rs7156335	T	7156335	3_prime_UTR_variant	0	0.9088	4e-18	17.3979	NA	0.0293	[0.023-0.036] unit decrease	92939887	T	C	0.0912059	0.99792552		C	T	0.302	0.0095	0.587	0.00553	0.207	0.0271	NA	NA
Appendicular lean mass	205,513 European ancestry men	14q32.13	14	94378610	SERPINA1	SERPINA1			ENSG00000197249	NA	NA	rs28929474	T	28929474	missense_variant	0	0.02	3e-07	6.52288	NA	0.05	[0.03-0.07] unit increase	94378610	C	T	0.0201937	0.99805563		T	C	0.381	-0.0175	0.315	-0.02125	0.823	0.01364	NA	NA
Appendicular lean mass	244,730 European ancestry women	14q32.13	14	94378610	SERPINA1	SERPINA1			ENSG00000197249	NA	NA	rs28929474	T	28929474	missense_variant	0	0.02	8e-09	8.09691	NA	0.05	[0.032-0.068] unit increase	94378610	C	T	0.0201937	0.99805563		T	C	0.381	-0.0175	0.315	-0.02125	0.823	0.01364	NA	NA
Appendicular lean mass	450,243 European ancestry individuals	14q32.13	14	94378610	SERPINA1	SERPINA1			ENSG00000197249	NA	NA	rs28929474	T	28929474	missense_variant	0	0.0198	1e-14	14	NA	0.0527	[0.039-0.066] unit increase	94378610	C	T	0.0201937	0.99805563		T	C	0.381	-0.0175	0.315	-0.02125	0.823	0.01364	NA	NA
Appendicular lean mass	450,243 European ancestry individuals	14q32.2	14	99770532	EML1	EML1			ENSG00000066629	NA	NA	rs61985998	T	61985998	intron_variant	0	0.4975	2e-12	11.699	NA	0.0134	[0.0097-0.0171] unit increase	99770532	C	T	0.496482	0.99807333		T	C	0.0891	0.0087	0.186	0.00779	0.264	0.01172	NA	NA
Appendicular lean mass	450,243 European ancestry individuals	15q26.3	15	101173228	CHSY1	LRRK1 - CHSY1	ENSG00000154237	ENSG00000131873		94971	2499	rs7181956	A	7181956	intergenic_variant	1	0.1995	1e-12	12	NA	0.0169	[0.012-0.022] unit decrease	101173228	G	A	0.196436	0.99764868		A	G	0.429	0.005	0.689	0.00289	0.351	0.01268	NA	NA
Appendicular lean mass	450,243 European ancestry individuals	15q14	15	38069818	LINC01852	LINC01852			ENSG00000236914	NA	NA	rs34633205	T	34633205	non_coding_transcript_exon_variant	0	0.0685	4e-12	11.3979	NA	0.0264	[0.019-0.034] unit increase	38069818	C	T	0.0689204	0.998293		T	C	0.205	0.0134	0.0677	0.02099	0.28	-0.02959	NA	NA
Appendicular lean mass	450,243 European ancestry individuals	15q14	15	38218255	AC087473.1	LINC02895			ENSG00000259380	NA	NA	rs2174008	C	2174008	intron_variant	0	0.4975	6e-24	23.2218	NA	0.0192	[0.015-0.023] unit decrease	38218255	G	C	0.50201	0.99794093		!C	C	0.0134	0.0126	0.00676	0.01584	0.808	0.0025	1	1
Appendicular lean mass	450,243 European ancestry individuals	15q15.1	15	41076004	INO80	INO80			ENSG00000128908	NA	NA	rs144817447	T	144817447	intron_variant	0	0.9922	2e-11	10.699	NA	0.0717	[0.051-0.092] unit increase	41076004	T	C	0.00846912	0.99945779		C	T	0.413	-0.0243	0.289	-0.03407	0.676	0.03229	NA	NA
Appendicular lean mass	450,243 European ancestry individuals	15q15.1	15	41145955	intergenic	INO80 - CIBAR1P1	ENSG00000128908	ENSG00000157021		29675	17207	rs548932774	A	548932774	intergenic_variant	1	0.3472	2e-22	21.699	NA	0.0198	[0.016-0.024] unit decrease	41145955	G	A	0.307508	0.92238571		A	G	0.415	-0.0048	0.146	-0.01006	0.439	0.00846	NA	NA
Appendicular lean mass	450,243 European ancestry individuals	15q15.1	15	41803948	MAPKBP1	MAPKBP1			ENSG00000137802	NA	NA	rs11855017	A	11855017	intron_variant	0	0.1817	9e-14	13.0458	NA	0.0184	[0.014-0.023] unit increase	41803948	C	A	0.18239	0.99937068		A	C	0.149	0.0095	0.174	0.01018	0.604	0.0073	NA	NA
Appendicular lean mass	450,243 European ancestry individuals	15q15.2	15	42945216	UBR1	UBR1			ENSG00000159459	NA	NA	rs62020698	T	62020698	3_prime_UTR_variant	0	0.0917	9e-14	13.0458	NA	0.0245	[0.018-0.031] unit decrease	42945216	C	T	0.0915536	0.99841222		T	C	0.53	0.0056	0.532	0.00629	0.872	0.00307	NA	NA
Appendicular lean mass	450,243 European ancestry individuals	15q15.3	15	43893133	FRMD5	FRMD5			ENSG00000171877	NA	NA	rs544955246	A	544955246	intron_variant	0	0.9813	3e-13	12.5229	NA	0.0567	[0.042-0.072] unit increase	43893132	A	AC	0.0184416	0.9883373		AC	A	0.931	0.0016	0.773	0.00629	0.759	-0.01095	NA	NA
Appendicular lean mass	450,243 European ancestry individuals	15q21.1	15	45345090	intergenic	SLC28A2-AS1 - RNU6-953P	ENSG00000259520	ENSG00000238941		65839	9689	rs76825670	A	76825670	regulatory_region_variant	1	0.7834	5e-12	11.301	NA	0.0164	[0.012-0.021] unit decrease	45345090	A	G	0.255018	0.99954091		G	A	3.71e-06	0.027	3.89e-06	0.0308	0.224	0.01461	1	1
Appendicular lean mass	450,243 European ancestry individuals	15q21.2	15	51068670	TNFAIP8L3	TNFAIP8L3, MIR4713HG			ENSG00000183578, ENSG00000259240	NA	NA	rs373736365	T	373736365	intron_variant	0	0.2843	5e-18	17.301	NA	0.0189	[0.015-0.023] unit decrease	51068670	T	G	0.373632	0.99948133		G	T	0.159	-0.0156	1	0	0.159	-0.01557	NA	NA
Appendicular lean mass	450,243 European ancestry individuals	15q21.3	15	55545690	PYGO1	PYGO1			ENSG00000171016	NA	NA	rs1550327	T	1550327	3_prime_UTR_variant	0	0.6078	5e-09	8.30103	NA	0.0116	[0.0077-0.0155] unit increase	55545690	C	T	0.609135	0.99978376		!T	T	1	0	0.855	-0.00113	0.76	0.00327	NA	NA
Appendicular lean mass	450,243 European ancestry individuals	15q21.3	15	55879954	NEDD4	NEDD4			ENSG00000069869	NA	NA	rs62043796	T	62043796	intron_variant	0	0.8939	1e-12	12	NA	0.0219	[0.016-0.028] unit decrease	55879954	T	C	0.105634	0.99925933		C	T	0.219	0.0103	0.142	0.01395	0.895	-0.00231	NA	NA
Appendicular lean mass	450,243 European ancestry individuals	15q22.2	15	62089214	intergenic	NPM1P47 - C2CD4B	ENSG00000259466	ENSG00000205502		5909	74321	rs17205463	T	17205463	intergenic_variant	1	0.4477	4e-43	42.3979	NA	0.0263	[0.023-0.03] unit decrease	62089214	C	T	0.449495	0.99476639		T	C	0.184	-0.0068	0.482	-0.00415	0.142	-0.01557	NA	NA
Appendicular lean mass	450,243 European ancestry individuals	15q22.2	15	62440637	TLN2	TLN2			ENSG00000171914	NA	NA	rs72753851	C	72753851	intron_variant	0	0.7773	4e-11	10.3979	NA	0.0149	[0.01-0.019] unit increase	62440637	C	G	0.222779	0.99601653		G	C	0.000679	-0.0208	0.00529	-0.01961	0.0484	-0.02479	1	1
Appendicular lean mass	450,243 European ancestry individuals	15q22.31	15	66716399	SMAD6	SMAD6			ENSG00000137834	NA	NA	rs2278604	A	2278604	intron_variant	0	0.2684	7e-40	39.1549	NA	0.0285	[0.024-0.033] unit increase	66716399	C	A	0.267423	0.99722084		A	C	0.439	0.0045	0.157	0.0093	0.335	-0.01153	NA	NA
Appendicular lean mass	450,243 European ancestry individuals	15q22.31	15	66744103	SMAD6	SMAD6			ENSG00000137834	NA	NA	rs7179372	A	7179372	intron_variant	0	0.2063	6e-11	10.2218	NA	0.0146	[0.01-0.019] unit decrease	66744103	G	A	0.20598	0.99500621		A	G	0.797	-0.0016	0.857	-0.00126	0.824	-0.00327	NA	NA
Appendicular lean mass	450,243 European ancestry individuals	15q22.33	15	67165360	SMAD3	SMAD3			ENSG00000166949	NA	NA	rs35874463	A	35874463	missense_variant	0	0.9423	3e-12	11.5229	NA	0.0273	[0.02-0.035] unit decrease	67165360	A	G	0.0581689	0.99378669		G	A	0.00699	-0.0304	0.0451	-0.02514	0.0415	-0.05208	NA	1
Appendicular lean mass	244,730 European ancestry women	15q22.33	15	67165360	SMAD3	SMAD3			ENSG00000166949	NA	NA	rs35874463	A	35874463	missense_variant	0	0.942	7e-08	7.1549	NA	0.03	[0.02-0.04] unit decrease	67165360	A	G	0.0581689	0.99378669		G	A	0.00699	-0.0304	0.0451	-0.02514	0.0415	-0.05208	NA	1
Appendicular lean mass	205,513 European ancestry men	15q22.33	15	67165360	SMAD3	SMAD3			ENSG00000166949	NA	NA	rs35874463	A	35874463	missense_variant	0	0.942	9e-06	5.04576	NA	0.03	[0.018-0.042] unit decrease	67165360	A	G	0.0581689	0.99378669		G	A	0.00699	-0.0304	0.0451	-0.02514	0.0415	-0.05208	NA	1
Appendicular lean mass	450,243 European ancestry individuals	15q23	15	72292830	CELF6	CELF6			ENSG00000140488	NA	NA	rs569805536	A	569805536	intron_variant	0	0.0038	1e-10	10	NA	0.1066	[0.074-0.139] unit increase	72292830	C	A	4.25029e-05	0.91399908		A	C	0.286	-0.8816	0.286	-0.88163	NA	NA	NA	NA
Appendicular lean mass	450,243 European ancestry individuals	15q24.1	15	73287694	NEO1	NEO1			ENSG00000067141	NA	NA	rs2680338	A	2680338	intron_variant	0	0.5829	1e-16	16	NA	0.016	[0.012-0.02] unit decrease	73287694	A	C	4.65391e-06	0.9987528		C	A	0.112	1.5835	0.112	1.58348	NA	NA	NA	NA
Appendicular lean mass	450,243 European ancestry individuals	15q24.1	15	73287694	NEO1	NEO1			ENSG00000067141	NA	NA	rs2680338	A	2680338	intron_variant	0	0.5829	1e-16	16	NA	0.016	[0.012-0.02] unit decrease	73287694	A	G	0.416834	0.99935394		G	A	0.659	0.0023	0.724	0.00214	0.786	0.00288	NA	NA
Appendicular lean mass	450,243 European ancestry individuals	15q24.1	15	74044292	PML	PML			ENSG00000140464	NA	NA	rs5742915	T	5742915	missense_variant	0	0.5395	9e-39	38.0458	NA	0.0248	[0.021-0.029] unit decrease	74044292	T	C	0.461466	0.99511707		C	T	0.0999	0.0084	0.343	0.00553	0.0915	0.01787	NA	NA
Appendicular lean mass	244,730 European ancestry women	15q24.1	15	74044292	PML	PML			ENSG00000140464	NA	NA	rs5742915	T	5742915	missense_variant	0	0.54	3e-23	22.5229	NA	0.03	[0.024-0.036] unit decrease	74044292	T	C	0.461466	0.99511707		C	T	0.0999	0.0084	0.343	0.00553	0.0915	0.01787	NA	NA
Appendicular lean mass	205,513 European ancestry men	15q24.1	15	74044292	PML	PML			ENSG00000140464	NA	NA	rs5742915	T	5742915	missense_variant	0	0.54	2e-18	17.699	NA	0.02	[0.014-0.026] unit decrease	74044292	T	C	0.461466	0.99511707		C	T	0.0999	0.0084	0.343	0.00553	0.0915	0.01787	NA	NA
Appendicular lean mass	450,243 European ancestry individuals	15q24.2	15	75593089	SNUPN	PTPN9 - SNUPN	ENSG00000169410	ENSG00000169371		13774	4994	rs7170787	A	7170787	intron_variant	1	0.2516	3e-18	17.5229	NA	0.0191	[0.015-0.023] unit increase	75593089	G	A	0.248862	0.99939542		A	G	0.325	0.0059	0.0543	0.01295	0.0999	-0.0221	NA	NA
Appendicular lean mass	450,243 European ancestry individuals	15q24.3	15	76425648	SCAPER	SCAPER			ENSG00000140386	NA	NA	rs11639345	A	11639345	intron_variant	0	0.1015	2e-09	8.69897	NA	0.0188	[0.013-0.025] unit increase	76425648	G	A	0.101269	0.99979325		A	G	0.439	0.0066	0.467	0.00704	0.775	0.005	NA	NA
Appendicular lean mass	450,243 European ancestry individuals	15q25.1	15	80712336	ABHD17C	ABHD17C			ENSG00000136379	NA	NA	rs7177344	T	7177344	intron_variant	0	0.2607	3e-14	13.5229	NA	0.0165	[0.012-0.021] unit decrease	80712336	C	T	0.259675	0.99892585		T	C	0.273	-0.0064	0.436	-0.00515	0.383	-0.01095	NA	NA
Appendicular lean mass	450,243 European ancestry individuals	15q25.1	15	81228547	IL16	IL16			ENSG00000172349	NA	NA	rs2202885	T	2202885	intron_variant	0	0.7057	9e-10	9.04576	NA	0.0128	[0.0087-0.0169] unit increase	81228547	C	T	0.705731	0.99795915		!T	T	0.468	-0.004	0.324	-0.00629	0.776	0.00327	NA	NA
Appendicular lean mass	450,243 European ancestry individuals	15q25.2	15	83992729	ADAMTSL3	ADAMTSL3			ENSG00000156218	NA	NA	rs11638600	A	11638600	intron_variant	0	0.3276	2e-29	28.699	NA	0.0228	[0.019-0.027] unit decrease	83992729	G	A	0.326471	0.9998891		A	G	1.55e-11	-0.0371	6.3e-11	-0.04073	0.0382	-0.02421	1	1
Appendicular lean mass	450,243 European ancestry individuals	15q26.1	15	88714503	intergenic	ISG20 - ACAN	ENSG00000172183	ENSG00000157766		58020	88933	rs72765638	C	72765638	intergenic_variant	1	0.122	5e-17	16.301	NA	0.0242	[0.019-0.03] unit decrease	88714503	G	C	0.122186	0.98891662		C	G	0.385	0.0068	0.899	0.00113	0.113	0.02614	NA	NA
Appendicular lean mass	450,243 European ancestry individuals	15q26.1	15	88813601	ACAN	ACAN			ENSG00000157766	NA	NA	rs11633371	T	11633371	intron_variant	0	0.4764	1e-27	27	NA	0.0208	[0.017-0.025] unit increase	88813601	G	T	0.476902	0.99908541		T	G	0.0174	-0.0122	0.0864	-0.01006	0.0715	-0.01883	NA	1
Appendicular lean mass	450,243 European ancestry individuals	15q26.1	15	88842993	ACAN	ACAN			ENSG00000157766	NA	NA	rs56238630	T	56238630	intron_variant	0	0.9708	7e-39	38.1549	NA	0.0736	[0.063-0.085] unit increase	88842993	T	C	0.0290382	0.99766923		C	T	0.232	-0.0193	0.239	-0.02049	0.776	-0.01211	NA	NA
Appendicular lean mass	205,513 European ancestry men	15q26.1	15	88843421	ACAN	ACAN			ENSG00000157766	NA	NA	rs34949187	A	34949187	missense_variant	0	0.186	1e-26	26	NA	0.04	[0.032-0.048] unit decrease	88843421	G	A	0.187647	0.99556863		A	G	0.451	0.005	0.699	0.00289	0.378	0.01249	NA	NA
Appendicular lean mass	244,730 European ancestry women	15q26.1	15	88843421	ACAN	ACAN			ENSG00000157766	NA	NA	rs34949187	A	34949187	missense_variant	0	0.186	2e-16	15.699	NA	0.03	[0.024-0.036] unit decrease	88843421	G	A	0.187647	0.99556863		A	G	0.451	0.005	0.699	0.00289	0.378	0.01249	NA	NA
Appendicular lean mass	450,243 European ancestry individuals	15q26.1	15	88843421	ACAN	ACAN			ENSG00000157766	NA	NA	rs34949187	A	34949187	missense_variant	0	0.1864	5e-40	39.301	NA	0.0308	[0.026-0.035] unit decrease	88843421	G	A	0.187647	0.99556863		A	G	0.451	0.005	0.699	0.00289	0.378	0.01249	NA	NA
Appendicular lean mass	450,243 European ancestry individuals	15q26.1	15	88881639	HAPLN3	HAPLN3			ENSG00000140511	NA	NA	rs141308595	T	141308595	missense_variant	0	0.0015	2e-12	11.699	NA	0.1742	[0.13-0.22] unit decrease	88881639	G	T	0.00142079	0.99083325		T	G	0.416	0.0495	0.667	0.03482	0.458	0.06861	NA	NA
Appendicular lean mass	205,513 European ancestry men	15q26.1	15	88881639	HAPLN3	HAPLN3			ENSG00000140511	NA	NA	rs141308595	T	141308595	missense_variant	0	0.002	9e-07	6.04576	NA	0.18	[0.11-0.25] unit decrease	88881639	G	T	0.00142079	0.99083325		T	G	0.416	0.0495	0.667	0.03482	0.458	0.06861	NA	NA
Appendicular lean mass	244,730 European ancestry women	15q26.1	15	88881639	HAPLN3	HAPLN3			ENSG00000140511	NA	NA	rs141308595	T	141308595	missense_variant	0	0.002	4e-07	6.39794	NA	0.17	[0.1-0.24] unit decrease	88881639	G	T	0.00142079	0.99083325		T	G	0.416	0.0495	0.667	0.03482	0.458	0.06861	NA	NA
Appendicular lean mass	450,243 European ancestry individuals	15q26.1	15	89361921	MIR9-3HG	MIR9-3HG			ENSG00000255571	NA	NA	rs961288	C	961288	non_coding_transcript_exon_variant	0	0.4132	1e-12	12	NA	0.0138	[0.01-0.018] unit increase	89361921	C	G	0.585058	0.99769728		!G	G	0.0256	0.0116	0.0208	0.0137	0.669	0.00461	NA	1
Appendicular lean mass	450,243 European ancestry individuals	15q26.1	15	90883330	FES	FURIN			ENSG00000140564	NA	NA	rs4702	A	4702	3_prime_UTR_variant	0	0.5566	6e-13	12.2218	NA	0.0137	[0.01-0.0174] unit decrease	90883330	G	A	0.556943	0.99546417		!A	A	0.829	8e-04	0.908	-0.00063	0.42	0.00865	NA	NA
Appendicular lean mass	450,243 European ancestry individuals	15q26.1	15	93506976	AC091078.1	SEPHS1P2 - LINC01579	ENSG00000258787	ENSG00000258754		75759	211566	rs74379684	T	74379684	intron_variant	1	0.0751	4e-14	13.3979	NA	0.0272	[0.02-0.034] unit decrease	93506976	C	T	0.0751382	0.99861733		T	C	0.377	-0.0086	0.375	-0.00981	0.834	-0.00442	NA	NA
Appendicular lean mass	450,243 European ancestry individuals	15q26.2	15	95601869	intergenic	LINC00924 - RNU2-3P	ENSG00000259134	ENSG00000222076		94004	143935	rs8035878	T	8035878	intergenic_variant	1	0.4523	1e-12	12	NA	0.0137	[0.01-0.0174] unit increase	95601869	T	C	0.548712	0.99822378		!C	C	0.704	-0.002	0.806	0.00151	0.241	-0.0123	NA	NA
Appendicular lean mass	450,243 European ancestry individuals	15q26.3	15	98650047	IGF1R	IGF1R			ENSG00000140443	NA	NA	rs7402983	A	7402983	non_coding_transcript_exon_variant	0	0.3983	4e-23	22.3979	NA	0.0192	[0.015-0.023] unit increase	98650047	A	C	0.5979	0.98501501		!C	C	0.43	0.0034	0.992	-0.00013	0.0477	0.02133	NA	NA
Appendicular lean mass	450,243 European ancestry individuals	15q26.3	15	98651667	IGF1R	IGF1R			ENSG00000140443	NA	NA	rs2871865	C	2871865	intron_variant	0	0.8841	3e-62	61.5229	NA	0.0493	[0.043-0.055] unit increase	98651667	C	G	0.115397	0.99797892		G	C	0.0304	-0.0178	0.00887	-0.02401	0.698	0.00711	1	1
Appendicular lean mass	450,243 European ancestry individuals	15q26.3	15	98852605	IGF1R	IGF1R			ENSG00000140443	NA	NA	rs8035410	C	8035410	intron_variant	0	0.8351	2e-23	22.699	NA	0.0252	[0.02-0.03] unit increase	98852605	C	A	1.05687e-05	0.98093592		A	C	0.651	0.3186	0.651	0.31856	NA	NA	NA	NA
Appendicular lean mass	450,243 European ancestry individuals	15q26.3	15	98852605	IGF1R	IGF1R			ENSG00000140443	NA	NA	rs8035410	C	8035410	intron_variant	0	0.8351	2e-23	22.699	NA	0.0252	[0.02-0.03] unit increase	98852605	C	G	0.172346	0.99235871		G	C	0.493	-0.0046	0.27	-0.00855	0.587	0.0073	NA	NA
Appendicular lean mass	450,243 European ancestry individuals	16p13.3	16	1071226	SSTR5-AS1	SSTR5, SSTR5-AS1			ENSG00000162009, ENSG00000261713	NA	NA	rs548411	T	548411	intron_variant	0	0.2455	6e-17	16.2218	NA	0.018	[0.014-0.022] unit decrease	1071226	G	T	0.246121	0.99630804		T	G	0.0818	-0.0104	0.0792	-0.01194	0.677	-0.00519	NA	NA
Appendicular lean mass	450,243 European ancestry individuals	16p13.3	16	1244623	TPSAB1	TPSAB1 - TPSD1	ENSG00000172236	ENSG00000095917		2069	11436	rs2092389	T	2092389	intergenic_variant	1	0.2081	1e-15	15	NA	0.019	[0.014-0.024] unit decrease	1244623	T	C	0.796402	0.99801126		!C	C	9.26e-06	-0.028	2.58e-05	-0.0303	0.122	-0.02037	NA	1
Appendicular lean mass	450,243 European ancestry individuals	16p13.3	16	1319072	UBE2I	UBE2I			ENSG00000103275	NA	NA	rs8046527	C	8046527	non_coding_transcript_exon_variant	0	0.131	6e-10	9.22185	NA	0.0172	[0.012-0.023] unit increase	1319072	C	G	0.868625	0.99926715		!G	G	0.422	0.0061	0.152	0.01232	0.35	-0.01461	NA	NA
Appendicular lean mass	450,243 European ancestry individuals	16p13.12	16	14286911	intergenic	Y_RNA - MIR193BHG	ENSG00000201134	ENSG00000262454		11311	14478	rs246177	T	246177	TF_binding_site_variant	1	0.3681	2e-27	26.699	NA	0.0214	[0.017-0.025] unit increase	14286911	C	T	0.367853	0.99755695		T	C	0.000931	0.0175	0.0152	0.01471	0.0149	0.02614	1	1
Appendicular lean mass	244,730 European ancestry women	16p13.11	16	15038117	NTAN1	PDXDC1, NTAN1			ENSG00000179889, ENSG00000157045	NA	NA	rs1136001	T	1136001	missense_variant	0	0.297	8e-09	8.09691	NA	0.02	[0.014-0.026] unit decrease	15038117	G	T	0.295891	0.99998019		T	G	0.415	0.0046	0.681	0.00264	0.34	0.01134	NA	NA
Appendicular lean mass	450,243 European ancestry individuals	16p13.11	16	15038117	NTAN1	PDXDC1, NTAN1			ENSG00000179889, ENSG00000157045	NA	NA	rs1136001	T	1136001	missense_variant	0	0.2965	3e-16	15.5229	NA	0.0169	[0.013-0.021] unit decrease	15038117	G	T	0.295891	0.99998019		T	G	0.415	0.0046	0.681	0.00264	0.34	0.01134	NA	NA
Appendicular lean mass	205,513 European ancestry men	16p13.11	16	15038117	NTAN1	PDXDC1, NTAN1			ENSG00000179889, ENSG00000157045	NA	NA	rs1136001	T	1136001	missense_variant	0	0.297	9e-10	9.04576	NA	0.02	[0.014-0.026] unit decrease	15038117	G	T	0.295891	0.99998019		T	G	0.415	0.0046	0.681	0.00264	0.34	0.01134	NA	NA
Appendicular lean mass	450,243 European ancestry individuals	16p13.3	16	1529150	TMEM204	TMEM204, IFT140			ENSG00000131634, ENSG00000187535	NA	NA	rs3784828	T	3784828	intron_variant	0	0.1274	2e-12	11.699	NA	0.0192	[0.014-0.024] unit increase	1529150	C	T	0.12653	0.99937423		T	C	0.00286	0.0232	0.0507	0.0171	0.00665	0.04593	1	1
Appendicular lean mass	244,730 European ancestry women	16p13.3	16	1778029	SPSB3	SPSB3, EME2			ENSG00000162032, ENSG00000197774	NA	NA	rs35816944	A	35816944	stop_gained	0	0.007	4e-11	10.3979	NA	0.1	[0.071-0.129] unit decrease	1778029	G	A	0.00673238	0.99150282		A	G	0.321	-0.0309	0.148	-0.05104	0.539	0.04093	NA	NA
Appendicular lean mass	450,243 European ancestry individuals	16p13.3	16	1778029	SPSB3	SPSB3, EME2			ENSG00000162032, ENSG00000197774	NA	NA	rs35816944	A	35816944	stop_gained	0	0.0066	2e-23	22.699	NA	0.1097	[0.088-0.131] unit decrease	1778029	G	A	0.00673238	0.99150282		A	G	0.321	-0.0309	0.148	-0.05104	0.539	0.04093	NA	NA
Appendicular lean mass	205,513 European ancestry men	16p13.3	16	1778029	SPSB3	SPSB3, EME2			ENSG00000162032, ENSG00000197774	NA	NA	rs35816944	A	35816944	stop_gained	0	0.007	5e-14	13.301	NA	0.12	[0.089-0.151] unit decrease	1778029	G	A	0.00673238	0.99150282		A	G	0.321	-0.0309	0.148	-0.05104	0.539	0.04093	NA	NA
Appendicular lean mass	450,243 European ancestry individuals	16p12.3	16	19268226	SYT17	SYT17			ENSG00000103528	NA	NA	rs9939257	T	9939257	3_prime_UTR_variant	0	0.5101	4e-15	14.3979	NA	0.0165	[0.012-0.021] unit increase	19268226	T	C	0.560007	0.98352897		!C	C	0.426	0.0041	0.26	0.00666	0.712	-0.00384	NA	NA
Appendicular lean mass	450,243 European ancestry individuals	16p13.3	16	2110972	PKD1	PKD1			ENSG00000008710	NA	NA	rs116092985	A	116092985	missense_variant	0	0.9042	1e-34	34	NA	0.0401	[0.034-0.047] unit increase	2110972	A	G	0.0976699	0.99820315		G	A	0.815	0.0021	0.632	0.00465	0.627	-0.01038	NA	NA
Appendicular lean mass	205,513 European ancestry men	16p13.3	16	2110972	PKD1	PKD1			ENSG00000008710	NA	NA	rs116092985	A	116092985	missense_variant	0	0.904	9e-17	16.0458	NA	0.04	[0.03-0.05] unit increase	2110972	A	G	0.0976699	0.99820315		G	A	0.815	0.0021	0.632	0.00465	0.627	-0.01038	NA	NA
Appendicular lean mass	244,730 European ancestry women	16p13.3	16	2110972	PKD1	PKD1			ENSG00000008710	NA	NA	rs116092985	A	116092985	missense_variant	0	0.904	3e-20	19.5229	NA	0.04	[0.032-0.048] unit increase	2110972	A	G	0.0976699	0.99820315		G	A	0.815	0.0021	0.632	0.00465	0.627	-0.01038	NA	NA
Appendicular lean mass	450,243 European ancestry individuals	16p13.3	16	2205806	BRICD5	MLST8			ENSG00000167965	NA	NA	rs112805476	A	112805476	5_prime_UTR_variant	0	0.2622	2e-27	26.699	NA	0.0246	[0.02-0.029] unit decrease	2205806	G	A	0.267015	0.98966142		A	G	0.594	-0.0031	0.78	0.00189	0.112	-0.01922	NA	NA
Appendicular lean mass	450,243 European ancestry individuals	16p13.3	16	2224662	E4F1	E4F1			ENSG00000167967	NA	NA	rs74367875	T	74367875	intron_variant	0	0.035	1e-17	17	NA	0.0456	[0.035-0.056] unit increase	2224662	C	T	0.0361898	0.99046012		T	C	0.115	0.0215	0.17	0.02175	0.436	0.02095	NA	NA
Appendicular lean mass	205,513 European ancestry men	16p12.1	16	24939559	ARHGAP17	ARHGAP17			ENSG00000140750	NA	NA	rs78457529	T	78457529	missense_variant	0	0.012	7e-10	9.1549	NA	0.08	[0.055-0.105] unit decrease	24939559	C	T	0.011546	0.98516097		T	C	0.139	-0.0277	0.935	0.00226	0.00165	-0.12126	NA	NA
Appendicular lean mass	450,243 European ancestry individuals	16p12.1	16	24939559	ARHGAP17	ARHGAP17			ENSG00000140750	NA	NA	rs78457529	T	78457529	missense_variant	0	0.0117	1e-24	24	NA	0.0904	[0.073-0.108] unit decrease	24939559	C	T	0.011546	0.98516097		T	C	0.139	-0.0277	0.935	0.00226	0.00165	-0.12126	NA	NA
Appendicular lean mass	244,730 European ancestry women	16p12.1	16	24939559	ARHGAP17	ARHGAP17			ENSG00000140750	NA	NA	rs78457529	T	78457529	missense_variant	0	0.012	5e-17	16.301	NA	0.1	[0.076-0.124] unit decrease	24939559	C	T	0.011546	0.98516097		T	C	0.139	-0.0277	0.935	0.00226	0.00165	-0.12126	NA	NA
Appendicular lean mass	450,243 European ancestry individuals	16p11.2	16	30044429	FAM57B	TLCD3B			ENSG00000149926	NA	NA	rs4788218	T	4788218	intron_variant	0	0.599	6e-46	45.2218	NA	0.0275	[0.024-0.031] unit decrease	30044429	T	C	0.402725	0.99969432		C	T	4.11e-06	0.0239	0.00012	0.02275	0.0104	0.02748	1	1
Appendicular lean mass	450,243 European ancestry individuals	16p13.3	16	322635	AXIN1	AXIN1			ENSG00000103126	NA	NA	rs3848364	T	3848364	intron_variant	0	0.7342	2e-11	10.699	NA	0.0144	[0.01-0.019] unit increase	322635	T	G	0.267114	0.99757409		G	T	0.185	0.0075	0.33	0.00641	0.336	0.01095	NA	NA
Appendicular lean mass	450,243 European ancestry individuals	16p13.3	16	3965315	ADCY9	ADCY9			ENSG00000162104	NA	NA	rs1045475	A	1045475	3_prime_UTR_variant	0	0.1782	2e-19	18.699	NA	0.0223	[0.017-0.027] unit decrease	3965315	A	G	0.822222	0.99921975		!G	G	0.469	-0.0049	0.207	-0.00968	0.404	0.01211	NA	NA
Appendicular lean mass	450,243 European ancestry individuals	16p13.3	16	4939214	PPL	PPL			ENSG00000118898	NA	NA	rs2908660	T	2908660	intron_variant	0	0.5649	2e-09	8.69897	NA	0.0109	[0.0074-0.0144] unit decrease	4939214	C	T	0.565667	0.99322377		!T	T	0.0141	0.0126	0.00654	0.01609	0.853	0.00192	1	1
Appendicular lean mass	450,243 European ancestry individuals	16q12.1	16	50073362	HEATR3	HEATR3			ENSG00000155393	NA	NA	rs62033029	A	62033029	non_coding_transcript_exon_variant	0	0.2064	2e-09	8.69897	NA	0.0141	[0.0096-0.0186] unit decrease	50073362	G	A	0.204951	0.99989635		A	G	0.489	0.0045	0.694	0.00289	0.457	0.01057	NA	NA
Appendicular lean mass	450,243 European ancestry individuals	16q12.2	16	53474890	RBL2	RBL2			ENSG00000103479	NA	NA	rs72801843	A	72801843	intron_variant	0	0.3015	9e-52	51.0458	NA	0.0313	[0.027-0.035] unit increase	53474890	T	A	0.301739	0.99965018		A	T	0.0632	0.0102	0.0245	0.01421	0.837	-0.00231	NA	NA
Appendicular lean mass	450,243 European ancestry individuals	16q12.2	16	53775211	FTO	FTO			ENSG00000140718	NA	NA	rs55872725	T	55872725	intron_variant	0	0.4038	1e-32	32	NA	0.0222	[0.018-0.026] unit increase	53775211	C	T	0.402084	0.99991782		T	C	0.0146	0.0128	0.0289	0.01307	0.273	0.01191	1	1
Appendicular lean mass	450,243 European ancestry individuals		NA	NA	AC007495.1					NA	NA	chr16:56216710	A	NA		1	0.528	4e-09	8.39794	NA	0.0112	[0.0075-0.0149] unit decrease	56216710	T	C	1.62583e-08	0.0054285553		NA	NA	NA	NA	NA	NA	NA	NA	NA	NA
Appendicular lean mass	450,243 European ancestry individuals		NA	NA	AC007495.1					NA	NA	chr16:56216710	A	NA		1	0.528	4e-09	8.39794	NA	0.0112	[0.0075-0.0149] unit decrease	56216710	T	C	1.62583e-08	0.0054285553		NA	NA	NA	NA	NA	NA	NA	NA	NA	NA
Appendicular lean mass	450,243 European ancestry individuals		NA	NA	AC007495.1					NA	NA	chr16:56216710	A	NA		1	0.528	4e-09	8.39794	NA	0.0112	[0.0075-0.0149] unit decrease	56216710	T	C	1.62583e-08	0.0054285553		NA	NA	NA	NA	NA	NA	NA	NA	NA	NA
Appendicular lean mass	450,243 European ancestry individuals	16q13	16	56965346	CETP	CETP			ENSG00000087237	NA	NA	rs7203984	A	7203984	intron_variant	0	0.8067	2e-12	11.699	NA	0.017	[0.012-0.022] unit decrease	56965346	A	C	0.192992	0.99859758		C	A	0.00485	0.0182	0.00211	0.02275	0.782	0.00365	1	1
Appendicular lean mass	450,243 European ancestry individuals	16q22.1	16	67893337	PSKH1	PSKH1			ENSG00000159792	NA	NA	rs35268848	A	35268848	5_prime_UTR_variant	0	0.0119	3e-13	12.5229	NA	0.0737	[0.054-0.093] unit increase	67893337	C	A	0.0146253	0.99663784		A	C	0.0155	0.0532	0.0339	0.05205	0.242	0.05765	1	1
Appendicular lean mass	450,243 European ancestry individuals	16q22.1	16	69833932	WWP2	WWP2			ENSG00000198373	NA	NA	rs4985445	A	4985445	intron_variant	0	0.5435	3e-20	19.5229	NA	0.0175	[0.014-0.021] unit increase	69833932	A	C	0	nan		NA	NA	NA	NA	NA	NA	NA	NA	NA	NA
Appendicular lean mass	450,243 European ancestry individuals	16q22.1	16	69833932	WWP2	WWP2			ENSG00000198373	NA	NA	rs4985445	A	4985445	intron_variant	0	0.5435	3e-20	19.5229	NA	0.0175	[0.014-0.021] unit increase	69833932	A	G	0.458556	0.99981911		G	A	0.482	-0.0027	0.279	-0.00641	0.94	0.00077	NA	NA
Appendicular lean mass	450,243 European ancestry individuals	16q22.2	16	71591306	intergenic	TAT-AS1 - MARVELD3	ENSG00000260886	ENSG00000140832		13119	34855	rs4788811	A	4788811	intergenic_variant	1	0.8589	3e-12	11.5229	NA	0.0193	[0.014-0.025] unit increase	71591306	A	G	0.143773	0.99910331		G	A	0.384	-0.0062	0.653	-0.00377	0.347	-0.01307	NA	NA
Appendicular lean mass	450,243 European ancestry individuals	16p13.3	16	733865	CIAO3	HAGHL, CIAO3			ENSG00000103253, ENSG00000103245	NA	NA	rs12051245	T	12051245	non_coding_transcript_exon_variant	0	0.7682	3e-40	39.5229	NA	0.0299	[0.026-0.034] unit decrease	733865	T	C	0.231666	0.99991067		C	T	0.274	0.0066	0.504	0.00465	0.302	0.01249	NA	NA
Appendicular lean mass	450,243 European ancestry individuals	16q23.1	16	75205289	CTRB2	CTRB2			ENSG00000168928	NA	NA	rs543099777	A	543099777	non_coding_transcript_exon_variant	0	0.1822	2e-10	9.69897	NA	0.0163	[0.011-0.021] unit increase	75205289	G	A	0.198613	0.97176768		A	G	0.441	0.0042	0.315	0.00742	0.916	0.00135	NA	NA
Appendicular lean mass	450,243 European ancestry individuals	16q23.2	16	81501185	CMIP	CMIP			ENSG00000153815	NA	NA	rs2925979	T	2925979	intron_variant	0	0.2999	2e-11	10.699	NA	0.0138	[0.0099-0.0177] unit increase	81501185	T	C	0.699102	0.99762587		!C	C	0.0253	0.0125	0.0862	0.01094	0.127	0.01787	NA	1
Appendicular lean mass	450,243 European ancestry individuals	16q23.2	16	81548835	CMIP	CMIP			ENSG00000153815	NA	NA	rs28377284	C	28377284	intron_variant	0	0.196	7e-21	20.1549	NA	0.0225	[0.018-0.027] unit decrease	81548835	G	C	0.195644	0.99768566		C	G	0.153	-0.0093	0.158	-0.01043	0.699	-0.00538	NA	NA
Appendicular lean mass	450,243 European ancestry individuals	16q24.1	16	84775218	USP10	USP10			ENSG00000103194	NA	NA	rs774298	C	774298	missense_variant	0	0.3689	4e-13	12.3979	NA	0.0142	[0.01-0.018] unit decrease	84775218	C	A	0.0067291	0.97057135		A	C	0.421	0.0265	0.337	0.03394	0.807	-0.0221	NA	NA
Appendicular lean mass	450,243 European ancestry individuals	16q24.1	16	84775218	USP10	USP10			ENSG00000103194	NA	NA	rs774298	C	774298	missense_variant	0	0.3689	4e-13	12.3979	NA	0.0142	[0.01-0.018] unit decrease	84775218	C	G	0.630872	0.98494502		!G	G	0.0278	-0.0117	0.0539	-0.01182	0.289	-0.01153	NA	1
Appendicular lean mass	450,243 European ancestry individuals	16q24.1	16	84775218	USP10	USP10			ENSG00000103194	NA	NA	rs774298	C	774298	missense_variant	0	0.3689	4e-13	12.3979	NA	0.0142	[0.01-0.018] unit decrease	84775218	C	T	1.34634e-06	0.73696507		NA	NA	NA	NA	NA	NA	NA	NA	NA	NA
Appendicular lean mass	450,243 European ancestry individuals	16q24.1	16	84831903	CRISPLD2	CRISPLD2			ENSG00000103196	NA	NA	rs9319453	T	9319453	intron_variant	0	0.6671	2e-09	8.69897	NA	0.0126	[0.0085-0.0167] unit decrease	84831903	G	T	0.667126	0.99705442		!T	T	0.274	0.0059	0.281	0.00666	0.754	0.00346	NA	NA
Appendicular lean mass	450,243 European ancestry individuals	16q24.1	16	86063872	intergenic	LINC02132 - LINC01082	ENSG00000268804	ENSG00000269186		127649	132082	rs56360131	T	56360131	intergenic_variant	1	0.1955	4e-11	10.3979	NA	0.0154	[0.011-0.02] unit decrease	86063872	C	T	0.192601	0.99900087		T	C	0.513	-0.0042	0.531	-0.00465	0.821	-0.00288	NA	NA
Appendicular lean mass	450,243 European ancestry individuals	16q24.1	16	86343325	LINC00917	LINC00917			ENSG00000168367	NA	NA	rs34406692	T	34406692	intron_variant	0	0.0655	6e-14	13.2218	NA	0.0278	[0.021-0.035] unit increase	86343325	C	T	0.0656878	0.99826911		T	C	0.696	0.0039	0.726	-0.00415	0.192	0.02479	NA	NA
Appendicular lean mass	450,243 European ancestry individuals	16q24.1	16	86383628	intergenic	LINC00917 - FENDRR	ENSG00000168367	ENSG00000268388		33940	90901	rs8054549	A	8054549	regulatory_region_variant	1	0.4486	3e-39	38.5229	NA	0.0251	[0.021-0.029] unit decrease	86383628	C	A	0.446505	0.99786568		A	C	0.00559	-0.0143	0.00584	-0.01622	0.457	-0.00788	1	1
Appendicular lean mass	450,243 European ancestry individuals	16q24.2	16	88265189	AC138512.1	LINC02182 - ZNF469	ENSG00000260420	ENSG00000225614		69972	117770	rs112898929	A	112898929	intron_variant	1	0.0797	1e-16	16	NA	0.0296	[0.023-0.037] unit decrease	88265189	T	A	0.0810479	0.99550133		A	T	0.708	-0.0029	0.605	-0.00553	0.969	-0.00077	NA	NA
Appendicular lean mass	450,243 European ancestry individuals	16q24.2	16	88287421	AC138512.1	LINC02182 - ZNF469	ENSG00000260420	ENSG00000225614		92204	95538	rs76520574	T	76520574	intron_variant	1	0.0413	4e-22	21.3979	NA	0.047	[0.037-0.057] unit decrease	88287421	C	T	0.0403729	0.99537115		T	C	0.381	-0.0116	0.781	-0.00415	0.17	-0.03959	NA	NA
Appendicular lean mass	450,243 European ancestry individuals	16q24.2	16	88440764	ZNF469	ZNF469 - ZFPM1	ENSG00000225614	ENSG00000179588		7	12516	rs45580931	T	45580931	intergenic_variant	1	0.0428	4e-11	10.3979	NA	0.0316	[0.022-0.041] unit decrease	88440764	C	T	0.0433224	0.99059253		T	C	0.329	-0.0131	0.344	-0.01383	0.787	-0.00903	NA	NA
Appendicular lean mass	450,243 European ancestry individuals	16q24.3	16	88792238	intergenic	PIEZO1 - CDT1	ENSG00000103335	ENSG00000167513		7018	11551	rs2968478	T	2968478	intergenic_variant	1	0.4174	6e-14	13.2218	NA	0.0141	[0.01-0.018] unit increase	88792238	T	G	0.580473	0.9919482		!G	G	0.348	0.004	0.196	0.00767	0.961	0.00058	NA	NA
Appendicular lean mass	450,243 European ancestry individuals	16q24.3	16	89506808	SPG7	SPG7			ENSG00000197912	NA	NA	rs62070319	T	62070319	intron_variant	0	0.4427	3e-20	19.5229	NA	0.018	[0.014-0.022] unit decrease	89506808	C	T	0.473117	0.99915878		T	C	0.0251	-0.0114	0.0955	-0.00968	0.106	-0.0171	1	1
Appendicular lean mass	450,243 European ancestry individuals	16p13.2	16	8953341	USP7	USP7			ENSG00000187555	NA	NA	rs9924441	T	9924441	intron_variant	0	0.2539	2e-10	9.69897	NA	0.0138	[0.0095-0.0181] unit increase	8953341	C	T	0.251554	0.99935629		T	C	0.254	0.0068	0.106	0.01094	0.565	-0.00711	NA	NA
Appendicular lean mass	450,243 European ancestry individuals	17p13.3	17	1023500	ABR	ABR			ENSG00000159842	NA	NA	rs2663343	A	2663343	intron_variant	0	0.3124	7e-15	14.1549	NA	0.0153	[0.011-0.019] unit decrease	1023500	G	A	0.312816	0.99549456		A	G	0.324	-0.0055	0.373	-0.00566	0.668	-0.0048	NA	NA
Appendicular lean mass	450,243 European ancestry individuals	17p13.3	17	1470224	MYO1C	MYO1C			ENSG00000197879	NA	NA	rs9905106	T	9905106	missense_variant	0	0.2646	8e-14	13.0969	NA	0.016	[0.012-0.02] unit increase	1470224	T	C	0.735363	0.9952217		!C	C	0.000522	0.0202	0.00109	0.02162	0.21	0.01537	NA	1
Appendicular lean mass	244,730 European ancestry women	17p13.3	17	1470224	MYO1C	MYO1C			ENSG00000197879	NA	NA	rs9905106	T	9905106	missense_variant	0	0.265	2e-09	8.69897	NA	0.02	[0.014-0.026] unit increase	1470224	T	C	0.735363	0.9952217		!C	C	0.000522	0.0202	0.00109	0.02162	0.21	0.01537	NA	1
Appendicular lean mass	205,513 European ancestry men	17p13.3	17	1470224	MYO1C	MYO1C			ENSG00000197879	NA	NA	rs9905106	T	9905106	missense_variant	0	0.265	6e-06	5.22185	NA	0.01	[0.0041-0.0159] unit increase	1470224	T	C	0.735363	0.9952217		!C	C	0.000522	0.0202	0.00109	0.02162	0.21	0.01537	NA	1
Appendicular lean mass	450,243 European ancestry individuals	17p13.3	17	1620673	SLC43A2	SLC43A2			ENSG00000167703	NA	NA	rs72820359	A	72820359	intron_variant	0	0.0733	4e-11	10.3979	NA	0.0231	[0.016-0.03] unit decrease	1620673	G	A	0.0743989	0.99535058		A	G	0.67	0.0042	0.747	0.00365	0.764	0.00634	NA	NA
Appendicular lean mass	450,243 European ancestry individuals	17p11.2	17	17462085	TSEN15P1	Y_RNA - MED9	ENSG00000201134	ENSG00000141026		1563	14909	rs1242507	A	1242507	intergenic_variant	1	0.5613	1e-11	11	NA	0.0134	[0.0095-0.0173] unit increase	17462085	G	A	0.562371	0.98973932		!A	A	0.00176	-0.0163	0.0163	-0.01433	0.0348	-0.02248	1	1
Appendicular lean mass	450,243 European ancestry individuals	17p11.2	17	21375977	KCNJ12	MAP2K3 - KCNJ12	ENSG00000034152	ENSG00000184185		60745	380	rs7213608	T	7213608	TF_binding_site_variant	1	0.675	1e-38	38	NA	0.0265	[0.023-0.03] unit increase	21375977	C	T	0.676064	0.99655697		!T	T	0.0578	-0.0103	0.188	-0.00817	0.123	-0.0173	NA	NA
Appendicular lean mass	450,243 European ancestry individuals	17p13.3	17	2334167	TSR1	TSR1			ENSG00000167721	NA	NA	rs413016	T	413016	intron_variant	0	0.2642	4e-16	15.3979	NA	0.0176	[0.013-0.022] unit increase	2334167	T	C	0.735286	0.9974252		!C	C	0.109	0.0093	0.286	0.00704	0.166	0.01653	NA	NA
Appendicular lean mass	450,243 European ancestry individuals	17p13.3	17	2405836	MNT	METTL16			ENSG00000127804	NA	NA	rs57513571	T	57513571	non_coding_transcript_exon_variant	0	0.2004	2e-11	10.699	NA	0.0154	[0.011-0.02] unit decrease	2405836	C	T	0.200331	0.99789146		T	C	0.0036	-0.0187	0.0298	-0.01597	0.0368	-0.02787	1	1
Appendicular lean mass	450,243 European ancestry individuals	17q11.2	17	28717464	RPL23A	RAB34			ENSG00000109113	NA	NA	rs11545700	A	11545700	missense_variant	0	0.1251	8e-18	17.0969	NA	0.0247	[0.019-0.03] unit decrease	28717464	C	A	0.126661	0.99963551		A	C	0.706	-0.003	0.436	-0.00691	0.471	0.01288	NA	NA
Appendicular lean mass	450,243 European ancestry individuals	17q11.2	17	29238977	intergenic	TWF1P1 - CRYBA1	ENSG00000178082	ENSG00000108255		34503	7882	rs74411146	A	74411146	regulatory_region_variant	1	0.9575	4e-10	9.39794	NA	0.0294	[0.02-0.039] unit decrease	29238977	A	C	0	nan		NA	NA	NA	NA	NA	NA	NA	NA	NA	NA
Appendicular lean mass	450,243 European ancestry individuals	17q11.2	17	29238977	intergenic	TWF1P1 - CRYBA1	ENSG00000178082	ENSG00000108255		34503	7882	rs74411146	A	74411146	regulatory_region_variant	1	0.9575	4e-10	9.39794	NA	0.0294	[0.02-0.039] unit decrease	29238977	A	G	0.0432787	0.99661476		G	A	0.209	0.016	0.0496	0.02841	0.317	-0.0269	NA	NA
Appendicular lean mass	450,243 European ancestry individuals	17q11.2	17	29793869	SSH2	SSH2			ENSG00000141298	NA	NA	rs72823964	T	72823964	non_coding_transcript_exon_variant	0	0.1321	1e-24	24	NA	0.0286	[0.023-0.034] unit increase	29793869	C	T	0.132122	0.99881806		T	C	0.0855	0.013	0.166	0.01194	0.293	0.01672	NA	NA
Appendicular lean mass	450,243 European ancestry individuals	17q11.2	17	30312643	TMIGD1	BLMH - TMIGD1	ENSG00000108578	ENSG00000182271		20587	3690	rs57812147	A	57812147	intergenic_variant	1	0.0659	2e-20	19.699	NA	0.0354	[0.028-0.043] unit decrease	30312643	G	A	0.0659561	0.99971787		A	G	0.154	-0.0147	0.358	-0.01081	0.2	-0.02729	NA	NA
Appendicular lean mass	450,243 European ancestry individuals	17q11.2	17	30836573	ATAD5	ATAD5			ENSG00000176208	NA	NA	rs117662433	A	117662433	intron_variant	0	0.036	5e-12	11.301	NA	0.0354	[0.025-0.045] unit decrease	30836573	T	A	0.0374013	0.99816084		A	T	0.00497	-0.038	0.0115	-0.03872	0.219	-0.03555	1	1
Appendicular lean mass	450,243 European ancestry individuals	17q11.2	17	30879403	ATAD5	ATAD5			ENSG00000176208	NA	NA	rs6505216	T	6505216	intron_variant	0	0.233	2e-101	100.699	NA	0.0498	[0.045-0.054] unit decrease	30879403	G	T	0.256802	0.99789307		T	G	4.03e-05	-0.0239	0.000864	-0.02213	0.0137	-0.02998	1	1
Appendicular lean mass	450,243 European ancestry individuals	17q11.2	17	31385360	NF1	NF1 - RAB11FIP4	ENSG00000196712	ENSG00000131242		3244	6315	rs2854332	A	2854332	intergenic_variant	1	0.6993	2e-25	24.699	NA	0.0216	[0.017-0.026] unit decrease	31385360	A	C	1.24825e-05	0.94028873		C	A	0.124	1.5299	0.124	1.52993	NA	NA	NA	NA
Appendicular lean mass	450,243 European ancestry individuals	17q11.2	17	31385360	NF1	NF1 - RAB11FIP4	ENSG00000196712	ENSG00000131242		3244	6315	rs2854332	A	2854332	intergenic_variant	1	0.6993	2e-25	24.699	NA	0.0216	[0.017-0.026] unit decrease	31385360	A	T	0.300949	0.99903381		T	A	0.0199	0.0131	0.232	0.00767	0.00832	0.03036	1	1
Appendicular lean mass	450,243 European ancestry individuals	17q12	17	38773325	PIP4K2B	PIP4K2B			ENSG00000276293	NA	NA	rs2338115	T	2338115	intron_variant	0	0.5555	1e-39	39	NA	0.0251	[0.021-0.029] unit increase	38773325	C	T	0.555237	0.99948005		!T	T	0.105	-0.0083	0.142	-0.00867	0.489	-0.0073	NA	NA
Appendicular lean mass	450,243 European ancestry individuals	17q21.2	17	40421164	TOP2A	TOP2A - RPL23AP75	ENSG00000131747	ENSG00000240125		3268	18303	rs190471737	A	190471737	intergenic_variant	1	0.9332	4e-10	9.39794	NA	0.024	[0.016-0.032] unit decrease	40421164	A	G	0.0702263	0.99870422		G	A	0.387	0.0087	0.0334	0.02439	0.0401	-0.04247	NA	NA
Appendicular lean mass	450,243 European ancestry individuals	17q21.2	17	41821482	FKBP10	FKBP10			ENSG00000141756	NA	NA	rs8073219	A	8073219	intron_variant	0	0.2564	3e-12	11.5229	NA	0.0152	[0.011-0.02] unit increase	41821482	A	G	0.7414	0.99957776		!G	G	0.139	0.0086	0.177	0.00905	0.535	0.0073	NA	NA
Appendicular lean mass	450,243 European ancestry individuals	17q21.31	17	43605615	RF00017	DHX8			ENSG00000067596	NA	NA	rs12603963	T	12603963	intron_variant	0	0.6303	4e-09	8.39794	NA	0.0119	[0.008-0.0158] unit decrease	43605615	T	C	0.371935	0.99043299		C	T	0.867	-9e-04	0.753	-0.00189	0.813	0.00269	NA	NA
Appendicular lean mass	450,243 European ancestry individuals	17q21.31	17	44266333	SLC4A1	SLC4A1			ENSG00000004939	NA	NA	rs45445495	A	45445495	intron_variant	0	0.0495	1e-18	18	NA	0.0397	[0.031-0.049] unit decrease	44266333	C	A	0.0506704	0.98700712		A	C	0.236	-0.0141	0.115	-0.02099	0.624	0.01288	NA	NA
Appendicular lean mass	450,243 European ancestry individuals	17q21.31	17	44611092	intergenic	FZD2 - SMCO4P1	ENSG00000180340	ENSG00000267384		49830	34319	rs11867858	T	11867858	regulatory_region_variant	1	0.2076	2e-11	10.699	NA	0.0152	[0.011-0.02] unit increase	44611092	C	T	0.207496	0.99841075		T	C	0.0563	0.0123	0.0531	0.01395	0.69	0.00577	NA	NA
Appendicular lean mass	450,243 European ancestry individuals	17q21.31	17	44726707	DBF4B	DBF4B			ENSG00000161692	NA	NA	rs181693066	A	181693066	intron_variant	0	0.0124	1e-10	10	NA	0.0741	[0.052-0.097] unit decrease	44726707	T	A	1.47919e-05	0.94781699		NA	NA	NA	NA	NA	NA	NA	NA	NA	NA
Appendicular lean mass	450,243 European ancestry individuals	17q21.31	17	45145950	HEXIM1	ACBD4 - HEXIM1	ENSG00000181513	ENSG00000186834		1769	2525	rs112981250	CAT	112981250	intergenic_variant	1	0.3184	1e-52	52	NA	0.0311	[0.027-0.035] unit decrease	45145949	C	CAT	0.317251	0.9997396		CAT	C	8.26e-05	-0.0217	0.000483	-0.02187	0.0683	-0.02114	1	1
Appendicular lean mass	450,243 European ancestry individuals	17q21.31	17	45939105	MAPT	MAPT			ENSG00000186868	NA	NA	rs572329978	T	572329978	intron_variant	0	0.9747	1e-12	12	NA	0.058	[0.042-0.074] unit increase	45939105	T	C	3.48197e-09	0.00099999657		NA	NA	NA	NA	NA	NA	NA	NA	NA	NA
Appendicular lean mass	450,243 European ancestry individuals	17q21.32	17	46904715	intergenic	WNT9B - LINC01974	ENSG00000158955	ENSG00000262031		17985	5027	rs197907	C	197907	intergenic_variant	1	0.2778	2e-10	9.69897	NA	0.0135	[0.0094-0.0176] unit decrease	46904715	G	C	0.27985	0.99774044		C	G	0.606	-0.003	0.345	-0.00616	0.5	0.00826	NA	NA
Appendicular lean mass	450,243 European ancestry individuals	17q21.32	17	48110821	SNX11	SNX11			ENSG00000002919	NA	NA	rs118127175	T	118127175	intron_variant	0	0.0372	2e-17	16.699	NA	0.0426	[0.033-0.052] unit decrease	48110821	G	T	0.0381756	0.99926569		T	G	0.0278	-0.0282	0.128	-0.02326	0.0892	-0.04016	1	1
Appendicular lean mass	450,243 European ancestry individuals	17q21.32	17	48704273	LINC02086	LINC02086			ENSG00000244649	NA	NA	rs28613067	A	28613067	non_coding_transcript_exon_variant	0	0.2768	1e-26	26	NA	0.0227	[0.019-0.027] unit increase	48704273	G	A	0.273478	0.99669258		A	G	0.623	0.0028	0.278	0.00704	0.308	-0.01268	NA	NA
Appendicular lean mass	450,243 European ancestry individuals	17q21.32	17	48836501	CALCOCO2	CALCOCO2			ENSG00000136436	NA	NA	rs78270829	T	78270829	intron_variant	0	0.982	2e-10	9.69897	NA	0.0465	[0.032-0.061] unit decrease	48836501	T	G	0.0185601	0.99870987		G	T	0.166	0.0265	0.0713	0.03885	0.635	-0.01979	NA	NA
Appendicular lean mass	450,243 European ancestry individuals	17q21.32	17	48963885	GIP	GIP			ENSG00000159224	NA	NA	rs4794005	A	4794005	intron_variant	0	0.4444	9e-15	14.0458	NA	0.0151	[0.011-0.019] unit increase	48963885	G	A	0.44471	0.99976851		A	G	0.245	0.0049	0.112	0.0093	0.952	0.00058	NA	NA
Appendicular lean mass	450,243 European ancestry individuals	17q22	17	55843160	AC090618.1	PCTP - ANKFN1	ENSG00000141179	ENSG00000153930		330	39141	rs9303375	A	9303375	intron_variant	1	0.0597	1e-13	13	NA	0.0304	[0.022-0.038] unit increase	55843160	G	A	0.0592817	0.9978285		A	G	0.0153	0.0268	0.021	0.02841	0.421	0.01999	1	1
Appendicular lean mass	450,243 European ancestry individuals	17q22	17	56139146	ANKFN1	ANKFN1			ENSG00000153930	NA	NA	rs72829750	T	72829750	intron_variant	0	0.4001	2e-19	18.699	NA	0.0174	[0.014-0.021] unit decrease	56139146	C	T	0.401866	0.99965356		T	C	0.00824	-0.0138	0.0131	-0.01483	0.329	-0.01038	1	1
Appendicular lean mass	450,243 European ancestry individuals	17q22	17	56528108	intergenic	ANKFN1 - RPL39P33	ENSG00000153930	ENSG00000243058		11092	44932	rs73991579	A	73991579	intergenic_variant	1	0.9133	6e-14	13.2218	NA	0.0241	[0.018-0.03] unit decrease	56528108	A	G	0.0870256	0.98026731		G	A	0.0179	0.0221	0.03	0.02288	0.336	0.01941	1	1
Appendicular lean mass	450,243 European ancestry individuals	17q22	17	56771863	intergenic	NOG - C17orf67	ENSG00000183691	ENSG00000214226		176252	20050	rs8073455	T	8073455	intergenic_variant	1	0.4941	2e-11	10.699	NA	0.0127	[0.009-0.0164] unit decrease	56771863	C	T	0.493528	0.99693068		!T	T	0.379	0.0045	0.814	0.00138	0.166	0.01461	NA	NA
Appendicular lean mass	450,243 European ancestry individuals	17q23.1	17	59784140	VMP1	VMP1			ENSG00000062716	NA	NA	rs56251713	A	56251713	3_prime_UTR_variant	0	0.6235	1e-11	11	NA	0.0133	[0.0094-0.0172] unit decrease	59784140	T	A	0.556365	0.99259666		A	T	0.0434	-0.0085	0.00464	-0.01672	0.954	-0.00058	1	1
Appendicular lean mass	450,243 European ancestry individuals	17q23.2	17	61420889	intergenic	LINC02875 - TBX4	ENSG00000187013	ENSG00000121075		7609	31515	rs9905385	A	9905385	TF_binding_site_variant	1	0.3293	2e-63	62.699	NA	0.0339	[0.03-0.038] unit increase	61420889	A	G	0.669925	0.9946591		!G	G	0.00242	0.0164	0.00261	0.01873	0.4	0.00922	NA	1
Appendicular lean mass	450,243 European ancestry individuals	17q23.2	17	61531365	intergenic	TBX4 - NACA2	ENSG00000121075	ENSG00000253506		46255	59056	rs2079796	C	2079796	intergenic_variant	1	0.3702	7e-21	20.1549	NA	0.0185	[0.015-0.022] unit increase	61531365	G	C	0.368066	0.99877982		C	G	0.0914	0.0088	0.0639	0.01119	0.869	0.00173	NA	NA
Appendicular lean mass	450,243 European ancestry individuals	17q23.2	17	62559465	TLK2	TLK2			ENSG00000146872	NA	NA	rs11657101	A	11657101	intron_variant	0	0.3612	3e-16	15.5229	NA	0.0161	[0.012-0.02] unit increase	62559465	G	A	0.361134	0.99859256		A	G	0.789	-0.0014	0.226	0.00742	0.00647	-0.02998	NA	NA
Appendicular lean mass	450,243 European ancestry individuals	17q23.3	17	63104531	TANC2	TANC2			ENSG00000170921	NA	NA	rs78119823	A	78119823	intron_variant	0	0.0459	5e-11	10.301	NA	0.0298	[0.021-0.039] unit decrease	63104531	T	A	0.0468039	0.99944534		A	T	0.275	-0.013	0.785	-0.00377	0.0903	-0.03997	NA	NA
Appendicular lean mass	450,243 European ancestry individuals	17q23.3	17	63687351	MAP3K3	MAP3K3, STRADA			ENSG00000198909, ENSG00000266173	NA	NA	rs377122391	CA	377122391	intron_variant	0	0.2039	8e-24	23.0969	NA	0.0256	[0.021-0.03] unit increase	63687350	CA	C	0.000199623	0.94838572		C	CA	0.396	0.1712	0.396	0.17122	NA	NA	NA	NA
Appendicular lean mass	450,243 European ancestry individuals	17q23.3	17	63918895	GH1	GH1 - CD79B	ENSG00000259384	ENSG00000007312		56	9843	rs2005172	A	2005172	intron_variant	1	0.3603	2e-128	127.699	NA	0.048	[0.044-0.052] unit decrease	63918895	A	C	0.63028	0.99449489		!C	C	0.000853	-0.0176	0.00168	-0.01898	0.226	-0.01326	NA	1
Appendicular lean mass	450,243 European ancestry individuals	17q23.3	17	63918895	GH1	GH1 - CD79B	ENSG00000259384	ENSG00000007312		56	9843	rs2005172	A	2005172	intron_variant	1	0.3603	2e-128	127.699	NA	0.048	[0.044-0.052] unit decrease	63918895	A	T	8.51501e-06	0.92159581		NA	NA	NA	NA	NA	NA	NA	NA	NA	NA
Appendicular lean mass	450,243 European ancestry individuals	17q23.3	17	63918913	GH1	GH1 - CD79B	ENSG00000259384	ENSG00000007312		74	9825	rs11568828	T	11568828	intron_variant	1	0.8826	8e-81	80.0969	NA	0.0597	[0.054-0.066] unit increase	63918913	T	C	0.118014	0.98484809		C	T	0.00148	-0.0256	0.00183	-0.02854	0.357	-0.01557	1	1
Appendicular lean mass	450,243 European ancestry individuals	17q23.3	17	63931743	AC127029.3	CD79B			ENSG00000007312	NA	NA	rs34357194	T	34357194	intron_variant	0	0.9397	6e-16	15.2218	NA	0.0415	[0.032-0.051] unit decrease	63931743	T	C	0.000629989	0.88454864		C	T	0.576	0.0551	0.75	-0.04375	0.257	0.16123	NA	NA
Appendicular lean mass	450,243 European ancestry individuals	17q23.3	17	64330199	PECAM1	PECAM1			ENSG00000261371	NA	NA	rs7225219	A	7225219	intron_variant	0	0.6584	2e-12	11.699	NA	0.0139	[0.01-0.0178] unit decrease	64330199	T	A	0.656088	0.9991229		!A	A	0.977	0	0.938	-5e-04	0.806	0.00269	NA	NA
Appendicular lean mass	450,243 European ancestry individuals	17q24.1	17	64730589	intergenic	SMURF2 - MICOS10P2	ENSG00000108854	ENSG00000270714		68282	16675	rs2676298	T	2676298	regulatory_region_variant	1	0.853	2e-23	22.699	NA	0.0269	[0.022-0.032] unit decrease	64730589	C	T	0.852922	0.99851393		!T	T	0.511	-0.0046	0.693	-0.00327	0.544	-0.00807	NA	NA
Appendicular lean mass	450,243 European ancestry individuals	17q24.1	17	65560284	AC004805.1	AXIN2			ENSG00000168646	NA	NA	rs12452505	C	12452505	5_prime_UTR_variant	0	0.8578	7e-23	22.1549	NA	0.0268	[0.022-0.032] unit increase	65560284	C	G	0.141303	0.99860606		G	C	0.322	-0.0061	0.176	-0.01131	0.961	0.00096	NA	NA
Appendicular lean mass	244,730 European ancestry women	17q24.2	17	69085137	ABCA6	ABCA6			ENSG00000154262	NA	NA	rs77542162	A	77542162	missense_variant	0	0.977	2e-15	14.699	NA	0.07	[0.052-0.088] unit decrease	69085137	A	G	0.023036	0.99539396		G	A	0.475	-0.01	0.986	0.00038	0.0749	-0.0613	NA	NA
Appendicular lean mass	205,513 European ancestry men	17q24.2	17	69085137	ABCA6	ABCA6			ENSG00000154262	NA	NA	rs77542162	A	77542162	missense_variant	0	0.977	3e-06	5.52288	NA	0.05	[0.03-0.07] unit decrease	69085137	A	G	0.023036	0.99539396		G	A	0.475	-0.01	0.986	0.00038	0.0749	-0.0613	NA	NA
Appendicular lean mass	450,243 European ancestry individuals	17q24.2	17	69085137	ABCA6	ABCA6			ENSG00000154262	NA	NA	rs77542162	A	77542162	missense_variant	0	0.9774	1e-19	19	NA	0.0576	[0.045-0.07] unit decrease	69085137	A	G	0.023036	0.99539396		G	A	0.475	-0.01	0.986	0.00038	0.0749	-0.0613	NA	NA
Appendicular lean mass	450,243 European ancestry individuals	17q24.3	17	69438084	MAP2K6	MAP2K6			ENSG00000108984	NA	NA	rs12451722	T	12451722	intron_variant	0	0.585	1e-21	21	NA	0.0179	[0.014-0.022] unit decrease	69438084	T	C	0.414366	0.99525134		C	T	0.729	0.0015	0.981	0.00013	0.42	0.00865	NA	NA
Appendicular lean mass	450,243 European ancestry individuals	17q24.3	17	70176185	KCNJ2	KCNJ2			ENSG00000123700	NA	NA	rs173135	T	173135	synonymous_variant	0	0.115	3e-30	29.5229	NA	0.0341	[0.028-0.04] unit decrease	70176185	C	T	0.114509	0.99814634		T	C	0.0916	-0.0137	0.85	-0.00176	0.00201	-0.05073	NA	NA
Appendicular lean mass	450,243 European ancestry individuals	17q24.3	17	70222860	intergenic	KCNJ2 - CALM2P1	ENSG00000123700	ENSG00000267170		42816	18464	rs236532	T	236532	intergenic_variant	1	0.6077	2e-16	15.699	NA	0.016	[0.012-0.02] unit decrease	70222860	C	T	0.610055	0.99562688		!T	T	0.901	-7e-04	0.837	0.00126	0.541	-0.00653	NA	NA
Appendicular lean mass	450,243 European ancestry individuals	17q24.3	17	71236007	intergenic	CASC17 - RNU7-155P	ENSG00000260785	ENSG00000238759		33804	62149	rs9909320	T	9909320	intergenic_variant	1	0.4422	2e-16	15.699	NA	0.0156	[0.012-0.019] unit decrease	71236007	T	A	4.16984e-05	0.83238286		A	T	0.241	-0.6786	0.241	-0.6786	NA	NA	NA	NA
Appendicular lean mass	450,243 European ancestry individuals	17q24.3	17	71236007	intergenic	CASC17 - RNU7-155P	ENSG00000260785	ENSG00000238759		33804	62149	rs9909320	T	9909320	intergenic_variant	1	0.4422	2e-16	15.699	NA	0.0156	[0.012-0.019] unit decrease	71236007	T	G	0.561887	0.99929513		!G	G	0.497	-0.0034	0.374	-0.00515	0.84	0.00211	NA	NA
Appendicular lean mass	450,243 European ancestry individuals	17p13.1	17	7328473	NEURL4	NEURL4			ENSG00000215041	NA	NA	rs9905997	A	9905997	intron_variant	0	0.5457	7e-10	9.1549	NA	0.0117	[0.008-0.0154] unit decrease	7328473	A	G	0.453859	0.99794266		G	A	0.279	0.0055	0.344	0.00553	0.597	0.00557	NA	NA
Appendicular lean mass	244,730 European ancestry women	17p13.1	17	7463300	ZBTB4	ZBTB4			ENSG00000174282	NA	NA	rs34914463	T	34914463	missense_variant	0	0.869	2e-20	19.699	NA	0.03	[0.022-0.038] unit decrease	7463300	T	C	0.132342	0.99605219		C	T	0.172	0.0089	0.0748	0.01534	0.935	0.00135	NA	NA
Appendicular lean mass	450,243 European ancestry individuals	17p13.1	17	7463300	ZBTB4	ZBTB4			ENSG00000174282	NA	NA	rs34914463	T	34914463	missense_variant	0	0.8687	1e-39	39	NA	0.0361	[0.031-0.041] unit decrease	7463300	T	C	0.132342	0.99605219		C	T	0.172	0.0089	0.0748	0.01534	0.935	0.00135	NA	NA
Appendicular lean mass	205,513 European ancestry men	17p13.1	17	7463300	ZBTB4	ZBTB4			ENSG00000174282	NA	NA	rs34914463	T	34914463	missense_variant	0	0.869	5e-21	20.301	NA	0.04	[0.032-0.048] unit decrease	7463300	T	C	0.132342	0.99605219		C	T	0.172	0.0089	0.0748	0.01534	0.935	0.00135	NA	NA
Appendicular lean mass	450,243 European ancestry individuals	17p13.1	17	7484411	ZBTB4	POLR2A			ENSG00000181222	NA	NA	rs144575559	A	144575559	5_prime_UTR_variant	0	0.0053	8e-11	10.0969	NA	0.0836	[0.058-0.109] unit decrease	7484411	C	A	0.00554299	0.99902801		A	C	0.744	-0.0093	0.918	-0.00402	0.647	-0.02345	NA	NA
Appendicular lean mass	450,243 European ancestry individuals	17q25.1	17	75655174	RECQL5	RECQL5			ENSG00000108469	NA	NA	rs820212	T	820212	intron_variant	0	0.3748	3e-10	9.52288	NA	0.0123	[0.0084-0.0162] unit decrease	75655174	C	T	0.375037	0.9994971		T	C	0.186	-0.007	0.188	-0.00792	0.724	-0.00384	NA	NA
Appendicular lean mass	450,243 European ancestry individuals	17p13.1	17	7668434	TP53	TP53			ENSG00000141510	NA	NA	rs78378222	T	78378222	3_prime_UTR_variant	0	0.9877	5e-56	55.301	NA	0.138	[0.12-0.16] unit decrease	7668434	T	G	0.0121959	0.99241111		G	T	0.000115	0.0861	0.0261	0.06047	0.000372	0.13952	1	1
Appendicular lean mass	205,513 European ancestry men	17q25.3	17	81120022	AATK	AATK			ENSG00000181409	NA	NA	rs36000545	A	36000545	missense_variant	0	0.604	5e-13	12.301	NA	0.02	[0.014-0.026] unit increase	81120022	A	G	0.39651	0.99563117		G	A	0.112	-0.0083	0.049	-0.01182	0.789	0.00288	NA	NA
Appendicular lean mass	450,243 European ancestry individuals	17q25.3	17	81120022	AATK	AATK			ENSG00000181409	NA	NA	rs36000545	A	36000545	missense_variant	0	0.6043	3e-29	28.5229	NA	0.022	[0.018-0.026] unit increase	81120022	A	G	0.39651	0.99563117		G	A	0.112	-0.0083	0.049	-0.01182	0.789	0.00288	NA	NA
Appendicular lean mass	244,730 European ancestry women	17q25.3	17	81120022	AATK	AATK			ENSG00000181409	NA	NA	rs36000545	A	36000545	missense_variant	0	0.604	4e-18	17.3979	NA	0.02	[0.014-0.026] unit increase	81120022	A	G	0.39651	0.99563117		G	A	0.112	-0.0083	0.049	-0.01182	0.789	0.00288	NA	NA
Appendicular lean mass	450,243 European ancestry individuals	17q25.3	17	81445859	BAHCC1	BAHCC1			ENSG00000266074	NA	NA	rs28507130	A	28507130	intron_variant	0	0.3657	7e-23	22.1549	NA	0.0197	[0.016-0.024] unit increase	81445859	T	A	0.363941	0.99676183		A	T	0.522	-0.0034	0.727	-0.00214	0.493	-0.00749	NA	NA
Appendicular lean mass	450,243 European ancestry individuals	17q25.3	17	82018065	ASPSCR1	ASPSCR1 - CENPX	ENSG00000169696	ENSG00000169689		659	637	rs4969474	A	4969474	regulatory_region_variant	1	0.4187	1e-10	10	NA	0.0123	[0.0086-0.016] unit decrease	82018065	A	G	0.580375	0.99753979		!G	G	0.285	0.0055	0.316	0.00591	0.689	0.00423	NA	NA
Appendicular lean mass	450,243 European ancestry individuals	17q25.3	17	82577115	FOXK2	FOXK2			ENSG00000141568	NA	NA	rs12602034	T	12602034	intron_variant	0	0.6353	4e-19	18.3979	NA	0.0176	[0.014-0.022] unit decrease	82577115	C	T	0.634909	0.99960495		!T	T	0.164	0.0074	0.0609	0.01131	0.601	-0.00577	NA	NA
Appendicular lean mass	450,243 European ancestry individuals	17p13.1	17	9029877	NTN1	NTN1			ENSG00000065320	NA	NA	rs7223668	A	7223668	intron_variant	0	0.4712	2e-11	10.699	NA	0.0127	[0.009-0.0164] unit decrease	9029877	A	G	0.528268	0.99846797		!G	G	0.542	-0.0031	0.571	-0.00327	0.815	-0.0025	NA	NA
Appendicular lean mass	450,243 European ancestry individuals	18p11.32	18	125075	ROCK1P1	ROCK1P1 - USP14	ENSG00000263006	ENSG00000101557		6571	33308	rs4121583	T	4121583	intergenic_variant	1	0.6192	5e-09	8.30103	NA	0.0118	[0.0079-0.0157] unit increase	125075	C	T	0.61739	0.983379		!T	T	0.074	-0.0096	0.426	-0.0049	0.0258	-0.02441	NA	NA
Appendicular lean mass	205,513 European ancestry men	18p11.21	18	13116433	CEP192	CEP192			ENSG00000101639	NA	NA	rs1786263	T	1786263	missense_variant	0	0.606	5e-13	12.301	NA	0.02	[0.014-0.026] unit decrease	13116433	G	T	0.602775	0.99980896		!T	T	0.0533	0.01	0.0683	0.01081	0.487	0.00749	NA	NA
Appendicular lean mass	244,730 European ancestry women	18p11.21	18	13116433	CEP192	CEP192			ENSG00000101639	NA	NA	rs1786263	T	1786263	missense_variant	0	0.606	1e-13	13	NA	0.02	[0.014-0.026] unit decrease	13116433	G	T	0.602775	0.99980896		!T	T	0.0533	0.01	0.0683	0.01081	0.487	0.00749	NA	NA
Appendicular lean mass	450,243 European ancestry individuals	18p11.21	18	13116433	CEP192	CEP192			ENSG00000101639	NA	NA	rs1786263	T	1786263	missense_variant	0	0.6055	1e-22	22	NA	0.019	[0.015-0.023] unit decrease	13116433	G	T	0.602775	0.99980896		!T	T	0.0533	0.01	0.0683	0.01081	0.487	0.00749	NA	NA
Appendicular lean mass	450,243 European ancestry individuals	18q11.2	18	21511071	GREB1L	GREB1L			ENSG00000141449	NA	NA	rs72882867	T	72882867	intron_variant	0	0.0429	1e-12	12	NA	0.0335	[0.024-0.043] unit decrease	21511071	C	T	0.0426735	0.99967689		T	C	0.17	0.018	0.264	0.01609	0.389	0.02787	NA	NA
Appendicular lean mass	450,243 European ancestry individuals	18q11.2	18	23135692	CABLES1	CABLES1			ENSG00000134508	NA	NA	rs113232639	A	113232639	5_prime_UTR_variant	0	0.493	5e-64	63.301	NA	0.0327	[0.029-0.036] unit increase	23135692	G	A	0.498404	0.99723387		!A	A	0.397	-0.0044	0.418	-0.00478	0.775	-0.00307	NA	NA
Appendicular lean mass	450,243 European ancestry individuals	18q12.2	18	35459142	AC007998.2	ZNF24TR, INO80C			ENSG00000267583, ENSG00000153391	NA	NA	rs9957318	A	9957318	intron_variant	0	0.652	1e-20	20	NA	0.0187	[0.015-0.023] unit decrease	35459142	A	G	0.348902	0.9961809		G	A	0.105	0.0087	0.0254	0.0137	0.512	-0.00711	NA	NA
Appendicular lean mass	450,243 European ancestry individuals	18q12.2	18	37599845	AC009899.1	CELF4 - MIR4318	ENSG00000101489	ENSG00000266530		34018	57290	rs12962050	A	12962050	intron_variant	1	0.6445	2e-14	13.699	NA	0.0153	[0.011-0.019] unit increase	37599845	G	A	0.645358	0.99904041		!A	A	2.41e-05	-0.0225	0.000168	-0.02301	0.0545	-0.02095	1	1
Appendicular lean mass	450,243 European ancestry individuals	18q12.3	18	43884635	intergenic	SYT4 - RNA5SP455	ENSG00000132872	ENSG00000202060		607100	186948	rs1460510	T	1460510	intergenic_variant	1	0.2748	1e-09	9	NA	0.0129	[0.0088-0.017] unit increase	43884635	C	T	0.274775	0.9992969		T	C	0.927	-5e-04	0.409	-0.00541	0.202	0.0148	NA	NA
Appendicular lean mass	450,243 European ancestry individuals	18q21.1	18	48990098	intergenic	SMAD7 - DYM-AS1	ENSG00000101665	ENSG00000264269		39133	33605	rs7229520	A	7229520	intergenic_variant	1	0.6616	3e-34	33.5229	NA	0.0234	[0.02-0.027] unit decrease	48990098	G	A	0.660539	0.99840086		!A	A	0.266	0.0061	0.168	0.00855	0.828	-0.0025	NA	NA
Appendicular lean mass	450,243 European ancestry individuals	18q21.1	18	49085472	DYM	DYM			ENSG00000141627	NA	NA	rs33973388	T	33973388	intron_variant	0	0.4353	1e-38	38	NA	0.0249	[0.021-0.029] unit increase	49085472	G	T	0.434328	0.99961521		T	G	0.0913	-0.0086	0.245	-0.00679	0.164	-0.0148	NA	NA
Appendicular lean mass	450,243 European ancestry individuals	18q21.1	18	49116959	DYM	DYM			ENSG00000141627	NA	NA	rs73441521	T	73441521	intron_variant	0	0.9489	2e-09	8.69897	NA	0.0247	[0.017-0.033] unit increase	49116959	T	C	0	nan		NA	NA	NA	NA	NA	NA	NA	NA	NA	NA
Appendicular lean mass	450,243 European ancestry individuals	18q21.1	18	49116959	DYM	DYM			ENSG00000141627	NA	NA	rs73441521	T	73441521	intron_variant	0	0.9489	2e-09	8.69897	NA	0.0247	[0.017-0.033] unit increase	49116959	T	G	0.0506077	0.99941332		G	T	0.131	0.0166	0.0484	0.02627	0.829	-0.00423	NA	NA
Appendicular lean mass	450,243 European ancestry individuals	18q21.32	18	59515676	CCBE1	CCBE1			ENSG00000183287	NA	NA	rs17065909	T	17065909	intron_variant	0	0.176	1e-15	15	NA	0.0199	[0.015-0.025] unit decrease	59515676	C	T	0.174042	0.99966626		T	C	0.948	-3e-04	0.958	0.00038	0.796	-0.00327	NA	NA
Appendicular lean mass	450,243 European ancestry individuals	18q23	18	77260182	GALR1	GALR1			ENSG00000166573	NA	NA	rs74494415	T	74494415	intron_variant	0	0.0398	2e-17	16.699	NA	0.0417	[0.032-0.051] unit decrease	77260182	C	T	0.0393361	0.99714569		T	C	0.0149	-0.026	0.000723	-0.05003	0.992	0.00019	1	1
Appendicular lean mass	450,243 European ancestry individuals	18q23	18	79422836	NFATC1	NFATC1			ENSG00000131196	NA	NA	rs60389750	T	60389750	intron_variant	0	0.3139	1e-16	16	NA	0.0175	[0.013-0.022] unit decrease	79422836	C	T	0.310572	0.98909714		T	C	0.629	-0.0027	0.306	-0.00641	0.375	0.01038	NA	NA
Appendicular lean mass	450,243 European ancestry individuals	19p13.2	19	10210073	DNMT1	DNMT1			ENSG00000130816	NA	NA	rs8104479	A	8104479	intron_variant	0	0.1506	9e-12	11.0458	NA	0.0171	[0.012-0.022] unit decrease	10210073	G	A	0.151084	0.99824934		A	G	0.00995	-0.0182	0.0105	-0.02087	0.474	-0.01019	1	1
Appendicular lean mass	450,243 European ancestry individuals	19p13.2	19	10644229	SLC44A2	SLC44A2			ENSG00000129353	NA	NA	rs10948	T	10948	3_prime_UTR_variant	0	0.6638	3e-36	35.5229	NA	0.0252	[0.021-0.029] unit decrease	10644229	G	T	0.663633	0.99983744		!T	T	0.81	0.0013	0.575	0.00339	0.569	-0.00673	NA	NA
Appendicular lean mass	450,243 European ancestry individuals	19p13.2	19	11151801	SPC24	SPC24			ENSG00000161888	NA	NA	rs2421206	T	2421206	intron_variant	0	0.6567	4e-18	17.3979	NA	0.0177	[0.014-0.022] unit increase	11151801	T	G	0.345723	0.99404913		G	T	0.839	0.0011	0.757	0.00189	0.889	-0.00154	NA	NA
Appendicular lean mass	450,243 European ancestry individuals	19p13.13	19	13153584	STX10	IER2			ENSG00000160888	NA	NA	rs1042164	T	1042164	missense_variant	0	0.1837	2e-12	11.699	NA	0.0172	[0.012-0.022] unit decrease	13153584	C	T	0.186642	0.99980198		T	C	0.0322	-0.0141	0.196	-0.00968	0.0344	-0.0294	1	1
Appendicular lean mass	450,243 European ancestry individuals	19p13.11	19	17108295	MYO9B	MYO9B			ENSG00000099331	NA	NA	rs7246865	A	7246865	intron_variant	0	0.2606	1e-21	21	NA	0.0208	[0.016-0.025] unit decrease	17108295	G	A	0.257258	0.99735076		A	G	1.05e-07	-0.0316	2.49e-06	-0.03143	0.0134	-0.03248	1	1
Appendicular lean mass	450,243 European ancestry individuals	19p13.11	19	17351285	PLVAP	GTPBP3 - PLVAP	ENSG00000130299	ENSG00000130300		8554	165	rs7260450	T	7260450	intergenic_variant	1	0.3723	1e-12	12	NA	0.0137	[0.01-0.0174] unit decrease	17351285	T	G	0.626937	0.99268104		!G	G	0.0692	-0.0096	0.093	-0.01018	0.474	-0.00788	NA	NA
Appendicular lean mass	450,243 European ancestry individuals	19p13.11	19	18283740	JUND	MIR3188 - RPL39P38	ENSG00000267959	ENSG00000241464		1579	1603	rs10686842	T	10686842	regulatory_region_variant	1	0.3676	7e-24	23.1549	NA	0.0199	[0.016-0.024] unit decrease	18283739	T	TAAA	0.632711	0.99954219		!TAAA	TAAA	1.66e-09	-0.032	8.03e-08	-0.03243	0.00596	-0.03056	NA	1
Appendicular lean mass	450,243 European ancestry individuals	19p13.11	19	18283740	JUND	MIR3188 - RPL39P38	ENSG00000267959	ENSG00000241464		1579	1603	rs10686842	T	10686842	regulatory_region_variant	1	0.3676	7e-24	23.1549	NA	0.0199	[0.016-0.024] unit decrease	18283739	T	TAAAA	2.46688e-06	0.60945717		TAAAA	T	0.906	-0.1261	NA	NA	0.906	-0.12607	NA	NA
Appendicular lean mass	450,243 European ancestry individuals	19p13.11	19	19437430	GATAD2A	GATAD2A			ENSG00000167491	NA	NA	rs34647936	T	34647936	intron_variant	0	0.8146	4e-24	23.3979	NA	0.0248	[0.02-0.03] unit increase	19437430	T	G	0.186111	0.99991506		G	T	0.545	-0.0039	0.24	-0.0088	0.399	0.01115	NA	NA
Appendicular lean mass	450,243 European ancestry individuals	19p13.3	19	2175006	DOT1L	DOT1L			ENSG00000104885	NA	NA	rs8112948	A	8112948	intron_variant	0	0.2856	4e-42	41.3979	NA	0.0297	[0.025-0.034] unit decrease	2175006	T	A	0.30382	0.99753035		A	T	0.591	0.0029	0.884	-0.00088	0.135	0.01806	NA	NA
Appendicular lean mass	450,243 European ancestry individuals	19q13.11	19	33444196	PEPD	PEPD			ENSG00000124299	NA	NA	rs2287821	T	2287821	intron_variant	0	0.5091	7e-16	15.1549	NA	0.0153	[0.012-0.019] unit decrease	33444196	C	T	0.51068	0.99984175		!T	T	0.0357	0.0107	0.195	0.00754	0.0447	0.02133	1	1
Appendicular lean mass	450,243 European ancestry individuals	19p13.3	19	3458338	NFIC	NFIC			ENSG00000141905	NA	NA	rs12610084	A	12610084	intron_variant	0	0.2017	1e-13	13	NA	0.017	[0.012-0.022] unit increase	3458338	G	A	0.202438	0.99593661		A	G	0.278	0.0068	0.45	0.00553	0.395	0.01038	NA	NA
Appendicular lean mass	450,243 European ancestry individuals	19q13.11	19	35063575	HPN	HPN, HPN-AS1			ENSG00000105707, ENSG00000227392	NA	NA	rs28616221	A	28616221	intron_variant	0	0.1794	6e-14	13.2218	NA	0.0186	[0.014-0.023] unit decrease	35063575	G	A	0.181746	0.99918341		A	G	0.472	0.0048	0.507	0.00503	0.776	0.00404	NA	NA
Appendicular lean mass	450,243 European ancestry individuals	19p13.3	19	3575345	HMG20B	HMG20B			ENSG00000064961	NA	NA	rs56208656	A	56208656	intron_variant	0	0.1103	3e-17	16.5229	NA	0.0284	[0.022-0.035] unit decrease	3575345	G	A	0.11616	0.97737523		A	G	0.74	-0.0027	0.472	-0.00654	0.482	0.01288	NA	NA
Appendicular lean mass	450,243 European ancestry individuals	19q13.12	19	36174625	AC002984.1	COX7A1 - ZNF565	ENSG00000161281	ENSG00000196357		22176	7651	rs7249000	C	7249000	intergenic_variant	1	0.8363	2e-09	8.69897	NA	0.0154	[0.01-0.02] unit decrease	36174625	C	G	0.163826	0.99816703		G	C	0.00219	0.0213	0.0078	0.02087	0.128	0.02268	1	1
Appendicular lean mass	450,243 European ancestry individuals	19q13.12	19	37079817	ZNF420	ZNF420			ENSG00000197050	NA	NA	rs62108897	A	62108897	intron_variant	0	0.5246	8e-19	18.0969	NA	0.0171	[0.013-0.021] unit decrease	37079817	C	A	0.524371	0.99987905		A	C	0.558	-0.0031	0.868	0.00101	0.139	-0.01576	NA	NA
Appendicular lean mass	244,730 European ancestry women	19q13.2	19	38486015	RYR1	RYR1			ENSG00000196218	NA	NA	rs34934920	T	34934920	missense_variant	0	0.025	6e-06	5.22185	NA	0.04	[0.024-0.056] unit decrease	38486015	C	T	0.0253214	0.9987585		T	C	0.0992	-0.0268	0.0354	-0.03885	0.673	0.01441	NA	NA
Appendicular lean mass	450,243 European ancestry individuals	19q13.2	19	38486015	RYR1	RYR1			ENSG00000196218	NA	NA	rs34934920	T	34934920	missense_variant	0	0.025	4e-09	8.39794	NA	0.036	[0.024-0.048] unit decrease	38486015	C	T	0.0253214	0.9987585		T	C	0.0992	-0.0268	0.0354	-0.03885	0.673	0.01441	NA	NA
Appendicular lean mass	450,243 European ancestry individuals	19q13.2	19	40611394	LTBP4	LTBP4			ENSG00000090006	NA	NA	rs34093919	A	34093919	missense_variant	0	0.0121	3e-13	12.5229	NA	0.0632	[0.046-0.08] unit decrease	40611394	G	A	0.0124691	0.99522447		A	G	0.079	0.039	0.155	0.03709	0.298	0.0442	NA	NA
Appendicular lean mass	244,730 European ancestry women	19q13.2	19	40611394	LTBP4	LTBP4			ENSG00000090006	NA	NA	rs34093919	A	34093919	missense_variant	0	0.012	2e-07	6.69897	NA	0.06	[0.036-0.084] unit decrease	40611394	G	A	0.0124691	0.99522447		A	G	0.079	0.039	0.155	0.03709	0.298	0.0442	NA	NA
Appendicular lean mass	205,513 European ancestry men	19q13.2	19	40611394	LTBP4	LTBP4			ENSG00000090006	NA	NA	rs34093919	A	34093919	missense_variant	0	0.012	8e-07	6.09691	NA	0.06	[0.035-0.085] unit decrease	40611394	G	A	0.0124691	0.99522447		A	G	0.079	0.039	0.155	0.03709	0.298	0.0442	NA	NA
Appendicular lean mass	450,243 European ancestry individuals	19q13.31	19	43595611	ZNF576	IRGQ			ENSG00000167378	NA	NA	rs304724	T	304724	intron_variant	0	0.5322	1e-10	10	NA	0.0122	[0.0085-0.0159] unit increase	43595611	C	T	0.530774	0.9998531		!T	T	0.824	-0.0011	0.504	-0.0039	0.455	0.00788	NA	NA
Appendicular lean mass	450,243 European ancestry individuals	19p13.3	19	4366222	SH3GL1	SH3GL1			ENSG00000141985	NA	NA	rs732716	A	732716	intron_variant	0	0.7038	6e-16	15.2218	NA	0.0168	[0.013-0.021] unit decrease	4366222	A	G	0.297717	0.99635621		G	A	0.932	3e-04	0.952	-0.00038	0.715	0.00442	NA	NA
Appendicular lean mass	450,243 European ancestry individuals	19p13.3	19	4502189	PLIN4	HDGFL2			ENSG00000167674	NA	NA	rs8887	T	8887	3_prime_UTR_variant	0	0.4284	8e-12	11.0969	NA	0.0132	[0.0095-0.0169] unit increase	4502189	T	C	0.576049	0.99495386		!C	C	0.0246	0.0117	0.0415	0.01207	0.339	0.01038	NA	1
Appendicular lean mass	450,243 European ancestry individuals	19p13.3	19	4502189	PLIN4	HDGFL2			ENSG00000167674	NA	NA	rs8887	T	8887	3_prime_UTR_variant	0	0.4284	8e-12	11.0969	NA	0.0132	[0.0095-0.0169] unit increase	4502189	T	G	0	nan		NA	NA	NA	NA	NA	NA	NA	NA	NA	NA
Appendicular lean mass	450,243 European ancestry individuals	19q13.32	19	46784893	SLC1A5	SLC1A5			ENSG00000105281	NA	NA	rs8105903	A	8105903	5_prime_UTR_variant	0	0.5496	2e-12	11.699	NA	0.0132	[0.0095-0.0169] unit increase	46784893	C	A	0.548476	0.99697721		!A	A	0.0809	-0.009	0.0199	-0.0137	0.549	0.00634	NA	NA
Appendicular lean mass	450,243 European ancestry individuals	19q13.32	19	47221307	BBC3	BBC3			ENSG00000105327	NA	NA	rs45474992	T	45474992	3_prime_UTR_variant	0	0.0362	2e-33	32.699	NA	0.0617	[0.052-0.072] unit decrease	47221307	C	T	0.0371653	0.9952679		T	C	0.149	-0.0152	0.0327	-0.03306	0.947	0.00173	NA	NA
Appendicular lean mass	450,243 European ancestry individuals	19p13.3	19	4742453	intergenic	DPP9 - MIR7-3HG	ENSG00000142002	ENSG00000176840		17780	26578	rs7508325	A	7508325	regulatory_region_variant	1	0.1839	2e-13	12.699	NA	0.0174	[0.013-0.022] unit decrease	4742453	G	A	0.184075	0.99628158		A	G	0.401	0.0056	0.63	0.00365	0.381	0.0123	NA	NA
Appendicular lean mass	450,243 European ancestry individuals	19p13.3	19	4910009	UHRF1	UHRF1			ENSG00000276043	NA	NA	rs2602713	A	2602713	intron_variant	0	0.5603	2e-29	28.699	NA	0.0217	[0.018-0.025] unit decrease	4910009	A	C	0.440859	0.9952325		C	A	0.903	3e-04	0.803	0.00151	0.944	-0.00077	NA	NA
Appendicular lean mass	450,243 European ancestry individuals	19p13.3	19	4910009	UHRF1	UHRF1			ENSG00000276043	NA	NA	rs2602713	A	2602713	intron_variant	0	0.5603	2e-29	28.699	NA	0.0217	[0.018-0.025] unit decrease	4910009	A	T	2.90479e-06	0.80914104		NA	NA	NA	NA	NA	NA	NA	NA	NA	NA
Appendicular lean mass	450,243 European ancestry individuals		NA	NA	AP2A1					NA	NA	chr19:50281090	T	NA		1	0.5185	7e-20	19.1549	NA	0.0175	[0.014-0.021] unit increase	50281090	G	A	0	nan		NA	NA	NA	NA	NA	NA	NA	NA	NA	NA
Appendicular lean mass	450,243 European ancestry individuals	19q13.42	19	54251270	LILRB5	LILRB5			ENSG00000105609	NA	NA	rs12986064	T	12986064	non_coding_transcript_exon_variant	0	0.4889	4e-14	13.3979	NA	0.0148	[0.011-0.019] unit decrease	54251270	T	C	0.605942	0.90766461		!C	C	0.333	-0.0058	0.654	-0.00302	0.211	-0.01653	NA	NA
Appendicular lean mass	450,243 European ancestry individuals	19q13.42	19	54251270	LILRB5	LILRB5			ENSG00000105609	NA	NA	rs12986064	T	12986064	non_coding_transcript_exon_variant	0	0.4889	4e-14	13.3979	NA	0.0148	[0.011-0.019] unit decrease	54251270	T	G	5.04895e-06	0.87641995		NA	NA	NA	NA	NA	NA	NA	NA	NA	NA
Appendicular lean mass	205,513 European ancestry men	19q13.42	19	55368304	IL11	IL11			ENSG00000095752	NA	NA	rs4252548	T	4252548	missense_variant	0	0.022	8e-18	17.0969	NA	0.08	[0.062-0.098] unit decrease	55368304	C	T	0.0215277	0.99381347		T	C	0.03	-0.0387	0.0445	-0.04086	0.397	-0.03152	1	1
Appendicular lean mass	450,243 European ancestry individuals	19q13.42	19	55368304	IL11	IL11			ENSG00000095752	NA	NA	rs4252548	T	4252548	missense_variant	0	0.0218	5e-35	34.301	NA	0.0774	[0.065-0.09] unit decrease	55368304	C	T	0.0215277	0.99381347		T	C	0.03	-0.0387	0.0445	-0.04086	0.397	-0.03152	1	1
Appendicular lean mass	244,730 European ancestry women	19q13.42	19	55368304	IL11	IL11			ENSG00000095752	NA	NA	rs4252548	T	4252548	missense_variant	0	0.022	7e-19	18.1549	NA	0.08	[0.064-0.096] unit decrease	55368304	C	T	0.0215277	0.99381347		T	C	0.03	-0.0387	0.0445	-0.04086	0.397	-0.03152	1	1
Appendicular lean mass	450,243 European ancestry individuals	19q13.42	19	55482069	ZNF628	ZNF628			ENSG00000197483	NA	NA	rs147110934	T	147110934	missense_variant	0	0.0243	9e-32	31.0458	NA	0.0722	[0.06-0.084] unit decrease	55482069	G	T	0.0240294	0.99887681		T	G	0.0762	-0.0315	0.194	-0.02451	0.0991	-0.08859	NA	NA
Appendicular lean mass	244,730 European ancestry women	19q13.42	19	55482069	ZNF628	ZNF628			ENSG00000197483	NA	NA	rs147110934	T	147110934	missense_variant	0	0.024	2e-13	12.699	NA	0.06	[0.044-0.076] unit decrease	55482069	G	T	0.0240294	0.99887681		T	G	0.0762	-0.0315	0.194	-0.02451	0.0991	-0.08859	NA	NA
Appendicular lean mass	205,513 European ancestry men	19q13.42	19	55482069	ZNF628	ZNF628			ENSG00000197483	NA	NA	rs147110934	T	147110934	missense_variant	0	0.024	3e-22	21.5229	NA	0.09	[0.072-0.108] unit decrease	55482069	G	T	0.0240294	0.99887681		T	G	0.0762	-0.0315	0.194	-0.02451	0.0991	-0.08859	NA	NA
Appendicular lean mass	450,243 European ancestry individuals	19q13.43	19	57397577	AC003002.1	ZNF548			ENSG00000188785	NA	NA	rs55706256	T	55706256	intron_variant	0	0.3783	9e-13	12.0458	NA	0.014	[0.01-0.018] unit increase	57397577	G	T	0.377206	0.99962647		T	G	0.0263	0.0118	0.0497	0.01182	0.297	0.01191	1	1
Appendicular lean mass	450,243 European ancestry individuals	19p13.2	19	7114202	INSR	INSR			ENSG00000171105	NA	NA	rs1864193	A	1864193	3_prime_UTR_variant	0	0.1416	5e-16	15.301	NA	0.0226	[0.017-0.028] unit decrease	7114202	C	A	0.141699	0.99013582		A	C	0.00218	-0.0227	0.00593	-0.02301	0.177	-0.02172	1	1
Appendicular lean mass	450,243 European ancestry individuals	19p13.2	19	7907730	MAP2K7	MAP2K7			ENSG00000076984	NA	NA	rs8107967	A	8107967	intron_variant	0	0.4341	1e-19	19	NA	0.0174	[0.014-0.021] unit increase	7907730	A	G	0.568228	0.99756338		!G	G	0.000101	0.02	0.00205	0.0181	0.0137	0.02633	NA	1
Appendicular lean mass	450,243 European ancestry individuals	19p13.2	19	8472212	HNRNPM	HNRNPM			ENSG00000099783	NA	NA	rs35279560	T	35279560	intron_variant	0	0.3091	1e-13	13	NA	0.015	[0.011-0.019] unit increase	8472212	G	T	0.304877	0.99983261		T	G	0.0355	0.0118	0.0685	0.01157	0.293	0.01249	1	1
Appendicular lean mass	450,243 European ancestry individuals	19p13.2	19	8605262	ADAMTS10	ADAMTS10			ENSG00000142303	NA	NA	rs62621197	T	62621197	missense_variant	0	0.0372	1e-17	17	NA	0.0446	[0.034-0.055] unit decrease	8605262	C	T	0.0365513	0.98747742		T	C	0.00155	0.0385	4.54e-05	0.06399	0.961	0.00173	NA	1
Appendicular lean mass	244,730 European ancestry women	19p13.2	19	8605262	ADAMTS10	ADAMTS10			ENSG00000142303	NA	NA	rs62621197	T	62621197	missense_variant	0	0.037	4e-11	10.3979	NA	0.04	[0.026-0.054] unit decrease	8605262	C	T	0.0365513	0.98747742		T	C	0.00155	0.0385	4.54e-05	0.06399	0.961	0.00173	NA	1
Appendicular lean mass	205,513 European ancestry men	19p13.2	19	8605262	ADAMTS10	ADAMTS10			ENSG00000142303	NA	NA	rs62621197	T	62621197	missense_variant	0	0.037	2e-08	7.69897	NA	0.04	[0.024-0.056] unit decrease	8605262	C	T	0.0365513	0.98747742		T	C	0.00155	0.0385	4.54e-05	0.06399	0.961	0.00173	NA	1
Appendicular lean mass	450,243 European ancestry individuals	19p13.2	19	9387943	AC011451.3	ZNF559-ZNF177 - ZNF266	ENSG00000270011	ENSG00000174652		5326	24486	rs35915221	CA	35915221	intron_variant	1	0.5866	3e-12	11.5229	NA	0.0134	[0.0097-0.0171] unit increase	9387942	C	CA	0.584522	0.99980432		!CA	CA	0.175	-0.007	0.408	-0.0049	0.19	-0.01403	NA	NA
Appendicular lean mass	450,243 European ancestry individuals	19p13.2	19	9387943	AC011451.3	ZNF559-ZNF177 - ZNF266	ENSG00000270011	ENSG00000174652		5326	24486	rs35915221	CA	35915221	intron_variant	1	0.5866	3e-12	11.5229	NA	0.0134	[0.0097-0.0171] unit increase	9387942	C	CAA	0.00263091	0.98639037		CAA	C	0.767	-0.0167	0.787	-0.01521	0.612	-0.54116	NA	NA
Appendicular lean mass	450,243 European ancestry individuals	19p13.2	19	9890249	OLFM2	OLFM2			ENSG00000105088	NA	NA	rs12979274	T	12979274	intron_variant	0	0.4845	3e-16	15.5229	NA	0.0155	[0.012-0.019] unit decrease	9890249	T	C	0.513578	0.99977736		!C	C	3.33e-05	-0.0212	4.54e-05	-0.02376	0.233	-0.01268	NA	1
Appendicular lean mass	450,243 European ancestry individuals	2q12.2	2	105373259	FHL2	FHL2			ENSG00000115641	NA	NA	rs6738207	A	6738207	intron_variant	0	0.4007	4e-11	10.3979	NA	0.0127	[0.009-0.0164] unit increase	105373259	G	A	0.40134	0.99849648		A	G	0.0858	-0.009	0.234	-0.00717	0.164	-0.01499	NA	NA
Appendicular lean mass	450,243 European ancestry individuals	2q13	2	111188879	MIR4435-2HG	MIR4435-2HG			ENSG00000172965	NA	NA	rs10199020	A	10199020	intron_variant	0	0.494	3e-14	13.5229	NA	0.013	[0.0097-0.0163] unit increase	111188879	T	A	0.497697	0.99926239		!A	A	0.546	-0.003	0.793	-0.00151	0.434	-0.00826	NA	NA
Appendicular lean mass	450,243 European ancestry individuals	2q13	2	111498743	AC017002.3	MIR4435-2HG, SOCAR			ENSG00000172965, ENSG00000240350	NA	NA	rs201570119	T	201570119	intron_variant	0	0.7902	5e-17	16.301	NA	0.0194	[0.015-0.024] unit decrease	111498743	T	C	0.209078	0.99804832		C	T	0.000182	0.0236	0.000736	0.02439	0.103	0.02095	1	1
Appendicular lean mass	450,243 European ancestry individuals	2q13	2	112023392	MERTK	MERTK			ENSG00000153208	NA	NA	rs55812028	T	55812028	intron_variant	0	0.2451	4e-13	12.3979	NA	0.0158	[0.011-0.02] unit increase	112023392	C	T	0.245832	0.99913966		T	C	0.878	-5e-04	0.772	-0.00201	0.951	0.00077	NA	NA
Appendicular lean mass	450,243 European ancestry individuals	2q14.2	2	118798299	LINC01956	LINC01956			ENSG00000258910	NA	NA	rs141033892	A	141033892	intron_variant	0	0.0504	2e-09	8.69897	NA	0.0261	[0.017-0.035] unit increase	118798299	G	A	0.0521607	0.99495851		A	G	0.199	0.0153	0.216	0.01622	0.701	0.01095	NA	NA
Appendicular lean mass	450,243 European ancestry individuals	2q14.2	2	120713483	AC018866.1	Y_RNA - GLI2	ENSG00000201134	ENSG00000074047		62109	22140	rs12463948	A	12463948	regulatory_region_variant	1	0.8117	3e-13	12.5229	NA	0.0171	[0.013-0.022] unit increase	120713483	A	T	0.186365	0.9972565		T	A	0.0179	-0.016	0.0166	-0.01823	0.597	-0.00769	1	1
Appendicular lean mass	450,243 European ancestry individuals	2q14.2	2	120821192	GLI2	GLI2			ENSG00000074047	NA	NA	rs13392139	A	13392139	intron_variant	0	0.9347	2e-13	12.699	NA	0.0281	[0.021-0.036] unit increase	120821192	A	G	0.0641239	0.99668968		G	A	0.173	-0.0134	0.841	-0.00239	0.0331	-0.03747	NA	NA
Appendicular lean mass	450,243 European ancestry individuals	2q14.3	2	124597512	CNTNAP5	CNTNAP5			ENSG00000155052	NA	NA	rs13019539	A	13019539	intron_variant	0	0.4	1e-09	9	NA	0.0116	[0.0079-0.0153] unit increase	124597512	G	A	0.403182	0.99753122		A	G	0.261	0.0059	0.173	0.00817	0.876	-0.00173	NA	NA
Appendicular lean mass	450,243 European ancestry individuals	2q14.3	2	127104190	BIN1	BIN1			ENSG00000136717	NA	NA	rs4663096	A	4663096	intron_variant	0	0.1794	2e-09	8.69897	NA	0.0148	[0.01-0.02] unit increase	127104190	T	A	0.18033	0.99937931		A	T	0.00383	0.0193	0.0033	0.02225	0.519	0.00903	1	1
Appendicular lean mass	450,243 European ancestry individuals	2q22.3	2	143446635	ARHGAP15	ARHGAP15			ENSG00000075884	NA	NA	rs537526720	CT	537526720	intron_variant	0	0.0787	2e-11	10.699	NA	0.0237	[0.017-0.031] unit increase	143446634	C	CTT	3.63341e-05	0.85193526		CTT	C	NA	NA	1	-0.00478	NA	NA	NA	NA
Appendicular lean mass	450,243 European ancestry individuals	2q22.3	2	143446635	ARHGAP15	ARHGAP15			ENSG00000075884	NA	NA	rs537526720	CT	537526720	intron_variant	0	0.0787	2e-11	10.699	NA	0.0237	[0.017-0.031] unit increase	143446634	CT	C	0.000315162	0.93780514		C	CT	0.223	-0.1955	0.223	-0.19548	NA	NA	NA	NA
Appendicular lean mass	450,243 European ancestry individuals	2q22.3	2	143446635	ARHGAP15	ARHGAP15			ENSG00000075884	NA	NA	rs537526720	CT	537526720	intron_variant	0	0.0787	2e-11	10.699	NA	0.0237	[0.017-0.031] unit increase	143446634	CT	CTT	0.0756199	0.99916205		CTT	CT	0.289	0.0104	0.146	0.01634	0.659	-0.00903	NA	NA
Appendicular lean mass	450,243 European ancestry individuals	2p24.3	2	15983051	intergenic	RN7SL104P - GACAT3	ENSG00000243541	ENSG00000236289		32070	30877	rs6735681	T	6735681	intergenic_variant	1	0.8908	2e-19	18.699	NA	0.0275	[0.022-0.033] unit increase	15983051	T	C	0.109289	0.99424133		C	T	0.283	-0.0068	0.115	-0.01483	0.948	-0.00096	NA	NA
Appendicular lean mass	450,243 European ancestry individuals	2q24.2	2	160203297	ITGB6	ITGB6 - LINC02478	ENSG00000115221	ENSG00000285373		2984	54419	rs3101041	A	3101041	intron_variant	1	0.7304	3e-10	9.52288	NA	0.0135	[0.0094-0.0176] unit decrease	160203297	A	C	0.253848	0.99952934		C	A	0.525	0.0037	0.367	0.00603	0.735	-0.00423	NA	NA
Appendicular lean mass	450,243 European ancestry individuals	2q24.3	2	164672114	COBLL1	COBLL1			ENSG00000082438	NA	NA	rs1128249	T	1128249	intron_variant	0	0.3919	3e-25	24.5229	NA	0.0199	[0.016-0.024] unit decrease	164672114	G	T	0.392598	0.99978438		T	G	2.29e-15	-0.0413	3.15e-11	-0.03973	1.31e-05	-0.04612	1	1
Appendicular lean mass	450,243 European ancestry individuals	2q24.3	2	168260515	intergenic	STK39 - RN7SL813P	ENSG00000198648	ENSG00000241074		12920	190809	rs2102808	T	2102808	intergenic_variant	1	0.1193	1e-11	11	NA	0.0197	[0.014-0.025] unit increase	168260515	G	T	0.11899	0.99861835		T	G	0.215	0.0098	0.62	0.00453	0.102	0.02614	NA	NA
Appendicular lean mass	450,243 European ancestry individuals	2q24.3	2	168851042	NOSTRIN	NOSTRIN, SPC25			ENSG00000163072, ENSG00000152253	NA	NA	rs488621	A	488621	intron_variant	0	0.5312	3e-24	23.5229	NA	0.0191	[0.015-0.023] unit decrease	168851042	A	G	0.46917	0.99997172		G	A	0.11	0.0082	0.212	0.00729	0.295	0.01115	NA	NA
Appendicular lean mass	450,243 European ancestry individuals	2q31.1	2	170980385	intergenic	GORASP2 - TLK1	ENSG00000115806	ENSG00000198586		13255	10438	rs12151587	T	12151587	intergenic_variant	1	0.5811	6e-24	23.2218	NA	0.0192	[0.015-0.023] unit increase	170980385	T	C	0.41857	0.99816012		C	T	0.82	0.001	0.979	0.00013	0.608	0.00557	NA	NA
Appendicular lean mass	450,243 European ancestry individuals	2q31.1	2	171317753	METTL8	METTL8			ENSG00000123600	NA	NA	rs2111459	T	2111459	3_prime_UTR_variant	0	0.2425	2e-11	10.699	NA	0.0141	[0.01-0.0182] unit increase	171317753	T	C	0.757862	0.99828427		!C	C	0.847	-0.001	0.94	-5e-04	0.757	-0.00384	NA	NA
Appendicular lean mass	450,243 European ancestry individuals	2q31.1	2	171560359	CYBRD1	CYBRD1 - RPL21P38	ENSG00000071967	ENSG00000233934		2230	26734	rs55852614	T	55852614	regulatory_region_variant	1	0.7526	3e-73	72.5229	NA	0.0393	[0.035-0.044] unit increase	171560359	T	C	0.250482	0.99971027		C	T	0.0265	0.013	0.0718	0.01207	0.184	0.01614	NA	1
Appendicular lean mass	450,243 European ancestry individuals	2q31.1	2	173968239	SP3	SP3 - LINC01960	ENSG00000172845	ENSG00000260868		2866	57041	rs16862227	T	16862227	intergenic_variant	1	0.2301	5e-19	18.301	NA	0.02	[0.016-0.024] unit decrease	173968239	G	T	0.231991	0.99567733		T	G	0.893	-8e-04	0.799	-0.00176	0.848	0.0025	NA	NA
Appendicular lean mass	450,243 European ancestry individuals	2q31.1	2	176104478	HOXD11	HOXD11			ENSG00000128713	NA	NA	rs741610	A	741610	non_coding_transcript_exon_variant	0	0.6691	8e-14	13.0969	NA	0.0149	[0.011-0.019] unit decrease	176104478	A	G	0.331496	0.9992916		G	A	0.379	0.0048	0.133	0.0093	0.35	-0.01076	NA	NA
Appendicular lean mass	450,243 European ancestry individuals	2q31.2	2	177297858	AC019080.1	NFE2L2			ENSG00000116044	NA	NA	rs2444563	T	2444563	intron_variant	0	0.7921	9e-16	15.0458	NA	0.0186	[0.014-0.023] unit increase	177297858	C	T	0.791195	0.99958088		!T	T	0.756	-0.0015	0.979	0.00025	0.409	-0.01057	NA	NA
Appendicular lean mass	450,243 European ancestry individuals	2q31.2	2	177991084	PDE11A	PDE11A			ENSG00000128655	NA	NA	rs112405294	A	112405294	intron_variant	0	0.0821	8e-14	13.0969	NA	0.0256	[0.019-0.032] unit increase	177991084	G	A	0.0823042	0.99431863		A	G	0.806	-0.0024	0.634	-0.00503	0.654	0.01038	NA	NA
Appendicular lean mass	450,243 European ancestry individuals	2q31.2	2	178472537	FKBP7	FKBP7			ENSG00000079150	NA	NA	rs137968292	T	137968292	intron_variant	0	0.011	3e-10	9.52288	NA	0.056	[0.039-0.073] unit increase	178472537	C	T	0.0123371	0.99214193		T	C	0.197	0.0294	0.42	0.0215	0.246	0.05131	NA	NA
Appendicular lean mass	450,243 European ancestry individuals	2q32.1	2	182366635	PDE1A	PDE1A			ENSG00000115252	NA	NA	rs3063063	T	3063063	intron_variant	0	0.3138	3e-19	18.5229	NA	0.0182	[0.014-0.022] unit increase	182366634	T	TGAA	0.687368	0.99807355		!TGAA	TGAA	0.19	0.0073	0.179	0.00842	0.796	0.00307	NA	NA
Appendicular lean mass	450,243 European ancestry individuals	2q32.2	2	189198736	COL5A2	COL5A2			ENSG00000204262	NA	NA	rs34159739	T	34159739	intron_variant	0	0.1118	7e-15	14.1549	NA	0.0231	[0.017-0.029] unit increase	189198735	T	TAA	0.888882	0.99985388		!TAA	TAA	0.41	0.0068	0.149	0.01345	0.339	-0.01672	NA	NA
Appendicular lean mass	450,243 European ancestry individuals	2q32.2	2	190894347	GLS	GLS			ENSG00000115419	NA	NA	rs766899706	G	766899706	intron_variant	0	0.684	6e-12	11.2218	NA	0.0139	[0.01-0.0178] unit decrease	190894346	CG	C	0.000133454	0.94562719		C	CG	0.475	-0.1355	0.146	-0.47784	0.875	0.03651	NA	NA
Appendicular lean mass	450,243 European ancestry individuals	2q33.1	2	200295265	intergenic	MAIP1 - SPATS2L	ENSG00000162972	ENSG00000196141		286725	10616	rs295139	A	295139	intergenic_variant	1	0.4129	1e-13	13	NA	0.0141	[0.01-0.018] unit increase	200295265	T	A	0.411786	0.99919528		A	T	0.159	0.0074	0.393	0.00515	0.173	0.0148	NA	NA
Appendicular lean mass	450,243 European ancestry individuals	2q33.1	2	201114802	CFLAR	RPL17P10 - CFLAR	ENSG00000224672	ENSG00000003402		11845	1352	rs72931013	A	72931013	regulatory_region_variant	1	0.9792	6e-10	9.22185	NA	0.0411	[0.028-0.054] unit decrease	201114802	A	C	0.0198185	0.99896352		C	A	0.000212	0.0672	0.000144	0.07895	0.429	0.0294	1	1
Appendicular lean mass	450,243 European ancestry individuals	2p24.1	2	20287507	PUM2	PUM2			ENSG00000055917	NA	NA	rs201758865	G	201758865	intron_variant	0	0.9654	5e-18	17.301	NA	0.0444	[0.034-0.054] unit decrease	20287506	GAA	GA	5.00701e-05	0.93857481		GA	GAA	NA	NA	1	0.00088	NA	NA	NA	NA
Appendicular lean mass	450,243 European ancestry individuals	2q33.2	2	203256340	CYP20A1	CYP20A1			ENSG00000119004	NA	NA	rs72938315	C	72938315	intron_variant	0	0.8549	7e-15	14.1549	NA	0.0207	[0.015-0.026] unit decrease	203256340	C	G	0.14525	0.99917643		G	C	0.242	0.0087	0.463	0.00616	0.266	0.01768	NA	NA
Appendicular lean mass	450,243 European ancestry individuals	2q33.3	2	206216471	GPR1	CMKLR2, CMKLR2-AS			ENSG00000183671, ENSG00000279220	NA	NA	rs62195405	A	62195405	intron_variant	0	0.4259	9e-15	14.0458	NA	0.0147	[0.011-0.018] unit increase	206216471	A	G	0.571443	0.99686921		!G	G	0.409	0.0043	0.159	0.00842	0.414	-0.00865	NA	NA
Appendicular lean mass	450,243 European ancestry individuals	2q33.3	2	206216471	GPR1	CMKLR2, CMKLR2-AS			ENSG00000183671, ENSG00000279220	NA	NA	rs62195405	A	62195405	intron_variant	0	0.4259	9e-15	14.0458	NA	0.0147	[0.011-0.018] unit increase	206216471	A	T	1.30843e-05	0.94225033		T	A	0.147	-1.4488	0.147	-1.44884	NA	NA	NA	NA
Appendicular lean mass	450,243 European ancestry individuals	2q33.3	2	207136098	KLF7	KLF7			ENSG00000118263	NA	NA	rs1320929	A	1320929	intron_variant	0	0.4367	6e-13	12.2218	NA	0.0137	[0.01-0.0174] unit increase	207136098	G	A	0.440222	0.99698601		A	G	0.18	0.0069	0.0567	0.01131	0.512	-0.00692	NA	NA
Appendicular lean mass	205,513 European ancestry men	2q34	2	210675783	CPS1	CPS1			ENSG00000021826	NA	NA	rs1047891	A	1047891	missense_variant	0	0.316	2e-09	8.69897	NA	0.02	[0.014-0.026] unit increase	210675783	C	A	0.316159	0.99625036		A	C	2.53e-13	0.041	1.89e-14	0.0484	0.253	0.01384	1	1
Appendicular lean mass	244,730 European ancestry women	2q34	2	210675783	CPS1	CPS1			ENSG00000021826	NA	NA	rs1047891	A	1047891	missense_variant	0	0.316	6e-27	26.2218	NA	0.03	[0.024-0.036] unit increase	210675783	C	A	0.316159	0.99625036		A	C	2.53e-13	0.041	1.89e-14	0.0484	0.253	0.01384	1	1
Appendicular lean mass	450,243 European ancestry individuals	2q34	2	210675783	CPS1	CPS1			ENSG00000021826	NA	NA	rs1047891	A	1047891	missense_variant	0	0.3159	6e-31	30.2218	NA	0.0233	[0.019-0.027] unit increase	210675783	C	A	0.316159	0.99625036		A	C	2.53e-13	0.041	1.89e-14	0.0484	0.253	0.01384	1	1
Appendicular lean mass	450,243 European ancestry individuals	2q35	2	216749861	AC007563.2	DIRC3-AS1			ENSG00000233143	NA	NA	rs6754292	T	6754292	intron_variant	0	0.6446	2e-21	20.699	NA	0.0188	[0.015-0.023] unit increase	216749861	C	T	0.644357	0.99677289		!T	T	9.03e-11	-0.0347	1.42e-08	-0.03482	0.00169	-0.0344	1	1
Appendicular lean mass	450,243 European ancestry individuals	2q35	2	217268135	intergenic	DIRC3-AS1			ENSG00000233143	NA	NA	rs12622189	A	12622189	intron_variant	0	0.7422	1e-35	35	NA	0.0268	[0.023-0.031] unit increase	217268135	A	G	0.253121	0.99944383		G	A	0.059	-0.0113	0.0121	-0.01697	0.462	0.00961	NA	NA
Appendicular lean mass	450,243 European ancestry individuals	2q35	2	217744010	DIRC3	DIRC3			ENSG00000231672	NA	NA	rs76018285	A	76018285	intron_variant	0	0.9417	2e-13	12.699	NA	0.0304	[0.022-0.038] unit decrease	217744010	A	G	0.0585781	0.98520111		G	A	0.446	-0.0064	0.249	-0.01458	0.92	0.0025	NA	NA
Appendicular lean mass	450,243 European ancestry individuals	2q35	2	218323854	PNKD	PNKD			ENSG00000127838	NA	NA	rs10194082	T	10194082	intron_variant	0	0.5897	3e-27	26.5229	NA	0.0206	[0.017-0.024] unit increase	218323854	C	T	0.591015	0.99922973		!T	T	0.0213	-0.012	0.0689	-0.01081	0.142	-0.01576	1	1
Appendicular lean mass	450,243 European ancestry individuals	2q35	2	219140222	NHEJ1	NHEJ1			ENSG00000187736	NA	NA	rs145296160	T	145296160	intron_variant	0	0.9829	4e-15	14.3979	NA	0.0595	[0.045-0.074] unit increase	219140222	T	C	0.0190248	0.99122326		C	T	0.102	-0.0298	0.015	-0.05242	0.426	0.02729	NA	NA
Appendicular lean mass	450,243 European ancestry individuals	2q36.1	2	223091692	KCNE4	KCNE4			ENSG00000152049	NA	NA	rs6711710	T	6711710	intron_variant	0	0.2188	8e-40	39.0969	NA	0.03	[0.025-0.035] unit decrease	223091692	T	C	0.784763	0.99891897		!C	C	0.00428	-0.0179	0.033	-0.01521	0.0401	-0.02671	NA	1
Appendicular lean mass	450,243 European ancestry individuals	2q36.1	2	224183057	intergenic	USP21P1 - FAM124B	ENSG00000224826	ENSG00000124019		11520	195641	rs2629047	A	2629047	intergenic_variant	1	0.3943	2e-18	17.699	NA	0.0162	[0.012-0.02] unit decrease	224183057	T	A	0.395502	0.99737246		A	T	0.0232	-0.0119	0.0835	-0.01043	0.12	-0.01672	1	1
Appendicular lean mass	450,243 European ancestry individuals	2q36.2	2	224492608	CUL3	CUL3			ENSG00000036257	NA	NA	rs112567314	T	112567314	intron_variant	0	0.996	4e-33	32.3979	NA	0.1874	[0.16-0.22] unit decrease	224492608	T	C	0.00469671	0.99445474		C	T	0.8	0.0106	0.625	0.02074	0.227	-0.26962	NA	NA
Appendicular lean mass	450,243 European ancestry individuals		NA	NA	intergenic					NA	NA	chr2:225286049	A	NA		1	0.3645	5e-12	11.301	NA	0.0131	[0.0094-0.0168] unit increase	225286049	T	C	0	nan		NA	NA	NA	NA	NA	NA	NA	NA	NA	NA
Appendicular lean mass	450,243 European ancestry individuals	2q36.3	2	225887278	intergenic	NYAP2 - MIR5702	ENSG00000144460	ENSG00000263363		157391	771432	rs139441245	A	139441245	intergenic_variant	1	0.0109	2e-10	9.69897	NA	0.0595	[0.041-0.078] unit decrease	225887278	T	A	0.0115696	0.99126392		A	T	0.496	-0.0168	0.551	-0.01672	0.741	-0.0173	NA	NA
Appendicular lean mass	450,243 European ancestry individuals	2q36.3	2	226155778	intergenic	NYAP2 - MIR5702	ENSG00000144460	ENSG00000263363		425891	502932	rs1522802	A	1522802	regulatory_region_variant	1	0.2181	5e-13	12.301	NA	0.0171	[0.012-0.022] unit increase	226155778	A	C	0.78063	0.99638538		!C	C	8.57e-07	0.0307	2.09e-05	0.03005	0.013	0.03305	NA	1
Appendicular lean mass	450,243 European ancestry individuals	2q36.3	2	226155778	intergenic	NYAP2 - MIR5702	ENSG00000144460	ENSG00000263363		425891	502932	rs1522802	A	1522802	regulatory_region_variant	1	0.2181	5e-13	12.301	NA	0.0171	[0.012-0.022] unit increase	226155778	A	T	2.55717e-08	0.0091817935		NA	NA	NA	NA	NA	NA	NA	NA	NA	NA
Appendicular lean mass	450,243 European ancestry individuals	2q36.3	2	226395248	intergenic	NYAP2 - MIR5702	ENSG00000144460	ENSG00000263363		665361	263462	rs17246129	A	17246129	intergenic_variant	1	0.3044	1e-35	35	NA	0.0254	[0.021-0.029] unit increase	226395248	G	A	0.301849	0.99753183		A	G	4.26e-05	0.0234	0.000167	0.02414	0.104	0.02056	1	1
Appendicular lean mass	244,730 European ancestry women	2q36.3	2	226796287	IRS1	IRS1			ENSG00000169047	NA	NA	rs41265094	C	41265094	missense_variant	0	0.985	2e-14	13.699	NA	0.08	[0.06-0.1] unit decrease	226796287	C	G	0.0148108	0.99418307		G	C	0.429	0.0183	0.815	0.00578	0.105	0.10608	NA	NA
Appendicular lean mass	450,243 European ancestry individuals	2q36.3	2	226796287	IRS1	IRS1			ENSG00000169047	NA	NA	rs41265094	C	41265094	missense_variant	0	0.9853	1e-17	17	NA	0.0629	[0.049-0.077] unit decrease	226796287	C	G	0.0148108	0.99418307		G	C	0.429	0.0183	0.815	0.00578	0.105	0.10608	NA	NA
Appendicular lean mass	450,243 European ancestry individuals	2q37.1	2	231421841	intergenic	B3GNT7 - ZBTB8OSP2	ENSG00000156966	ENSG00000172799		20677	12082	rs4973392	A	4973392	intergenic_variant	1	0.2268	2e-20	19.699	NA	0.021	[0.016-0.026] unit decrease	231421841	G	A	0.225248	0.99929045		A	G	0.436	-0.0048	0.266	-0.00779	0.662	0.00577	NA	NA
Appendicular lean mass	450,243 European ancestry individuals	2q37.1	2	231463970	NCL	NCL			ENSG00000115053	NA	NA	rs10202701	T	10202701	5_prime_UTR_variant	0	0.5419	3e-33	32.5229	NA	0.0227	[0.019-0.026] unit increase	231463970	C	T	0.541447	0.99812438		T	C	0.000317	0.0186	0.000136	0.0225	0.59	0.00577	1	1
Appendicular lean mass	450,243 European ancestry individuals	2q37.1	2	231916474	intergenic	MIR1471 - NPPC	ENSG00000222246	ENSG00000163273		24176	5335	rs73000823	T	73000823	intergenic_variant	1	0.1563	2e-15	14.699	NA	0.0205	[0.015-0.026] unit decrease	231916474	C	T	0.155518	0.99949737		T	C	0.698	-0.0028	0.169	-0.01119	0.0686	0.02883	NA	NA
Appendicular lean mass	450,243 European ancestry individuals	2q37.1	2	232209495	DIS3L2	DIS3L2			ENSG00000144535	NA	NA	rs3116201	A	3116201	intron_variant	0	0.0977	3e-21	20.5229	NA	0.0299	[0.024-0.036] unit decrease	232209495	G	A	0.0970837	0.99868948		A	G	0.803	-0.0022	0.522	0.00629	0.0717	-0.03459	NA	NA
Appendicular lean mass	450,243 European ancestry individuals	2q37.1	2	232229023	DIS3L2	DIS3L2			ENSG00000144535	NA	NA	rs79057767	A	79057767	intron_variant	0	0.9677	3e-21	20.5229	NA	0.0498	[0.039-0.06] unit decrease	232229023	A	G	0.0330836	0.9977199		G	A	0.000295	-0.0593	0.000295	-0.05934	1	0	NA	1
Appendicular lean mass	450,243 European ancestry individuals	2q37.1	2	232229023	DIS3L2	DIS3L2			ENSG00000144535	NA	NA	rs79057767	A	79057767	intron_variant	0	0.9677	3e-21	20.5229	NA	0.0498	[0.039-0.06] unit decrease	232229023	A	T	0	nan		NA	NA	NA	NA	NA	NA	NA	NA	NA	NA
Appendicular lean mass	450,243 European ancestry individuals	2q37.1	2	232720589	GIGYF2	GIGYF2			ENSG00000204120	NA	NA	rs6755070	T	6755070	intron_variant	0	0.3501	2e-23	22.699	NA	0.0198	[0.016-0.024] unit decrease	232720589	G	T	0.333623	0.99684911		T	G	0.0381	-0.0113	0.0404	-0.01282	0.56	-0.00653	1	1
Appendicular lean mass	450,243 European ancestry individuals	2q37.1	2	233460841	DGKD	DGKD			ENSG00000077044	NA	NA	rs2971857	A	2971857	intron_variant	0	0.5752	4e-10	9.39794	NA	0.0119	[0.0082-0.0156] unit decrease	233460841	G	A	0.574004	0.99903211		!A	A	0.383	0.0045	0.277	0.00641	0.849	-0.00211	NA	NA
Appendicular lean mass	450,243 European ancestry individuals	2p24.1	2	23673179	KLHL29	KLHL29			ENSG00000119771	NA	NA	rs12713004	A	12713004	intron_variant	0	0.2746	2e-68	67.699	NA	0.0367	[0.033-0.041] unit decrease	23673179	A	G	0.726528	0.99896821		!G	G	0.0306	-0.0127	0.134	-0.00993	0.0739	-0.02229	NA	1
Appendicular lean mass	450,243 European ancestry individuals	2q37.3	2	237442704	intergenic	COL6A3 - MLPH	ENSG00000163359	ENSG00000115648		28376	42724	rs12476059	T	12476059	intergenic_variant	1	0.8495	5e-10	9.30103	NA	0.0173	[0.012-0.023] unit increase	237442704	T	C	0.153303	0.98077251		C	T	0.214	-0.0087	0.173	-0.01106	0.889	-0.00192	NA	NA
Appendicular lean mass	450,243 European ancestry individuals	2q37.3	2	240834598	intergenic	KIF1A - AGXT	ENSG00000130294	ENSG00000172482		10305	34226	rs61277584	A	61277584	intergenic_variant	1	0.4733	3e-13	12.5229	NA	0.0137	[0.01-0.0174] unit increase	240834598	A	G	0.525339	0.99935534		G	A	0.783	-0.0012	0.992	0	0.478	-0.00749	NA	NA
Appendicular lean mass	450,243 European ancestry individuals	2q37.3	2	241111325	PASK	PASK			ENSG00000115687	NA	NA	rs2310876	A	2310876	intron_variant	0	0.6693	3e-12	11.5229	NA	0.014	[0.01-0.018] unit increase	241111325	A	G	0.331383	0.99970279		G	A	0.013	-0.0134	0.0225	-0.01421	0.312	-0.01095	1	1
Appendicular lean mass	450,243 European ancestry individuals	2q37.3	2	241555977	BOK	BOK, BOK-AS1			ENSG00000176720, ENSG00000234235	NA	NA	rs6718026	T	6718026	intron_variant	0	0.5857	2e-19	18.699	NA	0.0171	[0.013-0.021] unit decrease	241555977	C	T	0.582913	0.99103508		!T	T	0.33	0.0051	0.0423	0.01207	0.0909	-0.01845	NA	NA
Appendicular lean mass	450,243 European ancestry individuals	2p23.3	2	24223173	ITSN2	ITSN2			ENSG00000198399	NA	NA	rs2543666	T	2543666	intron_variant	0	0.7072	1e-27	27	NA	0.0224	[0.018-0.027] unit increase	24223173	C	T	0.705378	0.99983635		!T	T	0.109	-0.009	0.288	-0.00679	0.161	-0.01653	NA	NA
Appendicular lean mass	450,243 European ancestry individuals	2p23.3	2	24830959	ADCY3	ADCY3			ENSG00000138031	NA	NA	rs1056074	T	1056074	intron_variant	0	0.8225	1e-11	11	NA	0.0163	[0.012-0.021] unit increase	24830959	T	C	0.178574	0.99919497		C	T	0.0502	-0.0134	0.073	-0.01383	0.425	-0.01172	NA	NA
Appendicular lean mass	450,243 European ancestry individuals	2p23.3	2	24968876	DNAJC27	DNAJC27			ENSG00000115137	NA	NA	rs2118826	A	2118826	intron_variant	0	0.4899	1e-39	39	NA	0.0247	[0.021-0.028] unit decrease	24968876	A	T	0.507484	0.99973422		!T	T	0.77	-0.0015	0.826	-0.00126	0.836	-0.00211	NA	NA
Appendicular lean mass	450,243 European ancestry individuals	2p23.3	2	25235231	DNMT3A	DNMT3A			ENSG00000119772	NA	NA	rs11689727	A	11689727	intron_variant	0	0.3317	2e-09	8.69897	NA	0.0117	[0.008-0.0154] unit decrease	25235231	C	A	0.332802	0.99936225		A	C	0.246	-0.0063	0.321	-0.00616	0.546	-0.00692	NA	NA
Appendicular lean mass	450,243 European ancestry individuals	2p23.3	2	25751644	ASXL2	ASXL2			ENSG00000143970	NA	NA	rs72799646	A	72799646	intron_variant	0	0.7718	1e-22	22	NA	0.0218	[0.017-0.026] unit decrease	25751644	A	G	0.230724	0.9999562		G	A	0.352	0.0057	0.0495	0.0137	0.111	-0.01979	NA	NA
Appendicular lean mass	205,513 European ancestry men	2p23.3	2	27508073	GCKR	GCKR			ENSG00000084734	NA	NA	rs1260326	T	1260326	missense_variant	0	0.396	5e-29	28.301	NA	0.03	[0.024-0.036] unit decrease	27508073	T	C	0.607631	0.99901403		!C	C	5.3e-05	-0.0214	0.00109	-0.01961	0.0138	-0.02748	NA	1
Appendicular lean mass	244,730 European ancestry women	2p23.3	2	27508073	GCKR	GCKR			ENSG00000084734	NA	NA	rs1260326	T	1260326	missense_variant	0	0.396	4e-37	36.3979	NA	0.03	[0.024-0.036] unit decrease	27508073	T	C	0.607631	0.99901403		!C	C	5.3e-05	-0.0214	0.00109	-0.01961	0.0138	-0.02748	NA	1
Appendicular lean mass	450,243 European ancestry individuals	2p23.3	2	27508073	GCKR	GCKR			ENSG00000084734	NA	NA	rs1260326	T	1260326	missense_variant	0	0.3955	6e-64	63.2218	NA	0.0323	[0.029-0.036] unit decrease	27508073	T	C	0.607631	0.99901403		!C	C	5.3e-05	-0.0214	0.00109	-0.01961	0.0138	-0.02748	NA	1
Appendicular lean mass	450,243 European ancestry individuals	2p22.3	2	33262184	LTBP1	LTBP1			ENSG00000049323	NA	NA	rs11678716	C	11678716	intron_variant	0	0.0681	4e-24	23.3979	NA	0.0377	[0.03-0.045] unit decrease	33262184	G	C	0.068381	0.9990847		C	G	0.243	-0.0091	0.0801	-0.02037	0.902	0.00269	NA	NA
Appendicular lean mass	450,243 European ancestry individuals	2p22.2	2	36875106	STRN	STRN			ENSG00000115808	NA	NA	rs17496249	A	17496249	intron_variant	0	0.5546	7e-11	10.1549	NA	0.0123	[0.0086-0.016] unit decrease	36875106	A	G	0.446826	0.99907654		G	A	0.00108	0.0169	0.0265	0.01307	0.00608	0.02921	1	1
Appendicular lean mass	450,243 European ancestry individuals	2p22.1	2	40192366	SLC8A1	SLC8A1-AS1, SLC8A1			ENSG00000227028, ENSG00000183023	NA	NA	rs5830612	T	5830612	intron_variant	0	0.8749	4e-11	10.3979	NA	0.0188	[0.013-0.024] unit decrease	40192366	T	G	0.12711	0.9995372		G	T	0.000881	0.0262	0.000865	0.02929	0.443	0.01364	1	1
Appendicular lean mass	450,243 European ancestry individuals	2p22.1	2	41461301	intergenic	HNRNPA1P57 - LDHAP3	ENSG00000237442	ENSG00000236090		303746	358446	rs3035165	T	3035165	intergenic_variant	1	0.4722	7e-14	13.1549	NA	0.0144	[0.011-0.018] unit increase	41461300	T	TTA	0.409532	0.99561153		TTA	T	0.923	-2e-04	0.833	-0.00126	0.944	0.00077	NA	NA
Appendicular lean mass	450,243 European ancestry individuals	2p22.1	2	41461301	intergenic	HNRNPA1P57 - LDHAP3	ENSG00000237442	ENSG00000236090		303746	358446	rs3035165	T	3035165	intergenic_variant	1	0.4722	7e-14	13.1549	NA	0.0144	[0.011-0.018] unit increase	41461300	TA	TTAAA	0.0615108	0.99701657		TTAAA	TA	0.972	-4e-04	0.811	-0.00289	0.74	0.00673	NA	NA
Appendicular lean mass	450,243 European ancestry individuals	2p22.1	2	41461301	intergenic	HNRNPA1P57 - LDHAP3	ENSG00000237442	ENSG00000236090		303746	358446	rs3035165	T	3035165	intergenic_variant	1	0.4722	7e-14	13.1549	NA	0.0144	[0.011-0.018] unit increase	41461300	TA	TTTAA	0.0779682	0.99518506		TTTAA	TA	0.926	-9e-04	0.616	0.00553	0.277	-0.02133	NA	NA
Appendicular lean mass	450,243 European ancestry individuals	2p22.1	2	41461301	intergenic	HNRNPA1P57 - LDHAP3	ENSG00000237442	ENSG00000236090		303746	358446	rs3035165	T	3035165	intergenic_variant	1	0.4722	7e-14	13.1549	NA	0.0144	[0.011-0.018] unit increase	41461300	TA	TTTAAA	0.000213789	0.85756061		TTTAAA	TA	0.781	0.0571	0.781	0.05707	NA	NA	NA	NA
Appendicular lean mass	450,243 European ancestry individuals	2p25.3	2	417167	AC105393.1	LINC01865 - LINC01874	ENSG00000233684	ENSG00000223985		75049	73777	rs62106258	T	62106258	intergenic_variant	1	0.9514	4e-33	32.3979	NA	0.0511	[0.043-0.06] unit increase	417167	T	C	0.0483126	0.99370291		C	T	0.0015	-0.038	0.00226	-0.04149	0.308	-0.02594	1	1
Appendicular lean mass	450,243 European ancestry individuals	2p21	2	42348680	COX7A2L	COX7A2L			ENSG00000115944	NA	NA	rs10202845	A	10202845	intron_variant	0	0.8867	5e-22	21.301	NA	0.0288	[0.023-0.035] unit increase	42348680	A	G	0.113161	0.99705341		G	A	0.0364	-0.0169	0.0636	-0.0171	0.333	-0.01633	1	1
Appendicular lean mass	450,243 European ancestry individuals	2p21	2	44166393	AC013717.1	PDSS1P2			ENSG00000224637	NA	NA	rs7593987	A	7593987	non_coding_transcript_exon_variant	0	0.1914	1e-19	19	NA	0.0217	[0.017-0.026] unit increase	44166393	A	G	0.808353	0.99867532		!G	G	1	0	0.511	0.0049	0.259	-0.01461	NA	NA
Appendicular lean mass	450,243 European ancestry individuals	2p21	2	44667003	CAMKMT	CAMKMT			ENSG00000143919	NA	NA	rs11893991	A	11893991	intron_variant	0	0.4266	2e-09	8.69897	NA	0.0116	[0.0079-0.0153] unit increase	44667003	A	G	0.572903	0.99257889		!G	G	0.219	0.0063	0.0533	0.01144	0.346	-0.00999	NA	NA
Appendicular lean mass	450,243 European ancestry individuals	2p21	2	45651621	PRKCE	PRKCE			ENSG00000171132	NA	NA	rs687914	T	687914	5_prime_UTR_variant	0	0.2514	8e-11	10.0969	NA	0.0141	[0.0098-0.0184] unit decrease	45651621	G	T	0.251443	0.99822956		T	G	0.432	0.0049	0.845	-0.00138	0.0495	0.02498	NA	NA
Appendicular lean mass	450,243 European ancestry individuals	2p21	2	46682670	intergenic	CRIPT - LINC01118	ENSG00000119878	ENSG00000222005		52494	16270	rs62136933	A	62136933	regulatory_region_variant	1	0.1842	9e-32	31.0458	NA	0.0285	[0.024-0.033] unit increase	46682670	G	A	0.183759	0.99687352		A	G	0.0865	0.0113	0.21	0.00943	0.2	0.01768	NA	NA
Appendicular lean mass	450,243 European ancestry individuals	2p21	2	47056418	TTC7A	STPG4, TTC7A			ENSG00000239605, ENSG00000068724	NA	NA	rs2436772	A	2436772	intron_variant	0	0.2092	1e-15	15	NA	0.019	[0.014-0.024] unit increase	47056418	G	A	0.209382	0.99892342		A	G	0.0944	0.0105	0.128	0.01094	0.479	0.00922	NA	NA
Appendicular lean mass	450,243 European ancestry individuals	2p16.3	2	47835644	FBXO11	FBXO11			ENSG00000138081	NA	NA	rs1875407	T	1875407	intron_variant	0	0.3812	8e-13	12.0969	NA	0.0139	[0.01-0.018] unit decrease	47835644	T	C	0.618804	0.99839174		!C	C	0.0552	-0.0101	0.0517	-0.01169	0.667	-0.0048	NA	NA
Appendicular lean mass	450,243 European ancestry individuals	2p16.3	2	48346756	FOXN2	FOXN2			ENSG00000170802	NA	NA	rs79073127	C	79073127	splice_donor_5th_base_variant	0	0.1227	3e-15	14.5229	NA	0.0226	[0.017-0.028] unit decrease	48346756	G	C	0.122983	0.99917202		C	G	0.253	-0.0092	0.433	-0.00704	0.318	-0.01826	NA	NA
Appendicular lean mass	450,243 European ancestry individuals	2p16.1	2	55879793	EFEMP1	EFEMP1			ENSG00000115380	NA	NA	rs59985551	T	59985551	intron_variant	0	0.2261	2e-44	43.699	NA	0.0313	[0.027-0.036] unit decrease	55879793	C	T	0.224014	0.99959451		T	C	1.2e-06	0.0303	1.05e-05	0.03093	0.0404	0.02787	NA	1
Appendicular lean mass	450,243 European ancestry individuals	2p16.1	2	55962483	AC011306.1	RN7SKP208 - MIR217HG	ENSG00000202344	ENSG00000226702		10469	708	rs1432559	T	1432559	intron_variant	1	0.7814	2e-09	8.69897	NA	0.013	[0.0089-0.0171] unit decrease	55962483	T	A	1.60927e-06	0.79299533		NA	NA	NA	NA	NA	NA	NA	NA	NA	NA
Appendicular lean mass	450,243 European ancestry individuals	2p16.1	2	55962483	AC011306.1	RN7SKP208 - MIR217HG	ENSG00000202344	ENSG00000226702		10469	708	rs1432559	T	1432559	intron_variant	1	0.7814	2e-09	8.69897	NA	0.013	[0.0089-0.0171] unit decrease	55962483	T	G	0.217625	0.99853183		G	T	0.634	-0.003	0.89	-0.00101	0.46	-0.0098	NA	NA
Appendicular lean mass	450,243 European ancestry individuals	2p16.1	2	60066081	AC007132.1	RNA5SP94 - MIR4432HG	ENSG00000252726	ENSG00000228590		371212	270365	rs75022676	A	75022676	intron_variant	1	0.2079	3e-12	11.5229	NA	0.0163	[0.012-0.021] unit decrease	60066081	G	A	0.208573	0.98175305		A	G	0.262	-0.0073	0.286	-0.00779	0.705	-0.00538	NA	NA
Appendicular lean mass	450,243 European ancestry individuals	2p25.3	2	620297	intergenic	LINC01875 - TMEM18	ENSG00000225942	ENSG00000151353		73630	43580	rs7563362	A	7563362	intergenic_variant	1	0.1434	3e-39	38.5229	NA	0.0352	[0.03-0.04] unit decrease	620297	A	G	0.859374	0.99755597		!G	G	4.92e-06	-0.0341	1.79e-05	-0.03595	0.101	-0.0271	NA	1
Appendicular lean mass	450,243 European ancestry individuals	2p14	2	65429835	SPRED2	SPRED2			ENSG00000198369	NA	NA	rs7569084	T	7569084	intron_variant	0	0.5853	9e-16	15.0458	NA	0.0153	[0.012-0.019] unit decrease	65429835	C	T	0.586033	0.99902062		!T	T	0.191	0.0068	0.269	0.00654	0.484	0.00749	NA	NA
Appendicular lean mass	450,243 European ancestry individuals	2p14	2	68127804	WDR92	DNAAF10			ENSG00000243667	NA	NA	rs76517946	A	76517946	intron_variant	0	0.0814	2e-26	25.699	NA	0.0368	[0.03-0.044] unit decrease	68127804	C	A	0.081278	0.9982802		A	C	0.796	0.0025	0.863	0.00189	0.814	0.00519	NA	NA
Appendicular lean mass	450,243 European ancestry individuals	2p13.3	2	69150938	ANTXR1	ANTXR1			ENSG00000169604	NA	NA	rs6711815	C	6711815	intron_variant	0	0.1474	3e-09	8.52288	NA	0.016	[0.011-0.021] unit increase	69150938	G	C	0.147821	0.99316861		C	G	0.214	0.0074	0.0826	0.01446	0.975	-0.00058	NA	NA
Appendicular lean mass	450,243 European ancestry individuals	2p13.3	2	70088855	PCBP1	PCBP1-AS1, PCBP1			ENSG00000179818, ENSG00000169564	NA	NA	rs11545482	T	11545482	3_prime_UTR_variant	0	0.0205	4e-11	10.3979	NA	0.0437	[0.031-0.057] unit decrease	70088855	C	T	0.020842	0.99297636		T	C	0.124	-0.0279	0.182	-0.02753	0.444	-0.02902	NA	NA
Appendicular lean mass	450,243 European ancestry individuals	2p13.2	2	71451390	DYSF	ZNF638 - DYSF	ENSG00000075292	ENSG00000135636		16321	2171	rs4852257	T	4852257	intergenic_variant	1	0.4237	6e-34	33.2218	NA	0.0231	[0.019-0.027] unit increase	71451390	T	G	0.576064	0.99800505		!G	G	0.203	0.0055	0.0801	0.01031	0.949	0.00077	NA	NA
Appendicular lean mass	450,243 European ancestry individuals	2p13.2	2	71726556	intergenic	DYSF - RPS20P10	ENSG00000135636	ENSG00000233971		39793	257626	rs6749644	T	6749644	intergenic_variant	1	0.6871	6e-13	12.2218	NA	0.0141	[0.01-0.018] unit decrease	71726556	G	T	0.684561	0.99615302		!T	T	0.191	0.0072	0.00675	0.0171	0.0284	-0.02498	NA	NA
Appendicular lean mass	450,243 European ancestry individuals	2p13.2	2	72213648	EXOC6B	EXOC6B			ENSG00000144036	NA	NA	rs13423761	A	13423761	intron_variant	0	0.327	6e-10	9.22185	NA	0.0124	[0.0085-0.0163] unit increase	72213648	C	A	0.329794	0.99991027		A	C	0.000132	0.0208	0.00508	0.01735	0.0045	0.03209	1	1
Appendicular lean mass	450,243 European ancestry individuals	2p13.1	2	74454375	INO80B	RTKN - INO80B	ENSG00000114993	ENSG00000115274		11953	712	rs6746854	T	6746854	regulatory_region_variant	1	0.8497	7e-10	9.1549	NA	0.0162	[0.011-0.021] unit decrease	74454375	T	C	0.150006	0.99946008		C	T	0.0377	0.0151	0.0315	0.01773	0.696	0.00596	1	1
Appendicular lean mass	450,243 European ancestry individuals	2p11.2	2	85591763	VAMP5	VAMP5			ENSG00000168899	NA	NA	rs14976	T	14976	synonymous_variant	0	0.3057	1e-12	12	NA	0.0144	[0.01-0.018] unit increase	85591763	C	T	0.308418	0.99892144		T	C	0.314	-0.0056	0.0122	-0.01584	0.00852	0.0319	NA	NA
Appendicular lean mass	205,513 European ancestry men	2p11.2	2	88613755	EIF2AK3	EIF2AK3			ENSG00000172071	NA	NA	rs867529	C	867529	missense_variant	0	0.28	2e-07	6.69897	NA	0.01	[0.0041-0.0159] unit increase	88613755	G	C	0.280763	0.99985652		C	G	0.253	-0.0066	0.356	-0.00603	0.486	-0.00846	NA	NA
Appendicular lean mass	244,730 European ancestry women	2p11.2	2	88613755	EIF2AK3	EIF2AK3			ENSG00000172071	NA	NA	rs867529	C	867529	missense_variant	0	0.28	2e-14	13.699	NA	0.02	[0.014-0.026] unit increase	88613755	G	C	0.280763	0.99985652		C	G	0.253	-0.0066	0.356	-0.00603	0.486	-0.00846	NA	NA
Appendicular lean mass	450,243 European ancestry individuals	2p11.2	2	88613755	EIF2AK3	EIF2AK3			ENSG00000172071	NA	NA	rs867529	C	867529	missense_variant	0	0.2796	1e-18	18	NA	0.0184	[0.014-0.023] unit increase	88613755	G	C	0.280763	0.99985652		C	G	0.253	-0.0066	0.356	-0.00603	0.486	-0.00846	NA	NA
Appendicular lean mass	450,243 European ancestry individuals	2p25.1	2	9556938	ADAM17	ADAM17 - YWHAQ	ENSG00000151694	ENSG00000134308		206	27029	rs12474969	A	12474969	regulatory_region_variant	1	0.3006	4e-16	15.3979	NA	0.0167	[0.013-0.021] unit increase	9556938	G	A	0.300083	0.99793914		A	G	0.151	0.0081	0.22	0.00792	0.452	0.00884	NA	NA
Appendicular lean mass	450,243 European ancestry individuals	2p25.1	2	9637100	AC082651.1	YWHAQ - RNU4-73P	ENSG00000134308	ENSG00000200034		6103	103543	rs4668626	A	4668626	regulatory_region_variant	1	0.5839	2e-10	9.69897	NA	0.0113	[0.0078-0.0148] unit decrease	9637100	A	G	0.41565	0.99873553		G	A	0.021	0.0119	0.0209	0.0137	0.548	0.00634	1	1
Appendicular lean mass	450,243 European ancestry individuals	20p12.2	20	10643542	JAG1	JAG1			ENSG00000101384	NA	NA	rs889509	A	889509	intron_variant	0	0.5827	2e-12	11.699	NA	0.0136	[0.0099-0.0173] unit increase	10643542	A	G	0.416516	0.99712414		G	A	0.0539	-0.01	0.277	-0.00641	0.0429	-0.02172	NA	NA
Appendicular lean mass	450,243 European ancestry individuals	20p11.23	20	20089182	CFAP61	CFAP61			ENSG00000089101	NA	NA	rs73125634	T	73125634	intron_variant	0	0.2782	5e-20	19.301	NA	0.0195	[0.015-0.024] unit decrease	20089182	G	T	0.277823	0.99780311		T	G	0.00132	-0.0185	0.000571	-0.0225	0.703	-0.00461	1	1
Appendicular lean mass	450,243 European ancestry individuals	20p11.23	20	20358965	CFAP61	CFAP61			ENSG00000089101	NA	NA	rs76657242	T	76657242	intron_variant	0	0.0627	5e-12	11.301	NA	0.0295	[0.021-0.038] unit decrease	20358965	C	T	0.0658884	0.98656639		T	C	0.903	0.0013	0.389	0.01031	0.167	-0.03152	NA	NA
Appendicular lean mass	450,243 European ancestry individuals	20p11.23	20	21237338	KIZ	KIZ			ENSG00000088970	NA	NA	rs6082354	A	6082354	intron_variant	0	0.3325	1e-32	32	NA	0.024	[0.02-0.028] unit increase	21237338	A	C	0.666094	0.99811443		!C	C	0.000644	0.0185	0.012	0.01559	0.0121	0.02806	NA	1
Appendicular lean mass	450,243 European ancestry individuals	20q11.21	20	31973357	XKR7	XKR7			ENSG00000260903	NA	NA	rs74397018	A	74397018	intron_variant	0	0.0431	1e-11	11	NA	0.0321	[0.023-0.041] unit decrease	31973357	G	A	0.0426946	0.99635625		A	G	0.602	-0.0067	0.251	-0.01647	0.261	0.03209	NA	NA
Appendicular lean mass	450,243 European ancestry individuals	20q11.21	20	32767161	DNMT3B	DNMT3B			ENSG00000088305	NA	NA	rs780552580	C	780552580	intron_variant	0	0.0016	2e-22	21.699	NA	0.2777	[0.22-0.33] unit decrease	32767161	G	C	0.00241913	0.99055837		C	G	0.0112	-0.148	0.0141	-0.14482	0.461	-0.29672	1	1
Appendicular lean mass	450,243 European ancestry individuals	20q11.21	20	32795547	DNMT3B	DNMT3B			ENSG00000088305	NA	NA	rs910085	T	910085	intron_variant	0	0.6128	3e-19	18.5229	NA	0.0163	[0.013-0.02] unit increase	32795547	T	G	0.387633	0.99989029		G	T	0.215	-0.0065	0.346	-0.00566	0.389	-0.00942	NA	NA
Appendicular lean mass	450,243 European ancestry individuals	20p13	20	3285673	C20orf194	DNAAF9			ENSG00000088854	NA	NA	rs2236096	T	2236096	intron_variant	0	0.7673	1e-15	15	NA	0.018	[0.013-0.023] unit decrease	3285673	T	C	0.236831	0.99996144		C	T	0.215	-0.0076	0.575	-0.0039	0.114	-0.02056	NA	NA
Appendicular lean mass	450,243 European ancestry individuals	20q11.22	20	33712828	PXMP4	PXMP4			ENSG00000101417	NA	NA	rs34879158	A	34879158	intron_variant	0	0.737	2e-63	62.699	NA	0.0363	[0.032-0.041] unit increase	33712828	A	C	0.264661	0.99939774		C	A	0.0673	-0.0107	0.021	-0.01521	0.622	0.00634	NA	NA
Appendicular lean mass	450,243 European ancestry individuals	20q11.22	20	35277785	MMP24	MMP24OS			ENSG00000126005	NA	NA	rs6060343	C	6060343	stop_gained	0	0.1271	6e-32	31.2218	NA	0.0383	[0.032-0.045] unit increase	35277785	G	C	0.000176526	0.92636918		C	G	0.75	-0.0705	0.75	-0.07053	NA	NA	NA	NA
Appendicular lean mass	450,243 European ancestry individuals	20q11.22	20	35437976	GDF5	GDF5			ENSG00000125965	NA	NA	rs143384	A	143384	5_prime_UTR_variant	0	0.5962	0	318.155	NA	0.0725	[0.069-0.076] unit decrease	35437976	G	A	0.598663	0.99929607		!A	A	5.77e-08	0.0283	1.77e-08	0.03331	0.33	0.01076	1	1
Appendicular lean mass	450,243 European ancestry individuals	20q11.23	20	35975462	CNBD2	CNBD2			ENSG00000149646	NA	NA	rs55783707	A	55783707	intron_variant	0	0.1099	8e-22	21.0969	NA	0.0308	[0.025-0.037] unit increase	35975462	G	A	0.127892	0.93892802		A	G	1.63e-05	0.0353	3.95e-05	0.03784	0.151	0.02556	1	1
Appendicular lean mass	450,243 European ancestry individuals	20q11.23	20	36608799	TGIF2-RAB5IF	TGIF2-RAB5IF, RAB5IF			ENSG00000259399, ENSG00000101084	NA	NA	rs150260898	A	150260898	intron_variant	0	0.9286	1e-25	25	NA	0.0391	[0.032-0.046] unit increase	36608799	A	G	0.0756569	0.99786652		G	A	2.5e-05	-0.0426	7.1e-05	-0.04387	0.151	-0.03613	1	1
Appendicular lean mass	450,243 European ancestry individuals	20q11.23	20	37244244	RPN2	RPN2 - GHRH	ENSG00000118705	ENSG00000118702		2625	6842	rs1001352	T	1001352	regulatory_region_variant	1	0.8165	2e-21	20.699	NA	0.0221	[0.018-0.027] unit increase	37244244	C	T	0.815224	0.99779881		!T	T	0.751	-0.0021	0.198	-0.00968	0.101	0.02191	NA	NA
Appendicular lean mass	450,243 European ancestry individuals	20q11.23	20	37294597	MANBAL	MANBAL			ENSG00000101363	NA	NA	rs372043631	C	372043631	intron_variant	0	0.9967	2e-38	37.699	NA	0.2869	[0.24-0.33] unit increase	37294597	C	G	0.00321536	0.90577414		G	C	0.0193	-0.1267	0.016	-0.13087	0.502	0.41279	1	1
Appendicular lean mass	450,243 European ancestry individuals	20q11.23	20	37294597	MANBAL	MANBAL			ENSG00000101363	NA	NA	rs372043631	C	372043631	intron_variant	0	0.9967	2e-38	37.699	NA	0.2869	[0.24-0.33] unit increase	37294597	C	T	0	nan		NA	NA	NA	NA	NA	NA	NA	NA	NA	NA
Appendicular lean mass	450,243 European ancestry individuals	20q12	20	39254461	intergenic	LINC01734 - ATG3P1	ENSG00000230324	ENSG00000224357		29713	74553	rs11484119	G	11484119	intergenic_variant	1	0.9253	1e-12	12	NA	0.026	[0.019-0.033] unit increase	39254460	GA	G	0	nan		NA	NA	NA	NA	NA	NA	NA	NA	NA	NA
Appendicular lean mass	450,243 European ancestry individuals	20q12	20	39923436	intergenic	RN7SL680P - HSPE1P1	ENSG00000275337	ENSG00000234878		574044	9486	rs2224538	T	2224538	intergenic_variant	1	0.6362	6e-25	24.2218	NA	0.0204	[0.016-0.024] unit increase	39923436	T	C	0.363378	0.99938702		C	T	0.0247	-0.012	0.021	-0.01408	0.634	-0.00519	1	1
Appendicular lean mass	450,243 European ancestry individuals	20p13	20	4121153	SMOX	SMOX			ENSG00000088826	NA	NA	rs1741344	T	1741344	non_coding_transcript_exon_variant	0	0.6345	5e-12	11.301	NA	0.0136	[0.0097-0.0175] unit decrease	4121153	C	T	0.633965	0.99677843		!T	T	0.61	0.0027	0.5	0.00402	0.862	-0.00192	NA	NA
Appendicular lean mass	450,243 European ancestry individuals	20q12	20	41551270	CHD6	CHD6			ENSG00000124177	NA	NA	rs6129863	A	6129863	intron_variant	0	0.2223	3e-12	11.5229	NA	0.0159	[0.011-0.02] unit decrease	41551270	G	A	0.221376	0.99984662		A	G	0.139	-0.0092	0.149	-0.01018	0.657	-0.00577	NA	NA
Appendicular lean mass	450,243 European ancestry individuals	20q13.12	20	44125600	JPH2	JPH2			ENSG00000149596	NA	NA	rs7268343	A	7268343	intron_variant	0	0.1223	1e-09	9	NA	0.0176	[0.012-0.023] unit increase	44125600	G	A	0.121846	0.99853993		A	G	0.00211	0.024	0.013	0.02213	0.062	0.03017	1	1
Appendicular lean mass	450,243 European ancestry individuals	20q13.13	20	50572631	PTPN1	PTPN1			ENSG00000196396	NA	NA	rs6063534	T	6063534	non_coding_transcript_exon_variant	0	0.5187	2e-19	18.699	NA	0.0172	[0.013-0.021] unit decrease	50572631	C	T	0.518796	0.99980515		!T	T	0.029	0.0112	0.248	0.00679	0.0154	0.02575	1	1
Appendicular lean mass	450,243 European ancestry individuals	20q13.2	20	56283978	intergenic	MC3R - FAM210B	ENSG00000124089	ENSG00000124098		34163	74996	rs2182356	T	2182356	intergenic_variant	1	0.7327	6e-21	20.2218	NA	0.0201	[0.016-0.024] unit decrease	56283978	G	T	0.733358	0.99934125		!T	T	0.221	0.0071	0.102	0.01081	0.675	-0.005	NA	NA
Appendicular lean mass	450,243 European ancestry individuals	20q13.32	20	58361815	RAB22A	RAB22A			ENSG00000124209	NA	NA	rs6026214	A	6026214	3_prime_UTR_variant	0	0.4261	1e-14	14	NA	0.0148	[0.011-0.019] unit increase	58361815	C	A	0.425978	0.99290367		A	C	0.287	0.0055	0.335	0.00566	0.65	0.0048	NA	NA
Appendicular lean mass	450,243 European ancestry individuals	20q13.32	20	58888417	GNAS	GNAS			ENSG00000087460	NA	NA	rs6026578	C	6026578	5_prime_UTR_variant	0	0.375	3e-14	13.5229	NA	0.015	[0.011-0.019] unit increase	58888417	C	G	0.6234	0.99670174		!G	G	0.0299	-0.0115	0.159	-0.00855	0.0543	-0.02075	NA	1
Appendicular lean mass	450,243 European ancestry individuals	20q13.33	20	62933549	GID8	DIDO1			ENSG00000101191	NA	NA	rs73619441	T	73619441	intron_variant	0	0.8563	3e-09	8.52288	NA	0.0161	[0.011-0.021] unit increase	62933549	T	C	1.21738e-05	0.96243526		C	T	0.191	-1.2872	0.191	-1.28718	NA	NA	NA	NA
Appendicular lean mass	450,243 European ancestry individuals	20q13.33	20	62933549	GID8	DIDO1			ENSG00000101191	NA	NA	rs73619441	T	73619441	intron_variant	0	0.8563	3e-09	8.52288	NA	0.0161	[0.011-0.021] unit increase	62933549	T	G	0.139991	0.99779975		G	T	0.29	0.008	0.135	0.0127	0.569	-0.00922	NA	NA
Appendicular lean mass	450,243 European ancestry individuals	20p12.3	20	6611447	intergenic	CASC20 - LINC01713	ENSG00000229876	ENSG00000228482		82988	119633	rs6054390	A	6054390	intergenic_variant	1	0.628	1e-21	21	NA	0.0188	[0.015-0.023] unit decrease	6611447	G	A	0.628611	0.9983871		!A	A	0.674	0.0022	0.781	0.00163	0.711	0.00404	NA	NA
Appendicular lean mass	450,243 European ancestry individuals	20p12.3	20	6729191	LINC01713	CASC20 - LINC01713	ENSG00000229876	ENSG00000228482		200732	1889	rs2650965	A	2650965	intergenic_variant	1	0.6707	6e-14	13.2218	NA	0.0149	[0.011-0.019] unit increase	6729191	A	G	0.327005	0.99490412		G	A	0.127	0.0083	0.0224	0.01421	0.324	-0.01115	NA	NA
Appendicular lean mass	450,243 European ancestry individuals	20p12.3	20	6954250	intergenic	BMP2 - LINC01428	ENSG00000125845	ENSG00000228888		174004	192217	rs4815952	T	4815952	intergenic_variant	1	0.4779	2e-17	16.699	NA	0.0164	[0.013-0.02] unit increase	6954250	T	C	0.521911	0.99007561		!C	C	0.554	0.003	0.846	0.00113	0.382	0.00922	NA	NA
Appendicular lean mass	450,243 European ancestry individuals	20p12.3	20	7262893	AL080248.1	LINC01428 - LINC01751	ENSG00000228888	ENSG00000261249		8691	39163	rs6117726	T	6117726	intergenic_variant	1	0.5064	7e-14	13.1549	NA	0.0143	[0.011-0.018] unit decrease	7262893	T	C	0.497375	0.99597077		!C	C	0.367	0.0046	0.256	0.00666	0.855	-0.00192	NA	NA
Appendicular lean mass	450,243 European ancestry individuals	21q21.1	21	15177150	intergenic	LINC02920 - CYCSP42	ENSG00000236471	ENSG00000224524		109313	313380	rs35631698	G	35631698	intergenic_variant	1	0.6254	3e-13	12.5229	NA	0.0145	[0.011-0.018] unit decrease	15177149	G	GC	0.374035	0.99759699		GC	G	0.000218	0.0196	0.0178	0.01433	0.000761	0.03709	1	1
Appendicular lean mass	450,243 European ancestry individuals	21q21.1	21	16742153	intergenic	RNU1-98P - NEK4P1	ENSG00000239023	ENSG00000225735		22996	468316	rs4818280	T	4818280	regulatory_region_variant	1	0.6269	3e-10	9.52288	NA	0.0124	[0.0085-0.0163] unit decrease	16742153	C	T	0.628445	0.99838435		!T	T	0.00738	0.0141	0.0149	0.01458	0.258	0.0123	1	1
Appendicular lean mass	450,243 European ancestry individuals	21q22.12	21	35397822	RUNX1	RUNX1			ENSG00000159216	NA	NA	rs73197345	A	73197345	intron_variant	0	0.1367	4e-14	13.3979	NA	0.0211	[0.016-0.027] unit increase	35397822	T	A	0.137875	0.99898134		A	T	0.404	0.0063	0.458	0.00629	0.702	0.00653	NA	NA
Appendicular lean mass	450,243 European ancestry individuals	21q22.13	21	36694583	SIM2	CLDN14 - SIM2	ENSG00000159261	ENSG00000159263		118014	4532	rs2212926	A	2212926	intergenic_variant	1	0.2106	8e-21	20.0969	NA	0.022	[0.017-0.027] unit decrease	36694583	C	A	0.209487	0.99596403		A	C	0.00107	-0.0211	0.0248	-0.01622	0.00513	-0.03959	1	1
Appendicular lean mass	450,243 European ancestry individuals	21q22.2	21	38302059	KCNJ15	KCNJ15			ENSG00000157551	NA	NA	rs2298333	T	2298333	3_prime_UTR_variant	0	0.5677	1e-43	43	NA	0.0267	[0.023-0.03] unit decrease	38302059	C	T	0.564707	0.99822597		!T	T	0.0165	0.0123	0.0147	0.01433	0.585	0.00577	1	1
Appendicular lean mass	450,243 European ancestry individuals	21q22.2	21	38611524	ERG	ERG			ENSG00000157554	NA	NA	rs117870289	T	117870289	intron_variant	0	0.0149	1e-16	16	NA	0.0639	[0.049-0.079] unit decrease	38611524	C	T	0.0151073	0.99060951		T	C	0.0024	-0.0631	0.036	-0.05054	0.0154	-0.09935	1	1
Appendicular lean mass	450,243 European ancestry individuals	21q22.3	21	46115622	COL6A2	COL6A2			ENSG00000142173	NA	NA	rs8133910	T	8133910	intron_variant	0	0.256	3e-22	21.5229	NA	0.0212	[0.017-0.026] unit increase	46115622	T	G	0.744549	0.9993529		!G	G	0.167	0.008	0.557	0.0039	0.0708	0.02191	NA	NA
Appendicular lean mass	450,243 European ancestry individuals	22q11.21	22	19971146	ARVCF	ARVCF			ENSG00000099889	NA	NA	rs165849	A	165849	intron_variant	0	0.6975	5e-14	13.301	NA	0.0157	[0.012-0.02] unit increase	19971146	G	A	0.69987	0.99865987		!A	A	0.115	-0.0089	0.194	-0.0083	0.363	-0.01076	NA	NA
Appendicular lean mass	450,243 European ancestry individuals	22q11.21	22	20420745	SCARF2	RNU6-225P - SCARF2	ENSG00000207343	ENSG00000244486		3846	3839	rs361638	T	361638	regulatory_region_variant	1	0.8028	5e-19	18.301	NA	0.0216	[0.017-0.026] unit increase	20420744	T	TGTA	0.198849	0.99736608		TGTA	T	0.172	-0.0087	0.441	-0.00566	0.161	-0.01806	NA	NA
Appendicular lean mass	450,243 European ancestry individuals	22q12.1	22	27658325	intergenic	LINC02554 - CPMER	ENSG00000226741	ENSG00000227838		339824	18234	rs134040	A	134040	intergenic_variant	1	0.5235	3e-09	8.52288	NA	0.0114	[0.0077-0.0151] unit increase	27658325	A	G	0.476421	0.99777863		G	A	0.892	-7e-04	0.457	-0.0044	0.284	0.01153	NA	NA
Appendicular lean mass	450,243 European ancestry individuals	22q12.2	22	30153082	HORMAD2	HORMAD2			ENSG00000176635	NA	NA	rs5763821	A	5763821	intron_variant	0	0.6093	1e-21	21	NA	0.0191	[0.015-0.023] unit decrease	30153082	A	C	0.360184	0.99964249		C	A	5.7e-05	0.0214	0.00137	0.01936	0.0112	0.02825	1	1
Appendicular lean mass	450,243 European ancestry individuals	22q12.2	22	30153082	HORMAD2	HORMAD2			ENSG00000176635	NA	NA	rs5763821	A	5763821	intron_variant	0	0.6093	1e-21	21	NA	0.0191	[0.015-0.023] unit decrease	30153082	A	T	2.53848e-05	0.85045813		T	A	0.758	-0.3054	0.758	-0.30536	NA	NA	NA	NA
Appendicular lean mass	450,243 European ancestry individuals	22q12.2	22	31145226	PLA2G3	PLA2G3 - MIR3928	ENSG00000100078	ENSG00000264141		4718	14836	rs56195223	T	56195223	intergenic_variant	1	0.8895	4e-16	15.3979	NA	0.0247	[0.019-0.031] unit decrease	31145226	T	C	0.109804	0.99979079		C	T	0.000822	0.0271	0.00305	0.02778	0.119	0.02517	1	1
Appendicular lean mass	450,243 European ancestry individuals	22q13.1	22	37721936	Z83844.1	TRIOBP			ENSG00000100106	NA	NA	rs5750482	T	5750482	intron_variant	0	0.371	5e-12	11.301	NA	0.0137	[0.0098-0.0176] unit decrease	37721936	T	C	0.632442	0.99952598		!C	C	0.972	2e-04	0.831	-0.00126	0.626	0.00557	NA	NA
Appendicular lean mass	450,243 European ancestry individuals	22q13.1	22	38143413	PLA2G6	PLA2G6			ENSG00000184381	NA	NA	rs11570645	A	11570645	5_prime_UTR_variant	0	0.9424	1e-11	11	NA	0.0276	[0.02-0.036] unit increase	38143413	A	G	0.0575598	0.99922711		G	A	0.0312	-0.0239	0.342	-0.01182	0.00385	-0.07091	1	1
Appendicular lean mass	450,243 European ancestry individuals	22q13.1	22	39464125	MGAT3	MGAT3			ENSG00000128268	NA	NA	rs2008174	T	2008174	intron_variant	0	0.7408	4e-14	13.3979	NA	0.0168	[0.012-0.021] unit increase	39464125	C	T	0.7417	0.9897787		!T	T	0.426	0.0047	0.67	-0.00289	0.0155	0.02979	NA	NA
Appendicular lean mass	450,243 European ancestry individuals	22q13.2	22	41457924	PHF5A	ACO2			ENSG00000100412	NA	NA	rs202637	A	202637	intron_variant	0	0.1835	1e-15	15	NA	0.0197	[0.015-0.025] unit decrease	41457924	A	G	0.818135	0.99898979		!G	G	0.000167	-0.0258	0.0012	-0.02464	0.051	-0.03075	NA	1
Appendicular lean mass	450,243 European ancestry individuals	22q13.2	22	41674370	SNU13	SNU13			ENSG00000100138	NA	NA	rs41311445	A	41311445	3_prime_UTR_variant	0	0.9042	5e-24	23.301	NA	0.0328	[0.027-0.039] unit increase	41674370	A	C	0.0955527	0.9996854		C	A	0.0608	-0.013	0.00786	-0.02627	0.941	-0.00135	NA	NA
Appendicular lean mass	450,243 European ancestry individuals	22q13.2	22	43257619	SCUBE1	SCUBE1			ENSG00000159307	NA	NA	rs139030	A	139030	intron_variant	0	0.7773	3e-11	10.5229	NA	0.0153	[0.011-0.02] unit decrease	43257619	A	G	0.225119	0.99886303		G	A	0.544	0.0037	0.379	0.00616	0.761	-0.00365	NA	NA
Appendicular lean mass	450,243 European ancestry individuals	22q13.31	22	45968281	WNT7B	WNT7B			ENSG00000188064	NA	NA	rs9330813	A	9330813	intron_variant	0	0.3154	7e-15	14.1549	NA	0.016	[0.012-0.02] unit decrease	45968281	G	A	0.316724	0.99411727		A	G	0.0228	-0.0125	0.0193	-0.01471	0.637	-0.00538	1	1
Appendicular lean mass	450,243 European ancestry individuals	3q12.3	3	101523907	FAM172BP	FAM172BP - TRMT10C	ENSG00000175841	ENSG00000174173		928	37961	rs13088318	A	13088318	intergenic_variant	1	0.6631	1e-17	17	NA	0.0171	[0.013-0.021] unit decrease	101523907	A	G	0.337467	0.99944364		G	A	0.27	0.0059	0.525	0.0039	0.254	0.01288	NA	NA
Appendicular lean mass	450,243 European ancestry individuals	3p25.3	3	11588778	VGLL4	VGLL4			ENSG00000144560	NA	NA	rs12633841	T	12633841	intron_variant	0	0.1778	6e-13	12.2218	NA	0.0179	[0.013-0.023] unit increase	11588778	G	T	0.176331	0.9954141		T	G	0.13	0.0102	0.314	0.00779	0.192	0.01826	NA	NA
Appendicular lean mass	450,243 European ancestry individuals	3p25.2	3	12346910	PPARG	PPARG			ENSG00000132170	NA	NA	rs7610055	A	7610055	intron_variant	0	0.1207	4e-38	37.3979	NA	0.0373	[0.032-0.043] unit decrease	12346910	G	A	0.12107	0.99989609		A	G	1.5e-10	-0.0502	1.36e-08	-0.05079	0.00302	-0.04843	1	1
Appendicular lean mass	450,243 European ancestry individuals	3q21.3	3	129316642	H1FX	H1-10-AS1			ENSG00000206417	NA	NA	rs4073154	A	4073154	intron_variant	0	0.2216	2e-33	32.699	NA	0.0274	[0.023-0.032] unit decrease	129316642	A	G	0.77717	0.99893539		!G	G	0.049	0.0121	0.253	0.00805	0.0462	0.02517	NA	1
Appendicular lean mass	450,243 European ancestry individuals	3q21.3	3	129333314	AC137695.1	H1-10-AS1 - MARK2P3	ENSG00000206417	ENSG00000270492		7089	1272	rs546819639	T	546819639	intergenic_variant	1	0.0936	1e-18	18	NA	0.0283	[0.022-0.035] unit increase	129333314	C	T	0.0994135	0.99860995		T	C	0.788	-0.0024	0.747	0.00314	0.193	-0.02652	NA	NA
Appendicular lean mass	450,243 European ancestry individuals	3q22.1	3	132465682	DNAJC13	DNAJC13			ENSG00000138246	NA	NA	rs9832919	A	9832919	intron_variant	0	0.6426	8e-20	19.0969	NA	0.0179	[0.014-0.022] unit increase	132465682	A	G	0.355966	0.99928145		G	A	0.906	6e-04	0.95	0.00038	0.884	0.00154	NA	NA
Appendicular lean mass	450,243 European ancestry individuals	3q22.2	3	134653644	KY	KY - RNU6-1174P	ENSG00000174611	ENSG00000253087		2008	126883	rs9883955	T	9883955	intron_variant	1	0.373	5e-21	20.301	NA	0.0184	[0.015-0.022] unit increase	134653644	T	G	0.628505	0.99594509		!G	G	0.000186	0.0198	0.000251	0.02213	0.274	0.01211	NA	1
Appendicular lean mass	450,243 European ancestry individuals	3p25.1	3	13764081	intergenic	LINC00620 - WNT7A	ENSG00000224514	ENSG00000154764		17443	52177	rs7615332	A	7615332	intergenic_variant	1	0.4221	2e-26	25.699	NA	0.0203	[0.017-0.024] unit increase	13764081	A	G	0.578471	0.99963528		!G	G	0.00675	0.0141	0.0296	0.01295	0.0962	0.01787	NA	1
Appendicular lean mass	450,243 European ancestry individuals	3q23	3	141402972	ZBTB38	ZBTB38			ENSG00000177311	NA	NA	rs2871960	A	2871960	5_prime_UTR_variant	0	0.5552	2e-135	134.699	NA	0.0469	[0.043-0.051] unit decrease	141402972	A	C	0.447527	0.99982878		C	A	0.601	-0.0027	0.768	0.00176	0.112	-0.01691	NA	NA
Appendicular lean mass	450,243 European ancestry individuals	3q25.1	3	150483998	intergenic	TSC22D2 - SERP1	ENSG00000196428	ENSG00000120742		17576	58000	rs35408555	A	35408555	intergenic_variant	1	0.7718	2e-09	8.69897	NA	0.0136	[0.0091-0.0181] unit increase	150483998	A	G	0.230275	0.99786403		G	A	0.00144	-0.0193	0.000364	-0.02477	0.863	-0.00211	1	1
Appendicular lean mass	450,243 European ancestry individuals	3q25.2	3	152300313	MBNL1	MBNL1			ENSG00000152601	NA	NA	rs74497536	A	74497536	synonymous_variant	0	0.0232	2e-09	8.69897	NA	0.0383	[0.026-0.051] unit increase	152300313	G	A	0.0242154	0.99746787		A	G	0.0248	0.0375	0.00282	0.05795	0.517	-0.02133	1	1
Appendicular lean mass	450,243 European ancestry individuals	3q25.31	3	157080943	LINC02029	LEKR1 - LINC00880	ENSG00000197980	ENSG00000243629		34814	724	rs900399	A	900399	intergenic_variant	1	0.6014	1e-17	17	NA	0.0164	[0.013-0.02] unit decrease	157080943	A	G	0.396322	0.9857772		G	A	0.0772	-0.0093	0.0342	-0.0127	0.836	0.00231	NA	NA
Appendicular lean mass	450,243 European ancestry individuals	3q25.32	3	158097672	SHOX2	SHOX2			ENSG00000168779	NA	NA	rs1048243	A	1048243	3_prime_UTR_variant	0	0.635	3e-14	13.5229	NA	0.0149	[0.011-0.019] unit decrease	158097672	A	G	0.364279	0.99955078		G	A	0.438	-0.0042	0.483	-0.00427	0.737	-0.00384	NA	NA
Appendicular lean mass	450,243 European ancestry individuals	3q25.32	3	158097672	SHOX2	SHOX2			ENSG00000168779	NA	NA	rs1048243	A	1048243	3_prime_UTR_variant	0	0.635	3e-14	13.5229	NA	0.0149	[0.011-0.019] unit decrease	158097672	A	T	0.000327696	0.8936156		T	A	0.888	0.0243	0.888	0.02426	NA	NA	NA	NA
Appendicular lean mass	450,243 European ancestry individuals	3q26.2	3	169400004	MECOM	MECOM			ENSG00000085276	NA	NA	rs2115959	A	2115959	intron_variant	0	0.4543	6e-14	13.2218	NA	0.0142	[0.01-0.018] unit decrease	169400004	A	C	0.547767	0.99963143		!C	C	0.0896	-0.0088	0.226	-0.00717	0.186	-0.01422	NA	NA
Appendicular lean mass	244,730 European ancestry women	3q26.2	3	170113480	PHC3	PHC3			ENSG00000173889	NA	NA	rs73181210	T	73181210	missense_variant	0	0.993	3e-07	6.52288	NA	0.08	[0.051-0.109] unit decrease	170113480	T	C	0.00705688	0.99165894		C	T	6.97e-05	0.1082	0.00223	0.10334	0.0106	0.11703	1	1
Appendicular lean mass	450,243 European ancestry individuals	3q26.2	3	170113480	PHC3	PHC3			ENSG00000173889	NA	NA	rs73181210	T	73181210	missense_variant	0	0.9928	6e-15	14.2218	NA	0.087	[0.065-0.109] unit decrease	170113480	T	C	0.00705688	0.99165894		C	T	6.97e-05	0.1082	0.00223	0.10334	0.0106	0.11703	1	1
Appendicular lean mass	205,513 European ancestry men	3q26.2	3	170113480	PHC3	PHC3			ENSG00000173889	NA	NA	rs73181210	T	73181210	missense_variant	0	0.993	5e-09	8.30103	NA	0.1	[0.067-0.133] unit decrease	170113480	T	C	0.00705688	0.99165894		C	T	6.97e-05	0.1082	0.00223	0.10334	0.0106	0.11703	1	1
Appendicular lean mass	450,243 European ancestry individuals	3q26.31	3	172067378	FNDC3B	FNDC3B			ENSG00000075420	NA	NA	rs9647379	C	9647379	intron_variant	0	0.4111	3e-21	20.5229	NA	0.018	[0.014-0.022] unit increase	172067378	G	C	0.411106	0.99778678		C	G	0.48	0.0037	0.564	0.00339	0.676	0.00461	NA	NA
Appendicular lean mass	450,243 European ancestry individuals	3q26.31	3	172257122	FNDC3B	FNDC3B			ENSG00000075420	NA	NA	rs4894532	T	4894532	intron_variant	0	0.3648	2e-45	44.699	NA	0.0278	[0.024-0.032] unit increase	172257122	G	T	0.365959	0.99869725		T	G	0.0753	0.0094	0.0574	0.01157	0.804	0.00269	NA	NA
Appendicular lean mass	450,243 European ancestry individuals	3q27.1	3	184190214	ABCF3	ABCF3			ENSG00000161204	NA	NA	rs843342	T	843342	non_coding_transcript_exon_variant	0	0.4809	1e-09	9	NA	0.0112	[0.0077-0.0147] unit decrease	184190214	T	C	0.519948	0.99920366		!C	C	0.000892	-0.0171	0.00748	-0.01571	0.0422	-0.02172	NA	1
Appendicular lean mass	244,730 European ancestry women	3q27.1	3	184302754	PSMD2	PSMD2			ENSG00000175166	NA	NA	rs11545169	T	11545169	missense_variant	0	0.161	9e-25	24.0458	NA	0.04	[0.034-0.046] unit decrease	184302754	G	T	0.161685	0.99862346		T	G	0.0261	-0.0157	0.0725	-0.01433	0.172	-0.02056	1	1
Appendicular lean mass	205,513 European ancestry men	3q27.1	3	184302754	PSMD2	PSMD2			ENSG00000175166	NA	NA	rs11545169	T	11545169	missense_variant	0	0.161	3e-21	20.5229	NA	0.04	[0.032-0.048] unit decrease	184302754	G	T	0.161685	0.99862346		T	G	0.0261	-0.0157	0.0725	-0.01433	0.172	-0.02056	1	1
Appendicular lean mass	450,243 European ancestry individuals	3q27.1	3	184302754	PSMD2	PSMD2			ENSG00000175166	NA	NA	rs11545169	T	11545169	missense_variant	0	0.1613	8e-43	42.0969	NA	0.0352	[0.03-0.04] unit decrease	184302754	G	T	0.161685	0.99862346		T	G	0.0261	-0.0157	0.0725	-0.01433	0.172	-0.02056	1	1
Appendicular lean mass	450,243 European ancestry individuals	3q27.2	3	185830875	intergenic	IGF2BP2 - TRA2B	ENSG00000073792	ENSG00000136527		5833	83683	rs2194411	A	2194411	intergenic_variant	1	0.1283	2e-54	53.699	NA	0.0443	[0.039-0.05] unit increase	185830875	G	A	0.128711	0.98985405		A	G	0.267	0.0086	0.566	0.00503	0.194	0.02172	NA	NA
Appendicular lean mass	450,243 European ancestry individuals	3q27.3	3	187725526	BCL6	BCL6			ENSG00000113916	NA	NA	rs61732778	A	61732778	synonymous_variant	0	0.071	3e-10	9.52288	NA	0.023	[0.016-0.03] unit increase	187725526	G	A	0.070958	0.99920938		A	G	0.218	-0.0118	0.397	-0.00968	0.341	-0.01653	NA	NA
Appendicular lean mass	450,243 European ancestry individuals	3q29	3	194009724	AC024559.1	LINC02028			ENSG00000230102	NA	NA	rs62288215	A	62288215	non_coding_transcript_exon_variant	0	0.6078	2e-09	8.69897	NA	0.0116	[0.0079-0.0153] unit increase	194009724	A	C	0.392551	0.99866839		C	A	0.291	0.0056	0.404	0.00503	0.502	0.0073	NA	NA
Appendicular lean mass	450,243 European ancestry individuals	3q29	3	197160369	DLG1	DLG1			ENSG00000075711	NA	NA	rs11461979	T	11461979	intron_variant	0	0.7351	1e-10	10	NA	0.0143	[0.01-0.0186] unit decrease	197160368	TAA	T	2.73137e-05	0.83854032		T	TAA	0.558	-0.4059	0.558	-0.40593	NA	NA	NA	NA
Appendicular lean mass	450,243 European ancestry individuals	3p24.3	3	23120187	intergenic	SALL4P5 - RPL24P7	ENSG00000231915	ENSG00000215016		128605	14185	rs73040019	T	73040019	intergenic_variant	1	0.8419	2e-14	13.699	NA	0.0199	[0.015-0.025] unit decrease	23120187	T	C	0.159138	0.99887988		C	T	0.288	-0.0075	0.631	-0.0039	0.197	-0.01806	NA	NA
Appendicular lean mass	450,243 European ancestry individuals	3p24.3	3	23120187	intergenic	SALL4P5 - RPL24P7	ENSG00000231915	ENSG00000215016		128605	14185	rs73040019	T	73040019	intergenic_variant	1	0.8419	2e-14	13.699	NA	0.0199	[0.015-0.025] unit decrease	23120187	T	G	1.58055e-05	0.78030889		G	T	0.498	0.3344	0.498	0.3344	NA	NA	NA	NA
Appendicular lean mass	450,243 European ancestry individuals	3p24.2	3	24098018	LINC00691	LINC00691			ENSG00000224074	NA	NA	rs6550846	T	6550846	intron_variant	0	0.7895	2e-15	14.699	NA	0.0183	[0.014-0.023] unit increase	24098018	T	C	0.208943	0.99943623		C	T	0.033	-0.0133	0.00315	-0.02112	0.355	0.01191	1	1
Appendicular lean mass	450,243 European ancestry individuals	3p24.2	3	24323019	THRB	THRB			ENSG00000151090	NA	NA	rs4858605	T	4858605	intron_variant	0	0.1848	5e-11	10.301	NA	0.0158	[0.011-0.021] unit increase	24323019	C	T	0.185336	0.99507012		T	C	0.492	0.0046	0.583	0.00415	0.668	0.00596	NA	NA
Appendicular lean mass	450,243 European ancestry individuals	3p24.2	3	25075091	AC092422.1	RARB			ENSG00000077092	NA	NA	rs4858697	A	4858697	intron_variant	0	0.4184	3e-14	13.5229	NA	0.0145	[0.011-0.018] unit decrease	25075091	A	G	0.581913	0.99835121		!G	G	0.112	-0.0069	0.0306	-0.01282	0.921	-0.00115	NA	NA
Appendicular lean mass	450,243 European ancestry individuals	3p24.1	3	27494440	intergenic	UBA52P4 - RNU1-96P	ENSG00000230807	ENSG00000201033		7823	19431	rs591668	A	591668	intergenic_variant	1	0.396	2e-19	18.699	NA	0.0174	[0.014-0.021] unit decrease	27494440	G	A	0.395977	0.99893068		A	G	0.0335	-0.0112	0.0343	-0.0127	0.576	-0.00615	1	1
Appendicular lean mass	450,243 European ancestry individuals	3p22.3	3	33221657	SUSD5	SUSD5 - FBXL2	ENSG00000173705	ENSG00000153558		2847	55368	rs77156651	A	77156651	intergenic_variant	1	0.0537	7e-16	15.1549	NA	0.0338	[0.026-0.042] unit decrease	33221657	G	A	0.0542447	0.99921944		A	G	0.156	-0.0159	0.253	-0.01483	0.395	-0.01883	NA	NA
Appendicular lean mass	450,243 European ancestry individuals	3p22.3	3	33731877	AC112220.1	CLASP2 - SDAD1P3	ENSG00000163539	ENSG00000227707		13521	40086	rs72858391	A	72858391	intergenic_variant	1	0.0271	1e-14	14	NA	0.0449	[0.034-0.056] unit increase	33731877	G	A	0.0274479	0.99885035		A	G	0.548	-0.0093	0.271	0.01986	0.0032	-0.08686	NA	NA
Appendicular lean mass	450,243 European ancestry individuals	3p22.2	3	38496180	EXOG	EXOG			ENSG00000157036	NA	NA	rs9838614	T	9838614	5_prime_UTR_variant	0	0.6119	1e-21	21	NA	0.0185	[0.015-0.022] unit increase	38496180	T	A	1.16177e-05	1		A	T	0.579	-0.5536	0.579	-0.55364	NA	NA	NA	NA
Appendicular lean mass	450,243 European ancestry individuals	3p22.2	3	38496180	EXOG	EXOG			ENSG00000157036	NA	NA	rs9838614	T	9838614	5_prime_UTR_variant	0	0.6119	1e-21	21	NA	0.0185	[0.015-0.022] unit increase	38496180	T	G	0.387543	0.99965813		G	T	1.59e-09	-0.0317	3.57e-07	-0.03055	0.00109	-0.03555	1	1
Appendicular lean mass	450,243 European ancestry individuals	3p21.31	3	49722998	RNF123	GMPPB			ENSG00000173540	NA	NA	rs34345884	C	34345884	missense_variant	0	0.0214	6e-10	9.22185	NA	0.0406	[0.028-0.054] unit decrease	49722998	G	C	0.0211312	0.99987318		C	G	0.589	-0.0101	0.333	-0.01999	0.438	0.03363	NA	NA
Appendicular lean mass	450,243 European ancestry individuals	3p21.31	3	50403121	CACNA2D2	CACNA2D2			ENSG00000007402	NA	NA	rs17606778	A	17606778	intron_variant	0	0.1959	3e-12	11.5229	NA	0.0166	[0.012-0.021] unit increase	50403121	C	A	0.196898	0.9961478		A	C	0.0592	0.0119	0.131	0.01106	0.248	0.01441	NA	NA
Appendicular lean mass	450,243 European ancestry individuals	3p21.31	3	50595164	HEMK1	HEMK1			ENSG00000114735	NA	NA	rs140440099	A	140440099	3_prime_UTR_variant	0	0.0234	1e-22	22	NA	0.0613	[0.049-0.074] unit increase	50595164	G	A	0.0238236	0.99965382		A	G	0.948	-0.0011	0.959	-0.00101	0.969	-0.00115	NA	NA
Appendicular lean mass	450,243 European ancestry individuals	3p21.1	3	52810717	AC006254.1	ITIH3 - ITIH4	ENSG00000162267	ENSG00000055955		1918	2245	rs11717749	T	11717749	intergenic_variant	1	0.1147	5e-24	23.301	NA	0.0298	[0.024-0.036] unit increase	52810717	C	T	0.115075	0.99935914		T	C	0.118	0.0129	0.287	0.00981	0.171	0.02537	NA	NA
Appendicular lean mass	450,243 European ancestry individuals	3p21.1	3	53430028	CACNA1D	CACNA1D			ENSG00000157388	NA	NA	rs114718455	A	114718455	intron_variant	0	0.9651	4e-12	11.3979	NA	0.0354	[0.025-0.045] unit decrease	53430028	A	G	0.035177	0.99444543		G	A	0.386	0.013	0.652	0.00729	0.235	0.04689	NA	NA
Appendicular lean mass	450,243 European ancestry individuals	3p21.1	3	53640996	CACNA1D	CACNA1D			ENSG00000157388	NA	NA	rs148306862	T	148306862	intron_variant	0	0.7939	3e-09	8.52288	NA	0.0132	[0.0089-0.0175] unit decrease	53640995	T	TGAA	0.206094	0.99962663		TGAA	T	0.27	0.007	0.172	0.00993	0.858	-0.00231	NA	NA
Appendicular lean mass	450,243 European ancestry individuals	3p14.3	3	55455807	intergenic	LINC02030 - WNT5A	ENSG00000240708	ENSG00000114251		155069	9908	rs11130474	C	11130474	intergenic_variant	1	0.4618	2e-19	18.699	NA	0.0172	[0.013-0.021] unit increase	55455807	G	C	0.461571	0.9979407		C	G	0.352	0.0048	0.356	0.00541	0.806	0.00269	NA	NA
Appendicular lean mass	450,243 European ancestry individuals	3p14.3	3	56652301	TASOR	TASOR			ENSG00000163946	NA	NA	rs6762851	T	6762851	intron_variant	0	0.6427	1e-28	28	NA	0.0218	[0.018-0.026] unit increase	56652301	T	C	0.357517	0.99991016		C	T	0.984	1e-04	0.61	0.00314	0.387	-0.00942	NA	NA
Appendicular lean mass	450,243 European ancestry individuals	3p14.3	3	57307581	DNAH12	DNAH12			ENSG00000174844	NA	NA	rs550944	A	550944	intron_variant	0	0.6772	3e-09	8.52288	NA	0.012	[0.0081-0.0159] unit decrease	57307581	A	T	0.319092	0.99906649		T	A	0.511	0.0029	0.354	0.00578	0.988	0.00019	NA	NA
Appendicular lean mass	450,243 European ancestry individuals	3p13	3	72348128	intergenic	LINC00877 - RYBP	ENSG00000241163	ENSG00000163602		68625	23697	rs9809116	A	9809116	TF_binding_site_variant	1	0.5919	1e-16	16	NA	0.016	[0.012-0.02] unit increase	72348128	A	G	0.407637	0.99691948		G	A	0.943	4e-04	0.465	0.0044	0.235	-0.01307	NA	NA
Appendicular lean mass	450,243 European ancestry individuals	3p25.3	3	8598623	LMCD1-AS1	LMCD1-AS1			ENSG00000227110	NA	NA	rs6763944	T	6763944	intron_variant	0	0.7234	5e-11	10.301	NA	0.014	[0.0099-0.0181] unit increase	8598623	C	T	0.723576	0.99642651		!T	T	0.0303	-0.0124	0.136	-0.00981	0.0791	-0.02018	1	1
Appendicular lean mass	450,243 European ancestry individuals	3q12.1	3	98996979	AC091212.1	U7 - ACTG1P13	ENSG00000272215	ENSG00000241305		9530	218245	rs7633464	A	7633464	intron_variant	1	0.4786	1e-20	20	NA	0.0175	[0.014-0.021] unit increase	98996979	G	A	0.479631	0.9996286		!A	A	0.000734	-0.0173	0.00308	-0.01735	0.104	-0.0173	1	1
Appendicular lean mass	450,243 European ancestry individuals	3p25.3	3	9933702	IL17RC	IL17RC - CRELD1	ENSG00000163702	ENSG00000163703		72	91	rs2270894	C	2270894	intron_variant	1	0.7966	1e-42	42	NA	0.0332	[0.028-0.038] unit increase	9933702	C	G	0.212534	0.99102295		G	C	0.888	-9e-04	0.488	-0.00503	0.367	0.01115	NA	NA
Appendicular lean mass	450,243 European ancestry individuals	3q12.1	3	99854685	CMSS1	CMSS1, FILIP1L			ENSG00000184220, ENSG00000168386	NA	NA	rs35225638	T	35225638	intron_variant	0	0.3382	5e-12	11.301	NA	0.0138	[0.0099-0.0177] unit decrease	99854684	TGG	T	0	nan		NA	NA	NA	NA	NA	NA	NA	NA	NA	NA
Appendicular lean mass	450,243 European ancestry individuals	4p16.3	4	1012289	FGFRL1	FGFRL1			ENSG00000127418	NA	NA	rs35719905	T	35719905	5_prime_UTR_variant	0	0.5425	9e-27	26.0458	NA	0.0205	[0.017-0.024] unit increase	1012288	T	TA	0.457504	0.99594949		TA	T	0.0017	-0.0161	0.0174	-0.01395	0.0285	-0.02345	1	1
Appendicular lean mass	450,243 European ancestry individuals	4q24	4	105279478	TET2	TET2			ENSG00000168769	NA	NA	rs143847362	A	143847362	3_prime_UTR_variant	0	0.9745	3e-12	11.5229	NA	0.0423	[0.031-0.054] unit increase	105279478	A	G	0.0272118	0.99588876		G	A	0.251	-0.0182	0.139	-0.02665	0.743	0.01095	NA	NA
Appendicular lean mass	450,243 European ancestry individuals	4q25	4	107939926	CYP2U1	CYP2U1, CYP2U1-AS1			ENSG00000155016, ENSG00000245293	NA	NA	rs1493132	T	1493132	intron_variant	0	0.6614	3e-11	10.5229	NA	0.0132	[0.0093-0.0171] unit decrease	107939926	T	C	0.339567	0.99990959		C	T	0.287	0.0057	0.0627	0.01144	0.254	-0.01249	NA	NA
Appendicular lean mass	450,243 European ancestry individuals	4q26	4	119221151	USP53	USP53			ENSG00000145390	NA	NA	rs10007409	T	10007409	non_coding_transcript_exon_variant	0	0.3101	7e-22	21.1549	NA	0.0196	[0.016-0.024] unit decrease	119221151	C	T	0.310115	0.9994524		T	C	0.00863	-0.0144	0.0823	-0.01094	0.0237	-0.02517	1	1
Appendicular lean mass	450,243 European ancestry individuals	4q27	4	121792708	intergenic	PP12613 - EXOSC9	ENSG00000226757	ENSG00000123737		25894	8610	rs6821305	A	6821305	regulatory_region_variant	1	0.601	3e-26	25.5229	NA	0.0204	[0.017-0.024] unit decrease	121792708	A	C	0.396946	0.99931218		C	A	0.486	0.0037	0.225	0.00729	0.455	-0.00807	NA	NA
Appendicular lean mass	450,243 European ancestry individuals		NA	NA	NUDT6					NA	NA	chr4:123831230	A	NA		1	0.7882	3e-30	29.5229	NA	0.0264	[0.022-0.031] unit decrease	123831230	G	A	3.72502e-06	0.9398406		NA	NA	NA	NA	NA	NA	NA	NA	NA	NA
Appendicular lean mass	450,243 European ancestry individuals		NA	NA	NUDT6					NA	NA	chr4:123831230	A	NA		1	0.7882	3e-30	29.5229	NA	0.0264	[0.022-0.031] unit decrease	123831230	G	A	3.72502e-06	0.9398406		NA	NA	NA	NA	NA	NA	NA	NA	NA	NA
Appendicular lean mass	450,243 European ancestry individuals	4q28.1	4	124035957	intergenic	LINC01091 - PPIAP76	ENSG00000249464	ENSG00000250484		73253	26505	rs10518426	T	10518426	intergenic_variant	1	0.5838	3e-22	21.5229	NA	0.0186	[0.015-0.022] unit decrease	124035957	T	C	0.415857	0.99937137		C	T	0.951	0	0.858	-0.00101	0.922	0.00115	NA	NA
Appendicular lean mass	450,243 European ancestry individuals	4p15.33	4	12900129	intergenic	ECM1P2 - U6	ENSG00000249995	ENSG00000283290		259120	151213	rs223929	A	223929	intergenic_variant	1	0.7179	2e-20	19.699	NA	0.0195	[0.015-0.024] unit increase	12900129	A	C	0.282232	0.99918188		C	A	0.424	0.0046	0.241	0.00767	0.646	-0.00538	NA	NA
Appendicular lean mass	450,243 European ancestry individuals	4p16.3	4	1347765	UVSSA	UVSSA			ENSG00000163945	NA	NA	rs111391498	A	111391498	splice_donor_5th_base_variant	0	0.9523	4e-14	13.3979	NA	0.0334	[0.025-0.042] unit increase	1347765	A	G	0.0485726	0.99916163		G	A	0.49	-0.0066	0.324	-0.01333	0.992	0.00019	NA	NA
Appendicular lean mass	450,243 European ancestry individuals	4q31.21	4	144647200	HHIP	HHIP-AS1, HHIP			ENSG00000248890, ENSG00000164161	NA	NA	rs7689420	T	7689420	non_coding_transcript_exon_variant	0	0.1688	1e-76	76	NA	0.0466	[0.042-0.051] unit decrease	144647200	T	C	0.831327	0.99975868		!C	C	0.345	-0.0065	0.345	-0.00729	0.824	-0.00346	NA	NA
Appendicular lean mass	450,243 European ancestry individuals	4q31.21	4	145061473	ANAPC10	ANAPC10			ENSG00000164162	NA	NA	rs116662954	A	116662954	intron_variant	0	0.0274	9e-19	18.0458	NA	0.0518	[0.04-0.063] unit decrease	145061473	G	A	0.0272715	0.98907075		A	G	0.664	0.0066	0.661	-0.00792	0.131	0.04324	NA	NA
Appendicular lean mass	450,243 European ancestry individuals	4q31.21	4	145061473	ANAPC10	ANAPC10			ENSG00000164162	NA	NA	rs116662954	A	116662954	intron_variant	0	0.0274	9e-19	18.0458	NA	0.0518	[0.04-0.063] unit decrease	145061473	GAGGTCTTGAACTTAGTACAAATAGGCTACGAAACTAGAAAATAAAG	GAGGTCTTGAACTTAATACAAATAGGCTACGAAACTAGAAAATAAAG	1.14267e-05	0.88280513		NA	NA	NA	NA	NA	NA	NA	NA	NA	NA
Appendicular lean mass	450,243 European ancestry individuals	4q31.22	4	145939034	ZNF827	ZNF827 - Y_RNA	ENSG00000151612	ENSG00000201134		211	19094	rs7679276	A	7679276	TF_binding_site_variant	1	0.0456	6e-12	11.2218	NA	0.033	[0.024-0.042] unit increase	145939034	A	G	0.953186	0.98474759		!G	G	0.188	0.016	0.436	0.01081	0.189	0.03305	NA	NA
Appendicular lean mass	450,243 European ancestry individuals	4q31.3	4	151451807	FAM160A1	FHIP1A			ENSG00000164142	NA	NA	rs112946935	CT	112946935	intron_variant	0	0.564	2e-22	21.699	NA	0.0187	[0.015-0.022] unit decrease	151451806	C	CT	0.559251	0.99972712		!CT	CT	0.000941	0.0171	0.000867	0.01961	0.422	0.00865	1	1
Appendicular lean mass	450,243 European ancestry individuals	4q32.1	4	155714157	GUCY1A1	GUCY1A1			ENSG00000164116	NA	NA	rs7692387	A	7692387	intron_variant	0	0.1854	4e-12	11.3979	NA	0.0169	[0.012-0.022] unit increase	155714157	G	A	0.185222	0.99980713		A	G	0.101	0.0108	0.137	0.01119	0.48	0.00942	NA	NA
Appendicular lean mass	450,243 European ancestry individuals	4q32.1	4	156867652	PDGFC	PDGFC			ENSG00000145431	NA	NA	rs73856768	T	73856768	intron_variant	0	0.9195	2e-12	11.699	NA	0.0247	[0.018-0.032] unit increase	156867652	T	C	0.0789983	0.99759228		C	T	0.23	-0.0114	0.353	-0.01006	0.424	-0.01557	NA	NA
Appendicular lean mass	450,243 European ancestry individuals	4p16.3	4	1748760	TACC3	TACC3 - FGFR3	ENSG00000013810	ENSG00000068078		3589	44533	rs7680647	T	7680647	TF_binding_site_variant	1	0.6438	2e-20	19.699	NA	0.0184	[0.014-0.022] unit decrease	1748760	T	C	0.362436	0.99438819		C	T	0.853	-9e-04	0.914	-0.00063	0.832	-0.00231	NA	NA
Appendicular lean mass	450,243 European ancestry individuals	4q34.2	4	176508921	intergenic	SPCS3 - HAFML	ENSG00000129128	ENSG00000248388		176676	160700	rs395980	T	395980	intergenic_variant	1	0.7365	1e-17	17	NA	0.0184	[0.014-0.023] unit increase	176508921	T	G	0.263509	0.99916651		G	T	0.856	-0.0011	0.741	0.00214	0.288	-0.01364	NA	NA
Appendicular lean mass	450,243 European ancestry individuals	4q34.3	4	176864414	AC092673.1	VEGFC - LINC02509	ENSG00000150630	ENSG00000250263		71492	11274	rs6552198	A	6552198	intron_variant	1	0.6378	7e-18	17.1549	NA	0.0169	[0.013-0.021] unit decrease	176864414	G	A	0.636291	0.99951281		!A	A	0.905	-6e-04	0.498	0.00415	0.145	-0.01595	NA	NA
Appendicular lean mass	450,243 European ancestry individuals	4p15.31	4	17908613	LCORL	LCORL			ENSG00000178177	NA	NA	rs1472852	A	1472852	intron_variant	0	0.1582	8e-135	134.097	NA	0.0638	[0.059-0.069] unit decrease	17908613	C	A	0.156088	0.9998997		A	C	0.000116	-0.0282	0.000339	-0.02891	0.152	-0.02498	1	1
Appendicular lean mass	450,243 European ancestry individuals		NA	NA	LCORL					NA	NA	chr4:17941795	G	NA		1	0.7164	3e-48	47.5229	NA	0.0301	[0.026-0.034] unit decrease	17941795	T	G	0	nan		NA	NA	NA	NA	NA	NA	NA	NA	NA	NA
Appendicular lean mass	450,243 European ancestry individuals	4q35.1	4	183275101	WWC2	WWC2			ENSG00000151718	NA	NA	rs10015974	A	10015974	intron_variant	0	0.2407	1e-15	15	NA	0.0177	[0.013-0.022] unit decrease	183275101	A	G	0.759639	0.99954673		!G	G	0.125	-0.0091	0.0553	-0.01307	0.786	0.00327	NA	NA
Appendicular lean mass	450,243 European ancestry individuals	4p15.2	4	21851144	KCNIP4	KCNIP4, KCNIP4-IT1			ENSG00000185774, ENSG00000280650	NA	NA	rs60799144	A	60799144	non_coding_transcript_exon_variant	0	0.4001	1e-11	11	NA	0.0132	[0.0095-0.0169] unit increase	21851144	A	T	0.609467	0.99910617		!T	T	0.0604	0.0099	0.163	0.00842	0.177	0.01461	NA	NA
Appendicular lean mass	450,243 European ancestry individuals	4p15.2	4	24025603	intergenic	PPARGC1A - DHX15	ENSG00000109819	ENSG00000109606		121514	491838	rs2324154	A	2324154	intergenic_variant	1	0.5096	2e-15	14.699	NA	0.015	[0.011-0.019] unit increase	24025603	C	A	0.508346	0.99906815		!A	A	3.06e-06	-0.024	4.39e-05	-0.02401	0.0242	-0.02383	1	1
Appendicular lean mass	450,243 European ancestry individuals	4p16.3	4	3450618	HGFAC	HGFAC - DOK7	ENSG00000109758	ENSG00000175920		1132	12688	rs59950280	A	59950280	intergenic_variant	1	0.3316	7e-36	35.1549	NA	0.0254	[0.021-0.029] unit decrease	3450618	G	A	0.333136	0.99500459		A	G	0.637	0.0025	0.497	0.00415	0.788	-0.00307	NA	NA
Appendicular lean mass	450,243 European ancestry individuals	4q12	4	53406492	AC058822.1	FIP1L1			ENSG00000145216	NA	NA	rs74416750	T	74416750	intron_variant	0	0.1497	5e-15	14.301	NA	0.0208	[0.016-0.026] unit decrease	53406492	C	T	0.150489	0.99947923		T	C	0.000237	-0.0268	0.000365	-0.02904	0.278	-0.01787	1	1
Appendicular lean mass	450,243 European ancestry individuals	4q12	4	56953628	REST	REST			ENSG00000084093	NA	NA	rs781669	T	781669	intron_variant	0	0.5236	3e-18	17.5229	NA	0.0164	[0.013-0.02] unit increase	56953628	C	T	0.523739	0.9998297		!T	T	0.118	-0.008	0.0491	-0.01144	0.732	0.00365	NA	NA
Appendicular lean mass	450,243 European ancestry individuals	4p16.2	4	5767499	EVC	EVC, CRMP1			ENSG00000072840, ENSG00000072832	NA	NA	rs183275998	C	183275998	intron_variant	0	0.2842	8e-11	10.0969	NA	0.0138	[0.0097-0.0179] unit increase	5767499	G	C	6.16283e-05	0.34898095		C	G	0.941	-8e-04	NA	NA	0.942	-0.00077	NA	NA
Appendicular lean mass	450,243 European ancestry individuals	4p16.3	4	704503	PCGF3	SLC49A3 - PCGF3	ENSG00000169026	ENSG00000185619		15232	1245	rs6837180	A	6837180	intergenic_variant	1	0.4163	3e-10	9.52288	NA	0.0127	[0.0088-0.0166] unit decrease	704503	A	G	0.580665	0.98272199		!G	G	0.472	-0.0038	0.209	-0.00754	0.441	0.00826	NA	NA
Appendicular lean mass	450,243 European ancestry individuals	4q13.3	4	72315920	ADAMTS3	ADAMTS3			ENSG00000156140	NA	NA	rs139921635	T	139921635	missense_variant	0	0.0236	3e-10	9.52288	NA	0.0395	[0.027-0.052] unit increase	72315920	G	T	0.0238848	0.98670327		T	G	0.266	0.0177	0.232	0.02288	0.83	0.00615	NA	NA
Appendicular lean mass	244,730 European ancestry women	4q13.3	4	72315920	ADAMTS3	ADAMTS3			ENSG00000156140	NA	NA	rs139921635	T	139921635	missense_variant	0	0.024	3e-06	5.52288	NA	0.04	[0.024-0.056] unit increase	72315920	G	T	0.0238848	0.98670327		T	G	0.266	0.0177	0.232	0.02288	0.83	0.00615	NA	NA
Appendicular lean mass	450,243 European ancestry individuals	4q13.3	4	72683842	intergenic	ADAMTS3 - HNRNPA1P67	ENSG00000156140	ENSG00000270665		114621	123425	rs58083390	T	58083390	intergenic_variant	1	0.0708	3e-18	17.5229	NA	0.0327	[0.025-0.04] unit decrease	72683842	C	T	0.0723212	0.99042717		T	C	0.000438	-0.0342	0.00422	-0.03218	0.038	-0.04016	1	1
Appendicular lean mass	450,243 European ancestry individuals	4q21.21	4	80603932	CFAP299	CFAP299			ENSG00000197826	NA	NA	rs112948778	T	112948778	intron_variant	0	0.0169	1e-22	22	NA	0.0723	[0.058-0.087] unit increase	80603932	C	T	0.0175384	0.99767957		T	C	0.705	0.0073	0.484	0.01534	0.627	-0.01941	NA	NA
Appendicular lean mass	450,243 European ancestry individuals	4q21.21	4	81253011	intergenic	PRKG2 - RNU5A-2P	ENSG00000138669	ENSG00000207065		37789	81292	rs1443536	A	1443536	intergenic_variant	1	0.695	2e-26	25.699	NA	0.0218	[0.018-0.026] unit decrease	81253011	A	G	0.304419	0.99919265		G	A	0.833	0.0012	0.653	-0.00289	0.229	0.01345	NA	NA
Appendicular lean mass	450,243 European ancestry individuals	4q21.23	4	85798012	ARHGAP24	ARHGAP24			ENSG00000138639	NA	NA	rs17010957	T	17010957	intron_variant	0	0.8515	6e-20	19.2218	NA	0.0245	[0.019-0.03] unit increase	85798012	T	A	6.97842e-09	0.0023333264		NA	NA	NA	NA	NA	NA	NA	NA	NA	NA
Appendicular lean mass	450,243 European ancestry individuals	4q21.23	4	85798012	ARHGAP24	ARHGAP24			ENSG00000138639	NA	NA	rs17010957	T	17010957	intron_variant	0	0.8515	6e-20	19.2218	NA	0.0245	[0.019-0.03] unit increase	85798012	T	C	0.149689	0.99654827		C	T	0.253	-0.0083	0.295	-0.00855	0.643	-0.0073	NA	NA
Appendicular lean mass	450,243 European ancestry individuals	4p16.1	4	8608121	CPZ	GPR78, CPZ			ENSG00000155269, ENSG00000109625	NA	NA	rs62288581	A	62288581	intron_variant	0	0.4206	3e-12	11.5229	NA	0.0135	[0.0098-0.0172] unit decrease	8608121	G	A	0.416974	0.99722571		A	G	0.314	0.0053	0.345	0.00566	0.71	0.00404	NA	NA
Appendicular lean mass	450,243 European ancestry individuals	4q22.1	4	87636601	AC093895.1	DSPP - DMP1	ENSG00000152591	ENSG00000152592		19728	13679	rs1841738	A	1841738	intron_variant	1	0.4817	1e-24	24	NA	0.0195	[0.016-0.023] unit increase	87636601	A	G	0.521299	0.99201048		!G	G	0.209	0.0064	0.39	0.00503	0.296	0.01115	NA	NA
Appendicular lean mass	450,243 European ancestry individuals	4q22.1	4	89121634	AC104785.1	TIGD2 - RNU6-907P	ENSG00000180346	ENSG00000212226		6733	9218	rs62306393	A	62306393	intergenic_variant	1	0.6467	1e-11	11	NA	0.0134	[0.0095-0.0173] unit decrease	89121634	A	C	0.351008	0.99825698		C	A	8.32e-05	0.0215	0.00394	0.01773	0.00282	0.03536	1	1
Appendicular lean mass	450,243 European ancestry individuals	4q22.1	4	89899156	MMRN1	MMRN1			ENSG00000138722	NA	NA	rs78896073	A	78896073	intron_variant	0	0.0464	3e-10	9.52288	NA	0.0283	[0.019-0.037] unit decrease	89899156	T	A	0.0474845	0.99912513		A	T	0.116	-0.0196	0.126	-0.02112	0.666	-0.01268	NA	NA
Appendicular lean mass	450,243 European ancestry individuals	5q21.1	5	103003035	PAM	PAM			ENSG00000145730	NA	NA	rs78408340	C	78408340	missense_variant	0	0.9905	6e-16	15.2218	NA	0.0786	[0.06-0.098] unit increase	103003035	C	G	0.00972141	0.99463895		G	C	2.74e-07	-0.1356	7.53e-07	-0.14268	0.128	-0.09935	1	1
Appendicular lean mass	244,730 European ancestry women	5q21.1	5	103003035	PAM	PAM			ENSG00000145730	NA	NA	rs78408340	C	78408340	missense_variant	0	0.991	5e-09	8.30103	NA	0.07	[0.045-0.095] unit increase	103003035	C	G	0.00972141	0.99463895		G	C	2.74e-07	-0.1356	7.53e-07	-0.14268	0.128	-0.09935	1	1
Appendicular lean mass	205,513 European ancestry men	5q21.1	5	103003035	PAM	PAM			ENSG00000145730	NA	NA	rs78408340	C	78408340	missense_variant	0	0.991	7e-09	8.1549	NA	0.09	[0.061-0.119] unit increase	103003035	C	G	0.00972141	0.99463895		G	C	2.74e-07	-0.1356	7.53e-07	-0.14268	0.128	-0.09935	1	1
Appendicular lean mass	450,243 European ancestry individuals	5q21.1	5	103003035	PAM	PAM			ENSG00000145730	NA	NA	rs78408340	C	78408340	missense_variant	0	0.9905	6e-16	15.2218	NA	0.0786	[0.06-0.098] unit increase	103003035	C	T	0.000124588	0.99560875		T	C	0.523	-0.2123	0.523	-0.21233	NA	NA	NA	NA
Appendicular lean mass	205,513 European ancestry men	5q21.1	5	103003035	PAM	PAM			ENSG00000145730	NA	NA	rs78408340	C	78408340	missense_variant	0	0.991	7e-09	8.1549	NA	0.09	[0.061-0.119] unit increase	103003035	C	T	0.000124588	0.99560875		T	C	0.523	-0.2123	0.523	-0.21233	NA	NA	NA	NA
Appendicular lean mass	244,730 European ancestry women	5q21.1	5	103003035	PAM	PAM			ENSG00000145730	NA	NA	rs78408340	C	78408340	missense_variant	0	0.991	5e-09	8.30103	NA	0.07	[0.045-0.095] unit increase	103003035	C	T	0.000124588	0.99560875		T	C	0.523	-0.2123	0.523	-0.21233	NA	NA	NA	NA
Appendicular lean mass	450,243 European ancestry individuals	5q22.2	5	112728778	APC	APC			ENSG00000134982	NA	NA	rs861674	A	861674	intron_variant	0	0.5422	1e-11	11	NA	0.0128	[0.0091-0.0165] unit decrease	112728778	A	T	0.457906	0.99974599		T	A	0.101	0.0084	0.255	0.00666	0.183	0.01422	NA	NA
Appendicular lean mass	450,243 European ancestry individuals	5q23.2	5	123363505	CEP120	CEP120			ENSG00000168944	NA	NA	rs34732995	CTA	34732995	intron_variant	0	0.4619	2e-55	54.699	NA	0.0296	[0.026-0.033] unit decrease	123363504	C	CTA	0.462458	0.999915		CTA	C	0.00338	-0.0172	0.00338	-0.01722	1	0	1	1
Appendicular lean mass	450,243 European ancestry individuals	5q23.2	5	124654577	ZNF608	ZNF608			ENSG00000168916	NA	NA	rs9327336	T	9327336	intron_variant	0	0.6565	2e-10	9.69897	NA	0.0127	[0.0088-0.0166] unit decrease	124654577	T	C	0.345	0.99987389		C	T	0.564	0.0031	0.836	0.00126	0.409	0.00922	NA	NA
Appendicular lean mass	450,243 European ancestry individuals	5q23.2	5	127288708	MEGF10	SELENOTP2 - MEGF10	ENSG00000271585	ENSG00000145794		111658	2088	rs7733373	A	7733373	non_coding_transcript_exon_variant	1	0.4887	2e-14	13.699	NA	0.0145	[0.011-0.018] unit increase	127288708	A	T	0.510389	0.99900586		T	A	0.0149	-0.0125	0.079	-0.01031	0.0637	-0.0196	1	1
Appendicular lean mass	450,243 European ancestry individuals	5q23.2	5	127877355	CCDC192	CCDC192			ENSG00000230561	NA	NA	rs7729769	A	7729769	intron_variant	0	0.5048	5e-11	10.301	NA	0.0148	[0.01-0.019] unit increase	127877355	A	G	0.0069618	0.99406276		G	A	0.897	0.0043	0.776	0.00981	0.506	-0.10051	NA	NA
Appendicular lean mass	450,243 European ancestry individuals	5q23.2	5	127877355	CCDC192	CCDC192			ENSG00000230561	NA	NA	rs7729769	A	7729769	intron_variant	0	0.5048	5e-11	10.301	NA	0.0148	[0.01-0.019] unit increase	127877355	A	T	5.81293e-06	0.99980024		T	A	0.281	-1.075	0.281	-1.07497	NA	NA	NA	NA
Appendicular lean mass	450,243 European ancestry individuals	5q23.3	5	128032306	LINC01184	SLC12A2-DT			ENSG00000245937	NA	NA	rs6860245	C	6860245	intron_variant	0	0.248	1e-159	159	NA	0.0589	[0.055-0.063] unit increase	128032306	G	C	0.248592	0.99944899		C	G	0.596	0.0025	0.96	-0.00038	0.119	0.02095	NA	NA
Appendicular lean mass	450,243 European ancestry individuals	5q23.3	5	128797049	SLC27A6	SLC27A6			ENSG00000113396	NA	NA	rs7735162	T	7735162	intron_variant	0	0.7244	3e-13	12.5229	NA	0.0155	[0.011-0.02] unit increase	128797049	T	C	0.274745	0.99923682		C	T	0.932	-4e-04	0.905	-0.00075	0.992	0.00019	NA	NA
Appendicular lean mass	450,243 European ancestry individuals	5q23.3	5	129734155	ADAMTS19	ADAMTS19			ENSG00000145808	NA	NA	rs6866701	A	6866701	intron_variant	0	0.076	8e-18	17.0969	NA	0.0306	[0.024-0.038] unit increase	129734155	A	G	0.92325	0.99944061		!G	G	0.58	-0.0053	0.288	-0.01169	0.47	0.01364	NA	NA
Appendicular lean mass	450,243 European ancestry individuals	5q31.1	5	131430969	AC008695.1	RAPGEF6			ENSG00000158987	NA	NA	rs1291602	T	1291602	missense_variant	0	0.1592	3e-32	31.5229	NA	0.0304	[0.025-0.035] unit decrease	131430969	T	C	0.840397	0.99903403		!C	C	0.018	-0.0164	0.0243	-0.01798	0.41	-0.01153	NA	1
Appendicular lean mass	205,513 European ancestry men	5q31.1	5	131430969	AC008695.1	RAPGEF6			ENSG00000158987	NA	NA	rs1291602	T	1291602	missense_variant	0	0.159	9e-16	15.0458	NA	0.03	[0.022-0.038] unit decrease	131430969	T	C	0.840397	0.99903403		!C	C	0.018	-0.0164	0.0243	-0.01798	0.41	-0.01153	NA	1
Appendicular lean mass	244,730 European ancestry women	5q31.1	5	131430969	AC008695.1	RAPGEF6			ENSG00000158987	NA	NA	rs1291602	T	1291602	missense_variant	0	0.159	4e-18	17.3979	NA	0.03	[0.024-0.036] unit decrease	131430969	T	C	0.840397	0.99903403		!C	C	0.018	-0.0164	0.0243	-0.01798	0.41	-0.01153	NA	1
Appendicular lean mass	450,243 European ancestry individuals	5q31.1	5	132261312	PDLIM4	PDLIM4, P4HA2			ENSG00000131435, ENSG00000072682	NA	NA	rs7735891	T	7735891	intron_variant	0	0.4629	1e-42	42	NA	0.0259	[0.022-0.03] unit increase	132261312	C	T	0.463365	0.99983624		T	C	0.00155	0.0163	0.0131	0.01458	0.0394	0.0221	1	1
Appendicular lean mass	450,243 European ancestry individuals	5q31.1	5	135038418	PITX1	PITX1-AS1			ENSG00000224186	NA	NA	rs4976261	C	4976261	intron_variant	0	0.2499	9e-43	42.0458	NA	0.0298	[0.025-0.034] unit decrease	135038418	G	C	0.249872	0.99847897		C	G	3.92e-07	-0.0301	5.37e-05	-0.02728	0.00144	-0.0394	1	1
Appendicular lean mass	450,243 European ancestry individuals	5q31.1	5	135132061	C5orf66	PITX1-AS1			ENSG00000224186	NA	NA	rs639933	A	639933	intron_variant	0	0.6333	8e-13	12.0969	NA	0.0134	[0.0097-0.0171] unit increase	135132061	C	A	0.632398	0.99642032		!A	A	0.332	-0.0051	0.678	-0.00251	0.216	-0.01326	NA	NA
Appendicular lean mass	450,243 European ancestry individuals	5q31.1	5	135251290	C5orf66-AS2	PITX1-AS1			ENSG00000224186	NA	NA	rs11242236	A	11242236	intron_variant	0	0.4533	2e-14	13.699	NA	0.0144	[0.011-0.018] unit decrease	135251290	G	A	0.45391	0.99657749		A	G	0.0658	-0.0095	0.156	-0.0083	0.214	-0.01345	NA	NA
Appendicular lean mass	450,243 European ancestry individuals	5q31.2	5	138272367	GFRA3	GFRA3			ENSG00000146013	NA	NA	rs12055045	T	12055045	intron_variant	0	0.2062	7e-20	19.1549	NA	0.0213	[0.017-0.026] unit increase	138272367	C	T	0.203772	0.99950157		T	C	0.192	0.0081	0.645	0.00327	0.0644	0.02345	NA	NA
Appendicular lean mass	450,243 European ancestry individuals	5q31.2	5	139679432	CXXC5	CXXC5			ENSG00000171604	NA	NA	rs3822742	A	3822742	intron_variant	0	0.3706	1e-16	16	NA	0.0162	[0.012-0.02] unit increase	139679432	C	A	0.369672	0.99627531		A	C	0.989	-1e-04	0.834	-0.00126	0.718	0.00404	NA	NA
Appendicular lean mass	450,243 European ancestry individuals	5q31.3	5	142432041	SPRY4-AS1	SPRY4-AS1			ENSG00000231185	NA	NA	rs153662	T	153662	intron_variant	0	0.5886	1e-12	12	NA	0.0136	[0.0099-0.0173] unit increase	142432041	G	T	0.588711	0.99739939		!T	T	0.459	0.0038	0.52	0.00377	0.714	0.00384	NA	NA
Appendicular lean mass	450,243 European ancestry individuals	5q31.3	5	143157909	ARHGAP26	ARHGAP26			ENSG00000145819	NA	NA	rs853170	T	853170	intron_variant	0	0.7398	6e-13	12.2218	NA	0.0155	[0.011-0.02] unit decrease	143157909	T	C	0.258149	0.99498162		C	T	0.000191	0.0219	0.00562	0.01861	0.00688	0.03286	1	1
Appendicular lean mass	450,243 European ancestry individuals	5q31.3	5	143157909	ARHGAP26	ARHGAP26			ENSG00000145819	NA	NA	rs853170	T	853170	intron_variant	0	0.7398	6e-13	12.2218	NA	0.0155	[0.011-0.02] unit decrease	143157909	T	G	0	nan		NA	NA	NA	NA	NA	NA	NA	NA	NA	NA
Appendicular lean mass	450,243 European ancestry individuals	5q33.1	5	150534839	NDST1	NDST1			ENSG00000070614	NA	NA	rs2545341	T	2545341	intron_variant	0	0.3691	3e-09	8.52288	NA	0.0116	[0.0077-0.0155] unit decrease	150534839	T	C	0.633403	0.9990701		!C	C	0.134	-0.008	0.0381	-0.01257	0.479	0.00807	NA	NA
Appendicular lean mass	450,243 European ancestry individuals	5q33.3	5	157369997	AC008676.3	CYFIP2			ENSG00000055163	NA	NA	rs10069931	T	10069931	intron_variant	0	0.3282	3e-13	12.5229	NA	0.0146	[0.011-0.019] unit decrease	157369997	C	T	0.326868	0.99960847		T	C	0.301	0.0055	0.757	0.00189	0.112	0.01768	NA	NA
Appendicular lean mass	450,243 European ancestry individuals	5q33.3	5	158468005	AC091979.2	LINC02227 - EBF1	ENSG00000276778	ENSG00000164330		58232	227915	rs13170063	A	13170063	regulatory_region_variant	1	0.5921	4e-15	14.3979	NA	0.0152	[0.011-0.019] unit decrease	158468005	G	A	0.604927	0.99968825		!A	A	0.00703	0.0142	0.0412	0.01232	0.0601	0.02056	1	1
Appendicular lean mass	450,243 European ancestry individuals	5q35.1	5	171437017	FGF18	FGF18			ENSG00000156427	NA	NA	rs4073717	T	4073717	intron_variant	0	0.2016	6e-34	33.2218	NA	0.0286	[0.024-0.033] unit decrease	171437017	G	T	0.201081	0.99850471		T	G	0.928	-5e-04	0.967	-0.00025	0.896	-0.00173	NA	NA
Appendicular lean mass	450,243 European ancestry individuals	5q35.1	5	171762567	intergenic	FGF18 - SMIM23	ENSG00000156427	ENSG00000185662		304941	19865	rs33852	A	33852	intergenic_variant	1	0.6771	1e-24	24	NA	0.0207	[0.017-0.025] unit decrease	171762567	A	G	0.322614	0.99978315		G	A	0.378	-0.0049	0.705	0.00239	0.0122	-0.02863	NA	NA
Appendicular lean mass	450,243 European ancestry individuals	5q35.1	5	171857639	FBXW11	SMIM23 - FBXW11	ENSG00000185662	ENSG00000072803		61513	3910	rs11424823	G	11424823	regulatory_region_variant	1	0.3799	1e-24	24	NA	0.0206	[0.017-0.025] unit decrease	171857638	G	GC	0.623575	0.99050859		!GC	GC	1	0	0.888	-0.00088	0.823	0.00231	NA	NA
Appendicular lean mass	450,243 European ancestry individuals	5q35.1	5	172744134	intergenic	NEURL1B - DUSP1	ENSG00000214357	ENSG00000120129		52594	23962	rs75767302	A	75767302	regulatory_region_variant	1	0.0441	9e-13	12.0458	NA	0.033	[0.024-0.042] unit increase	172744134	G	A	0.0447769	0.99642629		A	G	0.0627	0.0225	0.0356	0.02979	0.894	0.00307	NA	NA
Appendicular lean mass	450,243 European ancestry individuals	5q35.2	5	173326552	STC2	STC2			ENSG00000113739	NA	NA	rs6874142	T	6874142	intron_variant	0	0.8862	2e-14	13.699	NA	0.0242	[0.018-0.03] unit decrease	173326552	T	G	0.116594	0.98598288		G	T	0.288	0.0085	0.0444	0.01848	0.153	-0.02364	NA	NA
Appendicular lean mass	244,730 European ancestry women	5q35.2	5	173328063	STC2	STC2			ENSG00000113739	NA	NA	rs148833559	A	148833559	missense_variant	0	0.001	1e-30	30	NA	0.38	[0.31-0.45] unit increase	173328063	C	A	0.00143428	0.95712853		A	C	0.0187	0.1672	0.011	0.18819	0.732	-0.08859	1	1
Appendicular lean mass	205,513 European ancestry men	5q35.2	5	173328063	STC2	STC2			ENSG00000113739	NA	NA	rs148833559	A	148833559	missense_variant	0	0.001	7e-25	24.1549	NA	0.38	[0.31-0.45] unit increase	173328063	C	A	0.00143428	0.95712853		A	C	0.0187	0.1672	0.011	0.18819	0.732	-0.08859	1	1
Appendicular lean mass	450,243 European ancestry individuals	5q35.2	5	173328063	STC2	STC2			ENSG00000113739	NA	NA	rs148833559	A	148833559	missense_variant	0	0.0014	9e-52	51.0458	NA	0.3796	[0.33-0.43] unit increase	173328063	C	A	0.00143428	0.95712853		A	C	0.0187	0.1672	0.011	0.18819	0.732	-0.08859	1	1
Appendicular lean mass	450,243 European ancestry individuals	5q35.2	5	173331793	STC2	STC2 - MIR8056	ENSG00000113739	ENSG00000274994		3346	15662	rs6881592	A	6881592	intergenic_variant	1	0.6347	3e-21	20.5229	NA	0.0182	[0.014-0.022] unit increase	173331793	A	C	1.18656e-06	0.81249729		NA	NA	NA	NA	NA	NA	NA	NA	NA	NA
Appendicular lean mass	450,243 European ancestry individuals	5q35.2	5	173331793	STC2	STC2 - MIR8056	ENSG00000113739	ENSG00000274994		3346	15662	rs6881592	A	6881592	intergenic_variant	1	0.6347	3e-21	20.5229	NA	0.0182	[0.014-0.022] unit increase	173331793	A	G	0.365994	0.99758996		G	A	0.0494	-0.0105	0.0161	-0.01458	0.735	0.00384	1	1
Appendicular lean mass	450,243 European ancestry individuals	5q35.2	5	173567621	AC008663.1	RNU6-500P - LINC02995	ENSG00000199219	ENSG00000253955		205381	10654	rs7733195	A	7733195	intron_variant	1	0.3494	4e-21	20.3979	NA	0.0189	[0.015-0.023] unit decrease	173567621	G	A	0.348198	0.99867796		A	G	0.237	0.0063	0.321	0.00603	0.513	0.0073	NA	NA
Appendicular lean mass	450,243 European ancestry individuals	5q35.2	5	177082192	FGFR4	ZNF346 - FGFR4	ENSG00000113761	ENSG00000160867		1003	4713	rs244711	T	244711	intergenic_variant	1	0.686	2e-37	36.699	NA	0.0279	[0.024-0.032] unit increase	177082192	C	T	0.682555	0.97824808		!T	T	0.296	-0.0058	0.513	-0.00415	0.324	-0.01153	NA	NA
Appendicular lean mass	450,243 European ancestry individuals	5q35.3	5	177108205	intergenic	FGFR4 - NSD1	ENSG00000160867	ENSG00000165671		10061	23625	rs13177762	T	13177762	intergenic_variant	1	0.1374	4e-20	19.3979	NA	0.0255	[0.02-0.031] unit increase	177108205	C	T	0.139739	0.99758121		T	C	0.453	0.0054	0.704	0.00314	0.388	0.01288	NA	NA
Appendicular lean mass	450,243 European ancestry individuals	5q35.3	5	177553903	FAM193B	FAM193B			ENSG00000146067	NA	NA	rs62398471	A	62398471	3_prime_UTR_variant	0	0.2946	1e-17	17	NA	0.0178	[0.014-0.022] unit increase	177553903	G	A	0.293921	0.99035628		A	G	0.00181	0.0175	0.021	0.01483	0.0234	0.02614	1	1
Appendicular lean mass	450,243 European ancestry individuals	5p13.3	5	32711527	NPR3	NPR3			ENSG00000113389	NA	NA	rs9716700	A	9716700	5_prime_UTR_variant	0	0.1901	1e-17	17	NA	0.0222	[0.017-0.027] unit decrease	32711527	C	A	0.197384	0.98557429		A	C	0.975	-2e-04	0.383	-0.00654	0.145	0.01903	NA	NA
Appendicular lean mass	450,243 European ancestry individuals	5p13.3	5	32831833	intergenic	NPR3 - LINC02120	ENSG00000113389	ENSG00000248279		40109	115610	rs12656497	T	12656497	regulatory_region_variant	1	0.4037	1e-40	40	NA	0.0256	[0.022-0.029] unit increase	32831833	T	A	5.10217e-07	0.14469433		NA	NA	NA	NA	NA	NA	NA	NA	NA	NA
Appendicular lean mass	450,243 European ancestry individuals	5p13.3	5	32831833	intergenic	NPR3 - LINC02120	ENSG00000113389	ENSG00000248279		40109	115610	rs12656497	T	12656497	regulatory_region_variant	1	0.4037	1e-40	40	NA	0.0256	[0.022-0.029] unit increase	32831833	T	C	0.596811	0.99985377		!C	C	0.359	-0.0048	0.487	-0.00415	0.519	-0.00711	NA	NA
Appendicular lean mass	450,243 European ancestry individuals	5p13.3	5	33366720	intergenic	LINC02160 - TARS1-DT	ENSG00000251443	ENSG00000249572		82078	57305	rs7718953	A	7718953	intergenic_variant	1	0.7352	4e-15	14.3979	NA	0.0167	[0.013-0.021] unit increase	33366720	C	A	0.735247	0.99967616		!A	A	0.00278	-0.0174	0.000382	-0.02351	0.799	0.00307	1	1
Appendicular lean mass	450,243 European ancestry individuals	5p13.2	5	35188342	PRLR	PRLR			ENSG00000113494	NA	NA	rs6897259	T	6897259	intron_variant	0	0.3779	1e-13	13	NA	0.0145	[0.011-0.018] unit decrease	35188342	T	C	0.622689	0.9984081		!C	C	0.0348	-0.0111	0.0663	-0.01106	0.298	-0.01134	NA	1
Appendicular lean mass	450,243 European ancestry individuals	5p13.2	5	36181525	SKP2	SKP2			ENSG00000145604	NA	NA	rs7731023	A	7731023	3_prime_UTR_variant	0	0.4251	3e-18	17.5229	NA	0.0166	[0.013-0.02] unit decrease	36181525	A	G	0.575711	0.99296995		!G	G	0.19	-0.0068	0.382	-0.00515	0.257	-0.0123	NA	NA
Appendicular lean mass	450,243 European ancestry individuals	5p13.2	5	36803513	intergenic	SLC1A3-AS1 - NIPBL-DT	ENSG00000250155	ENSG00000285967		78309	60912	rs34313173	T	34313173	intergenic_variant	1	0.5525	3e-50	49.5229	NA	0.0284	[0.025-0.032] unit increase	36803512	TA	T	3.77107e-05	0.89158186		T	TA	0.464	0.372	0.369	0.81827	0.781	0.17046	NA	NA
Appendicular lean mass	450,243 European ancestry individuals	5p13.1	5	39424526	DAB2	DAB2			ENSG00000153071	NA	NA	rs1818782	A	1818782	intron_variant	0	0.3437	4e-14	13.3979	NA	0.0151	[0.011-0.019] unit decrease	39424526	A	C	0.655914	0.99711999		!C	C	0.893	8e-04	0.942	5e-04	0.901	0.00135	NA	NA
Appendicular lean mass	450,243 European ancestry individuals	5p12	5	42640964	GHR	GHR			ENSG00000112964	NA	NA	rs73087475	T	73087475	intron_variant	0	0.9077	3e-18	17.5229	NA	0.029	[0.023-0.035] unit decrease	42640964	T	C	0.0911869	0.99948933		C	T	0.623	0.0045	0.854	0.00189	0.484	0.01345	NA	NA
Appendicular lean mass	450,243 European ancestry individuals	5p12	5	42724192	GHR	GHR - CCDC152	ENSG00000112964	ENSG00000198865		2314	32626	rs62372052	A	62372052	intergenic_variant	1	0.8897	8e-40	39.0969	NA	0.0399	[0.034-0.046] unit decrease	42724192	A	G	0.107246	0.99910578		G	A	0.0177	0.0195	0.0315	0.02024	0.312	0.0171	1	1
Appendicular lean mass	450,243 European ancestry individuals	5q11.2	5	53471279	intergenic	RPL13AP13 - FST	ENSG00000213940	ENSG00000134363		264103	9347	rs62370472	T	62370472	intergenic_variant	1	0.791	1e-27	27	NA	0.0253	[0.021-0.03] unit increase	53471279	T	A	0	nan		NA	NA	NA	NA	NA	NA	NA	NA	NA	NA
Appendicular lean mass	450,243 European ancestry individuals	5q11.2	5	53471279	intergenic	RPL13AP13 - FST	ENSG00000213940	ENSG00000134363		264103	9347	rs62370472	T	62370472	intergenic_variant	1	0.791	1e-27	27	NA	0.0253	[0.021-0.03] unit increase	53471279	T	C	0.209916	0.99851284		C	T	9.65e-09	-0.0354	9.57e-07	-0.03507	0.00284	-0.03632	1	1
Appendicular lean mass	450,243 European ancestry individuals	5q11.2	5	53511646	intergenic	FST - NDUFS4	ENSG00000134363	ENSG00000164258		24512	48987	rs1833888	T	1833888	intergenic_variant	1	0.2322	8e-21	20.0969	NA	0.02	[0.016-0.024] unit decrease	53511646	T	C	0.768331	0.9971781		!C	C	0.000691	-0.0206	0.000542	-0.02389	0.456	-0.00942	NA	1
Appendicular lean mass	450,243 European ancestry individuals	5q11.2	5	54087229	ARL15	ARL15			ENSG00000185305	NA	NA	rs35748083	T	35748083	intron_variant	0	0.5682	1e-24	24	NA	0.0197	[0.016-0.023] unit decrease	54087229	C	T	0.568706	0.99657593		!T	T	0.00563	0.0143	0.0177	0.01395	0.151	0.01557	1	1
Appendicular lean mass	450,243 European ancestry individuals	5p15.32	5	5472950	ICE1	ICE1			ENSG00000164151	NA	NA	rs2578557	T	2578557	intron_variant	0	0.6417	2e-12	11.699	NA	0.0138	[0.0099-0.0177] unit decrease	5472950	C	T	0.641571	0.99990097		!T	T	0.625	0.0026	0.35	0.00566	0.488	-0.00769	NA	NA
Appendicular lean mass	450,243 European ancestry individuals	5q11.2	5	55586677	intergenic	AK4P2 - SLC38A9	ENSG00000249410	ENSG00000177058		34123	39168	rs4865956	A	4865956	intergenic_variant	1	0.6965	4e-36	35.3979	NA	0.0258	[0.022-0.03] unit decrease	55586677	T	A	0.696504	0.99791938		!A	A	0.0253	0.0124	0.227	0.00767	0.0147	0.02806	1	1
Appendicular lean mass	450,243 European ancestry individuals	5q11.2	5	56516303	C5orf67	C5orf67			ENSG00000225940	NA	NA	rs465983	A	465983	intron_variant	0	0.7642	5e-12	11.301	NA	0.0153	[0.011-0.02] unit increase	56516303	A	G	0.23628	0.99968619		G	A	2.97e-12	-0.0419	2.14e-10	-0.0435	0.00336	-0.03671	1	1
Appendicular lean mass	450,243 European ancestry individuals	5q11.2	5	56516303	C5orf67	C5orf67			ENSG00000225940	NA	NA	rs465983	A	465983	intron_variant	0	0.7642	5e-12	11.301	NA	0.0153	[0.011-0.02] unit increase	56516303	A	T	2.34831e-06	0.9912091		T	A	0.759	-0.3061	0.759	-0.30611	NA	NA	NA	NA
Appendicular lean mass	450,243 European ancestry individuals	5q13.1	5	68020097	intergenic	LINC02997 - RNU6-1232P	ENSG00000249364	ENSG00000252108		213497	138964	rs282302	A	282302	intergenic_variant	1	0.0902	7e-14	13.1549	NA	0.0252	[0.019-0.032] unit increase	68020097	G	A	0.0895468	0.99879875		A	G	0.0161	0.0217	0.0764	0.01823	0.0753	0.03363	1	1
Appendicular lean mass	450,243 European ancestry individuals	5q13.1	5	68289315	PIK3R1	PIK3R1			ENSG00000145675	NA	NA	rs34287	A	34287	intron_variant	0	0.341	1e-20	20	NA	0.0187	[0.015-0.023] unit increase	68289315	G	A	0.338814	0.99735959		A	G	0.0048	0.0152	0.00539	0.0171	0.425	0.00884	1	1
Appendicular lean mass	450,243 European ancestry individuals	5q13.1	5	68738909	intergenic	PIK3R1 - VWA8P1	ENSG00000145675	ENSG00000250289		437088	116001	rs152353	A	152353	intron_variant	1	0.199	4e-12	11.3979	NA	0.0163	[0.012-0.021] unit increase	68738909	A	G	0.80237	0.99612084		!G	G	1.28e-08	0.036	1.17e-06	0.0357	0.00313	0.03671	NA	1
Appendicular lean mass	450,243 European ancestry individuals	5q13.2	5	72400091	intergenic	PTCD2 - YBX1P5	ENSG00000049883	ENSG00000251108		31696	17398	rs10036789	C	10036789	regulatory_region_variant	1	0.5391	1e-17	17	NA	0.0163	[0.013-0.02] unit decrease	72400091	C	A	4.83878e-05	0.83955739		A	C	0.0592	0.8208	0.0592	0.82078	NA	NA	NA	NA
Appendicular lean mass	450,243 European ancestry individuals	5q13.2	5	72400091	intergenic	PTCD2 - YBX1P5	ENSG00000049883	ENSG00000251108		31696	17398	rs10036789	C	10036789	regulatory_region_variant	1	0.5391	1e-17	17	NA	0.0163	[0.013-0.02] unit decrease	72400091	C	G	0.460907	0.99657417		G	C	0.0038	0.0149	0.00516	0.01647	0.354	0.0098	1	1
Appendicular lean mass	450,243 European ancestry individuals	5q13.2	5	73115973	TMEM171	FCHO2 - TMEM171	ENSG00000157107	ENSG00000157111		25451	4596	rs609659	A	609659	regulatory_region_variant	1	0.5761	8e-13	12.0969	NA	0.0138	[0.01-0.018] unit decrease	73115973	G	A	0.579222	0.9978989		!A	A	0.919	5e-04	0.284	0.00641	0.0916	-0.01787	NA	NA
Appendicular lean mass	450,243 European ancestry individuals	5q14.1	5	77851157	TBCA	TBCA			ENSG00000171530	NA	NA	rs6877994	C	6877994	intron_variant	0	0.4842	1e-10	10	NA	0.012	[0.0083-0.0157] unit decrease	77851157	C	G	0.51439	0.99834728		G	C	0.0252	0.0115	0.0529	0.01131	0.26	0.01191	1	1
Appendicular lean mass	450,243 European ancestry individuals	5q14.3	5	83519339	VCAN	VCAN			ENSG00000038427	NA	NA	rs115912456	A	115912456	splice_polypyrimidine_tract_variant	0	0.9588	4e-34	33.3979	NA	0.0577	[0.048-0.067] unit decrease	83519339	A	G	0.0408126	0.99634319		G	A	4.4e-10	0.0777	1.99e-07	0.07581	0.000547	0.08264	1	1
Appendicular lean mass	450,243 European ancestry individuals	5q14.3	5	89060176	MEF2C-AS1	MEF2C-AS1			ENSG00000248309	NA	NA	rs13178887	T	13178887	intron_variant	0	0.6133	3e-17	16.5229	NA	0.0163	[0.013-0.02] unit increase	89060176	T	C	0.387073	0.99988513		C	T	0.167	-0.0072	0.364	-0.00541	0.22	-0.01345	NA	NA
Appendicular lean mass	450,243 European ancestry individuals	5q14.3	5	91099389	ADGRV1	ADGRV1, LUCAT1			ENSG00000164199, ENSG00000248323	NA	NA	rs2367279	T	2367279	intron_variant	0	0.9047	4e-09	8.39794	NA	0.0192	[0.013-0.026] unit decrease	91099389	G	T	0.904996	0.99695642		!T	T	0.326	-0.0086	0.145	-0.01471	0.566	0.01019	NA	NA
Appendicular lean mass	450,243 European ancestry individuals	5q15	5	96375901	AC104123.1	MIR583HG - PCSK1	ENSG00000250551	ENSG00000175426		160382	14432	rs55838622	A	55838622	intron_variant	1	0.754	1e-16	16	NA	0.0181	[0.014-0.022] unit decrease	96375901	A	C	0.22733	0.98866083		C	A	0.691	0.0024	0.426	0.00553	0.551	-0.0073	NA	NA
Appendicular lean mass	450,243 European ancestry individuals	5q15	5	96565342	CAST	CAST			ENSG00000153113	NA	NA	rs261223	A	261223	intron_variant	0	0.6298	2e-19	18.699	NA	0.0175	[0.014-0.021] unit decrease	96565342	A	C	0.369185	0.99940863		C	A	0.000725	0.0179	0.00186	0.01873	0.177	0.01499	1	1
Appendicular lean mass	450,243 European ancestry individuals	5q15	5	96565342	CAST	CAST			ENSG00000153113	NA	NA	rs261223	A	261223	intron_variant	0	0.6298	2e-19	18.699	NA	0.0175	[0.014-0.021] unit decrease	96565342	A	T	0.000457944	0.95178168		T	A	0.252	0.1168	0.197	0.20768	0.671	0.05592	NA	NA
Appendicular lean mass	450,243 European ancestry individuals	5q15	5	98822820	intergenic	RGMB - CSNK1A1P3	ENSG00000174136	ENSG00000250162		24177	10562	rs331917	A	331917	intergenic_variant	1	0.4197	4e-11	10.3979	NA	0.0127	[0.009-0.0164] unit increase	98822820	A	G	0.579522	0.99900641		!G	G	0.611	-0.0026	0.697	-0.00226	0.728	-0.00365	NA	NA
Appendicular lean mass	450,243 European ancestry individuals	6q21	6	108622962	FOXO3	FOXO3			ENSG00000118689	NA	NA	rs3813498	T	3813498	intron_variant	0	0.8126	6e-29	28.2218	NA	0.027	[0.022-0.032] unit increase	108622962	C	T	0.812978	0.99928494		!T	T	0.0267	-0.0146	0.0029	-0.02238	0.414	0.01115	1	1
Appendicular lean mass	450,243 European ancestry individuals	6q22.1	6	117169501	intergenic	RNA5SP214 - VGLL2	ENSG00000200248	ENSG00000170162		108702	96057	rs1405212	T	1405212	regulatory_region_variant	1	0.3721	1e-21	21	NA	0.0187	[0.015-0.022] unit decrease	117169501	T	C	0.627703	0.99961846		!C	C	0.000485	0.0184	0.00378	0.01747	0.0488	0.02133	NA	1
Appendicular lean mass	450,243 European ancestry individuals	6q22.31	6	125746509	HEY2	HEY2-AS1			ENSG00000237742	NA	NA	rs3966775	A	3966775	intron_variant	0	0.528	7e-26	25.1549	NA	0.0199	[0.016-0.024] unit increase	125746509	C	A	0.531164	0.99970019		!A	A	0.0134	-0.0127	0.00963	-0.01521	0.659	-0.00461	1	1
Appendicular lean mass	450,243 European ancestry individuals	6q22.32	6	126383649	AL356534.1	CENPW - MIR588	ENSG00000203760	ENSG00000207632		34774	100982	rs9388490	T	9388490	intron_variant	1	0.4394	1e-130	130	NA	0.0462	[0.042-0.05] unit increase	126383649	C	T	0.436752	0.99964857		T	C	3.18e-07	0.0264	7.13e-07	0.02917	0.112	0.0171	1	1
Appendicular lean mass	450,243 European ancestry individuals	6q22.33	6	127005497	AL356534.1	RPS4XP9 - RSPO3	ENSG00000217404	ENSG00000146374		321650	113174	rs13212016	T	13212016	intron_variant	1	0.2707	2e-21	20.699	NA	0.0202	[0.016-0.024] unit decrease	127005497	C	T	0.272545	0.99893911		T	C	0.0516	-0.0112	0.0637	-0.01219	0.502	-0.00788	NA	NA
Appendicular lean mass	450,243 European ancestry individuals	6q22.33	6	127133748	RSPO3	RSPO3			ENSG00000146374	NA	NA	rs72959041	A	72959041	intron_variant	0	0.0494	2e-18	17.699	NA	0.0384	[0.03-0.047] unit increase	127133748	G	A	0.050815	0.99853467		A	G	0.00148	0.0355	0.0376	0.02791	0.009	0.05266	1	1
Appendicular lean mass	450,243 European ancestry individuals	6q22.33	6	129501692	LAMA2	LAMA2			ENSG00000196569	NA	NA	rs9321170	A	9321170	non_coding_transcript_exon_variant	0	0.7272	1e-16	16	NA	0.0176	[0.013-0.022] unit increase	129501692	G	A	0.727288	0.99856319		!A	A	3.95e-05	-0.0236	1.49e-05	-0.02854	0.488	-0.00807	1	1
Appendicular lean mass	450,243 European ancestry individuals	6q23.1	6	130053316	L3MBTL3	L3MBTL3			ENSG00000198945	NA	NA	rs7740107	A	7740107	intron_variant	0	0.7362	7e-99	98.1549	NA	0.0451	[0.041-0.049] unit decrease	130053316	T	A	0.735341	0.99933429		!A	A	0.0032	0.0171	0.00123	0.02137	0.826	0.00269	1	1
Appendicular lean mass	450,243 European ancestry individuals	6q23.2	6	131058351	EPB41L2	EPB41L2			ENSG00000079819	NA	NA	rs78051210	T	78051210	intron_variant	0	0.9229	2e-13	12.699	NA	0.0263	[0.019-0.033] unit decrease	131058351	T	C	0.0782007	0.99936635		C	T	0.0313	0.0201	0.0778	0.01923	0.213	0.02248	1	1
Appendicular lean mass	450,243 European ancestry individuals	6q23.2	6	133302556	EYA4	EYA4			ENSG00000112319	NA	NA	rs6924144	T	6924144	intron_variant	0	0.7735	1e-14	14	NA	0.0174	[0.013-0.022] unit decrease	133302556	G	T	0.770895	0.99862749		!T	T	0.2	-0.0078	0.164	-0.00968	0.889	-0.00173	NA	NA
Appendicular lean mass	450,243 European ancestry individuals	6q23.2	6	134573684	AL078590.3	LINC03002			ENSG00000232310	NA	NA	rs228433	A	228433	intron_variant	0	0.6181	5e-13	12.301	NA	0.0144	[0.01-0.018] unit decrease	134573684	G	A	0.620562	0.98710917		!A	A	0.777	0.0015	0.733	-0.00214	0.255	0.01211	NA	NA
Appendicular lean mass	450,243 European ancestry individuals	6q24.1	6	138996691	intergenic	REPS1 - ABRACL	ENSG00000135597	ENSG00000146386		8430	32054	rs66883945	G	66883945	regulatory_region_variant	1	0.808	2e-12	11.699	NA	0.0172	[0.012-0.022] unit increase	138996690	G	GC	0.19642	0.9932347		GC	G	0.336	0.0062	0.373	0.00654	0.704	0.005	NA	NA
Appendicular lean mass	450,243 European ancestry individuals	6q24.1	6	139910690	intergenic	FILNC1 - LINC02941	ENSG00000231426	ENSG00000236013		50214	65662	rs2223966	A	2223966	intergenic_variant	1	0.7651	6e-17	16.2218	NA	0.0186	[0.014-0.023] unit increase	139910690	A	G	0.233833	0.99954598		G	A	0.355	-0.0056	0.52	-0.0044	0.445	-0.00999	NA	NA
Appendicular lean mass	450,243 European ancestry individuals	6q24.1	6	140412302	intergenic	MIR3668 - MIR4465	ENSG00000263514	ENSG00000264390		206976	271512	rs35686278	A	35686278	intron_variant	1	0.2265	9e-11	10.0458	NA	0.0146	[0.01-0.019] unit increase	140412302	G	A	0.226469	0.99965949		A	G	0.514	-0.0039	0.6	-0.00365	0.691	-0.0048	NA	NA
Appendicular lean mass	450,243 European ancestry individuals	6q24.2	6	142258233	AL360007.1	LINC02919			ENSG00000237494	NA	NA	rs9496306	T	9496306	intron_variant	0	0.3568	1e-14	14	NA	0.0151	[0.011-0.019] unit decrease	142258233	C	T	0.357722	0.99643486		T	C	0.679	0.0022	0.798	-0.00151	0.165	0.01576	NA	NA
Appendicular lean mass	450,243 European ancestry individuals	6q24.2	6	142395149	ADGRG6	ADGRG6			ENSG00000112414	NA	NA	rs6570509	T	6570509	intron_variant	0	0.2868	1e-31	31	NA	0.0244	[0.02-0.029] unit decrease	142395149	G	T	0.285602	0.99988997		T	G	3.49e-06	0.0265	0.000462	0.02263	0.000958	0.04036	NA	1
Appendicular lean mass	450,243 European ancestry individuals	6q25.1	6	151371933	ZBTB2	ZBTB2			ENSG00000181472	NA	NA	rs12190712	T	12190712	intron_variant	0	0.0947	3e-17	16.5229	NA	0.0269	[0.021-0.033] unit increase	151371933	C	T	0.0937178	0.99789223		T	C	0.0473	0.0176	0.0196	0.02338	0.857	-0.00346	1	1
Appendicular lean mass	450,243 European ancestry individuals	6q25.1	6	151789808	ESR1	ESR1			ENSG00000091831	NA	NA	rs543650	T	543650	intron_variant	0	0.4013	1e-37	37	NA	0.025	[0.021-0.029] unit decrease	151789808	T	G	0.597839	0.99411969		!G	G	0.0613	-0.0098	0.0245	-0.01345	0.845	0.00211	NA	NA
Appendicular lean mass	450,243 European ancestry individuals	6q25.2	6	152166049	SYNE1	SYNE1			ENSG00000131018	NA	NA	rs2635471	A	2635471	intron_variant	0	0.8541	5e-12	11.301	NA	0.0183	[0.013-0.024] unit decrease	152166049	G	A	0.852753	0.99789463		!A	A	0.49	-0.0049	0.0909	-0.01395	0.124	0.02191	NA	NA
Appendicular lean mass	450,243 European ancestry individuals	6p22.3	6	15507019	JARID2	JARID2			ENSG00000008083	NA	NA	rs35947355	A	35947355	intron_variant	0	0.224	6e-15	14.2218	NA	0.0178	[0.013-0.022] unit decrease	15507019	G	A	0.223282	0.9980071		A	G	0.142	-0.0091	0.0565	-0.01345	0.666	0.00557	NA	NA
Appendicular lean mass	450,243 European ancestry individuals	6q25.3	6	155233573	TIAM2	TIAM2			ENSG00000146426	NA	NA	rs3828729	A	3828729	intron_variant	0	0.6906	5e-15	14.301	NA	0.016	[0.012-0.02] unit increase	155233573	A	G	0.308027	0.99922232		G	A	0.349	-0.0052	0.456	-0.00478	0.557	-0.00673	NA	NA
Appendicular lean mass	450,243 European ancestry individuals	6q25.3	6	158249090	TULP4	TULP4			ENSG00000130338	NA	NA	rs3884262	CA	3884262	intron_variant	0	0.2652	6e-23	22.2218	NA	0.0215	[0.017-0.026] unit increase	158249089	CAAAAAAAA	C	2.34234e-06	0.99124081		NA	NA	NA	NA	NA	NA	NA	NA	NA	NA
Appendicular lean mass	450,243 European ancestry individuals	6q25.3	6	160348779	SLC22A3	SLC22A3			ENSG00000146477	NA	NA	rs668871	T	668871	synonymous_variant	0	0.4699	1e-27	27	NA	0.0205	[0.017-0.024] unit increase	160348779	C	T	0.468605	0.99967803		T	C	0.253	0.0058	0.231	0.00704	0.836	0.00211	NA	NA
Appendicular lean mass	450,243 European ancestry individuals	6q27	6	165928382	PDE10A	PDE10A			ENSG00000112541	NA	NA	rs7768382	T	7768382	intron_variant	0	0.5229	2e-26	25.699	NA	0.0201	[0.016-0.024] unit increase	165928382	T	C	0.478735	0.99844586		C	T	0.935	4e-04	0.763	0.00176	0.712	-0.00384	NA	NA
Appendicular lean mass	450,243 European ancestry individuals	6q27	6	168413712	intergenic	DACT2 - SMOC2	ENSG00000164488	ENSG00000112562		93935	27439	rs2763263	A	2763263	regulatory_region_variant	1	0.2445	1e-14	14	NA	0.017	[0.013-0.021] unit decrease	168413712	T	A	0.245254	0.9978578		A	T	0.407	0.0049	0.619	0.00339	0.425	0.00942	NA	NA
Appendicular lean mass	450,243 European ancestry individuals	6p22.3	6	18467409	RNF144B	RNF144B			ENSG00000137393	NA	NA	rs70974747	T	70974747	3_prime_UTR_variant	0	0.7051	5e-09	8.30103	NA	0.0123	[0.0082-0.0164] unit decrease	18467408	T	TG	0.295307	0.99766863		TG	T	0.397	-0.0048	0.567	-0.00365	0.462	-0.00903	NA	NA
Appendicular lean mass	450,243 European ancestry individuals	6p22.3	6	19053612	intergenic	MIR548A1HG - RPL21P61	ENSG00000283408	ENSG00000217379		379611	90083	rs2142644	A	2142644	intergenic_variant	1	0.672	3e-19	18.5229	NA	0.0181	[0.014-0.022] unit decrease	19053612	C	A	0.672364	0.99902289		!A	A	0.00652	0.017	0.00652	0.01697	1	0	1	1
Appendicular lean mass	450,243 European ancestry individuals	6p22.3	6	19839184	ID4	ID4			ENSG00000172201	NA	NA	rs41271299	T	41271299	intron_variant	0	0.0513	3e-47	46.5229	NA	0.0616	[0.053-0.07] unit increase	19839184	C	T	0.0518063	0.98942197		T	C	0.155	-0.0167	0.535	-0.00817	0.0538	-0.05035	NA	NA
Appendicular lean mass	450,243 European ancestry individuals	6p22.2	6	26185972	HIST1H2BE	H2BC6 - H4C4	ENSG00000274290	ENSG00000277157		1317	2738	rs9379832	A	9379832	intron_variant	1	0.7447	4e-24	23.3979	NA	0.0221	[0.018-0.026] unit increase	26185972	A	G	0.293612	0.99925951		G	A	0.177	0.0076	0.199	0.0083	0.637	0.00538	NA	NA
Appendicular lean mass	450,243 European ancestry individuals	6p25.2	6	2670364	MYLK4	MYLK4			ENSG00000145949	NA	NA	rs4959697	T	4959697	intron_variant	0	0.7435	4e-10	9.39794	NA	0.0136	[0.0093-0.0179] unit decrease	2670364	T	C	0.257792	0.99656335		C	T	0.312	0.0059	0.102	0.01094	0.394	-0.01019	NA	NA
Appendicular lean mass	450,243 European ancestry individuals	6p22.1	6	28086420	ZNF165	ZNF165, ZSCAN16-AS1			ENSG00000197279, ENSG00000269293	NA	NA	rs17767294	A	17767294	intron_variant	0	0.9226	2e-10	9.69897	NA	0.0224	[0.016-0.029] unit increase	28086420	A	G	0.0775332	0.99990517		G	A	0.65	-0.0044	0.82	-0.00251	0.596	-0.01076	NA	NA
Appendicular lean mass	450,243 European ancestry individuals	6p22.1	6	29587904	OR2H2	OR2H2, GABBR1			ENSG00000204657, ENSG00000204681	NA	NA	rs3095275	A	3095275	5_prime_UTR_variant	0	0.1998	9e-21	20.0458	NA	0.0223	[0.018-0.027] unit increase	29587904	A	G	0.793543	0.97835861		!G	G	0.937	-5e-04	0.524	-0.00465	0.334	0.01249	NA	NA
Appendicular lean mass	450,243 European ancestry individuals	6p21.33	6	31080438	RNU6-1133P	HCG22 - RNU6-1133P	ENSG00000228789	ENSG00000222895		20548	2572	rs373537558	A	373537558	regulatory_region_variant	1	0.9873	1e-12	12	NA	0.0855	[0.062-0.109] unit increase	31080438	A	G	0.000251523	0.79928235		G	A	0.257	-0.2174	0.257	-0.21736	NA	NA	NA	NA
Appendicular lean mass	450,243 European ancestry individuals	6p21.33	6	31347562	HLA-B	LINC02571 - HLA-B	ENSG00000256166	ENSG00000234745		45920	6310	rs9265954	T	9265954	intergenic_variant	1	0.0497	2e-18	17.699	NA	0.0604	[0.047-0.074] unit increase	31347562	C	T	0.147443	0.99998228		T	C	0.00183	0.0235	0.00313	0.02426	0.308	0.01922	1	1
Appendicular lean mass	450,243 European ancestry individuals	6p21.33	6	31357915	HLA-B	HLA-B			ENSG00000234745	NA	NA	rs9266244	A	9266244	intron_variant	0	0.7077	1e-94	94	NA	0.0427	[0.039-0.047] unit decrease	31357915	G	A	0.702286	0.99974812		!A	A	0.00541	0.0156	0.0323	0.01358	0.058	0.02248	1	1
Appendicular lean mass	450,243 European ancestry individuals	6p21.33	6	31594388	NCR3	NCR3 - UQCRHP1	ENSG00000204475	ENSG00000230622		1382	16695	rs536378929	T	536378929	intergenic_variant	1	0.9236	9e-26	25.0458	NA	0.0494	[0.04-0.059] unit decrease	31594388	T	C	3.94561e-08	0.033999964		NA	NA	NA	NA	NA	NA	NA	NA	NA	NA
Appendicular lean mass	450,243 European ancestry individuals	6p21.32	6	32586925	HLA-DRB1	HLA-DRB1			ENSG00000196126	NA	NA	rs4377812	T	4377812	intron_variant	0	0.9244	1e-17	17	NA	0.0409	[0.031-0.05] unit decrease	32586925	T	C	0.142202	0.98654503		C	T	0.00081	0.0261	0.00387	0.02376	0.0541	0.04747	1	1
Appendicular lean mass	450,243 European ancestry individuals	6p21.32	6	32961207	HLA-DMA	HLA-DMA			ENSG00000204257	NA	NA	rs9276931	A	9276931	intron_variant	0	0.8852	5e-23	22.301	NA	0.0292	[0.023-0.035] unit decrease	32961207	A	G	0.116963	0.99997242		G	A	0.388	0.007	0.727	0.00314	0.202	0.02421	NA	NA
Appendicular lean mass	450,243 European ancestry individuals	6p21.32	6	33225138	intergenic	ZNF70P1 - HTATSF1P1	ENSG00000225463	ENSG00000223457		8810	12661	rs1705001	A	1705001	intergenic_variant	1	0.2413	4e-11	10.3979	NA	0.0133	[0.0094-0.0172] unit increase	33225138	G	A	0.238321	0.99175873		A	G	0.0321	-0.0132	0.0064	-0.01886	0.525	0.00865	NA	1
Appendicular lean mass	450,243 European ancestry individuals	6p21.31	6	33591138	GGNBP1	LINC00336			ENSG00000197251	NA	NA	rs386906	T	386906	intron_variant	0	0.6533	7e-27	26.1549	NA	0.0213	[0.017-0.025] unit increase	33591138	C	T	0.653536	0.99966163		!T	T	0.498	0.0036	0.638	0.00289	0.585	0.00596	NA	NA
Appendicular lean mass	450,243 European ancestry individuals	6p21.31	6	33732599	IP6K3	IP6K3			ENSG00000161896	NA	NA	rs688209	T	688209	intron_variant	0	0.8021	1e-16	16	NA	0.0188	[0.014-0.023] unit increase	33732599	T	G	0.198633	0.99841113		G	T	0.198	-0.0084	0.475	-0.00528	0.164	-0.01922	NA	NA
Appendicular lean mass	450,243 European ancestry individuals	6p21.31	6	34160286	GRM4	GRM4 - KRT18P9	ENSG00000124493	ENSG00000271231		4664	29494	rs150556786	A	150556786	intergenic_variant	1	0.9977	3e-10	9.52288	NA	0.1402	[0.097-0.184] unit decrease	34160286	A	G	0.00192336	0.96614075		G	A	0.828	-0.0141	0.583	-0.03746	0.327	0.20486	NA	NA
Appendicular lean mass	450,243 European ancestry individuals	6p21.31	6	34236509	HMGA1	CYCSP55 - HMGA1	ENSG00000214810	ENSG00000137309		16443	364	rs191720756	A	191720756	non_coding_transcript_exon_variant	1	0.0128	4e-24	23.3979	NA	0.0865	[0.07-0.103] unit increase	34236509	G	A	0.0135679	0.99875247		A	G	0.302	-0.024	0.118	-0.0401	0.352	0.05189	NA	NA
Appendicular lean mass	450,243 European ancestry individuals	6p21.31	6	34237689	HMGA1	HMGA1			ENSG00000137309	NA	NA	rs202228093	G	202228093	intron_variant	0	0.1036	9e-77	76.0458	NA	0.058	[0.052-0.064] unit increase	34237688	GGAGCCCGAGCCCGAGCCC	G	1.86032e-07	0.048324827		NA	NA	NA	NA	NA	NA	NA	NA	NA	NA
Appendicular lean mass	450,243 European ancestry individuals	6p21.31	6	34749801	intergenic	ILRUN-AS1 - SNRPC	ENSG00000272288	ENSG00000124562		52323	7704	rs61431557	T	61431557	intergenic_variant	1	0.1368	4e-50	49.3979	NA	0.0408	[0.036-0.046] unit increase	34749801	C	T	0.137086	0.99986608		T	C	0.00803	0.0167	0.000385	0.03017	0.912	0.00173	1	1
Appendicular lean mass	450,243 European ancestry individuals	6p21.31	6	34762139	SNRPC	SNRPC			ENSG00000124562	NA	NA	rs559621619	A	559621619	intron_variant	0	0.9968	2e-12	11.699	NA	0.1268	[0.092-0.162] unit decrease	34762139	A	G	0.00344823	0.98975479		G	A	0.263	0.0473	0.366	0.04739	0.509	0.04708	NA	NA
Appendicular lean mass	450,243 European ancestry individuals	6p21.31	6	35427233	PPARD	PPARD			ENSG00000112033	NA	NA	rs3734254	T	3734254	3_prime_UTR_variant	0	0.7909	2e-33	32.699	NA	0.0279	[0.023-0.032] unit increase	35427233	C	T	0.794028	0.99964282		!T	T	0.000483	-0.0227	0.00129	-0.02338	0.171	-0.01999	1	1
Appendicular lean mass	450,243 European ancestry individuals	6p21.31	6	35489050	TEAD3	TEAD3			ENSG00000007866	NA	NA	rs72894776	T	72894776	intron_variant	0	0.1245	2e-15	14.699	NA	0.0238	[0.018-0.03] unit increase	35489050	C	T	0.125817	0.98881552		T	C	0.105	0.0127	0.13	0.01345	0.548	0.01019	NA	NA
Appendicular lean mass	450,243 European ancestry individuals	6p21.31	6	35971370	SLC26A8	SLC26A8			ENSG00000112053	NA	NA	rs35903333	CT	35903333	intron_variant	0	0.2227	2e-18	17.699	NA	0.0199	[0.015-0.024] unit decrease	35971369	C	CT	0.224602	0.99985825		CT	C	0.00888	-0.0161	0.00145	-0.02225	0.699	0.005	1	1
Appendicular lean mass	450,243 European ancestry individuals	6p21.2	6	39198083	KCNK5	KCNK5			ENSG00000164626	NA	NA	rs9394578	A	9394578	intron_variant	0	0.2577	3e-14	13.5229	NA	0.0164	[0.012-0.021] unit decrease	39198083	C	A	0.258357	0.99819371		A	C	0.54	-0.0035	0.69	-0.00264	0.586	-0.00653	NA	NA
Appendicular lean mass	450,243 European ancestry individuals	6p21.2	6	39831939	DAAM2	DAAM2			ENSG00000146122	NA	NA	rs75112004	G	75112004	intron_variant	0	0.7492	2e-11	10.699	NA	0.0148	[0.01-0.019] unit increase	39831938	G	GA	0.249584	0.99695042		GA	G	0.381	-0.0052	0.708	-0.00251	0.246	-0.01461	NA	NA
Appendicular lean mass	450,243 European ancestry individuals	6p21.1	6	41936060	CCND3	CCND3			ENSG00000112576	NA	NA	rs33966734	A	33966734	stop_gained	0	0.0136	2e-41	40.699	NA	0.1094	[0.094-0.125] unit decrease	41936060	C	A	0.0136245	0.99776917		A	C	0.0518	-0.0463	0.00956	-0.06487	0.0973	0.12645	NA	NA
Appendicular lean mass	244,730 European ancestry women	6p21.1	6	41936060	CCND3	CCND3			ENSG00000112576	NA	NA	rs33966734	A	33966734	stop_gained	0	0.014	3e-22	21.5229	NA	0.11	[0.088-0.132] unit decrease	41936060	C	A	0.0136245	0.99776917		A	C	0.0518	-0.0463	0.00956	-0.06487	0.0973	0.12645	NA	NA
Appendicular lean mass	205,513 European ancestry men	6p21.1	6	41936060	CCND3	CCND3			ENSG00000112576	NA	NA	rs33966734	A	33966734	stop_gained	0	0.014	6e-21	20.2218	NA	0.11	[0.086-0.134] unit decrease	41936060	C	A	0.0136245	0.99776917		A	C	0.0518	-0.0463	0.00956	-0.06487	0.0973	0.12645	NA	NA
Appendicular lean mass	450,243 European ancestry individuals	6p21.1	6	43034983	CUL7	RRP36 - RN7SL403P	ENSG00000124541	ENSG00000240625		827	1213	rs7762731	A	7762731	intergenic_variant	1	0.8604	4e-11	10.3979	NA	0.018	[0.013-0.023] unit increase	43034983	A	G	0.13999	0.99877813		G	A	0.93	6e-04	0.528	-0.00528	0.186	0.01999	NA	NA
Appendicular lean mass	450,243 European ancestry individuals	6p21.1	6	45112407	SUPT3H	SUPT3H			ENSG00000196284	NA	NA	rs1324538	A	1324538	intron_variant	0	0.3836	2e-34	33.699	NA	0.0237	[0.02-0.027] unit increase	45112407	T	A	0.383499	0.99992699		A	T	0.482	-0.0037	0.537	0.00377	0.0127	-0.02652	NA	NA
Appendicular lean mass	450,243 European ancestry individuals	6p12.1	6	55707389	intergenic	HMGCLL1 - BMP5	ENSG00000146151	ENSG00000112175		128192	46264	rs2208605	T	2208605	intergenic_variant	1	0.2078	4e-10	9.39794	NA	0.0146	[0.01-0.019] unit increase	55707389	T	C	0.791519	0.99973424		!C	C	0.0765	-0.011	0.0643	-0.01333	0.734	-0.00423	NA	NA
Appendicular lean mass	450,243 European ancestry individuals	6p12.1	6	56781699	DST	DST			ENSG00000151914	NA	NA	rs539280149	T	539280149	intron_variant	0	0.9988	6e-11	10.2218	NA	0.1898	[0.13-0.25] unit decrease	56781699	T	C	0.00123541	0.98907352		C	T	0.416	0.0296	0.0515	0.16908	0.992	0.00096	NA	NA
Appendicular lean mass	244,730 European ancestry women	6p24.3	6	7231610	RREB1	RREB1			ENSG00000124782	NA	NA	rs9379084	A	9379084	missense_variant	0	0.116	4e-09	8.39794	NA	0.02	[0.012-0.028] unit decrease	7231610	G	A	0.116647	0.98991871		A	G	0.669	0.0035	0.691	0.00365	0.87	0.00288	NA	NA
Appendicular lean mass	450,243 European ancestry individuals	6p24.3	6	7231610	RREB1	RREB1			ENSG00000124782	NA	NA	rs9379084	A	9379084	missense_variant	0	0.1155	2e-20	19.699	NA	0.0271	[0.021-0.033] unit decrease	7231610	G	A	0.116647	0.98991871		A	G	0.669	0.0035	0.691	0.00365	0.87	0.00288	NA	NA
Appendicular lean mass	205,513 European ancestry men	6p24.3	6	7231610	RREB1	RREB1			ENSG00000124782	NA	NA	rs9379084	A	9379084	missense_variant	0	0.116	3e-13	12.5229	NA	0.03	[0.022-0.038] unit decrease	7231610	G	A	0.116647	0.98991871		A	G	0.669	0.0035	0.691	0.00365	0.87	0.00288	NA	NA
Appendicular lean mass	450,243 European ancestry individuals	6p24.3	6	7718832	intergenic	RPL29P1 - BMP6	ENSG00000236512	ENSG00000153162		97954	7267	rs11243202	T	11243202	intergenic_variant	1	0.514	3e-57	56.5229	NA	0.0302	[0.026-0.034] unit decrease	7718832	T	C	0.479356	0.99640096		!C	C	0.151	-0.0074	0.0742	-0.01056	0.811	0.0025	NA	NA
Appendicular lean mass	450,243 European ancestry individuals	6p24.3	6	7800879	BMP6	BMP6			ENSG00000153162	NA	NA	rs6923462	T	6923462	intron_variant	0	0.8429	3e-24	23.5229	NA	0.0259	[0.021-0.031] unit decrease	7800879	T	C	0.157615	0.99810552		C	T	0.000229	-0.0258	0.00747	-0.0215	0.0058	-0.0394	NA	1
Appendicular lean mass	450,243 European ancestry individuals	6q14.1	6	80170421	BCKDHB	BCKDHB			ENSG00000083123	NA	NA	rs6931421	T	6931421	intron_variant	0	0.6776	2e-43	42.699	NA	0.0279	[0.024-0.032] unit increase	80170421	T	G	0.32225	0.99968936		G	T	0.744	-0.0035	1	0	0.744	-0.00346	NA	NA
Appendicular lean mass	450,243 European ancestry individuals	6q14.1	6	80340519	BCKDHB	BCKDHB			ENSG00000083123	NA	NA	rs9350850	T	9350850	intron_variant	0	0.9204	3e-24	23.5229	NA	0.0346	[0.028-0.041] unit decrease	80340519	T	C	0.0805545	0.99957854		C	T	0.242	0.0111	0.0906	0.01823	0.493	-0.01384	NA	NA
Appendicular lean mass	450,243 European ancestry individuals	6q14.1	6	81754463	TENT5A	TENT5A - SNORA70	ENSG00000112773	ENSG00000201945		1689	9561	rs34951006	T	34951006	TF_binding_site_variant	1	0.137	3e-13	12.5229	NA	0.0199	[0.015-0.025] unit increase	81754463	G	T	0.137664	0.99781722		T	G	0.00529	0.0211	0.00632	0.02326	0.431	0.01307	1	1
Appendicular lean mass	450,243 European ancestry individuals	6q14.1	6	81810304	LINC01526	SNORA70 - LINC01526	ENSG00000201945	ENSG00000224995		46148	2982	rs194633	A	194633	intergenic_variant	1	0.4417	2e-14	13.699	NA	0.0146	[0.011-0.018] unit decrease	81810304	C	A	0.442104	0.99832332		A	C	0.00963	-0.0134	0.00116	-0.01911	0.582	0.00596	1	1
Appendicular lean mass	450,243 European ancestry individuals	6q14.3	6	84660010	intergenic	LINC01611 - TBX18	ENSG00000231776	ENSG00000112837		103858	27341	rs35166681	T	35166681	intergenic_variant	1	0.841	2e-16	15.699	NA	0.0214	[0.016-0.026] unit decrease	84660009	T	TA	0.158571	0.99920972		TA	T	0.0271	0.0155	0.0201	0.01861	0.723	0.00519	1	1
Appendicular lean mass	450,243 European ancestry individuals	6q15	6	87328480	GJB7	GJB7, SMIM8			ENSG00000164411, ENSG00000111850	NA	NA	rs12190506	C	12190506	intron_variant	0	0.4645	9e-13	12.0458	NA	0.0138	[0.01-0.018] unit increase	87328480	G	C	0.497835	0.99946815		C	G	0.000756	0.0171	0.000215	0.02162	0.766	0.00307	1	1
Appendicular lean mass	450,243 European ancestry individuals	7q31.2	7	116627884	LINC01510	COMETT			ENSG00000231210	NA	NA	rs987666	A	987666	intron_variant	0	0.1188	2e-10	9.69897	NA	0.0185	[0.013-0.024] unit increase	116627884	G	A	0.119251	0.99960699		A	G	0.0522	0.0152	0.0779	0.01584	0.408	0.01307	NA	NA
Appendicular lean mass	450,243 European ancestry individuals	7q31.33	7	127375029	ZNF800	ZNF800			ENSG00000048405	NA	NA	rs62621812	A	62621812	missense_variant	0	0.0204	3e-27	26.5229	NA	0.0743	[0.061-0.088] unit increase	127375029	G	A	0.0216745	0.99756138		A	G	0.381	0.0147	0.405	0.01622	0.754	0.01038	NA	NA
Appendicular lean mass	205,513 European ancestry men	7q31.33	7	127375029	ZNF800	ZNF800			ENSG00000048405	NA	NA	rs62621812	A	62621812	missense_variant	0	0.02	5e-10	9.30103	NA	0.06	[0.04-0.08] unit increase	127375029	G	A	0.0216745	0.99756138		A	G	0.381	0.0147	0.405	0.01622	0.754	0.01038	NA	NA
Appendicular lean mass	244,730 European ancestry women	7q31.33	7	127375029	ZNF800	ZNF800			ENSG00000048405	NA	NA	rs62621812	A	62621812	missense_variant	0	0.02	2e-20	19.699	NA	0.08	[0.062-0.098] unit increase	127375029	G	A	0.0216745	0.99756138		A	G	0.381	0.0147	0.405	0.01622	0.754	0.01038	NA	NA
Appendicular lean mass	450,243 European ancestry individuals	7q32.3	7	130892534	AC016831.1	LINC-PINT, LINC00513			ENSG00000231721, ENSG00000233559	NA	NA	rs9690338	A	9690338	intron_variant	0	0.9163	1e-11	11	NA	0.0233	[0.017-0.03] unit decrease	130892534	A	G	0.084208	0.99757741		G	A	0.29	0.0098	0.11	0.01685	0.468	-0.01403	NA	NA
Appendicular lean mass	450,243 European ancestry individuals	7q33	7	135438312	CNOT4	CNOT4			ENSG00000080802	NA	NA	rs17480616	C	17480616	missense_variant	0	0.0307	5e-13	12.301	NA	0.0383	[0.028-0.049] unit increase	135438312	G	C	0.0310055	0.99946629		C	G	0.437	0.0115	0.31	0.01685	0.771	-0.00961	NA	NA
Appendicular lean mass	244,730 European ancestry women	7q33	7	135438312	CNOT4	CNOT4			ENSG00000080802	NA	NA	rs17480616	C	17480616	missense_variant	0	0.031	2e-06	5.69897	NA	0.04	[0.026-0.054] unit increase	135438312	G	C	0.0310055	0.99946629		C	G	0.437	0.0115	0.31	0.01685	0.771	-0.00961	NA	NA
Appendicular lean mass	205,513 European ancestry men	7q33	7	135438312	CNOT4	CNOT4			ENSG00000080802	NA	NA	rs17480616	C	17480616	missense_variant	0	0.031	4e-08	7.39794	NA	0.04	[0.024-0.056] unit increase	135438312	G	C	0.0310055	0.99946629		C	G	0.437	0.0115	0.31	0.01685	0.771	-0.00961	NA	NA
Appendicular lean mass	450,243 European ancestry individuals	7q33	7	135527876	intergenic	CNOT4 - NUP205	ENSG00000080802	ENSG00000155561		17731	30041	rs10627558	CGT	10627558	intergenic_variant	1	0.2353	7e-16	15.1549	NA	0.0181	[0.014-0.022] unit decrease	135527875	CGTGT	CGT	6.27345e-08	0.0094814198		NA	NA	NA	NA	NA	NA	NA	NA	NA	NA
Appendicular lean mass	450,243 European ancestry individuals	7q34	7	140036056	PARP12	PARP12			ENSG00000059378	NA	NA	rs199610373	A	199610373	intron_variant	0	0.8172	5e-27	26.301	NA	0.0264	[0.021-0.031] unit decrease	140036056	A	G	0.0045059	0.64760296		G	A	0.716	-0.019	0.716	-0.01898	NA	NA	NA	NA
Appendicular lean mass	450,243 European ancestry individuals	7q34	7	140624022	DENND2A	DENND2A			ENSG00000146966	NA	NA	rs269232	A	269232	intron_variant	0	0.7042	1e-12	12	NA	0.0147	[0.011-0.019] unit decrease	140624022	A	G	0.295376	0.9981184		G	A	0.295	0.0059	0.306	0.00654	0.756	0.00365	NA	NA
Appendicular lean mass	450,243 European ancestry individuals	7q36.1	7	148934463	intergenic	RN7SL569P - RNY4	ENSG00000239468	ENSG00000252316		43950	28852	rs822530	A	822530	intergenic_variant	1	0.2047	2e-27	26.699	NA	0.0255	[0.021-0.03] unit decrease	148934463	A	T	0.795759	0.99349057		!T	T	0.265	0.0156	1	0	0.265	0.01557	NA	NA
Appendicular lean mass	450,243 European ancestry individuals	7q36.1	7	150845623	AOC1	AOC1			ENSG00000002726	NA	NA	rs6977416	A	6977416	intron_variant	0	0.3338	1e-113	113	NA	0.0457	[0.042-0.05] unit increase	150845623	G	A	0.331173	0.99832345		A	G	4.69e-09	0.0324	1.73e-08	0.0352	0.0632	0.02229	1	1
Appendicular lean mass	450,243 European ancestry individuals	7q36.1	7	150985995	intergenic	KCNH2 - NOS3	ENSG00000055118	ENSG00000164867		7674	5022	rs10247107	A	10247107	TF_binding_site_variant	1	0.6044	8e-15	14.0969	NA	0.0174	[0.013-0.022] unit decrease	150985995	A	G	0.00369054	0.99664316		G	A	0.497	0.0338	0.458	0.03696	0.185	-1.41229	NA	NA
Appendicular lean mass	450,243 European ancestry individuals	7q36.1	7	150993088	NOS3	NOS3			ENSG00000164867	NA	NA	rs3918226	T	3918226	intron_variant	0	0.081	2e-27	26.699	NA	0.0386	[0.032-0.046] unit decrease	150993088	C	T	0.0829262	0.99685076		T	C	0.000118	-0.0356	0.000156	-0.0401	0.258	-0.02133	1	1
Appendicular lean mass	450,243 European ancestry individuals	7q36.3	7	156518670	LINC01006	RNF32-DT			ENSG00000182648	NA	NA	rs55911644	A	55911644	intron_variant	0	0.3609	9e-13	12.0458	NA	0.0141	[0.01-0.018] unit increase	156518670	T	A	0.361853	0.99801207		A	T	0.634	0.0025	0.413	0.00503	0.639	-0.005	NA	NA
Appendicular lean mass	450,243 European ancestry individuals	7p21.1	7	17868507	SNX13	SNX13			ENSG00000071189	NA	NA	rs2389858	A	2389858	splice_polypyrimidine_tract_variant	0	0.4945	2e-18	17.699	NA	0.0166	[0.013-0.02] unit increase	17868507	T	A	0.492701	0.99954281		A	T	0.143	0.0075	0.199	0.00754	0.481	0.00749	NA	NA
Appendicular lean mass	450,243 European ancestry individuals	7p21.1	7	18977248	HDAC9	HDAC9			ENSG00000048052	NA	NA	rs12533452	T	12533452	intron_variant	0	0.1569	1e-19	19	NA	0.0237	[0.019-0.029] unit increase	18977248	C	T	0.155251	0.99801955		T	C	0.0127	0.0176	0.0193	0.01886	0.36	0.01345	1	1
Appendicular lean mass	450,243 European ancestry individuals	7p15.3	7	23473474	IGF2BP3	IGF2BP3 - RPS2P32	ENSG00000136231	ENSG00000232818		2983	16999	rs34776209	T	34776209	regulatory_region_variant	1	0.2475	2e-47	46.699	NA	0.0317	[0.027-0.036] unit decrease	23473474	C	T	0.248657	0.99891005		T	C	0.00535	-0.0167	0.0191	-0.01584	0.126	-0.0196	1	1
Appendicular lean mass	450,243 European ancestry individuals	7p15.3	7	24679987	MPP6	PALS2			ENSG00000105926	NA	NA	rs2529049	A	2529049	intron_variant	0	0.2525	1e-10	10	NA	0.014	[0.0097-0.0183] unit increase	24679987	G	A	0.253479	0.99872234		A	G	0.547	-0.0028	0.975	0.00025	0.129	-0.01768	NA	NA
Appendicular lean mass	450,243 European ancestry individuals	7p15.2	7	25616743	AC005165.1	LINC03007			ENSG00000223561	NA	NA	rs73085996	C	73085996	intron_variant	0	0.2319	5e-10	9.30103	NA	0.0139	[0.0096-0.0182] unit decrease	25616743	G	C	0.231382	0.99885799		C	G	0.168	-0.0083	0.351	-0.00641	0.245	-0.01441	NA	NA
Appendicular lean mass	450,243 European ancestry individuals	7p15.2	7	25862019	intergenic	LINC03007 - MIR148A	ENSG00000223561	ENSG00000199085		110987	87900	rs12700667	A	12700667	intergenic_variant	1	0.7419	1e-17	17	NA	0.0184	[0.014-0.023] unit decrease	25862019	G	A	0.742062	0.99854084		!A	A	0.00052	0.0203	0.000198	0.02489	0.655	0.00538	1	1
Appendicular lean mass	450,243 European ancestry individuals	7p22.3	7	2721301	AMZ1	AMZ1			ENSG00000174945	NA	NA	rs798548	T	798548	intron_variant	0	0.6994	3e-68	67.5229	NA	0.0359	[0.032-0.04] unit increase	2721301	T	A	1.00712e-05	0.92059361		NA	NA	NA	NA	NA	NA	NA	NA	NA	NA
Appendicular lean mass	450,243 European ancestry individuals	7p22.3	7	2721301	AMZ1	AMZ1			ENSG00000174945	NA	NA	rs798548	T	798548	intron_variant	0	0.6994	3e-68	67.5229	NA	0.0359	[0.032-0.04] unit increase	2721301	T	C	0.302165	0.99978223		C	T	0.309	0.0057	0.638	0.00302	0.203	0.01518	NA	NA
Appendicular lean mass	450,243 European ancestry individuals	7p15.2	7	27403718	AC004009.1	HNRNPA1P73 - EIF4HP1	ENSG00000236569	ENSG00000233830		74184	54445	rs10951164	C	10951164	intron_variant	1	0.487	5e-16	15.301	NA	0.0153	[0.012-0.019] unit increase	27403718	G	C	0.485273	0.99988094		!C	C	0.303	0.0053	0.548	0.00352	0.299	0.01095	NA	NA
Appendicular lean mass	450,243 European ancestry individuals	7p15.1	7	28147796	JAZF1	JAZF1			ENSG00000153814	NA	NA	rs1708301	C	1708301	intron_variant	0	0.8509	2e-18	17.699	NA	0.0232	[0.018-0.028] unit decrease	28147796	G	C	0.849839	0.99959994		!C	C	0.838	-0.0013	0.978	-0.00025	0.666	-0.00615	NA	NA
Appendicular lean mass	450,243 European ancestry individuals	7p15.1	7	28520167	CREB5	CREB5			ENSG00000146592	NA	NA	rs177592	C	177592	intron_variant	0	0.1013	7e-13	12.1549	NA	0.0221	[0.016-0.028] unit decrease	28520167	G	C	0.100702	0.99655041		C	G	0.0469	-0.0171	0.0123	-0.02439	0.648	0.00826	1	1
Appendicular lean mass	450,243 European ancestry individuals	7p15.1	7	28789636	CREB5	CREB5			ENSG00000146592	NA	NA	rs62442203	C	62442203	intron_variant	0	0.4031	5e-23	22.301	NA	0.0191	[0.015-0.023] unit decrease	28789636	G	C	0.40412	0.99873483		C	G	0.572	0.0029	0.301	0.00616	0.492	-0.0073	NA	NA
Appendicular lean mass	450,243 European ancestry individuals	7p14.3	7	32868309	KBTBD2	KBTBD2			ENSG00000170852	NA	NA	rs117701289	A	117701289	3_prime_UTR_variant	0	0.9901	2e-19	18.699	NA	0.0888	[0.069-0.108] unit decrease	32868309	A	G	0.00996984	0.99091175		G	A	0.1	0.0473	0.0536	0.05645	0.142	-0.24214	NA	NA
Appendicular lean mass	450,243 European ancestry individuals	7p14.1	7	38073013	intergenic	SFRP4 - STARD3NL	ENSG00000106483	ENSG00000010270		47318	105232	rs1717720	A	1717720	intergenic_variant	1	0.346	3e-12	11.5229	NA	0.0139	[0.01-0.0178] unit decrease	38073013	A	G	0.653615	0.99987722		!G	G	0.745	0.0017	0.831	0.00126	0.77	0.00327	NA	NA
Appendicular lean mass	450,243 European ancestry individuals	7p14.1	7	42179969	GLI3	GLI3			ENSG00000106571	NA	NA	rs57734857	A	57734857	intron_variant	0	0.7958	6e-11	10.2218	NA	0.0154	[0.011-0.02] unit decrease	42179969	A	T	0.204926	0.99967175		T	A	0.0415	0.0132	0.0584	0.01383	0.434	0.01076	1	1
Appendicular lean mass	450,243 European ancestry individuals	7p12.3	7	45970501	AC073115.2	IGFBP3 - FTLP15	ENSG00000146674	ENSG00000233952		48627	27039	rs10260816	C	10260816	intron_variant	1	0.5606	4e-13	12.3979	NA	0.0138	[0.01-0.018] unit decrease	45970501	C	A	4.4774e-05	0.95320812		A	C	0.982	-0.0024	0.28	-0.36796	0.751	0.03421	NA	NA
Appendicular lean mass	450,243 European ancestry individuals	7p12.3	7	45970501	AC073115.2	IGFBP3 - FTLP15	ENSG00000146674	ENSG00000233952		48627	27039	rs10260816	C	10260816	intron_variant	1	0.5606	4e-13	12.3979	NA	0.0138	[0.01-0.018] unit decrease	45970501	C	G	0.438015	0.99877392		G	C	0.0785	0.0091	0.269	0.00654	0.0996	0.01787	NA	NA
Appendicular lean mass	450,243 European ancestry individuals		NA	NA	intergenic					NA	NA	chr7:46262082	A	NA		1	0.4976	3e-12	11.5229	NA	0.0132	[0.0095-0.0169] unit increase	46262082	G	A	0	nan		NA	NA	NA	NA	NA	NA	NA	NA	NA	NA
Appendicular lean mass	450,243 European ancestry individuals		NA	NA	intergenic					NA	NA	chr7:46262082	A	NA		1	0.4976	3e-12	11.5229	NA	0.0132	[0.0095-0.0169] unit increase	46262082	G	A	0	nan		NA	NA	NA	NA	NA	NA	NA	NA	NA	NA
Appendicular lean mass	450,243 European ancestry individuals	7p22.1	7	4641825	intergenic	CYP3A54P - FOXK1	ENSG00000261809	ENSG00000164916		129792	40470	rs76400633	T	76400633	regulatory_region_variant	1	0.7831	6e-11	10.2218	NA	0.0151	[0.011-0.02] unit increase	4641825	T	C	0.218717	0.99387433		C	T	0.0154	-0.0151	0.0118	-0.01785	0.661	-0.00577	1	1
Appendicular lean mass	450,243 European ancestry individuals	7p12.3	7	46468058	intergenic	ZNF619P1 - HMGN1P19	ENSG00000224547	ENSG00000224519		322370	166556	rs13237426	T	13237426	intergenic_variant	1	0.9381	1e-24	24	NA	0.0386	[0.031-0.046] unit increase	46468058	T	C	0.0624778	0.99915464		C	T	0.00164	-0.0318	0.013	-0.02992	0.0505	-0.03632	1	1
Appendicular lean mass	450,243 European ancestry individuals	7p12.3	7	46537458	intergenic	ZNF619P1 - HMGN1P19	ENSG00000224547	ENSG00000224519		391770	97156	rs723149	A	723149	intergenic_variant	1	0.4372	1e-47	47	NA	0.0276	[0.024-0.031] unit increase	46537458	A	G	0.563925	0.9928855		!G	G	0.00376	0.015	0.0385	0.01219	0.024	0.02441	NA	1
Appendicular lean mass	450,243 European ancestry individuals	7p12.3	7	46598293	intergenic	ZNF619P1 - HMGN1P19	ENSG00000224547	ENSG00000224519		452605	36321	rs143741275	A	143741275	intergenic_variant	1	0.5772	1e-29	29	NA	0.0213	[0.018-0.025] unit decrease	46598292	AGTGTGTGTGTGTGTGTGTGT	AGTGTGTGTGT	1.16925e-06	0.99404373		NA	NA	NA	NA	NA	NA	NA	NA	NA	NA
Appendicular lean mass	450,243 European ancestry individuals	7p12.1	7	50675543	GRB10	GRB10			ENSG00000106070	NA	NA	rs2237474	T	2237474	intron_variant	0	0.3586	1e-20	20	NA	0.0183	[0.014-0.022] unit increase	50675543	T	G	0.64353	0.9995033		!G	G	0.12	0.0084	0.0389	0.01257	0.553	-0.00692	NA	NA
Appendicular lean mass	450,243 European ancestry individuals	7p11.2	7	55833754	SEPT14	SEPTIN14			ENSG00000154997	NA	NA	rs28895377	A	28895377	intron_variant	0	0.8847	2e-16	15.699	NA	0.0243	[0.018-0.03] unit increase	55833754	A	T	0.1139	0.99880102		T	A	0.342	-0.0078	0.629	-0.0044	0.235	-0.02248	NA	NA
Appendicular lean mass	450,243 European ancestry individuals	7q11.22	7	70750372	AUTS2	AUTS2			ENSG00000158321	NA	NA	rs12698934	A	12698934	intron_variant	0	0.1668	8e-15	14.0969	NA	0.0198	[0.015-0.025] unit increase	70750372	G	A	0.168832	0.99819068		A	G	0.393	0.0046	0.213	0.00968	0.957	-0.00077	NA	NA
Appendicular lean mass	450,243 European ancestry individuals	7q11.23	7	73577374	TBL2	TBL2			ENSG00000106638	NA	NA	rs12540011	A	12540011	intron_variant	0	0.2835	3e-22	21.5229	NA	0.0203	[0.016-0.024] unit increase	73577374	G	A	0.284962	0.99992124		A	G	0.512	0.0028	0.315	0.00654	0.954	-0.00058	NA	NA
[truncated: 438 more rows]

## Sheet: ST9
Supplementary Table 9. FinnGen Consortium membership and roles.
[truncated: 475 more rows]

[truncated: 2 more sheets: ST10, ST11]
